# Supplementary material for: The evolutionary history of the field vole species complex revealed by modern and ancient genomes
Source: Research Square preprint supplement (doi:10.21203/rs.3.rs-4848610/v1), 2025-01-09
Supplement: Supplementary file 1 [file 5812c2dbcaf4a7a8953b99fb.xlsx]

## Sheet: Tab. S1 ancient samples
Table S1. Ancient samples used in this study, mtDNA mapping and consensus calling statistics, molecular age estimation
	Lab ID	Country	Site	Layer	Library type	mapped reads	mean depth of mtDNA coverage	bases covered at least 3 times	Lineage	approx age	median of age estimate**	95%HPD of age estimate	Reference used for mapping*	Sample accesion
1	MI052	Russia	Cheremukhovo 1	7A	DS	2779	15.8532	0.971955	Short-tailed	13,5 ka BP	14875	17999, 12499	AGR	ERS17660735
2	MI053	Russia	Cheremukhovo 1	7A	DS	3127	17.7711	0.981508	Short-tailed	13,5 ka BP	14397	17474, 11998	AGR	ERS17660736
3	MI054	Russia	Cheremukhovo 1	5	DS	9116	49.8706	0.991305	Short-tailed	5,7 ka	3550	6374, 1069	AGR	ERS17660737
4	MI055	Russia	Cheremukhovo 1	5	DS	2353	12.4186	0.974588	Short-tailed	5,7 ka	901	2388, 102	AGR	ERS17660738
5	MI057	Russia	Mironovskaya III	6	DS	8888	44.3709	0.991734	Short-tailed	no data	3560	3630, 3490	AGR	ERS17660739
6	MI058	Russia	Mironovskaya III	7	DS	14378	74.3091	0.993632	Short-tailed	ca. 11,3 ka BP	13314	16808, 10799	AGR	ERS17660740
7	MI063	Russia	Pershinskaya 1	3	DS	11660	61.171	0.990754	Short-tailed	ca. 8,2 ka BP	3947	6990, 1396	AGR	ERS17660741
8	MI076	Poland	Obłazowa (WE)	IIIa	DS	1795	9.02767	0.888862	Short-tailed	17–14 ka ago	15705	18649, 11752	AGR	ERS17660742
9	MI094	Poland	Nad Tunelem cave	yellow	DS	15476	78.6215	0.994856	Short-tailed	12–10 ka BP	13003	15684, 10234	AGR	ERS17660743
10	MI095	Poland	Nad Tunelem cave	grey	DS	16865	87.442	0.99553	Short-tailed	12–10 ka BP	11780	11930, 11650	AGR	ERS17660744
11	MI096	Poland	Nad Tunelem cave	grey	DS	16953	87.994	0.991305	Short-tailed	12–10 ka BP	10090	10200, 9920	AGR	ERS17660745
12	MI1014	Poland	Krucza Skała	7	DS	4442	22.5145	0.993081	Short-tailed	15–12 ka BP	14783	17135, 12076	AGR	ERS17660746
13	MI1022	Poland	Shelter III in Smoleń	3	DS	4832	25.4196	0.96773	Short-tailed	Holocene	13297	14850, 11816	AGR	ERS17660747
14	MI1025	Poland	Shelter III in Smoleń	6	DS	12671	65.2176	0.995714	Short-tailed	Holocene	11532	14573, 8616	AGR	ERS17660748
15	MI1026	Poland	Shelter III in Smoleń	4	DS	6531	34.4422	0.987019	Short-tailed	Holocene	15256	17278, 13135	AGR	ERS17660749
16	MI1027	Poland	Shelter III in Smoleń	8	DS	8356	42.4508	0.992897	Short-tailed	Holocene	14910	15200, 14360	AGR	ERS17660750
17	MI1028	Poland	Shelter III in Smoleń	4	DS	2685	13.9731	0.937665	Short-tailed	Holocene	13805	16379, 10773	AGR	ERS17660751
18	MI1081	Poland	Perspektywiczna cave	7c	DS	5147	27.1199	0.987325	Short-tailed	Late Pleistocene	52907	58638, 46877	AGR	ERS17660752
19	MI1137	Poland	Mamutowa Cave	2	SS	22787	58.826	0.998405	Short-tailed	35–11 ka	15614	17718, 13260	AGR	ERS17660753
20	MI1139	Poland	Mamutowa Cave	2	SS	26550	75.3852	0.999632	Short-tailed	35–11 ka	16472	18901, 14373	AGR	ERS17660754
21	MI1158	Poland	Deszczowa	VIIa	SS	52161	260.489	0.999877	Short-tailed	Late Pleistocene	15609	17774, 13155	AGR	ERS17660755
22	MI1253	Poland	Żarska cave	6	DS	6611	35.8591	0.982855	Short-tailed	6.5–6 ka	5794	8750, 2812	AGR	ERS17660756
23	MI1332	Slovakia	Muráň 3	3	DS	9451	48.1684	0.99455	Short-tailed	ca 12 ka BP	14696	17925, 11414	AGR	ERS17660757
24	MI1341	Slovakia	Muráň 3	6	DS	28680	166.7	0.997857	Short-tailed	ca. 24 ka BP	14963	17087, 12589	AGR	ERS17660758
25	MI1396	Russia	Rasik	B 16	DS	8493	44.6779	0.990019	Short-tailed	post-LGM	15347	18238, 13254	AGR	ERS17660759
26	MI1832	Slovakia	Dzeravá skala	PP1/96	SS	27109	102.385	0.999877	Short-tailed	Late Pleistocene	31439	37849, 24611	AGR	ERS17660760
27	MI199	Spain	Artazu VII	LL G	SS	19698	55.5539	0.993326	Portuguese	Late Pleistocene	45744	52463, 39030	SPAIN_AGR711	ERS17660761
28	MI1992	Czech Republic	Bišilu	4	SS	24289	89.7223	0.999939	Short-tailed	post-LGM	12000	15662, 8163	AGR	ERS17660762
29	MI1999	Czech Republic	Bišilu	3a	SS	3986	10.5	0.953304	Short-tailed	post-LGM	16178	18524, 13911	AGR	ERS17660763
30	MI2126	Spain	El Mirón	5.1	SS	19577	63.8281	0.997489	Portuguese	MIS2 - MIS1	15853	18737, 12163	SPAIN_AGR711	ERS17660764
31	MI2127	Spain	El Mirón	9.6	SS	14086	43.3308	0.979609	Mediterranean	MIS2 - MIS1	4998	7803, 2340	SPAIN_AGR711	ERS17660765
32	MI2262	Poland	Obłazowa 2	-	DS	2448	13.4557	0.905762	Short-tailed	42–38 ka BP	52462	63660, 41257	AGR	ERS17660766
33	MI2263	Poland	Obłazowa 2	-	DS	3339	18.3169	0.947646	Short-tailed	42–38 ka BP	46589	52491, 39934	AGR	ERS17660767
34	MI2265	Poland	Obłazowa 2	-	DS	988	5.64484	0.793889	Short-tailed	42–38 ka BP	45213	51762, 38673	AGR	ERS17660768
35	MI2277	Poland	Obłazowa (WE)	III	DS	5995	32.629	0.958361	Short-tailed	17–14 ka ago	18141	19844, 16393	AGR	ERS17660769
36	MI2398	Poland	Cisowa Rock	II	DS	6540	36.7636	0.98463	Short-tailed	17–14 ka ago	14785	16629, 12692	AGR	ERS17660770
37	MI260	Hungary	Petenyi Cave	P2	DS	3642	18.173	0.989958	Short-tailed	post-LGM	16367	18843, 13599	AGR	ERS17660771
38	MI266	Hungary	Rejtek III	200–180	DS	4347	20.7351	0.990815	Short-tailed	14–13 ka	13086	21336, 5241	AGR	ERS17660772
39	MI2913	Italy	Caverna degli Orsi	I22	SS	5970	16.5547	0.943665	Italian	Late Pleistocene	50526	55425, 45665	ITA	ERS17660773
40	MI2915	Italy	Caverna degli Orsi	I22	SS	5211	13.8427	0.949115	Italian	Late Pleistocene	53556	60300, 46281	ITA	ERS17660774
41	MI2949	Italy	Grotta della Ferrovia	5	SS	20958	84.9064	0.997551	Mediterranean	22–20 ka BP	19729	26090, 13427	ITA	ERS17660775
42	MI2950	Italy	Grotta della Ferrovia	5	SS	26702	118.815	0.997489	Mediterranean	22–20 ka BP	16515	23730, 9928	ITA	ERS17660776
43	MI2951	Italy	Grotta della Ferrovia	5	SS	19022	74.9029	0.997489	Mediterranean	22–20 ka BP	17475	24293, 10781	ITA	ERS17660777
44	MI3063	Spain	Eirós	2	SS	9491	31.7373	0.996081	Portuguese	ca. 35 ka BP	31485	37257, 25867	SPAIN_AGR711	ERS17660778
45	MI3064	Spain	Eirós	2	SS	17057	56.8921	0.997612	Portuguese	ca. 35 ka BP	38706	45725, 31797	SPAIN_AGR711	ERS17660779
46	MI3070	Spain	Eirós	3C	SS	16581	58.2313	0.995469	Portuguese	44–40 ka BP	870	2355, 89	SPAIN_AGR711	ERS17660780
47	MI3071	Spain	Eirós	4AS	SS	11955	38.1258	0.991489	Portuguese	Late Pleistocene	42203	47207, 37220	SPAIN_AGR711	ERS17660781
48	MI3072	Spain	Eirós	4C	SS	13163	39.1018	0.995652	Portuguese	Late Pleistocene	46483	53127, 40184	SPAIN_AGR711	ERS17660782
49	MI3073	Spain	Eirós	5	SS	16866	54.9148	0.997	Portuguese	Late Pleistocene	60418	67992, 52620	SPAIN_AGR711	ERS17660783
50	MI3074	Poland	Łabajowa	H3	SS	35086	151.975	0.997796	Short-tailed	Late Pleistocene	16471	18873, 14369	AGR	ERS17660784
51	MI3076	Poland	Łabajowa	H8	SS	23764	78.1891	0.997796	Short-tailed	Late Pleistocene	75184	86495, 64722	AGR	ERS17660785
52	MI3077	Poland	Łabajowa	H8+H9	SS	11480	32.8877	0.996877	Short-tailed	Late Pleistocene	80670	91760, 70398	AGR	ERS17660786
53	MI3078	Poland	Łabajowa	H9	SS	23966	70.473	0.997428	Short-tailed	Late Pleistocene	76348	86060, 67438	AGR	ERS17660787
54	MI3079	Poland	Łabajowa	H9	SS	28801	96.2494	0.997734	Short-tailed	Late Pleistocene	74695	85597, 63855	AGR	ERS17660788
55	MI3294	United Kingdom	Sedrup Farm	-	SS	11816	37.9	0.99	Short-tailed	Late Pleistocene/Holocene	1306	2739, 296	AGR	ERS17660789
56	MI3541	Italy	De Nadale Cave	7tetto	SS	8522	21.372	0.969392	Italian	MIS4	54000	60797, 47110	SPAIN_WM070	ERS17660790
57	MI3566	Italy	Cava a Filo	US100	SS	27152	107.934	0.999509	Mediterranean	Late Pleistocene	14554	22055, 8028	SPAIN_WM070	ERS17660791
58	MI357	Czech Republic	Býčí	7b	DS	8615	42.2809	0.994611	Short-tailed	12.5–8 ka	14332	16771, 11695	AGR	ERS17660792
59	MI366	Czech Republic	Býčí	Hv4a	DS	13144	69.1016	0.99406	Short-tailed	12.5–8 ka	15776	18330, 13070	AGR	ERS17660793
60	MI371	Czech Republic	Býčí	H4b	SS	11634	59.4694	0.994122	Short-tailed	12.5–8 ka	12506	14432, 10499	AGR	ERS17660794
61	MI372	Czech Republic	Býčí	H4b	SS	40274	226.662	0.997918	Short-tailed	12.5–8 ka	10270	13249, 7018	AGR	ERS17660795
62	MI375	Czech Republic	Býčí	H4b	DS	4388	22.8443	0.958361	Short-tailed	12.5–8 ka	15099	18243, 11260	AGR	ERS17660796
63	MI377	Czech Republic	Býčí	8c	DS	14098	72.861	0.99455	Short-tailed	12.5–8 ka	13140	13300, 13000	AGR	ERS17660797
64	MI380	Czech Republic	Býčí	8c	DS	2136	10.8198	0.965648	Short-tailed	12.5–8 ka	16246	19793, 12815	AGR	ERS17660798
65	MI599	Italy	Grotta del Sambuco	5	DS	4222	22.1104	0.979242	Italian	27–19 ka	21202	24917, 17212	ITA	ERS17660799
66	MI605	Italy	Grotta del Sambuco	6(6-7)	SS	2419	12.6687	0.956892	Italian	27,5 ka BP	28411	30366, 26423	ITA	ERS17660800
67	MI606	Italy	Grotta del Sambuco	6(6-7)	DS	10413	31.9	0.97	Italian	27,5 ka BP	26730	26970, 26420	ITA	ERS17660801
68	MI696	Spain	El Portalón		DS	3604	17.9358	0.984998	Mediterranean	Holocene	2248	4440, 600	SPAIN_AGR711	ERS17660802
69	MI710	Spain	Valdavara 1	2	DS	9865	52.0858	0.978446	Portuguese	Mid Holocene	2096	3982, 672	SPAIN_AGR711	ERS17660803
70	MI711	Spain	Valdavara 1	2	DS	12191	67.7342	0.990141	Portuguese	Mid Holocene	2105	3999, 695	SPAIN_AGR711	ERS17660804
71	MI715	Spain	Valdavara 1	4	DS	1718	8.7952	0.890331	Portuguese	18–15 ka BP	21667	25414, 17716	SPAIN_AGR711	ERS17660805
72	MI721	Spain	Valdavara 1	5	DS	2714	14.4119	0.92701	Portuguese	18–15 ka BP	19119	23152, 14889	SPAIN_AGR711	ERS17660806
73	MI722	Spain	Valdavara 1	5	DS	7899	40.6682	0.992285	Portuguese	18–15 ka BP	18440	18690, 18290	AGR	ERS17660807
74	MI894	Poland	Shelter III in Smoleń	5	DS	14167	73.7153	0.987753	Short-tailed	Holocene	14663	16738, 12319	AGR	ERS17660808
75	MI895	Poland	Shelter III in Smoleń	7	DS	2781	13.8852	0.904109	Short-tailed	Holocene	11190	13200, 8999	AGR	ERS17660809
76	MI897	Poland	Shelter III in Smoleń	8	DS	4192	20.6557	0.987447	Short-tailed	Holocene	14889	15484, 14175	AGR	ERS17660810
77	MI898	Poland	Shelter III in Smoleń	6	DS	3346	16.9317	0.982365	Short-tailed	Holocene	15335	17325, 13000	AGR	ERS17660811
78	MI900	Poland	Shelter III in Smoleń	2	DS	3680	18.21	0.98659	Short-tailed	Holocene	13770	14020, 13600	AGR	ERS17660812
79	MI905	Poland	Shelter III in Smoleń	3	DS	6882	35.6207	0.988917	Short-tailed	Holocene	12320	12620, 12000	AGR	ERS17660813
80	MI906	Poland	Shelter III in Smoleń	3	DS	4356	21.8029	0.985365	Short-tailed	Holocene	13361	16441, 10070	AGR	ERS17660814
81	MI908	Poland	Shelter III in Smoleń	5a	DS	7156	35.7335	0.989897	Short-tailed	Holocene	12460	12680, 12100	AGR	ERS17660815
82	MI957	Hungary	Petényi Cave	P2	DS	13223	40.6183	0.999939	Short-tailed	Post-LGM	16722	18365, 14905	AGR	ERS17660816
83	MI978	Czech Republic	Býčí	8c	DS	3312	17.298	0.91262	Short-tailed	12.5–8 ka ago	10881	13821, 7682	AGR	ERS17660817
*	mtDNA references used in this study may be downloaded from RepOD respoitory doi: https://doi.org/10.18150/DNEO1W
**	Samples marked in red has been directly radiocarbon dated (Table S7), presented is the median callibrated age.

## Sheet: Tab. S2 modern samples
Table S2. Modern samples used in this study, mtDNA mapping and consensus calling statistics
No	Lab ID	Collection ID	Collection*	Form	Country	Locality	Lat	Lon	Lineage	Method	unique reads mapping to mtDNA	fold mtDNA coverage	bases covered min, 3 times	Sample accesion	DNA extraction method**	mtDNA reference used form mapping***
1	WM001		MRI PAS	DNA extract	Poland	Białowieża	52.70	23.91	Short-tailed	PCR	63919	360.091		ERS17660818	DNA extract	AGR
2	WM005		MRI PAS	DNA extract	Poland	Bory Tucholskie	53.67	18.24	Short-tailed	target	25603	172.219		ERS17660819	DNA extract	AGR
3	WM006		MRI PAS	DNA extract	Poland	Bory Tucholskie	53.67	18.24	Short-tailed	target	29160	204.513		ERS17660820	DNA extract	AGR
4	WM009		MRI PAS	DNA extract	Poland	Urwitałt	53.80	21.64	Short-tailed	target	29593	206.492		ERS17660821	DNA extract	AGR
5	WM024		MRI PAS	DNA extract	Norwey	Sennalandet	70.28	24.08	Short-tailed	target	17690	110.462		ERS17660822	DNA extract	AGR
6	WM441	ANB6	NMS	DNA extract	Norwey	Ekse	60.83	6.24	Short-tailed	target	16388	94.2433		ERS17660823	DNA extract	AGR
7	WM027	769	MRI PAS	DNA extract	Russia	Briansk	53.36	34.39	Short-tailed	target	7537	46.2818		ERS17660824	DNA extract	AGR
8	WM028	15-13	MRI PAS	DNA extract	Russia	Novgorod Region, Demyansk town	57.37	32.27	Short-tailed	target	16551	116.839		ERS17660825	DNA extract	AGR
9	WM029	15-14	MRI PAS	DNA extract	Russia	Novgorod Region, Demyansk town	57.37	32.27	Short-tailed	target	6773	45.5272		ERS17660826	DNA extract	AGR
10	WM030	8-18	MRI PAS	DNA extract	Russia	Irkutsk Region, Baikal Lake	52.06	105.23	Short-tailed	target	28955	217.244		ERS17660827	DNA extract	AGR
11	WM052	F309E1	NMS	DNA extract	France	Bretagne	48.65	-2.03	Short-tailed	target	35640	219.784		ERS17660828	DNA extract	AGR
12	WM053	276M	NMS	DNA extract	Great Britain	Inverness	56.93	-5.87	Short-tailed	target	29419	174.319		ERS17660829	DNA extract	AGR
13	WM054	167	NMS	DNA extract	Great Britain	North Uist	57.52	-7.32	Short-tailed	target	35461	214.85		ERS17660830	DNA extract	AGR
14	WM055	660M	NMS	DNA extract	Great Britain	Lincolnshire	53.53	-0.82	Short-tailed	target	38115	233.331		ERS17660831	DNA extract	AGR
15	WM056	444M	NMS	DNA extract	Great Britain	Warwickshire	52.39	-1.56	Short-tailed	target	39737	242.657		ERS17660832	DNA extract	AGR
16	WM057	F308E1	NMS	DNA extract	France	Bretagne	48.65	-2.03	Short-tailed	target	28160	167.757		ERS17660833	DNA extract	AGR
17	WM058	F264E1	NMS	DNA extract	France	Bretagne	48.65	-2.03	Short-tailed	target	25098	146.722		ERS17660834	DNA extract	AGR
18	WM059	436M	NMS	DNA extract	Great Britain	Hampshire	51.08	-1.24	Short-tailed	target	36957	220.909		ERS17660835	DNA extract	AGR
19	WM060	93566	MRI PAS	DNA extract	Poland	Wojsław	50.72	17.35	Short-tailed	target	31353	192.471		ERS17660836	DNA extract	AGR
20	WM061	93573	MRI PAS	DNA extract	Poland	Wojsław	50.72	17.35	Short-tailed	target	27593	165.574		ERS17660837	DNA extract	AGR
21	WM062	93159	MRI PAS	DNA extract	Poland	Ruda Różaniecka	50.32	23.18	Short-tailed	target	30857	186.801		ERS17660838	DNA extract	AGR
22	WM063	93056	MRI PAS	DNA extract	Poland	Ruda Różaniecka	50.32	23.18	Short-tailed	target	36351	227.248		ERS17660839	DNA extract	AGR
23	WM064	88415	MRI PAS	DNA extract	Poland	Kuźnia Raciborska	50.21	18.37	Short-tailed	target	22889	131.754		ERS17660840	DNA extract	AGR
24	WM065	88433	MRI PAS	DNA extract	Poland	Kuźnia Raciborska	50.21	18.37	Short-tailed	target	34670	216.495		ERS17660841	DNA extract	AGR
25	WM066	88078	MRI PAS	DNA extract	Poland	Dyrdy	50.57	18.99	Short-tailed	target	32315	197.32		ERS17660842	DNA extract	AGR
26	WM067	88079	MRI PAS	DNA extract	Poland	Dyrdy	50.57	18.99	Short-tailed	target	3073	16.5235		ERS17660843	DNA extract	AGR
27	WM436	ANB1	MRI PAS	DNA extract	Hungary	Sarmellek	46.42	17.11	Mediterranean	PCR	22501	167.116		ERS17660844	DNA extract	AGR
28	WM071	18-06	MRI PAS	DNA extract	Russia	Kaluga Region, Nogaya	53.33	35.44	Short-tailed	PCR	29664	222.666		ERS17660845	DNA extract	AGR
29	WM074	770	MRI PAS	DNA extract	Ukraine	Ivano-Frankovsk	48.87	24.76	Short-tailed	PCR	27092	213.913		ERS17660846	DNA extract	AGR
30	WM075	8-12	MRI PAS	DNA extract	Russia	Tver Region, Bubonitsy village	56.43	31.00	Short-tailed	PCR	29846	233.884		ERS17660847	DNA extract	AGR
31	WM076	MAM_13042	MRI PAS	DNA extract	Romania	Calimani Mountains - Reţitiş Peak	47.10	25.23	Short-tailed	target	5756	32.0601		ERS17660848	DNA extract	AGR
32	WM077	MAM_13043	MRI PAS	DNA extract	Romania	Calimani Mountains - Reţitiş Peak	47.10	25.23	Short-tailed	target	19823	116.244		ERS17660849	DNA extract	AGR
33	WM078	MAM_13036	MRI PAS	DNA extract	Romania	Calimani Mountains - under "Pietrele Rosii Peak"	47.20	25.20	Short-tailed	target	8359	47.7774		ERS17660850	DNA extract	AGR
34	WM082	ANB32	MRI PAS	DNA extract	Ukraine	Chernobyl district	51.27	30.18	Short-tailed	target	2047	11.1437		ERS17660851	DNA extract	AGR
35	WM215	ANR39	MRI PAS	DNA extract	Russia	Nogaya	53.56	35.74	Short-tailed	target	54905	338.854		ERS17660852	DNA extract	AGR
36	WM323	ES-37	NMS	dry tissue	Spain	Picos de Europa	43.11	-5.00	Mediterranean	target	13976	71.3363		ERS17660853	Genomic Mini, A&A Biotechnology	SPAIN_WM070
37	WM326	ES-42	NMS	dry tissue	Spain	Picos de Europa	43.11	-5.00	Mediterranean	target	7015	35.9343		ERS17660854	Genomic Mini, A&A Biotechnology	SPAIN_WM070
38	WM327	ES-103	NMS	dry tissue	Spain	Burgos	42.31	-3.27	Mediterranean	target	5558	28.7934		ERS17660855	Genomic Mini, A&A Biotechnology	SPAIN_WM070
39	WM328	ES-43	NMS	dry tissue	Spain	Picos de Europa	43.11	-5.00	Mediterranean	target	6145	31.9204		ERS17660856	Genomic Mini, A&A Biotechnology	SPAIN_WM070
40	WM329	ES-44	NMS	dry tissue	Spain	Picos de Europa	43.11	-5.00	Mediterranean	target	5085	26.0182		ERS17660857	Genomic Mini, A&A Biotechnology	SPAIN_WM070
41	WM330	ES-45	NMS	dry tissue	Spain	Picos de Europa	43.11	-5.00	Mediterranean	target	7644	38.87		ERS17660858	Genomic Mini, A&A Biotechnology	SPAIN_WM070
42	WM331	ES-52	NMS	dry tissue	Spain	Picos de Europa	43.11	-5.00	Mediterranean	target	5679	29.518		ERS17660859	Genomic Mini, A&A Biotechnology	SPAIN_WM070
43	WM333	ES-60	NMS	dry tissue	Spain	Picos de Europa	43.11	-5.00	Mediterranean	target	6308	31.9779		ERS17660860	Genomic Mini, A&A Biotechnology	SPAIN_WM070
44	WM336	ES-114	NMS	dry tissue	Spain	Burgos	42.31	-3.27	Mediterranean	target	4456	22.7474		ERS17660861	Genomic Mini, A&A Biotechnology	SPAIN_WM070
45	WM339	ES-122	NMS	dry tissue	Spain	Burgos	42.31	-3.27	Mediterranean	target	3559	17.8835		ERS17660862	Genomic Mini, A&A Biotechnology	SPAIN_WM070
46	WM442	18-100	MRI PAS	DNA extract	Russia	Ust-Ilimsk	57.99	102.75	Short-tailed	shotgun	7884	77.47	0.99	ERS17660863	DNA extract	AGR
47	WM340	AND9	NMS	tissue	Andorra	Tertera Pas Casa	42.58	1.65	Mediterranean	target	32285	167.078		ERS17660864	Genomic Mini, A&A Biotechnology	SPAIN_WM070
48	WM558	82338	MIIZ	dry tissue	Sweden	Vasterbotten	64.77	17.20	Short-tailed	target	28610	137.041	0.999448	ERS17660865	Rohland et al., 2018	AGR
49	WM559	82339	MIIZ	dry tissue	Sweden	n.a.	62.23	15.45	Short-tailed	target	3669	15.8614	0.985089	ERS17660866	Qiagen, DNA blood and tissue kit	AGR
50	WM560	82340	MIIZ	dry tissue	Sweden	Makuberget	67.17	20.64	Short-tailed	target	18212	85.5566	0.999386	ERS17660867	Rohland et al., 2018	AGR
51	WM561	82342	MIIZ	dry tissue	Sweden	Makuberget (Malmberget)?	67.17	20.64	Short-tailed	Shotgun	7909	55.37	0.914156	ERS17660868	Rohland et al., 2018	AGR
52	WM562	82347	MIIZ	dry tissue	Poland	Barszyna	?	?	Short-tailed	Shotgun	6635	51.65	0.922747	ERS17660869	Qiagen, DNA blood and tissue kit	AGR
53	WM563	82360	MIIZ	dry tissue	Austria	Tirol	47.50	12.45	Mediterranean	Shotgun	4611	20.477		ERS17660870	Rohland et al., 2018	SPAIN_WM070
54	WM570	158407	MIIZ	dry tissue	Poland	Bielin Las	52.82	14.45	Short-tailed	target	10255	62.5756	0.99638	ERS17660871	Qiagen, DNA blood and tissue kit	AGR
55	WM574	82361	MIIZ	dry tissue	Germany	Frankenstein	49.79	8.670	Mediterranean	target	2048	10.35		ERS17660872	Qiagen, DNA blood and tissue kit	SPAIN_WM070
56	WM576	82341	MIIZ	dry tissue	Sweden	Dalsland	58.99	12.38	Short-tailed	target	4274	21.4391	0.983371	ERS17660873	Qiagen, DNA blood and tissue kit	AGR
57	WM577	5M.CE.84 (CE2)	CIBIO	dry tissue	Portugal	Viseu	40.82	-8.14	Portuguese	target	3557	25.418		ERS17660874	Qiagen, DNA blood and tissue kit	SPAIN_WM070
58	WM579	SM.LA.105	CIBIO	dry tissue	Portugal	Vila Real	41.54	-7.53	Portuguese	target	11360	104.7		ERS17660875	Qiagen, DNA blood and tissue kit	SPAIN_WM070
59	WM581	SM.SE.199 (QM11)	CIBIO	dry tissue	Portugal	Guarda	40.57	-7.23	Portuguese	target	18430	195.231		ERS17660876	Qiagen, DNA blood and tissue kit	SPAIN_WM070
60	WM582	SM.PL.309	CIBIO	tissue	Portugal	Viana do Castelo	41.64	-8.54	Portuguese	target	3543	23.5947		ERS17660877	Qiagen, DNA blood and tissue kit	SPAIN_WM070
61	WM585	HNHM10961	HNHM	tissue	Hungary	Kis Balaton	46.625596	17.154016	Mediterranean	target	30821	196.236		ERS17660878	Qiagen, DNA blood and tissue kit	SPAIN_WM070
62	WM586	HNHM6320	HNHM	dry tissue	Hungary	Kondorfa	46.892412	16.392251	Mediterranean	target	7999	39.7607		ERS17660879	Qiagen, DNA blood and tissue kit	SPAIN_WM070
63	WM587	HNHM9457	HNHM	dry tissue	Hungary	Ábrahámhegy	46.814284	17.553151	Mediterranean	target	20906	115.672		ERS17660880	Qiagen, DNA blood and tissue kit	SPAIN_WM070
64	WM588	HNHM86.99.1	HNHM	dry tissue	Hungary	Kis Balaton	46.625596	17.154016	Mediterranean	target	20753	113.142		ERS17660881	Qiagen, DNA blood and tissue kit	SPAIN_WM070
65	WM589	HNHM66.225.17	HNHM	dry tissue	Hungary	Nova	46.691943	16.674990	Mediterranean	target	14838	76.6344		ERS17660882	Qiagen, DNA blood and tissue kit	SPAIN_WM070
66	WM590	HNHM74.100.1	HNHM	dry tissue	Hungary	Őriszentpéter	46.845403	16.404067	Mediterranean	target	6299	31.6021		ERS17660883	Qiagen, DNA blood and tissue kit	SPAIN_WM070
67	WM591	HNHM75.84.2	HNHM	dry tissue	Hungary	Őriszentpéter	46.845403	16.404067	Mediterranean	target	30446	185.058		ERS17660884	Qiagen, DNA blood and tissue kit	SPAIN_WM070
68	WM593	HNHM9279	HNHM	dry tissue	Hungary	Lipótfa	46.282273	17.669459	Mediterranean	target	25869	156.545		ERS17660885	Qiagen, DNA blood and tissue kit	SPAIN_WM070
69	XJ160	ENA database	ENA database	ENA database	China	plateau	n.a.	n.a.	Short-tailed	Shotgun	32405	197.64	1	SAMN12754815	n.a.	AGR
70	FV396	ENA database	ENA database	ENA database	Great Britain	Kielder Forest	55.257231	-2.598048	Short-tailed	Shotgun	57669	467.91	1	SAMN03863806	n.a.	AGR
*	MRI PAS - Mammal Research Institute Polish Academy of Sciences
	HNHM - Hungarian Natural History Museum
	NMS - National Museums Scotland
	CIBIO - Centro de Investigação em Biodiversidade e Recursos Genéticos
	MIIZ - Museum and Institute of Zoology Polish Academy of Sciences
	mtDNA references used in this study may be downloaded from RepOD respoitory doi: https://doi.org/10.18150/DNEO1W

## Sheet: Tab. S3 ChrXY contigs
	Table S3. List of contigs identified in field vole reference genome as linked to chromosomes X or Y
	The putative X and Y linked contigs identifeid in the field vole reference genome by at least two out of three methods:
	1. alignment to Chionomys nivalis X/Y chromosomes using satsuma
	2. blasting versus C. nivalis X and Y chromosomes
	3. ratio of mapped reads
	Putative X linked contigs	Putative Y linked contigs
	CADCXT010000125.1	CADCXT010001194.1
	CADCXT010000142.1	CADCXT010001204.1
	CADCXT010000227.1	CADCXT010001561.1
	CADCXT010000517.1	CADCXT010002085.1
	CADCXT010000527.1	CADCXT010002489.1
	CADCXT010000538.1	CADCXT010002557.1
	CADCXT010000560.1	CADCXT010002562.1
	CADCXT010000581.1	CADCXT010002784.1
	CADCXT010000585.1	CADCXT010003290.1
	CADCXT010000599.1	CADCXT010003345.1
	CADCXT010000604.1	CADCXT010003412.1
	CADCXT010000610.1	CADCXT010004333.1
	CADCXT010000618.1	CADCXT010005053.1
	CADCXT010000674.1	CADCXT010005118.1
	CADCXT010000677.1	CADCXT010006549.1
	CADCXT010000713.1
	CADCXT010000721.1
	CADCXT010000732.1
	CADCXT010000739.1
	CADCXT010000752.1
	CADCXT010000760.1
	CADCXT010000771.1
	CADCXT010000783.1
	CADCXT010000786.1
	CADCXT010000788.1
	CADCXT010000820.1
	CADCXT010000834.1
	CADCXT010000847.1
	CADCXT010000856.1
	CADCXT010000928.1
	CADCXT010000952.1
	CADCXT010000966.1
	CADCXT010001034.1
	CADCXT010001047.1
	CADCXT010001062.1
	CADCXT010001066.1
	CADCXT010001098.1
	CADCXT010001118.1
	CADCXT010001125.1
	CADCXT010001141.1
	CADCXT010001149.1
	CADCXT010001164.1
	CADCXT010001205.1
	CADCXT010001219.1
	CADCXT010001249.1
	CADCXT010001272.1
	CADCXT010001326.1
	CADCXT010001356.1
	CADCXT010001367.1
	CADCXT010001401.1
	CADCXT010001421.1
	CADCXT010001424.1
	CADCXT010001456.1
	CADCXT010001476.1
	CADCXT010001493.1
	CADCXT010001521.1
	CADCXT010001588.1
	CADCXT010001596.1
	CADCXT010001633.1
	CADCXT010001639.1
	CADCXT010001668.1
	CADCXT010001685.1
	CADCXT010001798.1
	CADCXT010001883.1
	CADCXT010001954.1
	CADCXT010002021.1
	CADCXT010002028.1
	CADCXT010002029.1
	CADCXT010002030.1
	CADCXT010002039.1
	CADCXT010002084.1
	CADCXT010002098.1
	CADCXT010002099.1
	CADCXT010002157.1
	CADCXT010002163.1
	CADCXT010002173.1
	CADCXT010002194.1
	CADCXT010002195.1
	CADCXT010002224.1
	CADCXT010002275.1
	CADCXT010002281.1
	CADCXT010002294.1
	CADCXT010002298.1
	CADCXT010002305.1
	CADCXT010002331.1
	CADCXT010002353.1
	CADCXT010002354.1
	CADCXT010002358.1
	CADCXT010002367.1
	CADCXT010002426.1
	CADCXT010002445.1
	CADCXT010002454.1
	CADCXT010002457.1
	CADCXT010002468.1
	CADCXT010002474.1
	CADCXT010002486.1
	CADCXT010002550.1
	CADCXT010002564.1
	CADCXT010002592.1
	CADCXT010002594.1
	CADCXT010002606.1
	CADCXT010002607.1
	CADCXT010002617.1
	CADCXT010002629.1
	CADCXT010002639.1
	CADCXT010002698.1
	CADCXT010002703.1
	CADCXT010002716.1
	CADCXT010002729.1
	CADCXT010002730.1
	CADCXT010002763.1
	CADCXT010002786.1
	CADCXT010002834.1
	CADCXT010002840.1
	CADCXT010002906.1
	CADCXT010002964.1
	CADCXT010002980.1
	CADCXT010002982.1
	CADCXT010002993.1
	CADCXT010003015.1
	CADCXT010003028.1
	CADCXT010003031.1
	CADCXT010003055.1
	CADCXT010003108.1
	CADCXT010003113.1
	CADCXT010003127.1
	CADCXT010003131.1
	CADCXT010003134.1
	CADCXT010003135.1
	CADCXT010003150.1
	CADCXT010003234.1
	CADCXT010003261.1
	CADCXT010003267.1
	CADCXT010003268.1
	CADCXT010003274.1
	CADCXT010003279.1
	CADCXT010003297.1
	CADCXT010003330.1
	CADCXT010003364.1
	CADCXT010003385.1
	CADCXT010003388.1
	CADCXT010003393.1
	CADCXT010003407.1
	CADCXT010003412.1
	CADCXT010003449.1
	CADCXT010003480.1
	CADCXT010003496.1
	CADCXT010003503.1
	CADCXT010003546.1
	CADCXT010003558.1
	CADCXT010003569.1
	CADCXT010003623.1
	CADCXT010003633.1
	CADCXT010003694.1
	CADCXT010003716.1
	CADCXT010003718.1
	CADCXT010003719.1
	CADCXT010003753.1
	CADCXT010003757.1
	CADCXT010003779.1
	CADCXT010003792.1
	CADCXT010003858.1
	CADCXT010003886.1
	CADCXT010003905.1
	CADCXT010003921.1
	CADCXT010003941.1
	CADCXT010003983.1
	CADCXT010003988.1
	CADCXT010004036.1
	CADCXT010004039.1
	CADCXT010004040.1
	CADCXT010004053.1
	CADCXT010004139.1
	CADCXT010004155.1
	CADCXT010004156.1
	CADCXT010004157.1
	CADCXT010004186.1
	CADCXT010004213.1
	CADCXT010004215.1
	CADCXT010004246.1
	CADCXT010004264.1
	CADCXT010004322.1
	CADCXT010004352.1
	CADCXT010004364.1
	CADCXT010004385.1
	CADCXT010004448.1
	CADCXT010004475.1
	CADCXT010004485.1
	CADCXT010004492.1
	CADCXT010004501.1
	CADCXT010004543.1
	CADCXT010004640.1
	CADCXT010004656.1
	CADCXT010004688.1
	CADCXT010004724.1
	CADCXT010004732.1
	CADCXT010004769.1
	CADCXT010004773.1
	CADCXT010004795.1
	CADCXT010004822.1
	CADCXT010004926.1
	CADCXT010004952.1
	CADCXT010005005.1
	CADCXT010005058.1
	CADCXT010005068.1
	CADCXT010005090.1
	CADCXT010005179.1
	CADCXT010005220.1
	CADCXT010005231.1
	CADCXT010005304.1
	CADCXT010005327.1
	CADCXT010005335.1
	CADCXT010005343.1
	CADCXT010005353.1
	CADCXT010005392.1
	CADCXT010005479.1
	CADCXT010005515.1
	CADCXT010005576.1
	CADCXT010005634.1
	CADCXT010005712.1
	CADCXT010005856.1
	CADCXT010005891.1
	CADCXT010005913.1
	CADCXT010005939.1
	CADCXT010005984.1
	CADCXT010005990.1
	CADCXT010005999.1
	CADCXT010006047.1
	CADCXT010006077.1
	CADCXT010006180.1
	CADCXT010006225.1
	CADCXT010006296.1
	CADCXT010006318.1
	CADCXT010006446.1
	CADCXT010006454.1
	CADCXT010006591.1
	CADCXT010006621.1
	CADCXT010006626.1
	CADCXT010006661.1
	CADCXT010006693.1
	CADCXT010006726.1
	CADCXT010006838.1
	CADCXT010006888.1
	CADCXT010006935.1
	CADCXT010006948.1
	CADCXT010006966.1
	CADCXT010006970.1
	CADCXT010006974.1
	CADCXT010006975.1
	CADCXT010001007.1
	CADCXT010002309.1
	CADCXT010002438.1
	CADCXT010003589.1

## Sheet: Tab. S4 mtDNA parts
	Table S4. The best partitioning scheme of mitochondrial DNA
	The best partitioning scheme of mitochondrial DNA and DNA substitution models identified by PartitionFinder2
	No	Model	No. sites	Partitions
	1	HKY+I+G+X	4099	13516–14036\3, 68–1014, 1085–2643, 1–67, 1015–1084, 2644–2719, 3677–3744, 3745–3812, 3814–3882, 4918–4986, 4987–5055, 5058–5127, 5158–5226, 5227–5293, 6840–6906, 7665–7728 9354–9421
	2	K80+I+G	1803	5295–6839\3, 2720–3676\3, 8573–9353\3, 14112–15254\3, 6978–7661\3, 9840–10136\3
	3	TRN+I+X	2170	11705–13515\3, 3884–4917\3, 7730–7932\3, 2721–3676\3, 8571–9353\3, 10137–11507\3, 9423–9769\3
	4	GTR+G+X	3779	10138–11507\3, 11706–13515\3, 2722–3676\3, 8572–9353\3, 3885–4917\3, 14114–15254\3, 9842–10136\3, 9424–9769\3, 5297–6839\3, 7934–8570\3, 6980–7661\3, 13518–14036\3, 7731–7932\3
	5	HKY+I+G+X	1016	3813–3813, 5056–5057, 5128–5157, 5294–5294, 6907–6908, 6909–6977, 7662–7664, 9839–9839, 14106–14111, 15255–15255, 15379–1627
	6	HKY+I+G+X	1975	13517–14036\3, 7729–7932\3, 9422–9769\3, 7935–8570\3, 3883–4917\3, 11707–13515\3, 10139–11507\3
	7	HKY+X	1436	6979–7661\3, 9841–10136\3, 7933–8570\3, 14113–15254\3, 5296–6839\3

## Sheet: Tab. S5 ancient genomes
	Table S5. Nuclear genome mapping statistics for ancient samples
Sample	Species	Locality	Sample accession	USER	total reads	Microtus agrestis reference genome							MicOch1.0 reference genome
						total mapped reads	total duplicates	unique mapped reads >30bp	Fraction endogenous	Fraction duplicated	mean genome coverage	mean genome coverage SD	total mapped reads	total duplicates	unique mapped reads >30bp	Fraction endogenous	Fraction duplicated	mean genome coverage	mean genome coverage SD
MI058	M. agrestis	Russia	ERS17660740	partial	188813757	27496418	6908399	20588019	0.109039	0.251247	0.5905	1.1325	20636684	5360088	15276596	0.0809083	0.259736	0.42	1.88
MI096	M. agrestis	Poland	ERS17660745	partial	233601743	11928379	1338856	10589523	0.0453315	0.112241	0.3	0.69	8979706	1072947	7906759	0.0338472	0.119486	0.22	1.3
MI1081	M. agrestis	Poland	ERS17660752	partial	264586269	66651722	18531105	48120617	0.181871	0.278029	1	1.54	54723506	15767487	38956019	0.147234	0.28813	0.79	2.8
MI2950	M. lavernedi	Italy	ERS17660776	partial	360557517	48330289	14917500	33412789	0.0926698	0.308657	0.57	1.41	41598108	13866955	27731153	0.0769119	0.333355	0.46	2.56
MI3071	M. rozianus	Spain	ERS17660781	partial	396693254	73541506	38075315	35466191	0.0894046	0.517739	0.5807	1.5	62441553	33185773	29253129	0.0737424	0.531512	0.44	2.7
MI3076	M. agrestis	Poland	ERS17660785	partial	505955805	286879475	141262057	145617418	0.287807	0.492409	2.54	3.29	267473668	147540247	119933421	0.237043	0.551607	2.26	6.43
MI375	M. agrestis	Poland	ERS17660796	partial	233064819	59208391	26426219	32782172	0.140657	0.446326	0.9675	1.5695	44091826	19847675	24244151	0.104023	0.450144	0.69	2.73
MI377	M. agrestis	Poland	ERS17660797	partial	236188526	112624162	23327298	89296864	0.378075	0.21	2.5655	3.7523	84270159	18183254	66086905	0.279806	0.215773	1.84	5.07
MI605	M. lavernedi	Italy	ERS17660800	partial	261636590	48106256	23877162	24229094	0.0926059	0.496342	0.36	1	41883633	21806948	20076685	0.076735	0.520656	0.3	1.52
MI711	M. rozianus	Spain	ERS17660804	partial	322026294	90080662	12362522	77718140	0.241341	0.137238	2.408	6.059	69156367	10538288	58618079	0.182029	0.152383	1.76	7.37
MI722	M. rozianus	Spain	ERS17660807	partial	203991877	22024058	5514308	16509750	0.0809334	0.250377	0.47	1.66	17140811	4415864	12724947	0.0623797	0.257623	0.35	2.4
MI894	M. agrestis	Poland	ERS17660808	partial	234848955	78105497	31905483	46200014	0.196722	0.408492	1.3256	2.0679	58492146	24156062	34336084	0.146205	0.41298	0.96	3.37

## Sheet: Tab. S6 modern genomes
Table S6. Nuclear genome mapping statistics for modern samples
Sample	Species	Location	BioProject	Sample accession	Sequencing reads	Microtus agrestis reference genome					MicOch1.0 reference genome
						total mapped reads	total duplicates	unique mapped reads	mean genome coverage	mean genome coverage SD	total mapped reads	total duplicates	unique mapped reads	mean genome coverage	mean genome coverage SD
XJ160	M. agrestis	China	PRJNA564473	SAMN12754815	258200774	187159296	11267423	175891873	8.84	5.92	187748046	19703574	168044472	7.65	10.23
FV396	M. agrestis	United Kingdom	PRJNA290426	SAMN03863806	319961892	491742907	3680719	488062188	21	31.9	482744214	22206773	460537441	18.46	143.79
WM009	M. agrestis	Poland	PRJEB67915	ERS17660821	314784287	451071756	49754773	401316983	30.34	48.4	482919005	60104144	422814861	26.34	140.9
WM056	M. agrestis	Great Britain	PRJEB67915	ERS17660832	69469078	68245206	5717956	62527250	3.29	4.02	70078739	6806552	63272187	2.89	13.07
WM329	M. lavernedii	Spain	PRJEB67915	ERS17660857	73213839	80605857	8815709	71790148	6.01	20.19	87096629	11097575	75999054	5.28	52.19
WM330	M. lavernedii	Spain	PRJEB67915	ERS17660858	541039701	548675522	107444768	441230754	36.84	123	669191350	153095438	516095912	32.12	519.55
WM340	M. lavernedii	Andora	PRJEB67915	ERS17660864	324480756	233109567	53238352	179871215	21.14	37.85	336708963	60574341	276134622	18.61	100.46
WM441	M. agrestis	Norway	PRJEB67915	ERS17660823	200891858	163632689	25676804	137955885	12.41	15.45	178813256	28535338	150277918	10.71	31.4
WM442	M. agrestis	Russia	PRJEB67915	ERS17660863	109747044	96192839	11755235	84437604	6.92	8.16	103318970	13199317	90119653	6.12	16.66
WM436	M. lavernedii	Hungary	PRJEB67915	ERS17660844	152298594	200734308	15139798	185594510	5.7	13.9	203794130	18050881	185743249	5.02	35.42
WM561	M. agrestis	Sweden	PRJEB67915	ERS17660868	81751447	58243437	9033938	49209499	2.62	3.2	60552175	9081148	51471027	2.25	3.44
WM562	M. agrestis	Poland	PRJEB67915	ERS17660869	118730512	80913950	15985441	64928509	4.58	4.59	90357690	17247656	73110034	3.99	6.17
WM563	M. agrestis	Austria	PRJEB67915	ERS17660870	58379764	29435001	21973384	7461617	0.73	1.28	45454489	26367652	19086837	0.61	1.72
WM579	M. rozianus	Portugal	PRJEB67915	ERS17660875	397534714	398046333	64557216	333489117	29.57	84.9	458492165	79662259	378829906	26.4	162.45
WM580	M. rozianus	Portugal	PRJEB67915	ERS17697867	91833089	89122039	9953933	79168106	6.61	21.16	97846119	12465176	85380943	5.94	41.6
WM581	M. rozianus	Portugal	PRJEB67915	ERS17660876	328696543	346323537	44060976	302262561	25.58	80	386405249	56632473	329772776	22.8	154.42
WM007	Microtus tatricus	Poland	PRJEB67915	ERS17697868	135251816	153806900	18555084	152651475	10.67	32.44	171151297	19186726	151964571	10.36	37.9
WM490	Microtus socialis	Iran	PRJEB67915	ERS17697869	654332251	758886528	124486776	634399752	42.58	42.45	756517002	127622780	628894222	41.18	53.5
WM492	Microtus subterraneus	Czech Republic	PRJEB67915	ERS17697870	596609407	840011691	138386178	701625513	45.15	30.46	935259943	125662951	809596992	43.53	39.04

## Sheet: Tab. S7 14C
Table S7. Details of direct radiocarbon dates
No	MPI EVA Lab ID	CeNT Lab ID	Country	approx AGE	Site	Layer	Sampled for 14C (mg)	Collagen yield (mg)	Collagen yield (%)	δ13C	δ15N	C%	N%	CN	14C method	AMS lab code	C14 age BP	error	95% cal BP		Mediana
																			from	to
1	R-EVA-3486	MI057	Russia	Holocene	Mironovskaya III	Layer 6, Horizon 21	48.8	3.6	7.4	-22.0828	4.28946	43.0608	14.8186	3.38876	graphite	ETH-105984	3344.28	14.4239	3630	3490	3560
2	R-EVA-3490	MI095	Poland	10-12 ka BP	Jaskinia nad Tunelem	Warstwa siwa	75.2	4.6	6.1	-23.1844	4.01196	41.3602	14.5346	3.31853	graphite	ETH-105988	10144.7	21.7003	11930	11650	11780
3	R-EVA-3491	MI096	Poland	10-12 ka BP	Jaskinia nad Tunelem	Warstwa siwa	119.8	6.8	5.7	-23.9058	6.47013	41.918	14.5381	3.36248	graphite	ETH-105989	8941.57	19.9285	10200	9920	10090
4	R-EVA-3493	MI606	Italy	20-27 ka BP	Grotta del Sambuco	6(6-7)	105.1	4.9	4.7	-20.989	6.905	41.638	14.1733	3.42598	graphite	ETH-105990	22390	60	26970	26420	26730
5	R-EVA-3495	MI722	Spain	15-20 ka BP	Valdavara 1	5	40.2	1.7	4.2	-21.747	3.64	43.2519	14.9484	3.37424	graphite	ETH-110545	15232.1	44.3933	18690	18290	18440
6	R-EVA-3010	MI377	Czechia	12,3 ka BP	Byci	8c	51.9	3.2	6.69456	-22.499	4.257	42.5464	13.7983	3.59737	CO2	Aix-12037	11224	70	13300	13000	13140
7	R-EVA-3011	MI900	Poland	Holocene	Shelter III in Smoleń	2	40.4	2.1	4.04624	-23.934	2.771	40.447	14.2388	3.31406	CO2	Aix-12039	11907	71	14020	13600	13770
8	R-EVA-3012	MI1027	Poland	Holocene	Shelter III in Smoleń	8	47.8	3	6.99301	-21.919	1.062	39.9401	13.9583	3.3383	CO2	Aix-12035	12565	75	15200	14360	14910
9	R-EVA-3013	MI905	Poland	Holocene	Shelter III in Smoleń	3	28.5	1.4	3.46535	-22.247	2.248	41.0511	14.7507	3.24683	CO2	Aix-12036	10433	64	12620	12000	12320
10	R-EVA-3014	MI908	Poland	Holocene	Shelter III in Smoleń	5a	42.9	1.8	6.31579	-22.677	2.461	41.4338	14.1686	3.41173	CO2	Aix-12038	10475	66	12680	12100	12460

## Sheet: Tab. S8 BETS
	Table S8. Results of the Bayesian evaluation of temporal signals
	Model I has the highest log-likelihood
	ID	Description	logML	mean logML
	Model I	Tips; strict clock. CTMC rate prior, constant pop size	-44045	-44046
			-44046
	Model II	Tips; UCLN clock. CTMC rate prior, constant pop size	-44127	-44126
			-44126
	Model III	No tips; strict clock, constant pop size	-45154	-45154
			-45154
	Model IV	No tips; UCLN clock, constant pop size	-44256	-44257
			-44257

## Sheet: Tab. S9 Dstat_tree
P1	P2	P3	Dstatistic	Z-score	p-value	f4-ratio	BBAA	ABBA	BABA
MI375	FV396	WM330	0.0677884	20.5883	2.3e-16	0.0274041	67095	28684	25042
MI375	FV396	WM340	0.0799355	18.698	2.3e-16	0.0343763	66456	29479	25115
MI375	FV396	WM436	0.0583384	17.2261	2.3e-16	0.026496	67115	28491	25350
FV396	WM441	MI375	0.0123918	3.24946	0.00115625	0.010639	40061	34967	34111
MI375	FV396	WM442	0.0126005	3.25225	0.00114495	0.00758538	38553	35520	34636
MI375	FV396	WM561	0.0109605	2.98952	0.00279415	0.00693342	37354	35465	34696
MI375	FV396	WM562	0.0160571	3.89918	9.65197e-05	0.0103426	38231	35562	34438
WM563	FV396	MI375	0.0739992	14.8573	2.3e-16	0.0593167	31494	30290	26116
MI375	FV396	WM579	0.0418824	8.82389	2.3e-16	0.0121371	90072	19416	17855
MI375	FV396	WM580	0.0397881	7.3736	1.66089e-13	0.0116001	89906	19430	17943
MI375	FV396	WM581	0.0384904	7.54677	4.4631e-14	0.0111943	89962	19372	17936
MI375	FV396	XJ160	0.00648282	1.35476	0.175495	0.00392599	38800	35165	34712
MI377	FV396	MI605	0.0252141	4.39913	1.08687e-05	0.0125154	51426	14902	14169
FV396	MI377	MI711	0.0119544	2.74878	0.00598177	0.00362467	99576	19893	19423
FV396	MI377	MI722	0.0225407	4.48642	7.24296e-06	0.00708367	75467	14698	14050
MI894	MI377	FV396	0.0310554	5.62813	1.82169e-08	0.0219583	34440	38330	36021
MI377	FV396	WM009	0.0242126	5.58712	2.30864e-08	0.0152198	44373	39086	37238
WM056	FV396	MI377	0.0166986	3.19857	0.00138111	0.0129798	51475	35009	33859
MI377	FV396	WM329	0.0584136	21.6866	2.3e-16	0.023317	76017	30830	27427
MI377	FV396	WM330	0.0577997	21.5755	2.3e-16	0.0230136	75890	30874	27500
MI377	FV396	WM340	0.068962	23.7758	2.3e-16	0.0291976	75104	31668	27582
MI377	FV396	WM436	0.0488856	14.0911	2.3e-16	0.0219489	75945	30800	27929
FV396	WM441	MI377	0.0114771	3.18128	0.00146628	0.0101418	42753	39350	38457
MI377	FV396	WM442	0.0126143	3.82018	0.000133355	0.00744276	44236	38492	37533
MI377	FV396	WM561	0.0148716	4.99476	5.89083e-07	0.00918602	43118	38557	37427
MI377	FV396	WM562	0.019065	7.87705	3.33067e-15	0.0120472	44163	38833	37380
WM563	FV396	MI377	0.0770749	20.2322	2.3e-16	0.0632318	33733	34377	29457
MI377	FV396	WM579	0.0253165	6.29491	3.07581e-10	0.00722219	101827	20817	19789
MI377	FV396	WM580	0.0241427	4.9922	5.96947e-07	0.00690627	101565	20786	19806
MI377	FV396	WM581	0.0222726	5.39991	6.66762e-08	0.0063588	101731	20723	19820
MI377	FV396	XJ160	0.0128837	3.63942	0.00027325	0.00761094	44764	38326	37351
MI605	FV396	MI711	0.0619415	17.1063	2.3e-16	0.0286586	29162	19013	16795
MI605	FV396	MI722	0.0521487	8.61096	2.3e-16	0.0252322	20933	13074	11778
MI894	FV396	MI605	0.0389161	7.4863	7.08322e-14	0.0193264	47713	14416	13336
WM009	FV396	MI605	0.0414274	7.2123	5.50227e-13	0.0214171	50443	16139	14855
WM056	FV396	MI605	0.0122183	2.44412	0.0145205	0.00571448	60173	13835	13501
MI605	WM329	FV396	0.235944	41.9266	2.3e-16	0.103444	30985	27336	16899
MI605	WM330	FV396	0.236715	47.0383	2.3e-16	0.104043	31117	27486	16964
MI605	WM340	FV396	0.258154	63.4844	2.3e-16	0.113092	31055	27870	16433
MI605	WM436	FV396	0.23566	48.3169	2.3e-16	0.103423	30987	27402	16950
WM441	FV396	MI605	0.0257997	4.29811	1.72261e-05	0.0127771	54799	15089	14330
WM442	FV396	MI605	0.0294973	6.45239	1.10103e-10	0.0154978	50013	16107	15184
WM561	FV396	MI605	0.0317553	4.62106	3.81787e-06	0.016523	49990	15823	14849
WM562	FV396	MI605	0.0277849	4.91143	9.0415e-07	0.0145362	49978	15980	15116
WM563	FV396	MI605	0.0143834	2.06144	0.0392614	0.00740899	41606	12236	11889
MI605	FV396	WM579	0.0795467	18.3143	2.3e-16	0.0346404	30126	20099	17137
MI605	FV396	WM580	0.0803237	16.9063	2.3e-16	0.035154	30019	20161	17163
MI605	FV396	WM581	0.0793258	17.5124	2.3e-16	0.0345494	30098	20076	17125
XJ160	FV396	MI605	0.0325418	7.00563	2.45892e-12	0.0171185	49754	16198	15177
MI722	MI711	FV396	0.0538482	6.82686	8.67928e-12	0.00584816	71671	8024	7204
FV396	MI894	MI711	0.000991391	0.140009	0.888653	0.00030721	93315	19184	19146
WM009	FV396	MI711	0.00324575	0.650948	0.51508	0.00104348	97112	21173	21036
WM056	FV396	MI711	0.0149467	3.07715	0.00208991	0.00417439	115400	18504	17959
FV396	WM329	MI711	0.0631633	9.365	2.3e-16	0.0280031	63181	30853	27187
FV396	WM330	MI711	0.0601117	8.48601	2.3e-16	0.0264988	63489	30642	27167
FV396	WM340	MI711	0.00625045	1.29531	0.195212	0.00263812	65461	27851	27505
WM436	FV396	MI711	0.0394635	14.9949	2.3e-16	0.0165166	65090	28987	26786
WM441	FV396	MI711	0.000100949	0.0214857	0.982858	3.0509e-05	105254	19814	19810
FV396	WM442	MI711	0.00731448	1.59716	0.110229	0.00235698	96355	21277	20968
FV396	WM561	MI711	0.00186112	0.320346	0.748706	0.000593353	96504	20725	20648
FV396	WM562	MI711	0.00404261	0.695541	0.486717	0.00129797	96708	21111	20941
WM563	FV396	MI711	0.0333889	6.43981	1.1962e-10	0.0105161	83830	17657	16516
MI711	WM579	FV396	0.0150509	2.42732	0.015211	0.00156651	105595	10015	9718
MI711	WM580	FV396	0.0228718	3.43839	0.000585174	0.00235453	105698	9973	9527
MI711	WM581	FV396	0.0125379	2.29525	0.0217188	0.00130818	105662	10014	9766
FV396	XJ160	MI711	0.000259967	0.0456259	0.963608	8.3908e-05	95889	21162	21151
FV396	MI894	MI722	0.0117993	1.70557	0.088089	0.00378775	70529	14106	13777
WM009	FV396	MI722	0.00808153	1.52927	0.126196	0.00268125	74017	15530	15281
WM056	FV396	MI722	0.00839517	1.48652	0.137142	0.00243571	87243	13453	13229
FV396	WM329	MI722	0.0584217	7.9329	2.22045e-15	0.0266458	48242	22311	19848
FV396	WM330	MI722	0.0593144	8.04527	8.88178e-16	0.0270174	48593	22342	19840
FV396	WM340	MI722	0.00873146	1.42859	0.153123	0.00380068	49927	20333	19981
WM436	FV396	MI722	0.0368359	12.3196	2.3e-16	0.0160136	49834	21195	19689
FV396	WM441	MI722	0.00314498	0.615927	0.537943	0.000982934	79913	14513	14422
FV396	WM442	MI722	0.0122386	3.13476	0.00171997	0.00408296	73456	15632	15254
FV396	WM561	MI722	0.0125381	2.17753	0.0294408	0.00412547	73389	15263	14885
FV396	WM562	MI722	0.0136265	2.10818	0.0350152	0.00453046	73535	15584	15165
WM563	FV396	MI722	0.0254333	4.24033	2.23188e-05	0.00832582	63007	12660	12032
MI722	WM579	FV396	0.0646028	10.6516	2.3e-16	0.00776478	74354	9113	8007
MI722	WM580	FV396	0.0713525	9.87729	2.3e-16	0.0084744	74227	9054	7848
MI722	WM581	FV396	0.0630673	8.78573	2.3e-16	0.00746337	74612	8959	7896
FV396	XJ160	MI722	0.00515514	1.01211	0.311486	0.00171775	73066	15501	15342
MI894	FV396	WM009	0.0317979	4.55368	5.2715e-06	0.0201773	40976	38192	35838
WM056	FV396	MI894	0.0164233	3.4116	0.000645829	0.0125082	50983	32894	31831
MI894	FV396	WM329	0.075624	16.2614	2.3e-16	0.0303873	71266	30381	26109
MI894	FV396	WM330	0.07177	18.1889	2.3e-16	0.028751	70994	30270	26216
MI894	FV396	WM340	0.0844785	20.3589	2.3e-16	0.035947	70214	31092	26248
MI894	FV396	WM436	0.0632734	18.0898	2.3e-16	0.0286325	71098	30290	26685
FV396	WM441	MI894	0.0104898	2.56064	0.0104479	0.00909995	42625	37039	36270
MI894	FV396	WM442	0.0214495	4.31955	1.56347e-05	0.0127797	40983	37716	36132
MI894	FV396	WM561	0.0192698	2.83268	0.00461602	0.0120704	39762	37661	36237
MI894	FV396	WM562	0.0282172	4.75976	1.93822e-06	0.0179086	40760	37897	35817
WM563	FV396	MI894	0.0775602	16.964	2.3e-16	0.0622654	33581	32267	27622
MI894	FV396	WM579	0.0373473	6.66079	2.72355e-11	0.01085	95515	20554	19074
MI894	FV396	WM580	0.0382621	6.56577	5.17661e-11	0.0111202	95254	20528	19015
MI894	FV396	WM581	0.0368117	7.54584	4.4853e-14	0.0106548	95439	20448	18996
MI894	FV396	XJ160	0.0157347	3.19642	0.00139144	0.00943773	41311	37409	36250
WM056	FV396	WM009	0.00940708	2.5473	0.0108559	0.00544717	57239	35249	34592
WM009	FV396	WM329	0.0570188	16.8413	2.3e-16	0.0240101	73250	32868	29322
WM009	FV396	WM330	0.0542002	21.4679	2.3e-16	0.0227953	73054	32861	29482
WM009	FV396	WM340	0.0599631	16.0219	2.3e-16	0.0269212	72190	33595	29794
WM009	FV396	WM436	0.0515431	15.2205	2.3e-16	0.0244331	73393	33050	29810
FV396	WM441	WM009	0.0483084	10.6914	2.3e-16	0.0313674	47055	41133	37342
WM442	WM009	FV396	0.00748798	2.16396	0.0304676	0.00409493	63192	31955	31480
WM009	WM561	FV396	0.0109321	2.50744	0.012161	0.00638311	58396	33799	33068
WM562	WM009	FV396	0.000995836	0.197009	0.843821	0.000571438	60292	33171	33105
WM563	FV396	WM009	0.0490782	13.6606	2.3e-16	0.0308844	37973	34169	30972
FV396	WM009	WM579	0.00109935	0.214496	0.83016	0.000335789	98460	21855	21807
FV396	WM009	WM580	0.000639415	0.12374	0.901521	0.000196409	98320	21909	21881
FV396	WM009	WM581	0.00415734	0.971217	0.33144	0.00127496	98480	21980	21798
XJ160	WM009	FV396	0.0179437	4.19744	2.69945e-05	0.00993213	62082	32875	31716
WM056	FV396	WM329	0.0137606	2.757	0.00583342	0.00524573	89707	27774	27020
WM056	FV396	WM330	0.0102616	2.16451	0.0304249	0.00390422	89556	27714	27151
WM056	FV396	WM340	0.0220334	5.07624	3.84979e-07	0.00893896	88758	28504	27275
WM056	FV396	WM436	0.0117109	3.32134	0.000895856	0.00500186	89786	27861	27216
WM056	FV396	WM441	0.00854452	1.64679	0.0996018	0.00601132	50463	38125	37479
WM056	FV396	WM442	0.00767322	1.75325	0.0795586	0.00414915	57563	35129	34594
WM056	FV396	WM561	0.00730535	1.49015	0.136185	0.00414283	56203	35092	34583
WM056	FV396	WM562	0.00202142	0.478243	0.632477	0.00117743	56987	34947	34806
WM056	FV396	WM563	0.0136604	2.97465	0.00293323	0.0104551	44183	29756	28954
WM056	FV396	WM579	0.0168357	3.63611	0.000276787	0.00448846	117265	19297	18658
WM056	FV396	WM580	0.0180332	3.14811	0.00164331	0.0048168	117055	19307	18623
WM056	FV396	WM581	0.0162245	3.10399	0.00190933	0.00431886	117220	19229	18615
WM056	FV396	XJ160	0.00798014	1.51331	0.130201	0.00431448	58084	34925	34372
WM329	WM330	FV396	0.00492685	0.885447	0.375916	0.00167613	90492	26618	26357
WM329	WM340	FV396	0.0308279	7.20073	5.98854e-13	0.011886	78763	30947	29096
WM329	WM436	FV396	0.00137881	0.351931	0.72489	0.000584735	70526	33045	32954
WM441	FV396	WM329	0.0310521	8.15905	4.44089e-16	0.0125678	80514	30448	28614
WM442	FV396	WM329	0.0522394	13.6666	2.3e-16	0.0220783	72627	32762	29509
WM561	FV396	WM329	0.057873	10.6371	2.3e-16	0.0242786	73222	32473	28920
WM562	FV396	WM329	0.0558589	13.7537	2.3e-16	0.0235929	73139	32871	29393
WM563	FV396	WM329	0.0258017	4.78532	1.70712e-06	0.0110587	63804	26518	25184
FV396	WM329	WM579	0.0692321	11.2599	2.3e-16	0.0291273	64049	32093	27937
FV396	WM329	WM580	0.0689822	9.24296	2.3e-16	0.0290304	63819	32008	27877
FV396	WM329	WM581	0.0673765	10.1727	2.3e-16	0.0283316	64077	31977	27940
XJ160	FV396	WM329	0.0640613	17.3279	2.3e-16	0.0270285	72467	33245	29242
WM330	WM340	FV396	0.0263306	7.20224	5.92415e-13	0.0102475	78639	31105	29509
WM436	WM330	FV396	0.00264686	0.676601	0.498659	0.00112952	70764	33335	33159
WM441	FV396	WM330	0.0336699	10.49	2.3e-16	0.0135642	80461	30562	28571
WM442	FV396	WM330	0.0531653	17.2767	2.3e-16	0.0224402	72618	32923	29599
WM561	FV396	WM330	0.0549657	18.022	2.3e-16	0.0230475	73074	32494	29108
WM562	FV396	WM330	0.0579536	17.282	2.3e-16	0.0243666	73057	32978	29365
WM563	FV396	WM330	0.0267569	5.27622	1.31873e-07	0.0113618	63549	26401	25025
FV396	WM330	WM579	0.0661972	9.7038	2.3e-16	0.0277543	64438	31947	27980
FV396	WM330	WM580	0.0649841	8.96005	2.3e-16	0.0272754	64262	31859	27971
FV396	WM330	WM581	0.0668938	10.3258	2.3e-16	0.0280586	64420	31938	27933
XJ160	FV396	WM330	0.0651035	22.9686	2.3e-16	0.0274509	72457	33432	29345
WM436	WM340	FV396	0.0271236	10.7535	2.3e-16	0.0114038	71463	33646	31869
WM441	FV396	WM340	0.0394085	11.6789	2.3e-16	0.0168988	79437	31136	28775
WM442	FV396	WM340	0.0573831	16.9082	2.3e-16	0.0258	71615	33509	29872
WM561	FV396	WM340	0.0662007	14.5577	2.3e-16	0.0293132	72119	33105	28994
WM562	FV396	WM340	0.0640488	16.9393	2.3e-16	0.0286366	72101	33600	29555
WM563	FV396	WM340	0.0271388	5.55547	2.76863e-08	0.0123136	62732	26834	25416
FV396	WM340	WM579	0.0177927	4.07324	4.63646e-05	0.00714251	66230	29202	28181
FV396	WM340	WM580	0.0162835	2.99181	0.00277333	0.00653778	66042	29084	28152
FV396	WM340	WM581	0.0143644	2.63957	0.00830115	0.00575135	66249	28988	28167
XJ160	FV396	WM340	0.0690783	21.8185	2.3e-16	0.0309909	71421	33986	29594
WM441	FV396	WM436	0.0346251	13.0997	2.3e-16	0.0155736	80602	30568	28522
WM442	FV396	WM436	0.0422732	13.2147	2.3e-16	0.0202223	72745	32903	30234
WM561	FV396	WM436	0.0474548	11.7255	2.3e-16	0.0224655	73212	32502	29557
WM562	FV396	WM436	0.0442719	10.8958	2.3e-16	0.0211309	73120	32893	30104
WM563	FV396	WM436	0.0141393	3.36843	0.00075597	0.00673934	63472	26072	25345
WM436	FV396	WM579	0.0488602	19.7841	2.3e-16	0.0193058	66433	30182	27370
WM436	FV396	WM580	0.0460082	14.3636	2.3e-16	0.0182222	66136	30056	27412
WM436	FV396	WM581	0.0464594	12.6816	2.3e-16	0.018381	66358	30081	27410
XJ160	FV396	WM436	0.0524601	14.8329	2.3e-16	0.0250081	72440	33273	29956
FV396	WM441	WM442	0.0532414	15.5997	2.3e-16	0.0321134	47115	41088	36934
FV396	WM441	WM561	0.167831	31.7726	2.3e-16	0.110892	42811	47550	33883
FV396	WM441	WM562	0.0511593	13.0345	2.3e-16	0.0332714	46952	41186	37177
WM563	FV396	WM441	0.0655018	12.1902	2.3e-16	0.0486133	33037	37137	32571
FV396	WM441	WM579	0.00777114	1.7545	0.0793444	0.00223925	106770	20749	20429
FV396	WM441	WM580	0.00557056	1.27896	0.200911	0.00160689	106574	20669	20440
FV396	WM441	WM581	0.00733413	1.6547	0.0979851	0.00210939	106733	20671	20370
FV396	WM441	XJ160	0.0452641	11.961	2.3e-16	0.0272255	47786	40412	36912
WM442	WM561	FV396	0.0194102	4.85234	1.22015e-06	0.0101552	65969	30645	29478
WM442	WM562	FV396	0.00657576	1.29411	0.195629	0.00363329	62584	32222	31801
WM563	FV396	WM442	0.0429935	10.723	2.3e-16	0.0254985	38252	34048	31241
FV396	WM442	WM579	0.0129218	2.88447	0.00392072	0.00396112	97768	22184	21618
FV396	WM442	WM580	0.0133986	2.89807	0.00375471	0.00411217	97517	22161	21575
FV396	WM442	WM581	0.0117895	2.69761	0.00698386	0.0036092	97765	22099	21584
XJ160	WM442	FV396	0.0142244	3.15791	0.00158903	0.00594095	81058	24706	24013
WM562	WM561	FV396	0.0116314	3.30753	0.000941219	0.00676378	58569	33659	32885
WM563	FV396	WM561	0.0307115	7.5067	6.06182e-14	0.0192203	36829	33645	31640
WM561	FV396	WM579	0.00589888	1.09347	0.274186	0.00177807	98144	21486	21234
WM561	FV396	WM580	0.00482684	0.888961	0.374024	0.00145813	97919	21442	21236
WM561	FV396	WM581	0.00907942	1.80748	0.070688	0.00273868	98249	21561	21173
XJ160	WM561	FV396	0.0307376	10.1707	2.3e-16	0.0160537	65240	31119	29263
WM563	FV396	WM562	0.038813	12.0753	2.3e-16	0.0246342	37611	33817	31290
WM562	FV396	WM579	0.000643116	0.116741	0.907065	0.00019611	98291	21783	21755
FV396	WM562	WM580	0.00171959	0.315628	0.752285	0.000526793	98073	21845	21770
FV396	WM562	WM581	0.00142319	0.290122	0.771723	0.000434886	98287	21813	21751
XJ160	WM562	FV396	0.0170024	4.38373	1.16664e-05	0.00938637	62600	32719	31625
WM563	FV396	WM579	0.0467226	9.31475	2.3e-16	0.0139172	85396	18516	16863
WM563	FV396	WM580	0.0488301	9.17847	2.3e-16	0.0145748	85265	18558	16830
WM563	FV396	WM581	0.0462559	8.39962	2.3e-16	0.0137649	85435	18457	16825
WM563	FV396	XJ160	0.0354291	7.46918	8.06022e-14	0.0210619	38340	33580	31282
WM579	WM580	FV396	0.00725197	1.18315	0.236751	0.000734203	112088	9792	9651
WM581	WM579	FV396	0.00186278	0.282119	0.777852	0.000187264	112457	9681	9645
XJ160	FV396	WM579	0.00593391	1.07357	0.283014	0.0018164	97518	22038	21778
WM581	WM580	FV396	0.00877237	1.0725	0.283498	0.000900755	111403	9947	9774
XJ160	FV396	WM580	0.00459439	0.881488	0.378054	0.00140863	97245	21975	21774
XJ160	FV396	WM581	0.00451642	0.962314	0.335892	0.00138572	97522	22019	21821
MI096	MI058	MI1081	0.0091338	1.13167	0.257774	0.00665468	18418	11656	11445
MI058	MI096	MI2950	0.0435016	5.88418	4.00026e-09	0.0195447	23019	7784	7135
MI058	MI096	MI3071	0.0356148	4.43054	9.3997e-06	0.0124082	27336	5205	4847
MI058	MI096	MI3076	0.00640512	1.17178	0.241287	0.00448217	25825	12570	12410
MI058	MI096	MI375	0.0422047	6.75324	1.4458e-11	0.031799	15544	14125	12981
MI058	MI096	MI377	0.049044	8.41522	2.3e-16	0.0361478	17740	16021	14523
MI058	MI096	MI605	0.0258426	2.81933	0.00481241	0.0120886	18371	5220	4957
MI058	MI096	MI711	0.0382784	5.31027	1.09465e-07	0.0117094	40554	8612	7977
MI058	MI096	MI722	0.0487783	4.8324	1.34897e-06	0.0154162	28642	5902	5353
MI058	MI096	MI894	0.0469581	8.25807	2.3e-16	0.0351785	16928	15161	13801
MI058	WM009	MI096	0.0305	6.13144	8.7085e-10	0.0221859	21777	14900	14018
MI058	MI096	WM056	0.0818673	12.9938	2.3e-16	0.0518401	18617	17219	14613
MI058	MI096	WM329	0.0388905	5.75377	8.72753e-09	0.0143387	32407	12248	11331
MI058	MI096	WM330	0.0439519	7.60302	2.88658e-14	0.0162486	32466	12363	11322
MI058	MI096	WM340	0.0456075	8.58426	2.3e-16	0.0177075	32143	12426	11342
MI058	MI096	WM436	0.0347532	7.28101	3.31291e-13	0.0145772	32280	12401	11568
MI058	MI096	WM441	0.0663419	13.4122	2.3e-16	0.0435951	17873	17729	15523
MI058	WM442	MI096	0.0512195	9.1642	2.3e-16	0.0317061	26250	12930	11670
MI058	WM561	MI096	0.0244824	3.52102	0.000429885	0.0168082	23126	13830	13169
MI058	WM562	MI096	0.0295432	4.198	2.69279e-05	0.0214889	21684	14863	14010
MI058	MI096	WM563	0.0663078	8.92513	2.3e-16	0.045637	15334	13074	11448
MI058	MI096	WM579	0.0298192	4.19833	2.68888e-05	0.00848519	41875	8772	8264
MI058	MI096	WM580	0.0326935	4.43698	9.12307e-06	0.00933452	41768	8797	8240
MI058	MI096	WM581	0.0393849	6.99914	2.57527e-12	0.0112119	41974	8854	8183
MI058	XJ160	MI096	0.03917	5.68173	1.33338e-08	0.0241294	26557	12721	11762
MI1081	MI058	MI2950	0.00209205	0.312001	0.75504	0.00110233	31735	14370	14310
MI1081	MI058	MI3071	0.0149759	2.12137	0.0338904	0.00604114	39592	10200	9899
MI1081	MI058	MI3076	0.0416993	7.59519	3.06422e-14	0.0327359	32283	23907	21993
MI375	MI058	MI1081	0.0268808	7.67368	1.66533e-14	0.0205723	28872	21259	20146
MI377	MI058	MI1081	0.0204412	3.88224	0.000103498	0.0158408	31840	23937	22978
MI058	MI1081	MI605	0.0038153	0.512585	0.608242	0.00208228	26223	10261	10183
MI1081	MI058	MI711	0.024654	5.08242	3.72658e-07	0.00868963	55310	15918	15152
MI1081	MI058	MI722	0.0180222	2.22183	0.0262947	0.00656532	40143	11015	10625
MI894	MI058	MI1081	0.0264764	4.78718	1.69137e-06	0.0204223	30303	22874	21694
MI058	WM009	MI1081	0.0163278	3.51301	0.000443066	0.0109484	45470	20572	19911
WM056	MI058	MI1081	0.0183363	3.67231	0.000240366	0.0149845	32275	25297	24386
MI1081	MI058	WM329	0.0210754	4.01803	5.86863e-05	0.00910207	42631	22456	21529
MI1081	MI058	WM330	0.0148103	3.19013	0.00142211	0.00639538	42602	22372	21719
MI1081	MI058	WM340	0.0106141	2.28161	0.0225126	0.00482894	42040	22423	21952
MI1081	MI058	WM436	0.0266115	4.95619	7.18888e-07	0.0128404	42298	22703	21526
MI058	WM441	MI1081	0.00985332	1.99988	0.0455135	0.00800305	34041	24751	24268
MI058	WM442	MI1081	0.0292696	4.68293	2.82809e-06	0.0167534	53306	17776	16765
MI058	WM561	MI1081	0.0333997	6.20461	5.48334e-10	0.0210761	47388	19477	18218
MI058	WM562	MI1081	0.0225538	3.93945	8.16698e-05	0.0150937	45200	20629	19719
WM563	MI058	MI1081	0.0573907	12.4074	2.3e-16	0.0451709	25906	21271	18962
MI1081	MI058	WM579	0.0206702	3.85562	0.000115437	0.00680013	57179	16295	15635
MI1081	MI058	WM580	0.018983	3.31573	0.000914036	0.0062416	57028	16211	15607
MI1081	MI058	WM581	0.0179792	3.54049	0.000399392	0.00589486	57159	16165	15594
MI058	XJ160	MI1081	0.0347439	5.90816	3.45951e-09	0.0197693	53198	17765	16572
MI2950	MI058	MI3071	0.00963844	1.2502	0.211226	0.00502833	21598	10737	10532
MI3076	MI058	MI2950	0.0317746	5.85945	4.64403e-09	0.0175981	32030	18655	17506
MI058	MI375	MI2950	0.0319662	5.50803	3.62875e-08	0.0151603	37277	13914	13052
MI058	MI377	MI2950	0.0483341	6.19772	5.72887e-10	0.0230761	41907	16126	14639
MI605	MI2950	MI058	0.138939	21.2084	2.3e-16	0.0485906	17748	10132	7660
MI2950	MI058	MI711	0.0330783	7.15749	8.21787e-13	0.014935	30099	17349	16238
MI2950	MI058	MI722	0.0352585	6.18715	6.12628e-10	0.0164676	21803	11965	11150
MI058	MI894	MI2950	0.0290871	5.10315	3.34038e-07	0.0139335	39888	15054	14203
MI058	WM009	MI2950	0.0108151	2.08033	0.0374948	0.00439672	55254	13412	13125
MI058	WM056	MI2950	0.0524295	8.57572	2.3e-16	0.0270262	42169	17544	15796
MI2950	WM329	MI058	0.0856095	10.8527	2.3e-16	0.034164	36795	20131	16956
MI2950	WM330	MI058	0.0885519	12.7807	2.3e-16	0.0354183	37093	20277	16978
MI2950	WM340	MI058	0.100513	14.6167	2.3e-16	0.039732	37345	20261	16560
MI2950	WM436	MI058	0.101266	14.0979	2.3e-16	0.0402265	36685	20358	16614
MI058	WM441	MI2950	0.0365873	6.16564	7.01965e-10	0.0178218	44488	16475	15312
MI058	WM442	MI2950	0.020793	2.89674	0.00377066	0.00723283	62582	11586	11114
MI058	WM561	MI2950	0.0242994	4.85402	1.20981e-06	0.00929973	56950	12646	12046
MI058	WM562	MI2950	0.0234387	3.41268	0.000643266	0.00941963	54931	13405	12791
MI058	WM563	MI2950	0.0371504	5.57477	2.47853e-08	0.0191016	33121	13889	12894
MI2950	MI058	WM579	0.027104	5.90432	3.5411e-09	0.0113855	31523	17678	16745
MI2950	MI058	WM580	0.0247216	4.77036	1.83898e-06	0.0103816	31345	17575	16727
MI2950	MI058	WM581	0.0263166	4.85176	1.22373e-06	0.0110437	31511	17608	16705
MI058	XJ160	MI2950	0.0211202	3.38025	0.0007242	0.0073099	62642	11531	11054
MI3076	MI058	MI3071	0.00125599	0.280821	0.778848	0.000546868	41084	12755	12723
MI058	MI375	MI3071	0.00733154	1.2455	0.212948	0.00264607	45908	9343	9207
MI058	MI377	MI3071	0.0219122	3.52318	0.000426403	0.00799153	51930	10913	10445
MI605	MI058	MI3071	0.0221089	2.08798	0.0368001	0.0121594	15415	9223	8824
MI3071	MI711	MI058	0.148983	16.7545	2.3e-16	0.0239416	44524	9351	6926
MI3071	MI722	MI058	0.118641	15.058	2.3e-16	0.0188371	31287	6256	4929
MI058	MI894	MI3071	0.00952001	1.818	0.069064	0.00345726	48874	10127	9936
WM009	MI058	MI3071	0.0050583	0.525222	0.599429	0.00159535	65258	9438	9343
WM056	MI058	MI3071	0.000308656	0.0444061	0.964581	0.000118971	52157	11343	11336
MI058	WM329	MI3071	0.0487143	6.57818	4.7625e-11	0.0254189	34036	16232	14724
MI058	WM330	MI3071	0.0512539	6.50753	7.63947e-11	0.0267479	34201	16306	14716
MI058	WM340	MI3071	0.0104576	1.80372	0.071276	0.00533194	34921	15315	14998
WM436	MI058	MI3071	0.0185562	3.41075	0.000647847	0.00929061	35100	15287	14730
MI058	WM441	MI3071	0.000904077	0.136598	0.891349	0.000336536	54419	11071	11051
MI058	WM442	MI3071	0.0165499	1.88183	0.0598591	0.00449238	72415	8200	7933
MI058	WM561	MI3071	0.0255737	3.07361	0.00211484	0.00762904	66643	8983	8535
MI058	WM562	MI3071	0.0181469	2.11185	0.034699	0.00572786	64893	9538	9198
WM563	MI058	MI3071	0.012027	2.05286	0.0400862	0.00471181	40532	9214	8995
MI3071	WM579	MI058	0.10226	14.931	2.3e-16	0.017148	46510	9534	7765
MI3071	WM580	MI058	0.109133	13.916	2.3e-16	0.0183248	46495	9594	7706
MI3071	WM581	MI058	0.103875	10.9377	2.3e-16	0.017412	46633	9543	7747
MI058	XJ160	MI3071	0.0135646	1.41776	0.156262	0.00368526	72451	8182	7963
MI375	MI058	MI3076	0.00665546	1.41773	0.156268	0.00489068	39507	21856	21567
MI377	MI058	MI3076	0.00191798	0.437746	0.66157	0.00142979	43522	24552	24458
MI3076	MI058	MI605	0.020405	4.78679	1.69467e-06	0.0118077	27105	13252	12722
MI3076	MI058	MI711	0.015301	4.53377	5.79405e-06	0.00577775	55937	19608	19017
MI3076	MI058	MI722	0.0147898	2.93718	0.00331215	0.00579467	41667	13963	13556
MI894	MI058	MI3076	0.0126718	2.55363	0.0106607	0.00938276	41466	23695	23102
MI058	WM009	MI3076	0.0267923	6.39671	1.58761e-10	0.0169864	59929	21634	20505
WM056	MI058	MI3076	0.00506698	1.38733	0.165341	0.00398882	43921	26183	25919
MI3076	MI058	WM329	0.0503486	12.7389	2.3e-16	0.0227979	42358	28476	25746
MI3076	MI058	WM330	0.0492928	15.587	2.3e-16	0.0223451	42342	28599	25912
MI3076	MI058	WM340	0.0504955	11.4916	2.3e-16	0.0240395	41866	28834	26062
MI3076	MI058	WM436	0.0625697	14.1408	2.3e-16	0.0316037	42156	29065	25642
MI058	WM441	MI3076	0.0193377	4.09218	4.27345e-05	0.0148708	46347	26040	25052
MI058	WM442	MI3076	0.0458243	7.66443	1.79856e-14	0.0249247	69495	18897	17241
MI058	WM561	MI3076	0.036799	7.04579	1.84408e-12	0.0219201	62402	20328	18885
MI058	WM562	MI3076	0.0280623	5.9889	2.11259e-09	0.017792	59861	21633	20452
WM563	MI058	MI3076	0.0405961	7.35037	1.9762e-13	0.0308233	35621	22134	20407
MI3076	MI058	WM579	0.0131834	5.19223	2.07785e-07	0.00465311	57891	20097	19574
MI3076	MI058	WM580	0.00955076	2.69067	0.00713081	0.00337485	57650	19978	19600
MI3076	MI058	WM581	0.00998125	3.84393	0.000121079	0.00351109	57807	19934	19540
MI058	XJ160	MI3076	0.0386388	6.05355	1.41686e-09	0.0209525	69593	18709	17317
MI377	MI375	MI058	0.0104523	1.70797	0.087642	0.00659922	28861	25570	25041
MI058	MI375	MI605	0.0149942	2.68687	0.00721251	0.00738312	30938	9680	9394
MI058	MI375	MI711	0.0163752	3.50878	0.00045017	0.00518214	64159	14648	14176
MI058	MI375	MI722	0.0177515	2.5335	0.0112929	0.00585069	47307	10406	10043
MI894	MI375	MI058	0.0212552	2.64086	0.0082697	0.0110416	33329	20348	19501
MI058	WM009	MI375	0.0275965	6.37872	1.7857e-10	0.0186338	39889	23459	22199
WM056	MI375	MI058	0.0319057	5.85451	4.78426e-09	0.0204357	30678	26925	25260
MI058	MI375	WM329	0.0386957	7.28422	3.23519e-13	0.0151473	50078	21407	19812
MI058	MI375	WM330	0.0442572	9.28168	2.3e-16	0.0172697	49925	21566	19738
MI058	MI375	WM340	0.0426102	9.04268	2.3e-16	0.0175827	49525	21777	19997
MI058	MI375	WM436	0.0383553	7.62612	2.42029e-14	0.0169357	49650	21617	20020
MI375	WM441	MI058	0.0254417	5.10511	3.30605e-07	0.0168292	30976	27307	25952
MI058	WM442	MI375	0.0301188	4.21663	2.47982e-05	0.0171498	47914	19820	18661
MI058	WM561	MI375	0.051076	7.5957	3.06422e-14	0.0324599	41767	22369	20195
MI058	WM562	MI375	0.0297288	6.03116	1.62788e-09	0.0198878	39592	23259	21916
WM563	MI375	MI058	0.0577859	11.8128	2.3e-16	0.0368812	23531	23028	20512
MI058	MI375	WM579	0.0124023	2.46234	0.0138033	0.00366848	66371	15020	14652
MI058	MI375	WM580	0.0154575	2.7278	0.00637588	0.00456466	66182	15011	14554
MI058	MI375	WM581	0.0179238	3.55996	0.000370906	0.00526447	66228	14993	14465
MI058	XJ160	MI375	0.0248609	4.46914	7.8536e-06	0.0141445	47971	19705	18749
MI058	MI377	MI605	0.022204	3.16583	0.00154639	0.0109784	35171	11233	10745
MI058	MI377	MI711	0.028381	7.19598	6.20171e-13	0.00900936	71219	16668	15748
MI058	MI377	MI722	0.0265609	4.69128	2.71495e-06	0.00872461	52780	11846	11233
MI894	MI377	MI058	0.00427885	0.684333	0.493765	0.00268511	30818	26874	26645
MI058	WM009	MI377	0.0327041	6.94556	3.76943e-12	0.0214413	44743	26067	24416
WM056	MI377	MI058	0.0222835	4.27863	1.88045e-05	0.0140766	35757	29269	27993
MI058	MI377	WM329	0.0561212	14.1384	2.3e-16	0.0221753	55117	24530	21923
MI058	MI377	WM330	0.0568952	16.9716	2.3e-16	0.0223929	55071	24567	21922
MI058	MI377	WM340	0.0580747	15.353	2.3e-16	0.0239757	54437	24687	21977
MI058	MI377	WM436	0.0512437	11.6666	2.3e-16	0.0227672	54662	24597	22199
MI377	WM441	MI058	0.0369486	8.45357	2.3e-16	0.0236917	36005	29973	27837
MI058	WM442	MI377	0.0473558	8.78088	2.3e-16	0.0262676	53536	22360	20338
MI058	WM561	MI377	0.0589972	8.8349	2.3e-16	0.0366744	46878	25112	22314
MI058	WM562	MI377	0.0398341	8.95314	2.3e-16	0.0259791	44382	26078	24080
WM563	MI377	MI058	0.0490735	9.60377	2.3e-16	0.0307815	27537	25108	22759
MI058	MI377	WM579	0.0265524	6.43883	1.20397e-10	0.0078614	73494	17069	16186
MI058	MI377	WM580	0.0298552	7.39135	1.45439e-13	0.00883408	73229	17075	16085
MI058	MI377	WM581	0.0316879	8.64289	2.3e-16	0.00932465	73355	17044	15997
MI058	XJ160	MI377	0.0312309	5.65567	1.55244e-08	0.0173034	53888	21991	20659
MI605	MI058	MI711	0.0560258	10.3767	2.3e-16	0.0264615	20751	14410	12881
MI605	MI058	MI722	0.0554705	8.00628	1.11022e-15	0.0273249	14436	9647	8633
MI058	MI894	MI605	0.00446193	0.6598	0.509382	0.0022174	33050	10468	10375
MI058	WM009	MI605	0.00156169	0.243003	0.808003	0.000664894	45421	9620	9590
MI058	WM056	MI605	0.0361516	5.96269	2.48117e-09	0.0194257	35175	12439	11571
MI605	WM329	MI058	0.192472	25.9044	2.3e-16	0.0815228	24359	18819	12744
MI605	WM330	MI058	0.189027	24.869	2.3e-16	0.0799871	24434	18789	12815
MI605	WM340	MI058	0.204722	30.8702	2.3e-16	0.0865956	24594	19031	12563
MI605	WM436	MI058	0.203864	26.5581	2.3e-16	0.0862672	24207	19006	12569
MI058	WM441	MI605	0.0197085	3.34225	0.000831023	0.0100452	37114	11719	11266
MI058	WM442	MI605	0.0224123	2.48339	0.013014	0.00824815	51052	8485	8113
MI058	WM561	MI605	0.0177258	2.81389	0.00489462	0.0071302	46739	9129	8811
MI058	WM562	MI605	0.0251704	3.25539	0.00113237	0.010657	45227	9775	9295
MI058	WM563	MI605	0.0318051	5.38784	7.13089e-08	0.0170278	27133	9700	9102
MI605	MI058	WM579	0.0521616	10.0858	2.3e-16	0.0230641	21793	14846	13374
MI605	MI058	WM580	0.0476765	8.78653	2.3e-16	0.0210991	21701	14756	13413
MI605	MI058	WM581	0.0488541	8.99345	2.3e-16	0.0215386	21761	14760	13385
MI058	XJ160	MI605	0.012709	1.67623	0.0936923	0.00463394	51075	8327	8118
MI722	MI711	MI058	0.0380202	3.54836	0.000387641	0.00421053	54934	6061	5617
MI058	MI894	MI711	0.016212	2.59969	0.00933075	0.00516229	67587	15702	15201
MI058	WM009	MI711	0.0117522	2.88702	0.00388908	0.00322212	90459	14334	14001
MI058	WM056	MI711	0.00407735	1.03365	0.301298	0.00136727	71545	17238	17098
MI058	WM329	MI711	0.0717641	12.8271	2.3e-16	0.033176	45169	25553	22131
MI058	WM330	MI711	0.0687245	9.84803	2.3e-16	0.0315875	45323	25379	22115
MI058	WM340	MI711	0.0183594	4.65735	3.20309e-06	0.00818617	46557	23463	22617
WM436	MI058	MI711	0.0256433	8.34075	2.3e-16	0.0111453	47099	23278	22114
MI058	WM441	MI711	0.0129653	2.55171	0.0107197	0.00420091	74787	16954	16520
MI058	WM442	MI711	0.0278937	6.04201	1.52204e-09	0.00653399	100976	12437	11762
MI058	WM561	MI711	0.0199764	2.9982	0.00271583	0.00513402	92971	13403	12878
MI058	WM562	MI711	0.0258716	3.74895	0.000177579	0.00702492	89975	14374	13649
WM563	MI058	MI711	0.0181438	3.53337	0.000410303	0.00618091	57721	14590	14070
WM579	MI711	MI058	0.0642008	7.69868	1.37668e-14	0.00661918	83502	8056	7084
WM580	MI711	MI058	0.0579032	6.64213	3.09177e-11	0.00590743	83512	7911	7045
WM581	MI711	MI058	0.0698836	8.42244	2.3e-16	0.00723493	83524	8137	7074
MI058	XJ160	MI711	0.0197344	2.56949	0.010185	0.00461717	101084	12324	11847
MI058	MI894	MI722	0.0166606	2.07625	0.0378706	0.00553767	50018	11228	10860
WM009	MI058	MI722	0.00489638	0.693267	0.488142	0.00138877	66869	10159	10060
WM056	MI058	MI722	0.00114388	0.20049	0.841097	0.000397186	53151	12253	12225
MI058	WM329	MI722	0.0602218	9.96012	2.3e-16	0.0288152	33846	18019	15972
MI058	WM330	MI722	0.0602949	8.77324	2.3e-16	0.0287886	34004	18016	15967
MI058	WM340	MI722	0.013532	2.25198	0.0243238	0.00625132	34819	16665	16220
WM436	MI058	MI722	0.030095	9.892	2.3e-16	0.0136198	35310	16806	15824
MI058	WM441	MI722	0.00271478	0.404066	0.686164	0.000913435	55596	12004	11939
MI058	WM442	MI722	0.0202307	4.24216	2.21378e-05	0.00490458	74641	8800	8451
MI058	WM561	MI722	0.0184307	2.11175	0.0347077	0.00485644	68701	9449	9107
MI058	WM562	MI722	0.025105	2.36694	0.0179357	0.00706207	66537	10249	9747
WM563	MI058	MI722	0.0269627	3.91164	9.16712e-05	0.00950218	42393	10360	9816
WM579	MI722	MI058	0.0215328	3.23306	0.00122471	0.00259504	57430	6618	6339
WM580	MI722	MI058	0.0132461	1.92256	0.0545349	0.00158434	57342	6502	6332
WM581	MI722	MI058	0.0259181	2.79648	0.00516631	0.00307747	57645	6551	6220
MI058	XJ160	MI722	0.0126245	1.55331	0.120348	0.00306386	74688	8743	8525
MI058	WM009	MI894	0.0284251	7.63642	2.24265e-14	0.0189239	42945	24693	23328
WM056	MI894	MI058	0.0170401	2.39718	0.016522	0.0110208	32985	28440	27487
MI058	MI894	WM329	0.0351478	5.93284	2.9774e-09	0.013817	52615	22810	21261
MI058	MI894	WM330	0.0412546	10.8218	2.3e-16	0.0161893	52504	23006	21183
MI058	MI894	WM340	0.0411461	8.94717	2.3e-16	0.0170822	52037	23292	21451
MI058	MI894	WM436	0.0339215	6.88217	5.89484e-12	0.0150745	52155	23058	21545
MI894	WM441	MI058	0.0391176	6.459	1.05396e-10	0.025663	33215	29393	27180
MI058	WM442	MI894	0.0381341	8.03482	8.88178e-16	0.021497	51418	21098	19548
MI058	WM561	MI894	0.0559395	10.3	2.3e-16	0.0352284	44882	23756	21239
MI058	WM562	MI894	0.0305666	6.08539	1.16207e-09	0.020292	42759	24646	23184
WM563	MI894	MI058	0.0436109	6.30575	2.86794e-10	0.0279349	25309	24289	22259
MI058	MI894	WM579	0.0131948	2.51672	0.0118453	0.00392179	69818	16087	15668
MI058	MI894	WM580	0.0132947	2.0846	0.0371052	0.0039588	69629	16082	15660
MI058	MI894	WM581	0.0155958	3.17054	0.00152154	0.00461282	69768	16052	15559
MI058	XJ160	MI894	0.0299277	7.17895	7.02549e-13	0.0168222	51610	20872	19659
MI058	WM009	WM056	0.0725265	17.3299	2.3e-16	0.040627	45852	28016	24227
MI058	WM009	WM329	0.062481	12.0965	2.3e-16	0.020678	72582	20916	18456
MI058	WM009	WM330	0.0671555	11.8452	2.3e-16	0.0222196	72541	21103	18447
MI058	WM009	WM340	0.0709374	15.0409	2.3e-16	0.0248029	71977	21415	18578
MI058	WM009	WM436	0.0490822	9.48482	2.3e-16	0.0183147	72298	20861	18909
MI058	WM009	WM441	0.0720896	18.2997	2.3e-16	0.0414529	43427	28903	25016
MI058	WM442	WM009	0.126353	24.689	2.3e-16	0.0886927	36933	30808	23896
MI058	WM561	WM009	0.0411056	6.39238	1.6332e-10	0.0314464	32795	30735	28308
MI058	WM562	WM009	0.0591792	11.5378	2.3e-16	0.0485168	30025	33809	30031
MI058	WM009	WM563	0.0614683	19.3446	2.3e-16	0.0378979	38938	22216	19643
MI058	WM009	WM579	0.0571929	10.7802	2.3e-16	0.0146619	92335	15407	13740
MI058	WM009	WM580	0.0579029	10.9273	2.3e-16	0.01487	92147	15411	13724
MI058	WM009	WM581	0.0617692	12.3632	2.3e-16	0.0158008	92300	15436	13640
MI058	XJ160	WM009	0.0954626	18.4171	2.3e-16	0.0665255	37614	29744	24560
MI058	WM056	WM329	0.0950081	21.8082	2.3e-16	0.0401906	54565	27321	22580
MI058	WM056	WM330	0.0968193	22.6332	2.3e-16	0.0409035	54560	27449	22603
MI058	WM056	WM340	0.0976992	22.4973	2.3e-16	0.0436313	54097	27791	22844
MI058	WM056	WM436	0.0812264	19.4764	2.3e-16	0.0386104	54322	27155	23075
WM056	WM441	MI058	0.0581958	12.7133	2.3e-16	0.0371271	39237	30939	27536
MI058	WM442	WM056	0.0797923	17.6903	2.3e-16	0.0379119	54943	23912	20378
MI058	WM561	WM056	0.0892005	15.235	2.3e-16	0.0471583	48104	26601	22244
MI058	WM562	WM056	0.078806	16.203	2.3e-16	0.0442443	45683	28207	24086
WM563	WM056	MI058	0.0265527	5.65873	1.52502e-08	0.0166647	30839	24627	23353
MI058	WM056	WM579	0.0344245	8.01187	1.11022e-15	0.0108469	73333	18360	17138
MI058	WM056	WM580	0.0356217	6.6632	2.67926e-11	0.0112459	73153	18374	17110
MI058	WM056	WM581	0.0381623	7.47246	7.86038e-14	0.0119753	73255	18349	17000
MI058	XJ160	WM056	0.0653166	13.2442	2.3e-16	0.0308608	55122	23462	20585
WM329	WM330	MI058	0.00289989	0.413726	0.679074	0.000906793	75286	19540	19427
WM329	WM340	MI058	0.0186358	3.54733	0.000389158	0.00656322	66039	22356	21538
WM329	WM436	MI058	0.0159782	3.70792	0.000208966	0.00627123	59027	24830	24049
MI058	WM441	WM329	0.0774522	16.4269	2.3e-16	0.031054	57722	25687	21994
MI058	WM442	WM329	0.0774305	17.2855	2.3e-16	0.0219132	82620	18131	15525
MI058	WM561	WM329	0.0618526	8.89765	2.3e-16	0.0191062	75148	19322	17071
MI058	WM562	WM329	0.0619116	11.7497	2.3e-16	0.0203717	72372	20754	18334
MI058	WM563	WM329	0.0815681	18.0611	2.3e-16	0.0349691	44222	22568	19164
MI058	WM329	WM579	0.10221	19.2276	2.3e-16	0.0443032	46397	27105	22078
MI058	WM329	WM580	0.102838	18.1225	2.3e-16	0.0445192	46203	27030	21989
MI058	WM329	WM581	0.102263	18.1745	2.3e-16	0.0441459	46366	26990	21982
MI058	XJ160	WM329	0.0556201	11.2057	2.3e-16	0.0156983	82977	17717	15850
WM330	WM340	MI058	0.0159528	4.58842	4.46617e-06	0.00565099	65961	22449	21744
WM330	WM436	MI058	0.0136645	3.09865	0.00194404	0.00537471	59159	24851	24181
MI058	WM441	WM330	0.0768261	14.971	2.3e-16	0.030616	57650	25636	21978
MI058	WM442	WM330	0.0776011	18.174	2.3e-16	0.0218073	82610	18094	15488
MI058	WM561	WM330	0.0675236	12.6492	2.3e-16	0.0208516	75132	19517	17048
MI058	WM562	WM330	0.062037	12.9576	2.3e-16	0.0204162	72446	20860	18423
MI058	WM563	WM330	0.0790174	17.3787	2.3e-16	0.0337884	44155	22511	19214
MI058	WM330	WM579	0.0980624	15.6773	2.3e-16	0.0422491	46577	26891	22088
MI058	WM330	WM580	0.0994219	16.3529	2.3e-16	0.0429064	46416	26910	22043
MI058	WM330	WM581	0.101447	16.2863	2.3e-16	0.043598	46499	26899	21944
MI058	XJ160	WM330	0.0591387	11.7892	2.3e-16	0.0166291	82933	17793	15806
WM436	WM340	MI058	0.000706244	0.191576	0.848075	0.000274185	59983	24088	24054
MI058	WM441	WM340	0.0844825	16.5808	2.3e-16	0.0356824	57064	26187	22107
MI058	WM442	WM340	0.0875792	18.9181	2.3e-16	0.0260976	81965	18528	15544
MI058	WM561	WM340	0.0645457	13.5073	2.3e-16	0.0210993	74704	19709	17319
MI058	WM562	WM340	0.0669538	12.0678	2.3e-16	0.0231389	71743	21059	18416
MI058	WM563	WM340	0.0909091	19.5486	2.3e-16	0.0407714	43627	22908	19090
MI058	WM340	WM579	0.0551789	12.4777	2.3e-16	0.0231235	47702	25137	22508
MI058	WM340	WM580	0.0537526	12.0897	2.3e-16	0.0225572	47614	25083	22524
MI058	WM340	WM581	0.052277	10.2519	2.3e-16	0.0218457	47768	24990	22507
MI058	XJ160	WM340	0.06827	18.2972	2.3e-16	0.0203086	82283	18167	15845
MI058	WM441	WM436	0.0602983	14.0927	2.3e-16	0.0273573	57698	25629	22714
MI058	WM442	WM436	0.0695225	12.797	2.3e-16	0.0221788	82214	18176	15813
MI058	WM561	WM436	0.0506397	9.65341	2.3e-16	0.0177769	74948	19461	17585
MI058	WM562	WM436	0.0589154	11.1594	2.3e-16	0.0219744	72021	21020	18681
MI058	WM563	WM436	0.0762279	16.9816	2.3e-16	0.0367833	43868	22625	19420
WM436	MI058	WM579	0.00953363	3.35329	0.000798576	0.00389286	48636	23508	23064
WM436	MI058	WM580	0.00515929	1.8437	0.0652267	0.00211266	48394	23379	23139
WM436	MI058	WM581	0.00574206	1.66277	0.0963589	0.00234529	48576	23383	23116
MI058	XJ160	WM436	0.0531668	9.7438	2.3e-16	0.016977	82525	17917	16108
MI058	WM442	WM441	0.0813558	21.4888	2.3e-16	0.0397956	52504	24789	21059
MI058	WM561	WM441	0.224247	46.0403	2.3e-16	0.130653	43674	33122	20988
MI058	WM562	WM441	0.072467	21.1953	2.3e-16	0.0418371	43456	28992	25074
WM563	WM441	MI058	0.0842135	18.0742	2.3e-16	0.0537423	30285	26689	22543
MI058	WM441	WM579	0.0535745	10.2775	2.3e-16	0.0163117	76524	18230	16376
MI058	WM441	WM580	0.052714	8.66099	2.3e-16	0.0160302	76333	18153	16335
MI058	WM441	WM581	0.0552653	10.0121	2.3e-16	0.0167576	76483	18178	16274
MI058	XJ160	WM441	0.0588235	16.7158	2.3e-16	0.0285726	52869	24102	21424
MI058	WM442	WM561	0.113045	20.1232	2.3e-16	0.0825397	33020	30764	24515
MI058	WM442	WM562	0.11355	24.2622	2.3e-16	0.0798317	37175	30332	24146
MI058	WM442	WM563	0.0688268	11.499	2.3e-16	0.0360548	46433	19000	16553
MI058	WM442	WM579	0.0835322	20.5458	2.3e-16	0.0184781	103116	13620	11520
MI058	WM442	WM580	0.0852992	23.4299	2.3e-16	0.0188453	102872	13595	11458
MI058	WM442	WM581	0.0835066	24.3889	2.3e-16	0.0183783	103118	13546	11458
XJ160	WM442	MI058	0	0	1	0	37314	24255	24255
MI058	WM561	WM562	0.0442708	8.01478	1.11022e-15	0.0340877	32721	30877	28259
MI058	WM561	WM563	0.0966694	14.8804	2.3e-16	0.0565808	40518	21600	17792
MI058	WM561	WM579	0.0531101	8.10308	4.44089e-16	0.0127739	95117	14247	12810
MI058	WM561	WM580	0.0568768	7.33339	2.24487e-13	0.0136585	94851	14243	12710
MI058	WM561	WM581	0.0503121	8.51785	2.3e-16	0.0120387	95151	14133	12779
MI058	XJ160	WM561	0.0948797	14.8011	2.3e-16	0.0692725	33466	30257	25013
MI058	WM562	WM563	0.0732328	12.3924	2.3e-16	0.044974	38665	22349	19299
MI058	WM562	WM579	0.0605366	8.92581	2.3e-16	0.0153441	92011	15259	13517
MI058	WM562	WM580	0.0656039	8.54648	2.3e-16	0.0167087	91808	15374	13481
MI058	WM562	WM581	0.064012	8.89042	2.3e-16	0.0162006	92009	15284	13445
MI058	XJ160	WM562	0.103135	18.2751	2.3e-16	0.0720084	37290	29842	24262
MI058	WM563	WM579	0.000674127	0.149468	0.881184	0.000217379	59400	14844	14824
MI058	WM563	WM580	0.000610625	0.144406	0.88518	0.000196021	59201	14748	14730
MI058	WM563	WM581	0.00203528	0.442087	0.658426	0.000652479	59399	14770	14710
MI058	XJ160	WM563	0.0650255	9.94146	2.3e-16	0.0338613	46571	18819	16521
WM579	WM580	MI058	0.00606061	0.748655	0.454065	0.000603626	89118	7470	7380
WM581	WM579	MI058	0.00469164	0.544191	0.58631	0.00046212	89503	7388	7319
MI058	XJ160	WM579	0.0572458	9.80508	2.3e-16	0.0125834	103397	13205	11775
WM581	WM580	MI058	0.0104146	0.989431	0.322452	0.0010526	88646	7616	7459
MI058	XJ160	WM580	0.0610167	10.4482	2.3e-16	0.0134223	103154	13233	11711
MI058	XJ160	WM581	0.0615973	10.4487	2.3e-16	0.0134752	103344	13193	11662
MI1081	MI096	MI2950	0.0309795	3.19062	0.0014197	0.016133	20840	9884	9290
MI1081	MI096	MI3071	0.0248471	2.8133	0.00490364	0.0100339	25722	6785	6456
MI1081	MI096	MI3076	0.0357831	5.94331	2.7933e-09	0.0275681	21777	16123	15009
MI375	MI096	MI1081	0.0182156	2.87884	0.00399136	0.0131859	20100	13695	13205
MI377	MI096	MI1081	0.0130207	1.58482	0.113008	0.00955959	22846	15638	15236
MI1081	MI096	MI605	0.00951249	1.07023	0.284514	0.00518072	17039	6792	6664
MI1081	MI096	MI711	0.0451803	6.89313	5.45786e-12	0.0157926	37368	11000	10049
MI1081	MI096	MI722	0.0454987	5.38805	7.12279e-08	0.0165757	26546	7537	6881
MI894	MI096	MI1081	0.0177958	2.08504	0.0370657	0.0129802	21396	14813	14295
MI096	WM009	MI1081	0.0198288	4.36916	1.24727e-05	0.0147452	25472	16021	15398
WM056	MI096	MI1081	0.0118889	1.58449	0.113081	0.00907046	23913	16299	15916
MI1081	MI096	WM329	0.0489826	7.63039	2.33147e-14	0.0208955	28699	15826	14348
MI1081	MI096	WM330	0.0475245	7.45375	9.08162e-14	0.0202825	28660	15826	14390
MI1081	MI096	WM340	0.0437508	9.82451	2.3e-16	0.0198899	28346	15984	14644
MI1081	MI096	WM436	0.0564882	7.97866	1.55431e-15	0.0269206	28676	16047	14331
MI096	WM441	MI1081	0.0196091	3.41977	0.000626742	0.014966	24740	16431	15799
MI096	WM442	MI1081	0.0297414	5.13159	2.87299e-07	0.0221165	25777	16169	15235
MI096	WM561	MI1081	0.0381275	8.05315	8.88178e-16	0.0285988	24902	16255	15061
MI096	WM562	MI1081	0.0284256	4.00409	6.22557e-05	0.0211243	25416	16118	15227
WM563	MI096	MI1081	0.058623	10.9442	2.3e-16	0.0433127	18347	13661	12148
MI1081	MI096	WM579	0.0398008	6.51699	7.17324e-11	0.0129319	38752	11273	10410
MI1081	MI096	WM580	0.0394943	6.57303	4.93021e-11	0.0128867	38636	11265	10409
MI1081	MI096	WM581	0.0423171	7.63603	2.24265e-14	0.0138416	38808	11318	10399
MI096	XJ160	MI1081	0.0378754	7.78285	7.10543e-15	0.0283732	25584	16414	15216
MI2950	MI096	MI3071	0.0221448	2.94554	0.00322392	0.0114934	14209	7039	6734
MI3076	MI096	MI2950	0.0615591	9.46719	2.3e-16	0.0337306	21450	13080	11563
MI096	MI375	MI2950	0.00556628	0.699373	0.484319	0.00256504	25676	8852	8754
MI096	MI377	MI2950	0.025636	2.5481	0.010831	0.0118626	29481	10382	9863
MI605	MI2950	MI096	0.13556	14.1519	2.3e-16	0.0517355	11397	6580	5009
MI2950	MI096	MI711	0.0478686	7.46482	8.34888e-14	0.0215152	20621	11799	10721
MI2950	MI096	MI722	0.0525622	5.92746	3.07656e-09	0.024617	14533	7980	7183
MI096	MI894	MI2950	0.0032763	0.351618	0.725125	0.00152587	27632	9646	9583
WM009	MI096	MI2950	0.0205637	2.83405	0.00459624	0.00939963	32428	10447	10026
MI096	WM056	MI2950	0.0263682	2.80045	0.00510309	0.0129633	30235	11074	10505
MI2950	WM329	MI096	0.0923628	11.4979	2.3e-16	0.040848	24764	13867	11522
MI2950	WM330	MI096	0.0963079	14.8287	2.3e-16	0.0428241	24870	14030	11565
MI2950	WM340	MI096	0.112702	14.679	2.3e-16	0.0495127	24717	14069	11219
MI2950	WM436	MI096	0.104805	13.7886	2.3e-16	0.0466851	24683	14152	11467
MI096	WM441	MI2950	0.0115171	1.35417	0.175682	0.00547951	31536	10671	10428
WM442	MI096	MI2950	0.0116382	1.66433	0.0960461	0.00529445	32649	10257	10021
WM561	MI096	MI2950	0.00565639	0.674852	0.49977	0.00261715	31936	10223	10108
WM562	MI096	MI2950	0.00893295	1.06915	0.285001	0.00409117	32247	10278	10096
MI096	WM563	MI2950	0.0119406	1.24136	0.214472	0.00590867	23117	8729	8523
MI2950	MI096	WM579	0.0406917	5.59005	2.27e-08	0.0170475	21639	12097	11151
MI2950	MI096	WM580	0.0417529	6.24849	4.14433e-10	0.0175162	21558	12076	11108
MI2950	MI096	WM581	0.0434407	7.19684	6.16174e-13	0.0182065	21661	12082	11076
XJ160	MI096	MI2950	0.00763957	1.04605	0.295539	0.00350546	32500	10288	10132
MI3076	MI096	MI3071	0.0193693	2.6243	0.00868274	0.00836948	27310	8631	8303
MI375	MI096	MI3071	0.0181604	2.3669	0.0179379	0.00637431	30982	6055	5839
MI377	MI096	MI3071	0.00343348	0.429189	0.667786	0.00122945	35617	7014	6966
MI605	MI096	MI3071	0.0295694	3.20862	0.00133373	0.0163184	9849	5954	5612
MI3071	MI711	MI096	0.136414	12.3633	2.3e-16	0.0236556	29291	6173	4691
MI3071	MI722	MI096	0.111753	10.7113	2.3e-16	0.0191392	20071	4039	3227
MI894	MI096	MI3071	0.0182408	2.08242	0.037304	0.00643017	33339	6587	6351
WM009	MI096	MI3071	0.0188465	2.07399	0.0380799	0.00667051	38697	7190	6924
WM056	MI096	MI3071	0.0331381	3.31445	0.00091823	0.0121308	36649	7498	7017
MI096	WM329	MI3071	0.0349466	4.62036	3.83071e-06	0.0181459	23119	10617	9900
MI096	WM330	MI3071	0.0375532	4.27253	1.93269e-05	0.019594	23140	10720	9944
WM340	MI096	MI3071	0.0100575	1.41385	0.157407	0.00504949	23748	10093	9892
WM436	MI096	MI3071	0.0297834	4.88407	1.03918e-06	0.0147886	23764	10269	9675
WM441	MI096	MI3071	0.0200792	2.44024	0.0146774	0.0072471	37825	7341	7052
WM442	MI096	MI3071	0.00258435	0.29024	0.771632	0.000908334	38724	6983	6947
WM561	MI096	MI3071	0.00324605	0.437847	0.661497	0.00115166	37826	6954	6909
WM562	MI096	MI3071	0.0141025	1.41546	0.156933	0.00500642	38546	7155	6956
WM563	MI096	MI3071	0.0412604	4.58839	4.46678e-06	0.0154629	27610	5981	5507
MI3071	WM579	MI096	0.0933953	10.8104	2.3e-16	0.0169709	30737	6357	5271
MI3071	WM580	MI096	0.104183	13.0531	2.3e-16	0.018984	30705	6428	5215
MI3071	WM581	MI096	0.0945392	8.95473	2.3e-16	0.0173182	30873	6414	5306
XJ160	MI096	MI3071	0.0123352	1.68876	0.0912649	0.00437593	38651	7140	6966
MI375	MI096	MI3076	0.0118973	1.90385	0.0569298	0.00829413	28150	14544	14202
MI096	MI377	MI3076	0.00103937	0.168961	0.865827	0.000736553	31505	16373	16339
MI3076	MI096	MI605	0.0280155	3.8035	0.000142665	0.0159339	17788	8770	8292
MI3076	MI096	MI711	0.0388073	5.5336	3.1373e-08	0.0146004	38614	13866	12830
MI3076	MI096	MI722	0.0413715	4.72853	2.26156e-06	0.0160961	28121	9628	8863
MI894	MI096	MI3076	0.0088622	1.22637	0.220059	0.00618501	29624	15539	15266
MI096	WM009	MI3076	0.0257644	4.97712	6.45367e-07	0.0183174	35002	17060	16203
WM056	MI096	MI3076	0.00792114	1.27873	0.200991	0.00579002	32826	17178	16908
MI3076	MI096	WM329	0.0751604	11.9544	2.3e-16	0.0338051	29061	20363	17516
MI3076	MI096	WM330	0.0776033	14.318	2.3e-16	0.0351018	29182	20593	17627
MI3076	MI096	WM340	0.0814653	16.3079	2.3e-16	0.0388922	28832	20842	17702
MI3076	MI096	WM436	0.0845891	20.3622	2.3e-16	0.0425066	29102	20765	17526
MI096	WM441	MI3076	0.0194834	4.64217	3.44768e-06	0.01418	34105	17346	16683
MI096	WM442	MI3076	0.0388533	6.80855	9.859e-12	0.0276471	35268	17286	15993
MI096	WM561	MI3076	0.0316854	6.63053	3.34477e-11	0.0227661	34437	17143	16090
MI096	WM562	MI3076	0.0270808	6.89878	5.24514e-12	0.0192427	34966	17048	16149
WM563	MI096	MI3076	0.0477469	7.30781	2.71561e-13	0.0338347	25629	14439	13123
MI3076	MI096	WM579	0.0344425	5.01051	5.42854e-07	0.0120294	40004	14161	13218
MI3076	MI096	WM580	0.0310046	4.48161	7.40825e-06	0.0108815	39837	14116	13267
MI3076	MI096	WM581	0.0328861	5.48009	4.251e-08	0.0115628	39979	14165	13263
MI096	XJ160	MI3076	0.0348068	6.27054	3.59792e-10	0.024868	35142	17288	16125
MI377	MI375	MI096	0.00442177	0.833248	0.404705	0.00331858	18547	17718	17562
MI375	MI096	MI605	0.00210902	0.190518	0.848903	0.0010163	20842	6177	6151
MI375	MI096	MI711	0.00944824	1.28331	0.199385	0.00290899	45280	9669	9488
MI375	MI096	MI722	0.0154472	1.51378	0.130081	0.004956	32611	6738	6533
MI894	MI375	MI096	0.0182556	2.63067	0.00852167	0.0112309	21800	14056	13552
WM009	MI096	MI375	0.0150118	3.13718	0.0017058	0.0115623	21086	18222	17683
MI375	WM056	MI096	0.00287045	0.624271	0.53245	0.00225609	19504	18517	18411
MI096	MI375	WM329	0.00499371	0.732589	0.463809	0.00191376	35466	13987	13848
MI096	MI375	WM330	0.0114306	1.65104	0.0987295	0.00436825	35385	14069	13751
MI096	MI375	WM340	0.00276989	0.404377	0.685936	0.00112617	35090	14119	14041
MI096	MI375	WM436	0.00485818	0.848757	0.396017	0.00209414	35265	14065	13929
MI375	WM441	MI096	0.0428431	12.5455	2.3e-16	0.0340087	19958	19631	18018
WM442	MI096	MI375	0.0163524	2.85637	0.00428517	0.0126064	21535	18273	17685
MI096	WM561	MI375	0.00509978	1.14148	0.253671	0.0040365	20647	18132	17948
WM562	MI096	MI375	0.0157123	4.26294	2.01757e-05	0.0121349	21108	18262	17697
WM563	MI375	MI096	0.043014	7.37181	1.6831e-13	0.0327099	14756	15628	14339
MI375	MI096	WM579	0.0107364	1.34365	0.179062	0.0030734	46825	9979	9767
MI375	MI096	WM580	0.0115478	1.48969	0.136307	0.00331323	46724	9986	9758
MI375	MI096	WM581	0.0128342	1.63993	0.101019	0.0036808	46806	9983	9730
XJ160	MI096	MI375	0.0165621	3.03041	0.0024422	0.0128403	21453	18383	17784
MI096	MI377	MI605	0.0118472	1.08749	0.276822	0.0057031	24062	7217	7048
MI377	MI096	MI711	0.000276141	0.0354367	0.971731	8.52903e-05	50920	10867	10861
MI377	MI096	MI722	0.00684211	0.743607	0.457114	0.00220059	36850	7652	7548
MI894	MI377	MI096	0.00506444	0.653969	0.513132	0.00374822	19963	18754	18565
WM009	MI096	MI377	0.0185482	3.29893	0.000970541	0.0141187	24104	20620	19869
MI377	WM056	MI096	0.00909823	2.25376	0.0242114	0.00704491	22802	20685	20312
MI096	MI377	WM329	0.0199044	3.18243	0.00146046	0.00768329	39686	16115	15486
MI096	MI377	WM330	0.0190934	2.89055	0.00384566	0.00736424	39651	16119	15515
MI096	MI377	WM340	0.0115714	2.42791	0.0151862	0.00472629	39281	16129	15760
MI096	MI377	WM436	0.0162314	2.49394	0.0126333	0.00707431	39553	16247	15728
MI377	WM441	MI096	0.0502721	9.42775	2.3e-16	0.0390514	23396	21811	19723
WM442	MI096	MI377	0.0122401	2.0851	0.0370601	0.00935516	24402	20468	19973
MI096	WM561	MI377	0	0	1	0	23481	20340	20340
WM562	MI096	MI377	0.0132939	2.49186	0.0127077	0.0101875	24015	20542	20003
WM563	MI377	MI096	0.035571	7.44008	1.00586e-13	0.0267002	17201	17293	16105
MI096	MI377	WM579	0.00192488	0.215551	0.829338	0.000552188	52617	11191	11148
MI096	MI377	WM580	0.00102674	0.127783	0.898321	0.000296445	52493	11212	11189
MI096	MI377	WM581	0.00278426	0.348325	0.727596	0.000799402	52528	11165	11103
XJ160	MI096	MI377	0.0189989	3.30026	0.000965953	0.014514	24343	20703	19931
MI605	MI096	MI711	0.0737043	11.758	2.3e-16	0.0345072	13792	9571	8257
MI605	MI096	MI722	0.0718374	8.90833	2.3e-16	0.0353659	9368	6274	5433
MI894	MI096	MI605	0.000981206	0.0925954	0.926225	0.000467575	22369	6631	6618
WM009	MI096	MI605	0.019775	2.74365	0.00607603	0.00930982	26491	7297	7014
MI096	WM056	MI605	0.0154803	1.78262	0.0746487	0.00785657	24748	7675	7441
MI605	WM329	MI096	0.202964	23.0692	2.3e-16	0.0936938	16045	12663	8390
MI605	WM330	MI096	0.201042	26.1331	2.3e-16	0.0928311	16067	12683	8437
MI605	WM340	MI096	0.21845	24.2726	2.3e-16	0.100442	16074	12812	8218
MI605	WM436	MI096	0.208678	25.0384	2.3e-16	0.0960032	15914	12702	8316
MI096	WM441	MI605	0.00279776	0.350603	0.725886	0.00139572	25777	7527	7485
MI096	WM442	MI605	0.0112533	1.54355	0.122698	0.00531756	26477	7189	7029
MI096	WM561	MI605	0.00279799	0.30621	0.759444	0.00134644	25872	7168	7128
MI096	WM562	MI605	0.0069512	0.77606	0.437714	0.00332579	26234	7243	7143
MI096	WM563	MI605	0.0203156	2.43912	0.0147231	0.010473	18491	6077	5835
MI605	MI096	WM579	0.0620176	9.30031	2.3e-16	0.0272101	14431	9838	8689
MI605	MI096	WM580	0.066113	9.5186	2.3e-16	0.0290143	14433	9885	8659
MI605	MI096	WM581	0.0667099	10.938	2.3e-16	0.0292412	14425	9874	8639
MI096	XJ160	MI605	0.00430735	0.543994	0.586446	0.00205987	26466	7228	7166
MI722	MI711	MI096	0.0316975	2.42303	0.0153919	0.00391629	36757	4215	3956
MI894	MI096	MI711	0.0162696	2.19523	0.0281474	0.00502971	48019	10494	10158
WM009	MI096	MI711	0.0135759	1.89829	0.0576578	0.00419264	55287	11199	10899
WM056	MI096	MI711	0.026873	3.40729	0.00065612	0.00861451	52402	11712	11099
MI096	WM329	MI711	0.0555266	7.72453	1.13243e-14	0.0255007	31910	17232	15419
MI096	WM330	MI711	0.0509648	5.94924	2.69391e-09	0.0233554	32165	17157	15493
WM340	MI096	MI711	0.00294836	0.399315	0.689661	0.00130362	33090	15818	15725
WM436	MI096	MI711	0.0414209	9.31246	2.3e-16	0.017918	33194	16330	15031
WM441	MI096	MI711	0.0157361	2.05369	0.0400058	0.00494593	54109	11425	11071
WM442	MI096	MI711	0.000914244	0.106724	0.915008	0.000280741	55470	10948	10928
WM561	MI096	MI711	0.0105205	1.66835	0.0952471	0.00324303	54337	10998	10769
WM562	MI096	MI711	0.00893183	1.23398	0.217212	0.00274721	55117	11070	10874
WM563	MI096	MI711	0.0419882	6.07567	1.23472e-09	0.0137163	41035	9790	9001
WM579	MI711	MI096	0.0611193	5.41698	6.06127e-08	0.00702646	57351	5764	5100
WM580	MI711	MI096	0.0532753	5.11205	3.18673e-07	0.00609795	57337	5684	5109
WM581	MI711	MI096	0.0591586	4.74086	2.12814e-06	0.00681712	57278	5765	5121
XJ160	MI096	MI711	0.00493146	0.5474	0.584104	0.00152796	55410	11106	10997
MI894	MI096	MI722	0.0188888	2.00688	0.044763	0.00611888	34758	7363	7090
WM009	MI096	MI722	0.0393996	4.99387	5.91805e-07	0.012573	40126	8033	7424
WM056	MI096	MI722	0.0391688	3.314	0.000919705	0.0129767	38035	8251	7629
MI096	WM329	MI722	0.0421652	4.36802	1.25376e-05	0.020018	23377	11802	10847
MI096	WM330	MI722	0.0401823	3.8545	0.000115967	0.0191749	23617	11869	10952
WM340	MI096	MI722	0.0137423	1.33629	0.181456	0.00627546	24242	11139	10837
WM436	MI096	MI722	0.0510633	7.36721	1.74305e-13	0.0231203	24374	11640	10509
WM441	MI096	MI722	0.029741	3.10762	0.00188598	0.00963371	39266	8050	7585
WM442	MI096	MI722	0.0158939	1.92493	0.0542385	0.00503632	40258	7734	7492
WM561	MI096	MI722	0.0206614	2.31702	0.0205028	0.00658171	39484	7731	7418
WM562	MI096	MI722	0.0164169	1.97124	0.0486962	0.00524891	39937	7801	7549
WM563	MI096	MI722	0.0568347	6.69172	2.20557e-11	0.0194655	29536	6908	6165
WM579	MI722	MI096	0.0208426	2.00667	0.0447848	0.00278304	38435	4604	4416
WM580	MI722	MI096	0.00773283	0.942111	0.346136	0.00102451	38289	4496	4427
WM581	MI722	MI096	0.0157842	1.39131	0.164132	0.0020892	38456	4537	4396
XJ160	MI096	MI722	0.0227819	2.07022	0.0384321	0.00728927	40162	7879	7528
WM009	MI096	MI894	0.0123437	3.15408	0.00161006	0.009509	22873	19314	18843
MI894	WM056	MI096	0.0168426	2.58647	0.00969656	0.0130224	20841	19893	19234
MI096	MI894	WM329	0.00819535	1.1028	0.270115	0.00315356	37507	15070	14825
MI096	MI894	WM330	0.00816163	1.16062	0.245798	0.00313403	37463	15070	14826
MI894	MI096	WM340	0.000993641	0.135355	0.892331	0.000405077	37106	15111	15081
MI096	MI894	WM436	0.00172608	0.318767	0.749903	0.000747277	37329	15089	15037
MI894	WM441	MI096	0.0544297	10.7564	2.3e-16	0.0428753	21601	21203	19014
WM442	MI096	MI894	0.0133977	2.8653	0.00416619	0.0103122	23292	19326	18815
MI096	WM561	MI894	0.0103302	1.77868	0.0752918	0.00818152	22256	19414	19017
WM562	MI096	MI894	0.014934	2.87815	0.00400019	0.0115226	22931	19403	18832
WM563	MI894	MI096	0.0287596	3.68467	0.000228997	0.0217675	15764	16401	15484
MI894	MI096	WM579	0.0147876	2.23714	0.0252771	0.00424473	49655	10774	10460
MI894	MI096	WM580	0.0166289	2.44226	0.0145958	0.0047721	49523	10760	10408
MI894	MI096	WM581	0.017592	3.13016	0.00174712	0.00503983	49636	10759	10387
XJ160	MI096	MI894	0.0122755	1.88513	0.0594121	0.00951285	23164	19420	18949
WM009	MI096	WM056	0.00848656	1.61946	0.105348	0.0057241	24434	21390	21030
MI096	WM009	WM329	0.0209075	4.1735	2.99962e-05	0.00793259	43408	16065	15407
MI096	WM009	WM330	0.0214951	3.35137	0.000804123	0.00810944	43295	16015	15341
MI096	WM009	WM340	0.0228945	4.22764	2.36154e-05	0.00920459	42874	16263	15535
MI096	WM009	WM436	0.0126598	2.89435	0.00379944	0.0053958	43311	16038	15637
MI096	WM009	WM441	0.00773079	1.31097	0.189867	0.00533978	23215	22160	21820
WM009	WM442	MI096	0.0134324	2.18839	0.0286416	0.00949467	31928	18145	17664
WM561	WM009	MI096	0.006657	1.12465	0.260735	0.00492132	29541	18751	18503
WM009	WM562	MI096	0.000161777	0.0278783	0.977759	0.000118537	30515	18547	18541
WM009	MI096	WM563	0.0047422	0.782783	0.433754	0.00346227	20766	16632	16475
MI096	WM009	WM579	0.0362708	4.62624	3.72363e-06	0.0104448	56492	11771	10947
MI096	WM009	WM580	0.0337571	5.249	1.52928e-07	0.00979444	56415	11790	11020
MI096	WM009	WM581	0.03509	4.99519	5.87779e-07	0.0101434	56474	11755	10958
WM009	XJ160	MI096	0.00527567	0.790708	0.429114	0.00380986	31403	18388	18195
MI096	WM056	WM329	0.0638591	8.32149	2.3e-16	0.0259475	40309	17759	15627
MI096	WM056	WM330	0.0658486	9.51331	2.3e-16	0.0268704	40327	17894	15683
MI096	WM056	WM340	0.0595693	8.65234	2.3e-16	0.0256816	39907	17885	15874
MI096	WM056	WM436	0.0531578	9.43403	2.3e-16	0.0244148	40368	17801	16004
WM056	WM441	MI096	0.0390564	8.20936	2.3e-16	0.0311795	25156	22068	20409
WM442	MI096	WM056	0.018218	2.72588	0.00641299	0.0121697	25023	21518	20748
MI096	WM561	WM056	0.000329629	0.0562165	0.955169	0.000226281	23988	21243	21229
WM562	MI096	WM056	0.00473019	0.871701	0.383371	0.00320861	24357	21347	21146
WM563	WM056	MI096	0.0489692	13.1855	2.3e-16	0.0371882	19216	17758	16100
MI096	WM056	WM579	0.0126024	1.38185	0.167018	0.0038015	53705	11932	11635
MI096	WM056	WM580	0.010125	1.22797	0.219458	0.00307076	53619	11922	11683
MI096	WM056	WM581	0.00966675	1.14968	0.250275	0.00292905	53718	11907	11679
XJ160	MI096	WM056	0.0213478	2.97728	0.00290816	0.0142889	24885	21673	20767
WM329	WM330	MI096	0.00376484	0.629618	0.528944	0.00132391	52222	13864	13760
WM329	WM340	MI096	0.023458	4.13216	3.59373e-05	0.00934318	45530	16012	15278
WM329	WM436	MI096	0.0107074	1.79413	0.0727921	0.00472666	40891	17510	17139
MI096	WM441	WM329	0.0498402	6.51648	7.19758e-11	0.0195643	42064	17083	15461
MI096	WM442	WM329	0.0289878	4.22037	2.43903e-05	0.0108912	43572	16027	15124
MI096	WM561	WM329	0.0219127	3.22104	0.00127726	0.00836279	42763	15996	15310
MI096	WM562	WM329	0.0255387	3.91626	8.99333e-05	0.00973171	43342	16183	15377
MI096	WM563	WM329	0.0508059	7.55263	4.26326e-14	0.0210789	31661	14571	13162
MI096	WM329	WM579	0.090807	12.9597	2.3e-16	0.0390391	32818	18457	15384
MI096	WM329	WM580	0.0916252	12.4734	2.3e-16	0.0394432	32652	18431	15337
MI096	WM329	WM581	0.0872893	14.2607	2.3e-16	0.0375226	32787	18323	15381
MI096	XJ160	WM329	0.0186617	3.287	0.0010126	0.00704319	43528	15939	15355
WM330	WM340	MI096	0.0197697	3.05694	0.00223607	0.0078591	45259	15939	15321
WM330	WM436	MI096	0.0075616	1.1339	0.256837	0.00334746	40915	17522	17259
MI096	WM441	WM330	0.0437717	6.94991	3.6553e-12	0.0171804	42148	17014	15587
MI096	WM442	WM330	0.026475	3.87074	0.000108503	0.00995402	43625	16032	15205
MI096	WM561	WM330	0.0233421	3.98991	6.60992e-05	0.00887657	42682	16002	15272
MI096	WM562	WM330	0.0166041	2.69037	0.00713719	0.00628999	43385	15980	15458
MI096	WM563	WM330	0.051259	6.52676	6.72091e-11	0.0212502	31695	14592	13169
MI096	WM330	WM579	0.0880516	11.0634	2.3e-16	0.0377126	32993	18381	15406
MI096	WM330	WM580	0.0843673	10.3198	2.3e-16	0.0362431	32932	18309	15460
MI096	WM330	WM581	0.0844108	11.4359	2.3e-16	0.0363134	33027	18326	15473
MI096	XJ160	WM330	0.0141356	2.49054	0.0127548	0.00534457	43611	15927	15483
WM436	WM340	MI096	0.0107508	1.79226	0.0730911	0.00469957	41254	17299	16931
MI096	WM441	WM340	0.0446026	7.02158	2.1938e-12	0.0186328	41710	17249	15776
MI096	WM442	WM340	0.0262451	3.72093	0.000198494	0.0105122	43223	16247	15416
MI096	WM561	WM340	0.0173608	2.75846	0.00580751	0.00701705	42329	16086	15537
MI096	WM562	WM340	0.0179942	3.06312	0.0021904	0.00724344	42923	16180	15608
MI096	WM563	WM340	0.0543104	7.7334	1.04361e-14	0.0239243	31330	14841	13312
MI096	WM340	WM579	0.0368987	5.33112	9.76079e-08	0.0152752	33924	16931	15726
MI096	WM340	WM580	0.033974	4.57315	4.80455e-06	0.0141207	33867	16891	15781
MI096	WM340	WM581	0.0324687	4.69518	2.66377e-06	0.0134153	33871	16758	15704
MI096	XJ160	WM340	0.0166881	3.51313	0.000442855	0.00671718	43163	16175	15644
MI096	WM441	WM436	0.0307294	5.20242	1.96715e-07	0.0135834	42192	16922	15913
MI096	WM442	WM436	0.024769	5.12918	2.91012e-07	0.0106087	43654	16301	15513
MI096	WM561	WM436	0.0204198	4.40365	1.06443e-05	0.00880069	42623	16166	15519
MI096	WM562	WM436	0.0231917	4.54529	5.48586e-06	0.00997143	43221	16324	15584
MI096	WM563	WM436	0.0466588	7.74383	9.54792e-15	0.0217809	31560	14637	13332
WM436	MI096	WM579	0.0240297	5.39462	6.86703e-08	0.00976008	34373	16556	15779
WM436	MI096	WM580	0.0211449	4.15455	3.25933e-05	0.00862015	34189	16492	15809
WM436	MI096	WM581	0.0242193	5.11212	3.18568e-07	0.00985004	34303	16514	15733
MI096	XJ160	WM436	0.0148316	3.217	0.00129538	0.00635357	43520	16148	15676
MI096	WM442	WM441	0.00668273	1.23452	0.217009	0.00461901	23726	22144	21850
MI096	WM561	WM441	0.13386	24.399	2.3e-16	0.0986837	21217	26322	20107
MI096	WM562	WM441	0.0103929	1.71799	0.0857987	0.00725025	23346	22409	21948
WM563	WM441	MI096	0.0844857	15.2642	2.3e-16	0.065537	19268	18940	15989
MI096	WM441	WM579	0.0361394	4.74487	2.08639e-06	0.0106649	55351	12056	11215
MI096	WM441	WM580	0.0316197	3.9267	8.61177e-05	0.00935364	55253	11990	11255
MI096	WM441	WM581	0.0314916	4.59022	4.42784e-06	0.00928331	55312	11939	11210
XJ160	MI096	WM441	0.00875561	1.59009	0.111813	0.00602984	23814	22236	21850
WM561	WM442	MI096	0.0215734	4.48078	7.43691e-06	0.0144907	33681	17284	16554
WM562	WM442	MI096	0.0131231	2.50248	0.0123326	0.00940842	31711	18374	17898
WM442	MI096	WM563	0.00912938	1.54372	0.122656	0.00664218	21083	16691	16389
MI096	WM442	WM579	0.0506591	6.41657	1.39378e-10	0.0145701	56772	11915	10766
MI096	WM442	WM580	0.0483294	6.39414	1.61452e-10	0.0139345	56635	11876	10781
MI096	WM442	WM581	0.0422997	5.92919	3.04441e-09	0.0121597	56784	11766	10811
XJ160	WM442	MI096	0.0106073	1.61356	0.106623	0.00584819	41612	14053	13758
WM561	WM562	MI096	0.00682979	1.49293	0.135456	0.00504659	29850	18722	18468
MI096	WM561	WM563	0.021553	5.04834	4.45654e-07	0.0160912	20183	17063	16343
MI096	WM561	WM579	0.0228485	3.64405	0.000268386	0.00659448	55771	11505	10991
MI096	WM561	WM580	0.0233923	3.44498	0.0005711	0.00677259	55650	11506	10980
MI096	WM561	WM581	0.0158136	2.36232	0.0181608	0.00457362	55795	11402	11047
WM561	XJ160	MI096	0.0121341	3.08069	0.00206525	0.00824034	33466	17308	16893
MI096	WM562	WM563	0.00716207	1.35253	0.176206	0.00525056	20592	16664	16427
MI096	WM562	WM579	0.0301556	4.0464	5.20105e-05	0.00865823	56449	11649	10967
MI096	WM562	WM580	0.0310248	4.41344	1.01739e-05	0.00899317	56369	11731	11025
MI096	WM562	WM581	0.0264088	3.4246	0.00061571	0.0076222	56476	11621	11023
WM562	XJ160	MI096	0.00498142	0.889716	0.373618	0.00357828	31583	18258	18077
WM563	MI096	WM579	0.0206918	2.74075	0.00612985	0.00636016	42229	9915	9513
WM563	MI096	WM580	0.0225835	2.81393	0.004894	0.00696019	42185	9939	9500
WM563	MI096	WM581	0.0223258	3.28255	0.00102872	0.00683747	42199	9868	9437
XJ160	MI096	WM563	0.00599199	0.857698	0.391059	0.00438674	20989	16705	16506
WM579	WM580	MI096	0.00832702	1.10308	0.269991	0.000915656	61647	5328	5240
WM579	WM581	MI096	0.00249808	0.249952	0.802624	0.000270225	61619	5217	5191
MI096	XJ160	WM579	0.0294492	3.26749	0.00108505	0.00851048	56777	11728	11057
WM581	WM580	MI096	0.00572179	0.58538	0.558292	0.000635	61074	5361	5300
MI096	XJ160	WM580	0.0282634	3.41807	0.000630661	0.0082084	56655	11733	11088
MI096	XJ160	WM581	0.0256545	3.43199	0.000599171	0.0074491	56799	11694	11109
MI1081	MI2950	MI3071	0.0023	0.366124	0.714273	0.00118563	24448	11984	11929
MI3076	MI1081	MI2950	0.0285786	4.47789	7.53833e-06	0.015805	33815	20515	19375
MI1081	MI375	MI2950	0.0358534	5.13008	2.89623e-07	0.0188374	35242	17147	15960
MI1081	MI377	MI2950	0.0475962	9.4717	2.3e-16	0.0250442	40146	19633	17849
MI605	MI2950	MI1081	0.116046	19.0324	2.3e-16	0.0511214	20192	11257	8916
MI2950	MI1081	MI711	0.0141349	2.47279	0.0134062	0.00633627	33706	18690	18169
MI2950	MI1081	MI722	0.0173319	2.65446	0.00794353	0.00799767	24306	12884	12445
MI1081	MI894	MI2950	0.0346116	4.9247	8.44887e-07	0.0180979	37959	18279	17056
MI1081	WM009	MI2950	0.0142742	2.0033	0.0451448	0.00760746	43021	19505	18956
MI1081	WM056	MI2950	0.0523956	8.40989	2.3e-16	0.0290917	41194	20889	18809
MI2950	WM329	MI1081	0.0794414	10.9218	2.3e-16	0.0406709	40726	21992	18755
MI2950	WM330	MI1081	0.0856568	14.0265	2.3e-16	0.0437546	40915	22117	18627
MI2950	WM340	MI1081	0.101573	15.0546	2.3e-16	0.0514122	41020	22238	18137
MI2950	WM436	MI1081	0.0875965	15.6438	2.3e-16	0.0442752	40638	21908	18379
MI1081	WM441	MI2950	0.0387509	6.6053	3.96707e-11	0.0209171	42852	20225	18716
MI1081	WM442	MI2950	0.0194236	2.77666	0.00549211	0.0103131	43242	19524	18780
MI1081	WM561	MI2950	0.027017	4.04997	5.12234e-05	0.0142395	42778	19311	18295
MI1081	WM562	MI2950	0.0225062	3.02341	0.00249943	0.0118777	42799	19445	18589
MI1081	WM563	MI2950	0.0370834	5.50989	3.59064e-08	0.0206168	31880	16584	15398
MI2950	MI1081	WM579	0.0101957	1.97469	0.0483038	0.00423915	35128	19073	18688
MI2950	MI1081	WM580	0.00820303	1.49109	0.135939	0.00341297	35070	18989	18680
MI2950	MI1081	WM581	0.0130104	2.06008	0.0393912	0.00541799	35159	19115	18624
MI1081	XJ160	MI2950	0.0194449	2.83564	0.00457342	0.0103134	43271	19503	18759
MI1081	MI3076	MI3071	0.0104968	2.09452	0.0362134	0.00453952	44288	14392	14093
MI1081	MI375	MI3071	0.0174965	2.35511	0.018517	0.00693426	45017	11689	11287
MI1081	MI377	MI3071	0.0308384	7.1244	1.04539e-12	0.0121862	51156	13421	12618
MI605	MI1081	MI3071	0.00448649	0.639962	0.522197	0.00242975	17819	10299	10207
MI3071	MI711	MI1081	0.125	15.4489	2.3e-16	0.0246851	50142	10143	7889
MI3071	MI722	MI1081	0.102424	15.095	2.3e-16	0.0199247	35415	6867	5591
MI1081	MI894	MI3071	0.0237971	3.07511	0.00210428	0.00948103	48370	12713	12122
MI1081	WM009	MI3071	0.0123484	2.20858	0.0272039	0.00503707	54153	13814	13477
MI1081	WM056	MI3071	0.0103763	2.36273	0.0181408	0.00428848	52454	13827	13543
MI1081	WM329	MI3071	0.0592077	8.74077	2.3e-16	0.0309621	37471	18489	16422
MI1081	WM330	MI3071	0.0614512	8.50201	2.3e-16	0.0319143	37729	18439	16304
MI1081	WM340	MI3071	0.0196505	4.08235	4.45829e-05	0.0099849	38702	17331	16663
WM436	MI1081	MI3071	0.00677054	1.5868	0.112558	0.00341439	38430	17026	16797
MI1081	WM441	MI3071	0.0158241	2.68898	0.00716707	0.00644515	53895	13834	13403
MI1081	WM442	MI3071	0.021764	3.26562	0.00109224	0.00880669	54243	13826	13237
MI1081	WM561	MI3071	0.031217	5.97218	2.34098e-09	0.0125363	53661	13676	12848
MI1081	WM562	MI3071	0.0223633	3.60782	0.000308782	0.00907335	54101	13852	13246
MI1081	WM563	MI3071	0.000817884	0.12019	0.904333	0.000345602	40154	11013	10995
MI3071	WM579	MI1081	0.0844231	11.0229	2.3e-16	0.0173468	52409	10366	8752
MI3071	WM580	MI1081	0.0905688	14.4244	2.3e-16	0.0187417	52390	10488	8746
MI3071	WM581	MI1081	0.0896236	10.9617	2.3e-16	0.0185289	52570	10480	8756
MI1081	XJ160	MI3071	0.02195	3.98563	6.7302e-05	0.00889773	54282	13851	13256
MI1081	MI375	MI3076	0.0330168	6.80492	1.01104e-11	0.025641	35473	26704	24997
MI1081	MI377	MI3076	0.0401669	7.73255	1.04361e-14	0.0311333	39580	29910	27600
MI3076	MI1081	MI605	0.0260031	4.2367	2.26825e-05	0.0151282	29106	15112	14346
MI1081	MI3076	MI711	0.00374142	1.02687	0.304481	0.00140804	59731	21194	21036
MI3076	MI1081	MI722	0.00146014	0.287193	0.773965	0.000568652	44698	15089	15045
MI1081	MI894	MI3076	0.0304736	4.69003	2.7316e-06	0.0237036	37685	28371	26693
MI1081	WM009	MI3076	0.0622142	11.5837	2.3e-16	0.0498043	42479	31936	28195
MI1081	WM056	MI3076	0.0360265	7.78216	7.10543e-15	0.0292088	41188	31288	29112
MI3076	MI1081	WM329	0.0339048	6.98591	2.83018e-12	0.0154647	44531	30845	28822
MI3076	MI1081	WM330	0.0376173	8.85046	2.3e-16	0.0171187	44401	31059	28807
MI3076	MI1081	WM340	0.0429485	8.59259	2.3e-16	0.020545	43787	31411	28824
MI3076	MI1081	WM436	0.0376277	7.65444	1.93179e-14	0.0190141	44385	31037	28786
MI1081	WM441	MI3076	0.0588878	13.3329	2.3e-16	0.0473444	42557	31962	28407
MI1081	WM442	MI3076	0.0713846	12.6724	2.3e-16	0.0571113	42694	32186	27897
MI1081	WM561	MI3076	0.0700337	15.7594	2.3e-16	0.0555869	42404	31589	27454
MI1081	WM562	MI3076	0.062409	14.384	2.3e-16	0.0496975	42640	31740	28011
WM563	MI1081	MI3076	0.00048352	0.113337	0.909764	0.000392195	32572	24830	24806
MI1081	MI3076	WM579	0.0036196	0.971852	0.331124	0.00126907	61775	21766	21609
MI1081	MI3076	WM580	0.00594041	1.56496	0.117592	0.00208536	61537	21760	21503
MI1081	MI3076	WM581	0.00413787	1.02667	0.304575	0.00145127	61694	21719	21540
MI1081	XJ160	MI3076	0.0685636	11.4453	2.3e-16	0.0546847	42834	31996	27890
MI375	MI377	MI1081	0.00651015	1.37477	0.169204	0.00462782	38799	24737	24417
MI1081	MI375	MI605	0.0100748	1.79141	0.0732274	0.00551664	29763	12081	11840
MI1081	MI375	MI711	0.0380903	6.22858	4.70668e-10	0.0131097	61558	17960	16642
MI1081	MI375	MI722	0.0274023	4.02252	5.75791e-05	0.00984338	45514	12654	11979
MI894	MI375	MI1081	0.00347006	0.645051	0.518894	0.00203033	43861	19375	19241
MI375	WM009	MI1081	0.0405685	10.6937	2.3e-16	0.0313883	38437	28189	25991
MI375	WM056	MI1081	0.00640333	1.47955	0.138993	0.00478069	40860	26090	25758
MI1081	MI375	WM329	0.0502802	8.92257	2.3e-16	0.0217386	46564	26330	23809
MI1081	MI375	WM330	0.0523767	8.82236	2.3e-16	0.0226703	46399	26512	23873
MI1081	MI375	WM340	0.045937	8.34404	2.3e-16	0.0210241	45868	26560	24227
MI1081	MI375	WM436	0.0576101	11.915	2.3e-16	0.0278845	46283	26711	23801
MI375	WM441	MI1081	0.0408179	8.46863	2.3e-16	0.0304567	41466	27182	25050
MI375	WM442	MI1081	0.0502916	9.98877	2.3e-16	0.0391725	38242	28632	25890
MI375	WM561	MI1081	0.0591356	16.8287	2.3e-16	0.0453359	38478	28146	25003
MI375	WM562	MI1081	0.0471245	9.24521	2.3e-16	0.0363259	38187	28231	25690
WM563	MI375	MI1081	0.0371508	8.35334	2.3e-16	0.0268981	31417	21957	20384
MI1081	MI375	WM579	0.0304206	6.23226	4.59758e-10	0.00975575	63744	18325	17243
MI1081	MI375	WM580	0.0309307	5.47778	4.30683e-08	0.00994804	63587	18315	17216
MI1081	MI375	WM581	0.030911	5.27261	1.34495e-07	0.00994341	63653	18343	17243
MI375	XJ160	MI1081	0.0529652	13.5216	2.3e-16	0.0413035	38171	28737	25846
MI1081	MI377	MI605	0.0155124	2.30034	0.0214292	0.0084581	34251	13813	13391
MI1081	MI377	MI711	0.046837	13.6425	2.3e-16	0.0160608	69186	20205	18397
MI1081	MI377	MI722	0.0405869	6.00353	1.93079e-09	0.0144527	51554	14396	13273
MI894	MI377	MI1081	0.00718676	1.39206	0.163903	0.00507359	41116	26137	25764
MI377	WM009	MI1081	0.036147	8.41501	2.3e-16	0.0283573	42446	31560	29358
MI377	WM056	MI1081	0.00171485	0.391775	0.695224	0.00127235	46720	28623	28525
MI1081	MI377	WM329	0.0663815	18.4843	2.3e-16	0.028807	52047	29920	26195
MI1081	MI377	WM330	0.0645494	21.854	2.3e-16	0.0279646	51859	29933	26303
MI1081	MI377	WM340	0.0600239	15.5569	2.3e-16	0.0275568	51322	30128	26716
MI1081	MI377	WM436	0.0703715	19.078	2.3e-16	0.0339854	51715	30124	26163
MI377	WM441	MI1081	0.0359215	6.04932	1.45454e-09	0.0263961	47558	29545	27496
MI377	WM442	MI1081	0.0445761	7.42311	1.14353e-13	0.0348893	42529	31729	29021
MI377	WM561	MI1081	0.0495016	10.6386	2.3e-16	0.0385111	42740	31378	28418
MI377	WM562	MI1081	0.0416371	7.0839	1.40155e-12	0.0325093	42476	31534	29013
WM563	MI377	MI1081	0.0422794	9.96735	2.3e-16	0.0302035	36211	24381	22403
MI1081	MI377	WM579	0.0425661	12.0746	2.3e-16	0.0136046	71447	20672	18984
MI1081	MI377	WM580	0.0430458	10.2565	2.3e-16	0.0137914	71264	20657	18952
MI1081	MI377	WM581	0.0426264	11.645	2.3e-16	0.0136113	71310	20595	18911
MI377	XJ160	MI1081	0.0465242	9.47095	2.3e-16	0.0365574	42027	31908	29071
MI605	MI1081	MI711	0.0331691	6.46924	9.84979e-11	0.0154488	23922	15621	14618
MI605	MI1081	MI722	0.0406096	5.39542	6.83619e-08	0.019593	16626	10583	9757
MI1081	MI894	MI605	0.00688162	0.944849	0.344736	0.00377695	32252	13022	12844
WM009	MI1081	MI605	0.000883611	0.114744	0.908648	0.000493194	36666	14159	14134
MI1081	WM056	MI605	0.0273108	5.08523	3.67176e-07	0.0158711	35241	14971	14175
MI605	WM329	MI1081	0.174231	25.7543	2.3e-16	0.0925732	27280	20569	14465
MI605	WM330	MI1081	0.17548	22.5095	2.3e-16	0.0932984	27331	20652	14486
MI605	WM340	MI1081	0.19098	26.3163	2.3e-16	0.1011	27391	20835	14153
MI605	WM436	MI1081	0.178448	32.2984	2.3e-16	0.094051	27164	20505	14295
MI1081	WM441	MI605	0.0148364	2.80107	0.00509331	0.00835275	36493	14467	14044
MI1081	WM442	MI605	0.00806166	1.10232	0.270323	0.00450237	36738	14255	14027
MI1081	WM561	MI605	0.00859144	1.13681	0.255618	0.00475572	36174	13970	13732
MI1081	WM562	MI605	0.0129972	1.95036	0.0511328	0.00723392	36532	14263	13897
MI1081	WM563	MI605	0.0260324	4.0302	5.57285e-05	0.0151454	26627	11765	11168
MI605	MI1081	WM579	0.0297625	5.60963	2.02761e-08	0.0129332	25030	16106	15175
MI605	MI1081	WM580	0.0299539	5.37646	7.59638e-08	0.0130451	24940	16092	15156
MI605	MI1081	WM581	0.0317786	6.24321	4.28694e-10	0.0137985	25009	16104	15112
MI1081	XJ160	MI605	0.00943798	1.22027	0.222363	0.00525225	36792	14225	13959
MI722	MI711	MI1081	0.0279812	3.40899	0.000652029	0.00388922	60908	6668	6305
MI1081	MI894	MI711	0.0399849	6.96084	3.38263e-12	0.013835	65677	19260	17779
MI1081	WM009	MI711	0.0332197	7.48748	7.01661e-14	0.011716	73095	20761	19426
MI1081	WM056	MI711	0.0262161	7.30144	2.84661e-13	0.00944132	70905	20864	19798
MI1081	WM329	MI711	0.0902015	13.4122	2.3e-16	0.041574	49456	28572	23844
MI1081	WM330	MI711	0.0881986	12.2647	2.3e-16	0.0403472	49764	28359	23762
MI1081	WM340	MI711	0.0356909	8.65274	2.3e-16	0.0157887	51272	26102	24303
WM436	MI1081	MI711	0.0066571	2.18626	0.0287964	0.00292482	51161	25253	24919
MI1081	WM441	MI711	0.0366547	8.10204	4.44089e-16	0.0129674	72890	20886	19409
MI1081	WM442	MI711	0.0402868	7.05289	1.75238e-12	0.0141094	73274	20748	19141
MI1081	WM561	MI711	0.0409872	8.02689	1.11022e-15	0.0142934	72702	20458	18847
MI1081	WM562	MI711	0.0409216	9.28024	2.3e-16	0.0143003	72959	20693	19066
MI1081	WM563	MI711	0.00915908	2.17381	0.0297191	0.00335694	56270	17023	16714
WM579	MI711	MI1081	0.0549529	6.08222	1.1853e-09	0.0071131	92267	8850	7928
WM580	MI711	MI1081	0.0495634	6.42562	1.31332e-10	0.00635983	92337	8714	7891
WM581	MI711	MI1081	0.0530578	6.46474	1.01475e-10	0.00687558	92190	8842	7951
MI1081	XJ160	MI711	0.0380211	6.99491	2.65432e-12	0.0132922	73450	20667	19153
MI1081	MI894	MI722	0.0361418	6.3635	1.97201e-10	0.0129694	48867	13675	12721
MI1081	WM009	MI722	0.014914	2.35831	0.0183582	0.0054488	54616	14597	14168
MI1081	WM056	MI722	0.0183846	3.08633	0.0020264	0.00685002	52999	14790	14256
MI1081	WM329	MI722	0.0753903	9.38304	2.3e-16	0.0358279	37036	20077	17262
MI1081	WM330	MI722	0.0768323	9.17944	2.3e-16	0.0364052	37284	20084	17218
MI1081	WM340	MI722	0.0294003	4.69975	2.6048e-06	0.0134641	38300	18557	17497
WM436	MI1081	MI722	0.0158439	3.6162	0.000298963	0.00719424	38375	18273	17703
MI1081	WM441	MI722	0.0252667	4.43265	9.30802e-06	0.00923808	54388	14750	14023
MI1081	WM442	MI722	0.0309069	4.99688	5.82639e-07	0.0112322	54795	14743	13859
MI1081	WM561	MI722	0.0358589	4.88991	1.00881e-06	0.0128577	54255	14458	13457
MI1081	WM562	MI722	0.0336851	6.33108	2.43444e-10	0.0122634	54512	14791	13827
MI1081	WM563	MI722	0.000125791	0.0185143	0.985229	4.80084e-05	41496	11926	11923
WM579	MI722	MI1081	0.0184393	2.64326	0.0082113	0.00276313	63524	7263	7000
WM580	MI722	MI1081	0.00720339	1.17434	0.24026	0.0010744	63426	7131	7029
WM581	MI722	MI1081	0.0152392	1.49304	0.135427	0.00227029	63811	7195	6979
MI1081	XJ160	MI722	0.0279764	3.89455	9.83809e-05	0.0101404	54836	14661	13863
MI894	WM009	MI1081	0.043136	10.625	2.3e-16	0.033718	40229	30349	27839
MI894	WM056	MI1081	0.00799971	1.4158	0.156834	0.00597092	43250	27784	27343
MI1081	MI894	WM329	0.0511832	8.88638	2.3e-16	0.0221732	49603	28075	25341
MI1081	MI894	WM330	0.0530878	10.5906	2.3e-16	0.0230719	49431	28307	25453
MI1081	MI894	WM340	0.0459942	8.51529	2.3e-16	0.0210948	48863	28325	25834
MI1081	MI894	WM436	0.0562474	9.51619	2.3e-16	0.0270842	49153	28243	25235
MI894	WM441	MI1081	0.0415077	7.47844	7.52731e-14	0.030841	43979	28793	26498
MI894	WM442	MI1081	0.0506088	8.79077	2.3e-16	0.0396038	40346	30589	27642
MI894	WM561	MI1081	0.0570236	12.133	2.3e-16	0.0437461	40519	29881	26657
MI894	WM562	MI1081	0.0476388	8.27934	2.3e-16	0.0370261	40133	30271	27518
WM563	MI894	MI1081	0.0371915	5.41566	6.10623e-08	0.0271679	33528	23621	21927
MI1081	MI894	WM579	0.0348562	7.16864	7.57394e-13	0.0112244	67921	19684	18358
MI1081	MI894	WM580	0.0338492	5.61603	1.954e-08	0.0109239	67767	19639	18353
MI1081	MI894	WM581	0.0323276	5.90333	3.56244e-09	0.0104352	67940	19639	18409
MI894	XJ160	MI1081	0.0540067	9.38621	2.3e-16	0.042281	40187	30699	27553
WM056	WM009	MI1081	0.0331044	8.43662	2.3e-16	0.0267194	44671	32487	30405
MI1081	WM009	WM329	0.0651641	13.4905	2.3e-16	0.0286299	55273	30624	26877
MI1081	WM009	WM330	0.0648725	14.2521	2.3e-16	0.0284766	55051	30704	26963
MI1081	WM009	WM340	0.0647625	12.6267	2.3e-16	0.0301141	54371	31016	27243
MI1081	WM009	WM436	0.0651152	13.8168	2.3e-16	0.0319326	55117	30801	27035
WM441	WM009	MI1081	0.00237005	0.489982	0.624147	0.0019078	46861	30874	30728
WM009	WM442	MI1081	0.0103072	2.26411	0.023567	0.00665096	63986	24897	24389
WM009	WM561	MI1081	0.0157519	4.88276	1.04611e-06	0.0106451	59598	25955	25150
WM009	WM562	MI1081	0.00654957	1.30697	0.191221	0.00436326	61392	25588	25255
WM563	WM009	MI1081	0.0757015	17.4213	2.3e-16	0.0592012	35745	27908	23980
MI1081	WM009	WM579	0.066101	13.1996	2.3e-16	0.0218296	74749	22112	19370
MI1081	WM009	WM580	0.0659955	12.9723	2.3e-16	0.0218937	74621	22129	19389
MI1081	WM009	WM581	0.0669434	11.8561	2.3e-16	0.0221475	74672	22106	19332
WM009	XJ160	MI1081	0.0131298	3.23399	0.00122073	0.00862859	62606	25425	24766
MI1081	WM056	WM329	0.101232	24.5264	2.3e-16	0.0465383	52817	32847	26808
MI1081	WM056	WM330	0.102538	25.965	2.3e-16	0.0472965	52711	33107	26949
MI1081	WM056	WM340	0.0977185	29.6293	2.3e-16	0.0476271	52090	33223	27308
MI1081	WM056	WM436	0.0975383	27.3543	2.3e-16	0.0501557	52836	32992	27128
WM056	WM441	MI1081	0.0338417	6.88022	5.97611e-12	0.0253813	50785	30198	28221
WM056	WM442	MI1081	0.0415346	7.23402	4.68958e-13	0.0336376	44227	32850	30230
WM056	WM561	MI1081	0.0469777	10.8566	2.3e-16	0.0376233	44399	32338	29436
WM056	WM562	MI1081	0.0388081	6.19531	5.8172e-10	0.0311637	44718	32456	30031
WM563	WM056	MI1081	0.0458616	10.954	2.3e-16	0.0333814	39830	25051	22854
MI1081	WM056	WM579	0.0531778	12.7835	2.3e-16	0.0179456	72661	22122	19888
MI1081	WM056	WM580	0.0521436	11.9517	2.3e-16	0.0175956	72461	22014	19832
MI1081	WM056	WM581	0.0497694	12.949	2.3e-16	0.0167781	72617	21968	19885
WM056	XJ160	MI1081	0.0430275	10.396	2.3e-16	0.0350672	43742	33101	30370
WM329	WM330	MI1081	0.00841406	1.54097	0.123325	0.00341212	82740	21393	21036
WM329	WM340	MI1081	0.027596	5.77519	7.68648e-09	0.012576	72494	24502	23186
WM329	WM436	MI1081	0.00642268	1.27442	0.202515	0.00323262	65033	26482	26144
MI1081	WM441	WM329	0.089487	20.8389	2.3e-16	0.0398759	54777	31758	26541
MI1081	WM442	WM329	0.0685837	15.6441	2.3e-16	0.0299702	55492	30546	26625
MI1081	WM561	WM329	0.0648656	13.6733	2.3e-16	0.0282795	55341	30075	26411
MI1081	WM562	WM329	0.0671855	18.7207	2.3e-16	0.0293285	55297	30442	26609
MI1081	WM563	WM329	0.0897666	16.6893	2.3e-16	0.0416336	41898	27054	22597
MI1081	WM329	WM579	0.118508	20.8166	2.3e-16	0.0511773	50721	30278	23862
MI1081	WM329	WM580	0.117898	18.8394	2.3e-16	0.0509306	50534	30162	23800
MI1081	WM329	WM581	0.114581	17.5895	2.3e-16	0.0493061	50632	29980	23816
MI1081	XJ160	WM329	0.0586605	16.4791	2.3e-16	0.0255601	55865	30175	26831
WM330	WM340	MI1081	0.0200603	5.60672	2.06193e-08	0.0092356	72291	24535	23570
WM436	WM330	MI1081	0.000319543	0.0592385	0.952762	0.00016281	65305	26609	26592
MI1081	WM441	WM330	0.0840981	25.7337	2.3e-16	0.037611	54846	31834	26895
MI1081	WM442	WM330	0.0653467	13.795	2.3e-16	0.0285988	55442	30617	26861
MI1081	WM561	WM330	0.0643308	14.5926	2.3e-16	0.0279736	55095	30103	26464
MI1081	WM562	WM330	0.0623268	14.7826	2.3e-16	0.027089	55108	30288	26734
MI1081	WM563	WM330	0.0884053	21.0644	2.3e-16	0.04104	41757	27110	22706
MI1081	WM330	WM579	0.117296	17.5138	2.3e-16	0.0502627	51039	30067	23754
MI1081	WM330	WM580	0.115209	17.5847	2.3e-16	0.0494802	50938	29969	23777
MI1081	WM330	WM581	0.115649	17.3745	2.3e-16	0.0495121	50953	29910	23709
MI1081	XJ160	WM330	0.0549965	14.8517	2.3e-16	0.023972	55778	30194	27046
WM436	WM340	MI1081	0.0186982	4.03059	5.56376e-05	0.00931769	66057	26505	25532
MI1081	WM441	WM340	0.0841736	18.2446	2.3e-16	0.0398537	54139	32149	27157
MI1081	WM442	WM340	0.0666184	12.4985	2.3e-16	0.0308278	54671	30909	27048
MI1081	WM561	WM340	0.0596159	13.4066	2.3e-16	0.0273932	54506	30207	26808
MI1081	WM562	WM340	0.0617588	14.459	2.3e-16	0.0284684	54482	30619	27057
MI1081	WM563	WM340	0.0904754	19.6118	2.3e-16	0.0444202	41179	27432	22880
MI1081	WM340	WM579	0.0707071	16.6538	2.3e-16	0.0293134	52444	27878	24196
MI1081	WM340	WM580	0.0688541	12.6894	2.3e-16	0.028607	52327	27787	24207
MI1081	WM340	WM581	0.0659667	12.7089	2.3e-16	0.0272896	52402	27616	24198
MI1081	XJ160	WM340	0.0568091	12.7394	2.3e-16	0.026175	54986	30490	27212
MI1081	WM441	WM436	0.0818596	26.8456	2.3e-16	0.0408291	54932	31811	26997
MI1081	WM442	WM436	0.0732282	16.4573	2.3e-16	0.0358709	55329	30990	26761
MI1081	WM561	WM436	0.0707977	16.0625	2.3e-16	0.034458	55035	30431	26407
MI1081	WM562	WM436	0.0722398	18.3889	2.3e-16	0.0353162	55092	30873	26713
MI1081	WM563	WM436	0.0937374	22.5767	2.3e-16	0.048326	41553	27175	22517
MI1081	WM436	WM579	0.00811874	2.6497	0.00805627	0.00333827	52833	26014	25595
MI1081	WM436	WM580	0.00980886	3.05642	0.00223995	0.00404638	52644	26046	25540
MI1081	WM436	WM581	0.00736967	1.92296	0.0544853	0.00302827	52715	25903	25524
MI1081	XJ160	WM436	0.0640473	17.3834	2.3e-16	0.0312468	55640	30602	26918
WM441	WM442	MI1081	0.0107017	2.2534	0.0242339	0.00861449	46576	31119	30460
WM441	WM561	MI1081	0.0169889	3.55879	0.000372561	0.0126206	52859	28614	27658
WM441	WM562	MI1081	0.00769331	1.19898	0.230537	0.00617534	46728	30912	30440
WM563	WM441	MI1081	0.0781777	12.7458	2.3e-16	0.0576706	39825	26376	22551
MI1081	WM441	WM579	0.072486	14.9484	2.3e-16	0.0240593	74537	22349	19328
MI1081	WM441	WM580	0.0693775	13.3146	2.3e-16	0.0230212	74380	22196	19316
MI1081	WM441	WM581	0.068904	13.4332	2.3e-16	0.0228273	74477	22168	19310
WM441	XJ160	MI1081	0.0127738	2.49772	0.0124995	0.0104589	45786	31714	30914
WM442	WM561	MI1081	0.00617577	1.28035	0.200421	0.00380947	66163	23298	23012
WM562	WM442	MI1081	0.00349889	0.608512	0.542848	0.00229086	63303	24952	24778
WM563	WM442	MI1081	0.0826238	17.0419	2.3e-16	0.0648152	35615	28165	23866
MI1081	WM442	WM579	0.0756936	16.7926	2.3e-16	0.0249685	75004	22276	19141
MI1081	WM442	WM580	0.0746658	14.987	2.3e-16	0.0246926	74847	22230	19141
MI1081	WM442	WM581	0.0707051	13.3869	2.3e-16	0.0233073	74993	22094	19176
WM442	XJ160	MI1081	0.00355872	0.578956	0.562619	0.00180682	79515	19317	19180
WM562	WM561	MI1081	0.00929134	1.89637	0.0579115	0.0062771	59677	25636	25164
WM563	WM561	MI1081	0.089332	20.5843	2.3e-16	0.0686011	36231	27504	22993
MI1081	WM561	WM579	0.0621654	11.8779	2.3e-16	0.0201833	74537	21426	18918
MI1081	WM561	WM580	0.0628034	11.5871	2.3e-16	0.0204865	74414	21458	18922
MI1081	WM561	WM581	0.0577023	11.3842	2.3e-16	0.0187627	74582	21309	18984
XJ160	WM561	MI1081	0.00340483	0.954361	0.339901	0.00213524	65494	23576	23416
WM563	WM562	MI1081	0.0850561	16.2659	2.3e-16	0.0657472	35784	27791	23434
MI1081	WM562	WM579	0.0653737	14.3046	2.3e-16	0.0213926	74804	21862	19179
MI1081	WM562	WM580	0.0676666	15.5788	2.3e-16	0.0222372	74621	21924	19145
MI1081	WM562	WM581	0.0656681	16.126	2.3e-16	0.0215227	74743	21843	19151
WM562	XJ160	MI1081	0.00632427	1.20613	0.227767	0.0041349	62837	24982	24668
MI1081	WM563	WM579	0.0247853	5.52337	3.32551e-08	0.00852245	57895	17903	17037
MI1081	WM563	WM580	0.0224123	4.5637	5.02606e-06	0.00771328	57804	17814	17033
MI1081	WM563	WM581	0.021736	4.60219	4.18081e-06	0.0074562	57910	17745	16990
WM563	XJ160	MI1081	0.0859473	25.6232	2.3e-16	0.0673905	35441	28233	23764
WM579	WM580	MI1081	0.00624886	0.730322	0.465193	0.000782378	98627	8293	8190
WM579	WM581	MI1081	0.00231905	0.223327	0.823281	0.000288375	98858	8212	8174
MI1081	XJ160	WM579	0.0613699	13.5365	2.3e-16	0.0201679	75375	21895	19363
WM581	WM580	MI1081	0.00373539	0.415293	0.677927	0.000471092	97894	8330	8268
MI1081	XJ160	WM580	0.0624301	12.8243	2.3e-16	0.0205287	75141	21851	19283
MI1081	XJ160	WM581	0.0601804	12.7259	2.3e-16	0.0197128	75244	21739	19271
MI2950	MI3076	MI3071	0.0100462	1.91109	0.0559934	0.00519694	28011	14327	14042
MI2950	MI375	MI3071	0.019915	2.86891	0.00411883	0.00999143	25765	12240	11762
MI2950	MI377	MI3071	0.0281122	4.65765	3.19846e-06	0.0140819	29728	14135	13362
MI605	MI2950	MI3071	0.0153257	1.77973	0.0751204	0.00620977	21423	6360	6168
MI3071	MI711	MI2950	0.103807	12.2441	2.3e-16	0.0220314	41917	8278	6721
MI3071	MI722	MI2950	0.0790826	8.49912	2.3e-16	0.0164942	29208	5458	4658
MI2950	MI894	MI3071	0.0249904	3.64385	0.000268589	0.0126039	27773	13371	12719
MI2950	WM009	MI3071	0.00946892	1.88291	0.0597126	0.00494766	30246	14712	14436
MI2950	WM056	MI3071	0.00834934	1.56386	0.117849	0.00433081	30981	14432	14193
MI2950	WM329	MI3071	0.0692059	7.18763	6.5925e-13	0.0299671	43386	12885	11217
MI2950	WM330	MI3071	0.074942	8.48415	2.3e-16	0.0324507	43717	12981	11171
MI2950	WM340	MI3071	0.0190925	2.32388	0.0201318	0.00799555	44461	11903	11457
WM436	MI2950	MI3071	0.0125272	2.46428	0.0137289	0.0051413	44012	11639	11351
MI2950	WM441	MI3071	0.0165255	2.88642	0.00389647	0.00853781	30530	14640	14164
MI2950	WM442	MI3071	0.020397	2.98801	0.00280798	0.0106885	30173	14908	14312
MI2950	WM561	MI3071	0.0247379	5.02104	5.13925e-07	0.0128734	29883	14664	13956
MI2950	WM562	MI3071	0.0173916	2.58859	0.00963703	0.00906887	30152	14771	14266
MI2950	WM563	MI3071	0.00516831	0.799051	0.424261	0.00268918	23688	11183	11068
MI3071	WM579	MI2950	0.0654113	7.92339	2.22045e-15	0.014626	43877	8600	7544
MI3071	WM580	MI2950	0.0725405	9.81184	2.3e-16	0.0163464	43888	8716	7537
MI3071	WM581	MI2950	0.0649623	7.10067	1.24145e-12	0.0145714	43956	8623	7571
MI2950	XJ160	MI3071	0.0184689	3.1563	0.00159784	0.00964832	30213	14834	14296
MI3076	MI375	MI2950	0.0642615	13.7098	2.3e-16	0.035398	35808	21977	19323
MI3076	MI377	MI2950	0.0748597	10.7637	2.3e-16	0.0410703	40377	24804	21349
MI605	MI2950	MI3076	0.128399	18.7711	2.3e-16	0.0619238	24388	13134	10145
MI2950	MI3076	MI711	0.0179855	3.16381	0.00155719	0.00805376	38036	21876	21103
MI2950	MI3076	MI722	0.0200404	2.64498	0.00816969	0.00925798	28062	15397	14792
MI3076	MI894	MI2950	0.056699	10.4807	2.3e-16	0.0311956	38293	23231	20738
MI3076	WM009	MI2950	0.0446169	10.002	2.3e-16	0.0248424	42920	24771	22655
MI3076	WM056	MI2950	0.0790656	15.2202	2.3e-16	0.0454745	41211	26190	22352
MI2950	WM329	MI3076	0.0685147	11.0349	2.3e-16	0.0385359	48201	24399	21270
MI2950	WM330	MI3076	0.0701693	13.914	2.3e-16	0.0396215	48697	24585	21361
MI2950	WM340	MI3076	0.0869575	17.5758	2.3e-16	0.0484331	48793	24631	20690
MI2950	WM436	MI3076	0.0699361	15.6026	2.3e-16	0.0388943	48250	24195	21032
MI3076	WM441	MI2950	0.0656263	11.5151	2.3e-16	0.0370414	42695	25607	22453
MI3076	WM442	MI2950	0.0494382	8.31624	2.3e-16	0.0275422	43405	24889	22544
MI3076	WM561	MI2950	0.0554763	10.4232	2.3e-16	0.0309114	42725	24781	22176
MI3076	WM562	MI2950	0.0507662	9.27648	2.3e-16	0.0281207	42699	24755	22363
MI3076	WM563	MI2950	0.0665966	11.6398	2.3e-16	0.0386009	32461	21325	18662
MI2950	MI3076	WM579	0.0153461	2.60119	0.00929	0.0063802	39554	22330	21655
MI2950	MI3076	WM580	0.0172296	3.24715	0.00116566	0.00718817	39397	22376	21618
MI2950	MI3076	WM581	0.0176741	2.92268	0.00347032	0.00735482	39538	22341	21565
MI3076	XJ160	MI2950	0.0494544	8.28968	2.3e-16	0.0275181	43135	24860	22517
MI375	MI377	MI2950	0.0147099	1.94168	0.0521763	0.0066752	50113	16728	16243
MI605	MI2950	MI375	0.153342	19.3564	2.3e-16	0.0601383	20660	12132	8906
MI2950	MI375	MI711	0.0505398	10.723	2.3e-16	0.0219957	35354	19560	17678
MI2950	MI375	MI722	0.05141	9.06243	2.3e-16	0.0230245	25760	13590	12261
MI894	MI375	MI2950	0.00528938	0.800023	0.423697	0.00199508	54172	13114	12976
WM009	MI375	MI2950	0.0210091	4.96864	6.74252e-07	0.0101183	50492	18273	17521
MI375	WM056	MI2950	0.0222562	4.68668	2.77669e-06	0.0108004	51688	18074	17287
MI2950	WM329	MI375	0.0961628	14.1829	2.3e-16	0.0440369	40904	23482	19362
MI2950	WM330	MI375	0.105654	16.1669	2.3e-16	0.0484083	41077	23750	19211
MI2950	WM340	MI375	0.116842	16.836	2.3e-16	0.0530032	41297	23753	18783
MI2950	WM436	MI375	0.105579	17.9235	2.3e-16	0.0480241	40732	23561	19061
MI375	WM441	MI2950	0.00533685	1.08759	0.276775	0.00252917	53211	17519	17333
WM442	MI375	MI2950	0.0136642	2.67391	0.00749733	0.00660552	50530	18138	17649
WM561	MI375	MI2950	0.00774795	1.63988	0.101031	0.00371096	50536	17624	17353
WM562	MI375	MI2950	0.0150325	2.25824	0.023931	0.00724275	50361	18096	17560
MI375	WM563	MI2950	0.00609965	1.07582	0.282008	0.00300194	39843	14680	14502
MI2950	MI375	WM579	0.0419718	7.85208	3.9968e-15	0.0169405	36850	19848	18249
MI2950	MI375	WM580	0.0419876	9.29427	2.3e-16	0.016976	36717	19816	18219
MI2950	MI375	WM581	0.0442715	8.20179	2.3e-16	0.0178945	36785	19861	18177
XJ160	MI375	MI2950	0.0150824	2.80096	0.00509515	0.00731641	50568	18239	17697
MI605	MI2950	MI377	0.152641	19.4409	2.3e-16	0.0597735	23609	14087	10356
MI2950	MI377	MI711	0.0588432	10.2469	2.3e-16	0.0255059	40061	22124	19665
MI2950	MI377	MI722	0.0617007	8.42061	2.3e-16	0.0275919	29536	15607	13793
MI894	MI377	MI2950	0.0204163	2.42761	0.0151986	0.00925116	53627	17968	17249
WM009	MI377	MI2950	0.033915	4.94071	7.78397e-07	0.0165061	56641	20974	19598
MI377	WM056	MI2950	0.0102832	2.06527	0.0388979	0.00501034	59448	19993	19586
MI2950	WM329	MI377	0.101375	20.0636	2.3e-16	0.0465055	45458	26748	21824
MI2950	WM330	MI377	0.106317	23.4914	2.3e-16	0.0488237	45769	26951	21771
MI2950	WM340	MI377	0.118561	28.067	2.3e-16	0.0535652	45890	26808	21125
MI2950	WM436	MI377	0.11054	22.9246	2.3e-16	0.050299	45322	26789	21456
WM441	MI377	MI2950	0.00935016	1.76295	0.0779093	0.00437318	61181	19431	19071
WM442	MI377	MI2950	0.0289754	3.86313	0.000111942	0.0140049	56861	20668	19504
WM561	MI377	MI2950	0.021625	2.9589	0.00308742	0.0105023	56786	20338	19477
WM562	MI377	MI2950	0.0268039	4.57667	4.72434e-06	0.0129941	56602	20648	19570
WM563	MI377	MI2950	0.00551125	0.726706	0.467406	0.00268422	46015	16329	16150
MI2950	MI377	WM579	0.0524688	9.17756	2.3e-16	0.0211006	41675	22466	20226
MI2950	MI377	WM580	0.0530934	9.6791	2.3e-16	0.0213834	41507	22443	20180
MI2950	MI377	WM581	0.0562145	9.89264	2.3e-16	0.0226402	41636	22528	20130
XJ160	MI377	MI2950	0.0285771	4.02468	5.70534e-05	0.0139108	56489	20804	19648
MI605	MI2950	MI711	0.026676	5.86124	4.59416e-09	0.00915302	29959	9487	8994
MI605	MI2950	MI722	0.0357027	3.70293	0.000213126	0.012787	20361	6382	5942
MI605	MI2950	MI894	0.150636	19.8731	2.3e-16	0.0592516	22395	13123	9687
MI605	MI2950	WM009	0.141084	22.9206	2.3e-16	0.0475992	24722	14344	10797
MI605	MI2950	WM056	0.146578	23.7272	2.3e-16	0.0531209	23853	14526	10812
WM329	MI2950	MI605	0.11279	19.2362	2.3e-16	0.0990244	18597	15322	12216
WM330	MI2950	MI605	0.110341	19.9401	2.3e-16	0.0974071	18852	15386	12328
WM340	MI2950	MI605	0.105709	13.6484	2.3e-16	0.0919577	18837	15010	12140
WM436	MI2950	MI605	0.12163	18.058	2.3e-16	0.104606	18699	15248	11941
MI605	MI2950	WM441	0.142981	20.4459	2.3e-16	0.049695	24406	14489	10864
MI605	MI2950	WM442	0.137118	20.0498	2.3e-16	0.0446711	24580	14380	10912
MI605	MI2950	WM561	0.137271	17.5139	2.3e-16	0.0457905	24254	14192	10766
MI605	MI2950	WM562	0.133286	16.9467	2.3e-16	0.0454109	24508	14259	10905
MI605	MI2950	WM563	0.144542	20.2885	2.3e-16	0.0567196	18480	11157	8339
MI605	MI2950	WM579	0.0272158	5.87354	4.26583e-09	0.00871685	31170	9851	9329
MI605	MI2950	WM580	0.0285833	5.58976	2.27378e-08	0.00921474	31123	9896	9346
MI605	MI2950	WM581	0.0296316	7.34193	2.10498e-13	0.00947764	31154	9851	9284
MI605	MI2950	XJ160	0.138541	17.3484	2.3e-16	0.0452907	24603	14357	10863
MI722	MI711	MI2950	0.0315122	4.70275	2.56683e-06	0.00464643	51482	5532	5194
MI2950	MI894	MI711	0.0493298	8.24427	2.3e-16	0.0215337	37559	20942	18973
MI2950	WM009	MI711	0.0418814	9.6214	2.3e-16	0.0188998	40435	22949	21104
MI2950	WM056	MI711	0.0366847	8.41002	2.3e-16	0.0163517	41616	22339	20758
MI2950	WM329	MI711	0.12385	15.1417	2.3e-16	0.0465443	60180	20576	16041
MI2950	WM330	MI711	0.120072	14.011	2.3e-16	0.0452119	60708	20583	16170
MI2950	WM340	MI711	0.0560681	8.06638	6.66134e-16	0.0201094	61859	18487	16524
MI2950	WM436	MI711	0.00536652	1.26417	0.20617	0.0018965	61522	17329	17144
MI2950	WM441	MI711	0.0460259	9.86473	2.3e-16	0.0205276	41075	22761	20758
MI2950	WM442	MI711	0.0501694	9.18897	2.3e-16	0.0226199	40451	23099	20892
MI2950	WM561	MI711	0.0466634	9.72956	2.3e-16	0.0209639	40250	22688	20665
MI2950	WM562	MI711	0.0461905	8.75391	2.3e-16	0.0206931	40386	22842	20825
MI2950	WM563	MI711	0.0232505	6.21912	4.99961e-10	0.0104667	33371	17978	17161
WM579	MI711	MI2950	0.0506312	7.12142	1.06826e-12	0.00717634	79069	7657	6919
WM580	MI711	MI2950	0.044561	7.06321	1.62692e-12	0.0062061	79091	7466	6829
WM581	MI711	MI2950	0.0575365	6.29738	3.02727e-10	0.008074	79072	7637	6806
MI2950	XJ160	MI711	0.0450824	10.1218	2.3e-16	0.0202609	40472	22915	20938
MI2950	MI894	MI722	0.0517888	7.85176	3.9968e-15	0.0233683	27702	14714	13265
MI2950	WM009	MI722	0.0312994	5.13498	2.82171e-07	0.0145678	30033	15997	15026
MI2950	WM056	MI722	0.0320901	5.7512	8.8611e-09	0.0147726	30929	15663	14689
MI2950	WM329	MI722	0.112195	10.2061	2.3e-16	0.0435835	44073	14369	11470
MI2950	WM330	MI722	0.10998	9.91736	2.3e-16	0.0427795	44354	14387	11536
MI2950	WM340	MI722	0.0510308	4.75653	1.96948e-06	0.0188291	45164	12924	11669
WM436	MI2950	MI722	0.00135462	0.178987	0.857948	0.000495302	44967	12197	12164
MI2950	WM441	MI722	0.043228	7.31609	2.55351e-13	0.0198442	30445	15952	14630
MI2950	WM442	MI722	0.0471042	7.24244	4.40759e-13	0.0219734	30097	16272	14808
MI2950	WM561	MI722	0.050219	8.48023	2.3e-16	0.023146	29865	15946	14421
MI2950	WM562	MI722	0.0486612	6.50198	7.92721e-11	0.0225852	30057	16195	14692
MI2950	WM563	MI722	0.0234256	3.64162	0.000270924	0.0109019	24271	12473	11902
WM579	MI722	MI2950	0.0168418	2.01306	0.0441087	0.00271816	53798	6098	5896
WM580	MI722	MI2950	0.00649954	0.901894	0.367113	0.00103873	53664	5962	5885
WM581	MI722	MI2950	0.0217739	2.26134	0.0237384	0.00348268	54065	6077	5818
MI2950	XJ160	MI722	0.0398107	6.68292	2.34226e-11	0.0184348	30078	16037	14809
WM009	MI894	MI2950	0.0151366	3.03703	0.00238923	0.00736648	53660	19583	18999
MI894	WM056	MI2950	0.0283589	4.13621	3.53093e-05	0.0137868	55239	19491	18416
MI2950	WM329	MI894	0.0994881	13.2914	2.3e-16	0.0457689	43814	25236	20669
MI2950	WM330	MI894	0.107609	16.4858	2.3e-16	0.0494349	44012	25439	20496
MI2950	WM340	MI894	0.121306	20.0532	2.3e-16	0.0549249	44150	25383	19891
MI2950	WM436	MI894	0.111482	16.0756	2.3e-16	0.0507637	43645	25284	20212
MI894	WM441	MI2950	0.00973582	1.52549	0.127137	0.00461445	56905	18824	18461
WM442	MI894	MI2950	0.0105323	1.67315	0.0942982	0.00512185	53917	19429	19024
WM561	MI894	MI2950	0.00412917	0.666322	0.505205	0.00200015	53939	18968	18812
WM562	MI894	MI2950	0.00940766	1.39794	0.16213	0.00457211	53603	19367	19006
MI894	WM563	MI2950	0.0116513	1.60595	0.108284	0.00573665	42797	15846	15481
MI2950	MI894	WM579	0.0421722	8.16135	2.3e-16	0.0171018	39164	21302	19578
MI2950	MI894	WM580	0.0395198	7.0563	1.70997e-12	0.016049	39067	21214	19601
MI2950	MI894	WM581	0.0422169	7.6145	2.64233e-14	0.0170906	39156	21231	19511
XJ160	MI894	MI2950	0.0098979	1.42956	0.152844	0.00482041	53717	19437	19056
WM009	WM056	MI2950	0.0419536	9.83788	2.3e-16	0.0212013	58179	22017	20244
MI2950	WM329	WM009	0.123457	21.5337	2.3e-16	0.0481174	47091	27946	21804
MI2950	WM330	WM009	0.129909	28.4743	2.3e-16	0.0506923	47381	28198	21714
MI2950	WM340	WM009	0.145334	29.8739	2.3e-16	0.0562313	47592	28343	21150
MI2950	WM436	WM009	0.127279	25.8365	2.3e-16	0.0493648	47163	27943	21633
WM009	WM441	MI2950	0.02592	5.93436	2.95001e-09	0.0122561	61178	20463	19429
WM009	WM442	MI2950	0.00702911	1.16869	0.242527	0.00267912	77707	16189	15963
WM009	WM561	MI2950	0.01374	2.4201	0.0155161	0.00555948	73578	17117	16653
WM009	WM562	MI2950	0.00838941	1.44426	0.148667	0.00335789	75228	17008	16725
WM009	WM563	MI2950	0.0254616	4.52288	6.10044e-06	0.0129845	46066	17882	16994
MI2950	WM009	WM579	0.0649075	14.1467	2.3e-16	0.027262	41471	24052	21120
MI2950	WM009	WM580	0.0634636	13.919	2.3e-16	0.0267588	41407	24038	21169
MI2950	WM009	WM581	0.0676915	14.7256	2.3e-16	0.0284801	41470	24101	21045
WM009	XJ160	MI2950	0.00642385	1.16571	0.243733	0.00251319	76710	16607	16395
MI2950	WM329	WM056	0.125457	22.576	2.3e-16	0.0532001	45455	28496	22143
MI2950	WM330	WM056	0.134096	30.1633	2.3e-16	0.0569373	45639	28810	21997
MI2950	WM340	WM056	0.145522	36.5109	2.3e-16	0.0611592	45897	28803	21485
MI2950	WM436	WM056	0.129783	25.8866	2.3e-16	0.0546291	45443	28431	21899
WM441	WM056	MI2950	0.0191166	4.84006	1.298e-06	0.00916687	63595	20178	19421
WM442	WM056	MI2950	0.0372056	6.88321	5.85199e-12	0.0188272	57878	21884	20314
WM561	WM056	MI2950	0.0313415	6.02029	1.74107e-09	0.0157426	57796	21307	20012
WM562	WM056	MI2950	0.0356819	6.95274	3.58247e-12	0.0179715	58144	21711	20215
WM563	WM056	MI2950	0.0175974	3.63597	0.000276932	0.00879686	48727	17001	16413
MI2950	WM056	WM579	0.0548158	10.8836	2.3e-16	0.0228382	42925	23409	20976
MI2950	WM056	WM580	0.052672	12.3376	2.3e-16	0.0219705	42815	23313	20980
MI2950	WM056	WM581	0.0562442	12.0401	2.3e-16	0.0234326	42906	23390	20899
XJ160	WM056	MI2950	0.0380652	7.73618	1.02141e-14	0.0192642	57544	21912	20305
WM329	WM330	MI2950	0.00770795	1.45006	0.14704	0.00553208	51660	21310	20984
WM329	WM340	MI2950	0.02316	4.38015	1.18597e-05	0.0186982	43195	24342	23240
WM329	WM436	MI2950	0.00407835	0.831551	0.405662	0.00361654	37093	26220	26007
MI2950	WM329	WM441	0.12703	18.4005	2.3e-16	0.0516245	46311	28484	22063
MI2950	WM329	WM442	0.123282	19.8683	2.3e-16	0.046128	46958	28068	21907
MI2950	WM329	WM561	0.111731	15.3803	2.3e-16	0.0428345	46529	27502	21974
MI2950	WM329	WM562	0.114366	16.5455	2.3e-16	0.0449633	47073	27809	22101
MI2950	WM329	WM563	0.127672	22.0048	2.3e-16	0.0585532	37366	22841	17669
MI2950	WM329	WM579	0.153771	21.4836	2.3e-16	0.0544128	61670	21913	16072
MI2950	WM329	WM580	0.152951	21.8335	2.3e-16	0.054175	61503	21849	16052
MI2950	WM329	WM581	0.151387	23.3431	2.3e-16	0.0535481	61735	21809	16074
MI2950	WM329	XJ160	0.111402	18.39	2.3e-16	0.0416739	47120	27565	22039
WM330	WM340	MI2950	0.0162266	4.15422	3.26396e-05	0.0132493	42962	24362	23584
WM436	WM330	MI2950	0.00204382	0.470371	0.63809	0.00182019	37018	26230	26123
MI2950	WM330	WM441	0.128998	27.777	2.3e-16	0.0524918	46708	28628	22086
MI2950	WM330	WM442	0.126442	25.1949	2.3e-16	0.0473366	47314	28223	21887
MI2950	WM330	WM561	0.120241	26.209	2.3e-16	0.0458985	46636	27647	21712
MI2950	WM330	WM562	0.120482	22.1441	2.3e-16	0.0471362	47247	27886	21889
MI2950	WM330	WM563	0.132645	26.9685	2.3e-16	0.0611323	37737	23102	17691
MI2950	WM330	WM579	0.151306	20.8011	2.3e-16	0.0533868	62121	21842	16101
MI2950	WM330	WM580	0.147699	22.1612	2.3e-16	0.0522742	62054	21773	16169
MI2950	WM330	WM581	0.151722	23.9042	2.3e-16	0.0537795	62218	21900	16130
MI2950	WM330	XJ160	0.115573	25.0086	2.3e-16	0.0432279	47439	27722	21978
WM436	WM340	MI2950	0.0172333	3.24846	0.00116033	0.0150371	37415	26090	25206
MI2950	WM340	WM441	0.146873	32.9151	2.3e-16	0.0591917	46829	28802	21425
MI2950	WM340	WM442	0.144314	23.4115	2.3e-16	0.053499	47428	28391	21230
MI2950	WM340	WM561	0.131709	20.8046	2.3e-16	0.0497811	46902	27655	21218
MI2950	WM340	WM562	0.13405	23.7487	2.3e-16	0.0521277	47536	28053	21421
MI2950	WM340	WM563	0.153334	30.7956	2.3e-16	0.0697299	37695	23212	17040
MI2950	WM340	WM579	0.0940001	13.965	2.3e-16	0.0316705	63203	19820	16414
MI2950	WM340	WM580	0.0936499	13.6774	2.3e-16	0.0316385	63080	19806	16414
MI2950	WM340	WM581	0.0896494	13.4395	2.3e-16	0.03015	63290	19660	16425
MI2950	WM340	XJ160	0.132465	24.3041	2.3e-16	0.0491124	47602	27896	21370
MI2950	WM436	WM441	0.123943	27.9307	2.3e-16	0.050114	46553	28302	22060
MI2950	WM436	WM442	0.132012	23.7553	2.3e-16	0.049298	46966	28272	21678
MI2950	WM436	WM561	0.122969	23.0596	2.3e-16	0.0468654	46372	27652	21596
MI2950	WM436	WM562	0.126405	22.6438	2.3e-16	0.0494537	46942	28012	21725
MI2950	WM436	WM563	0.139037	34.148	2.3e-16	0.0633691	37235	22959	17354
MI2950	WM436	WM579	0.0179742	3.59792	0.000320768	0.0059181	63238	18010	17374
MI2950	WM436	WM580	0.0214726	5.3995	6.68274e-08	0.00709418	63042	18077	17317
MI2950	WM436	WM581	0.021911	4.28577	1.82106e-05	0.00723766	63249	18096	17320
MI2950	WM436	XJ160	0.124302	21.1753	2.3e-16	0.0464421	47051	27890	21723
WM442	WM441	MI2950	0.0200476	4.42707	9.55214e-06	0.00952415	61120	20378	19577
WM561	WM441	MI2950	0.0153351	2.6836	0.00728345	0.00677345	66780	18605	18043
WM562	WM441	MI2950	0.0189141	3.46752	0.000525286	0.00902703	61175	20417	19659
WM441	WM563	MI2950	0.00251301	0.429141	0.667821	0.00124334	49690	16755	16671
MI2950	WM441	WM579	0.071894	14.5319	2.3e-16	0.0299699	42167	24019	20797
MI2950	WM441	WM580	0.0707369	16.6411	2.3e-16	0.0295141	42044	23939	20776
MI2950	WM441	WM581	0.0719623	16.4446	2.3e-16	0.0299013	42119	23886	20679
XJ160	WM441	MI2950	0.0204213	4.5336	5.7987e-06	0.00983166	60400	20662	19835
WM442	WM561	MI2950	0.00798895	1.45745	0.144994	0.00292036	79694	15330	15087
WM442	WM562	MI2950	0.00166656	0.245233	0.806276	0.000642696	76981	16228	16174
WM442	WM563	MI2950	0.0196821	3.33503	0.000852905	0.0100644	46246	17770	17084
MI2950	WM442	WM579	0.0746374	13.977	2.3e-16	0.0314515	41536	24340	20959
MI2950	WM442	WM580	0.074528	15.3775	2.3e-16	0.0314932	41413	24330	20955
MI2950	WM442	WM581	0.0745667	14.5531	2.3e-16	0.031366	41526	24239	20875
XJ160	WM442	MI2950	0.00118633	0.290305	0.771583	0.000356672	92578	12659	12629
WM562	WM561	MI2950	0.00655394	1.03933	0.298652	0.00263535	73492	16817	16598
WM561	WM563	MI2950	0.0136873	2.43108	0.0150541	0.00690433	46533	17219	16754
MI2950	WM561	WM579	0.0613605	11.2953	2.3e-16	0.0256427	41448	23576	20850
MI2950	WM561	WM580	0.0628826	12.4043	2.3e-16	0.026364	41340	23613	20819
MI2950	WM561	WM581	0.0602774	11.7272	2.3e-16	0.025192	41520	23509	20836
XJ160	WM561	MI2950	0.00856881	1.82345	0.0682357	0.0031484	79145	15419	15157
WM562	WM563	MI2950	0.0178474	3.96542	7.32671e-05	0.00909799	46356	17651	17032
MI2950	WM562	WM579	0.0622231	10.6424	2.3e-16	0.0260288	41669	23857	21062
MI2950	WM562	WM580	0.0636611	11.3152	2.3e-16	0.0266973	41516	23876	21018
MI2950	WM562	WM581	0.0640214	11.9539	2.3e-16	0.0268068	41667	23866	20994
XJ160	WM562	MI2950	0.00252587	0.424833	0.670959	0.000975784	76690	16273	16191
MI2950	WM563	WM579	0.034931	7.70008	1.35447e-14	0.0146712	34486	18710	17447
MI2950	WM563	WM580	0.0330462	7.70877	1.26565e-14	0.0138921	34405	18647	17454
MI2950	WM563	WM581	0.0350054	9.55541	2.3e-16	0.0146831	34537	18642	17381
XJ160	WM563	MI2950	0.0199215	3.1442	0.00166544	0.0101963	46160	17791	17096
WM579	WM580	MI2950	0.00637119	0.773249	0.439375	0.000879339	84624	7266	7174
WM581	WM579	MI2950	0.00513831	0.563231	0.573278	0.000696591	84771	7140	7067
MI2950	XJ160	WM579	0.0607603	14.656	2.3e-16	0.0255456	41767	23970	21224
WM581	WM580	MI2950	0.0111049	1.4063	0.159634	0.00152835	83952	7284	7124
MI2950	XJ160	WM580	0.0604042	15.906	2.3e-16	0.0253826	41581	23875	21155
MI2950	XJ160	WM581	0.0622039	14.1047	2.3e-16	0.026079	41699	23881	21084
MI3076	MI375	MI3071	0.00652591	1.13667	0.255676	0.0027668	46648	14421	14234
MI3076	MI377	MI3071	0.0190201	4.17012	3.04441e-05	0.00803355	53009	16421	15808
MI605	MI3076	MI3071	0.0171377	2.92188	0.00347928	0.00934413	20327	12434	12015
MI3071	MI711	MI3076	0.114334	13.9593	2.3e-16	0.0250382	58356	11564	9191
MI3071	MI722	MI3076	0.0914826	14.8578	2.3e-16	0.0196677	42100	7958	6624
MI3076	MI894	MI3071	0.0103521	2.33211	0.019695	0.00440991	50065	15567	15248
MI3076	WM009	MI3071	0.00166657	0.321964	0.74748	0.000723496	55696	16829	16773
WM056	MI3076	MI3071	0.00159114	0.317189	0.7511	0.000704088	54132	16996	16942
MI3076	WM329	MI3071	0.0492165	7.35657	1.88738e-13	0.0260208	41990	21425	19415
MI3076	WM330	MI3071	0.05239	7.7271	1.11022e-14	0.027729	42268	21554	19408
MI3076	WM340	MI3071	0.01111	2.58577	0.00971628	0.00571082	43070	20113	19671
WM436	MI3076	MI3071	0.0172678	4.5713	4.84703e-06	0.00880577	42941	20236	19549
MI3076	WM441	MI3071	0.00633736	1.24637	0.212628	0.00276582	55520	16991	16777
MI3076	WM442	MI3071	0.0131755	2.54599	0.010897	0.00572522	55807	17033	16590
MI3076	WM561	MI3071	0.0196399	4.88221	1.04903e-06	0.00848333	55152	16847	16198
MI3076	WM562	MI3071	0.0126945	2.30825	0.0209855	0.0054987	55459	16952	16527
WM563	MI3076	MI3071	0.00986986	1.95376	0.0507294	0.00439253	42130	13813	13543
MI3071	WM579	MI3076	0.0776073	10.1806	2.3e-16	0.0177371	60832	11872	10162
MI3071	WM580	MI3076	0.0868817	10.2281	2.3e-16	0.0199134	60836	11997	10079
MI3071	WM581	MI3076	0.0828704	8.10105	4.44089e-16	0.0190349	61042	11989	10154
MI3076	XJ160	MI3071	0.0102519	2.12022	0.0339874	0.00447173	55759	17048	16702
MI375	MI377	MI3071	0.0150513	2.3225	0.0202061	0.00512631	62436	11667	11321
MI605	MI375	MI3071	0.020504	3.13051	0.001745	0.0110586	18267	10651	10223
MI3071	MI711	MI375	0.152155	17.999	2.3e-16	0.0264245	51099	10586	7790
MI3071	MI722	MI375	0.126822	13.6072	2.3e-16	0.0217284	36499	7228	5601
MI375	MI894	MI3071	0.00205179	0.223706	0.822986	0.000578993	65674	9035	8998
WM009	MI375	MI3071	0.00742525	0.995078	0.319698	0.00269459	62655	12550	12365
WM056	MI375	MI3071	0.00966482	1.73939	0.0819658	0.00345649	63808	12275	12040
MI375	WM329	MI3071	0.0457774	6.51055	7.4875e-11	0.0231108	39991	18036	16457
MI375	WM330	MI3071	0.0486449	5.66567	1.46453e-08	0.0245374	40434	18108	16428
MI375	WM340	MI3071	0.00566211	0.904551	0.365703	0.00278954	41224	16962	16771
WM436	MI375	MI3071	0.025169	4.47265	7.72549e-06	0.0122011	41322	17209	16364
WM441	MI375	MI3071	0.0015683	0.197105	0.843745	0.00055489	65494	12134	12096
MI375	WM442	MI3071	0.00906247	1.45801	0.144839	0.00330178	62476	12582	12356
MI375	WM561	MI3071	0.0140042	2.2507	0.0244044	0.00501301	62616	12273	11934
MI375	WM562	MI3071	0.00577848	0.833742	0.404427	0.0020915	62535	12445	12302
WM563	MI375	MI3071	0.0176159	2.69061	0.00713221	0.00649746	49115	10167	9815
MI3071	WM579	MI375	0.0993256	11.1039	2.3e-16	0.0180498	53513	10758	8814
MI3071	WM580	MI375	0.106721	16.5741	2.3e-16	0.0194832	53475	10868	8772
MI3071	WM581	MI375	0.1106	12.5563	2.3e-16	0.0200938	53656	10865	8701
MI375	XJ160	MI3071	0.00416901	0.750119	0.453183	0.0015196	62398	12525	12421
MI605	MI377	MI3071	0.0286211	4.13397	3.56547e-05	0.0154524	21112	12417	11726
MI3071	MI711	MI377	0.14704	18.6365	2.3e-16	0.0254533	57455	11908	8855
MI3071	MI722	MI377	0.121613	17.1972	2.3e-16	0.0206482	41546	8176	6403
MI894	MI377	MI3071	0.0129186	1.77782	0.075434	0.00435518	66595	12310	11996
WM009	MI377	MI3071	0.0192105	3.44331	0.000574631	0.00708184	70451	14537	13989
WM056	MI377	MI3071	0.0224806	4.58223	4.60035e-06	0.00796652	73419	13895	13284
MI377	WM329	MI3071	0.0363655	6.44187	1.1801e-10	0.0184676	45613	20177	18761
MI377	WM330	MI3071	0.0382438	5.98975	2.1017e-09	0.0194343	45933	20266	18773
WM340	MI377	MI3071	0.00520517	1.0671	0.285925	0.00255764	46838	19022	18825
WM436	MI377	MI3071	0.0344211	9.03406	2.3e-16	0.0167538	46927	19654	18346
WM441	MI377	MI3071	0.0162881	2.30265	0.0212987	0.00564518	74983	13602	13166
WM442	MI377	MI3071	0.0067527	1.37457	0.169264	0.00248071	70386	14238	14047
WM561	MI377	MI3071	0.00112551	0.238894	0.811188	0.000408244	70173	13787	13756
WM562	MI377	MI3071	0.00719272	1.53671	0.124364	0.002639	70322	14213	14010
WM563	MI377	MI3071	0.0349462	5.62147	1.8934e-08	0.0126576	56717	11550	10770
MI3071	WM579	MI377	0.101047	16.4785	2.3e-16	0.0182656	60045	12144	9915
MI3071	WM580	MI377	0.108901	21.2625	2.3e-16	0.0197608	60030	12265	9856
MI3071	WM581	MI377	0.105891	12.3321	2.3e-16	0.0191351	60204	12193	9858
XJ160	MI377	MI3071	0.00987863	1.98329	0.0473351	0.00363259	70019	14312	14032
MI3071	MI711	MI605	0.0696448	9.00781	2.3e-16	0.016987	34113	6489	5644
MI3071	MI722	MI605	0.0471281	4.77032	1.83936e-06	0.0114802	23191	4266	3882
MI605	MI894	MI3071	0.0255914	3.37125	0.000748273	0.0138773	19647	11662	11080
MI605	WM009	MI3071	0.0176239	2.48101	0.0131013	0.00984248	21681	12934	12486
MI605	WM056	MI3071	0.0158973	2.23073	0.0256991	0.00877641	21970	12621	12226
MI605	WM329	MI3071	0.0696008	7.8207	5.32907e-15	0.0333627	29701	11641	10126
MI605	WM330	MI3071	0.0695474	8.39105	2.3e-16	0.0335933	29878	11757	10228
MI605	WM340	MI3071	0.0294367	3.86753	0.000109942	0.0137095	30341	10911	10287
WM436	MI605	MI3071	0.00486316	0.864864	0.387113	0.00223792	30072	10538	10436
MI605	WM441	MI3071	0.0179385	2.57355	0.010066	0.00995692	21920	12853	12400
MI605	WM442	MI3071	0.0219555	3.00763	0.00263296	0.0122198	21917	12940	12384
MI605	WM561	MI3071	0.0284448	4.37576	1.21008e-05	0.0157494	21388	12763	12057
MI605	WM562	MI3071	0.0242446	3.09316	0.00198038	0.0134046	21769	12864	12255
MI605	WM563	MI3071	0.00852479	1.0123	0.311392	0.00479028	16678	9701	9537
MI3071	WM579	MI605	0.0410436	4.30816	1.64616e-05	0.0105718	35688	6823	6285
MI3071	WM580	MI605	0.0491928	4.70093	2.58977e-06	0.0127085	35753	6889	6243
MI3071	WM581	MI605	0.046932	5.15811	2.49457e-07	0.0121434	35877	6893	6275
MI605	XJ160	MI3071	0.0250942	3.58437	0.000337892	0.0139133	21736	12929	12296
MI722	MI711	MI3071	0.0220568	2.56366	0.0103576	0.0166615	17138	7414	7094
MI3071	MI711	MI894	0.153753	19.2761	2.3e-16	0.0269333	54676	11391	8355
MI3071	MI711	WM009	0.146716	24.4635	2.3e-16	0.0224532	59025	12310	9160
MI3071	MI711	WM056	0.146014	18.1119	2.3e-16	0.0230879	58502	12134	9042
MI3071	MI711	WM329	0.174512	24.2853	2.3e-16	0.0314432	57219	13299	9347
MI3071	MI711	WM330	0.165459	21.4879	2.3e-16	0.0297709	57327	13267	9500
MI3071	MI711	WM340	0.14567	27.8085	2.3e-16	0.0258422	58922	12627	9416
MI3071	MI711	WM436	0.122515	16.7117	2.3e-16	0.0222733	60058	12085	9447
MI3071	MI711	WM441	0.143853	17.0381	2.3e-16	0.0225164	58940	12309	9213
MI3071	MI711	WM442	0.140737	20.8842	2.3e-16	0.0208679	58736	12300	9265
MI3071	MI711	WM561	0.139469	18.3058	2.3e-16	0.0210775	57944	12157	9181
MI3071	MI711	WM562	0.141125	19.0719	2.3e-16	0.021691	58688	12234	9208
MI3071	MI711	WM563	0.132682	17.4301	2.3e-16	0.0228741	47025	9685	7416
MI711	WM579	MI3071	0.0246351	2.55144	0.010728	0.0178518	30508	10003	9522
MI711	WM580	MI3071	0.0293965	3.02131	0.00251681	0.0210307	30536	9910	9344
MI711	WM581	MI3071	0.0338663	3.13925	0.00169382	0.0246075	30500	10120	9457
MI3071	MI711	XJ160	0.138383	19.3523	2.3e-16	0.0206834	58891	12286	9299
MI3071	MI722	MI894	0.125757	14.6116	2.3e-16	0.0214248	39237	7712	5989
MI3071	MI722	WM009	0.105406	22.2083	2.3e-16	0.0158224	42909	8332	6743
MI3071	MI722	WM056	0.117208	17.9926	2.3e-16	0.0181644	42278	8307	6564
MI3071	MI722	WM329	0.128007	17.7411	2.3e-16	0.0226852	41633	8909	6887
MI3071	MI722	WM330	0.128082	16.147	2.3e-16	0.0224628	41516	8900	6879
MI3071	MI722	WM340	0.11604	16.827	2.3e-16	0.020219	42634	8579	6795
MI3071	MI722	WM436	0.0928068	14.0542	2.3e-16	0.0165272	43465	8219	6823
MI3071	MI722	WM441	0.11046	17.2108	2.3e-16	0.0168724	42624	8339	6680
MI3071	MI722	WM442	0.10353	16.6507	2.3e-16	0.0151544	42598	8410	6832
MI3071	MI722	WM561	0.109467	17.9214	2.3e-16	0.0162708	41813	8321	6679
MI3071	MI722	WM562	0.104425	17.3381	2.3e-16	0.01587	42467	8387	6801
MI3071	MI722	WM563	0.100434	15.8773	2.3e-16	0.0168409	33421	6459	5280
MI722	WM579	MI3071	0.0390778	6.32782	2.48646e-10	0.0314267	18292	8203	7586
MI722	WM580	MI3071	0.0452204	5.21156	1.87254e-07	0.0362478	18282	8217	7506
MI722	WM581	MI3071	0.046657	4.27799	1.88585e-05	0.0376445	18528	8289	7550
MI3071	MI722	XJ160	0.108654	15.7372	2.3e-16	0.0159609	42656	8423	6772
WM009	MI894	MI3071	0.00837484	1.02431	0.305691	0.00309378	66427	13666	13439
WM056	MI894	MI3071	0.012961	1.64925	0.0990963	0.00463205	68289	13169	12832
MI894	WM329	MI3071	0.0426507	5.596	2.19353e-08	0.0216778	42747	19337	17755
MI894	WM330	MI3071	0.0450475	6.22341	4.86476e-10	0.0229709	43130	19487	17807
MI894	WM340	MI3071	0.00244689	0.419553	0.674812	0.00120319	43988	18026	17938
WM436	MI894	MI3071	0.0265792	4.4411	8.95016e-06	0.0129126	44085	18462	17506
WM441	MI894	MI3071	0.00567896	0.753605	0.451086	0.0020065	69835	13016	12869
MI894	WM442	MI3071	0.00571047	0.882214	0.377661	0.00210613	66394	13561	13407
MI894	WM561	MI3071	0.010197	1.62686	0.103767	0.00365292	66271	13077	12813
MI894	WM562	MI3071	0.00307715	0.40726	0.683817	0.0011227	66262	13365	13283
WM563	MI894	MI3071	0.0246416	3.09827	0.00194653	0.00902261	52622	10936	10410
MI3071	WM579	MI894	0.100695	12.8326	2.3e-16	0.0184273	57192	11554	9440
MI3071	WM580	MI894	0.107625	15.5511	2.3e-16	0.0198169	57242	11686	9415
MI3071	WM581	MI894	0.102754	13.5699	2.3e-16	0.0187696	57346	11553	9400
MI894	XJ160	MI3071	0.00188882	0.303593	0.761438	0.000697569	66438	13526	13475
WM056	WM009	MI3071	0.00366528	0.683707	0.49416	0.00136201	72354	14513	14407
WM009	WM329	MI3071	0.0498827	8.97407	2.3e-16	0.0252423	46649	20805	18828
WM009	WM330	MI3071	0.0529736	8.68909	2.3e-16	0.026796	47066	20901	18798
WM009	WM340	MI3071	0.00987744	1.94881	0.0513179	0.00486705	48263	19528	19146
WM436	WM009	MI3071	0.0195019	5.14154	2.72497e-07	0.00957325	47965	19813	19055
WM009	WM441	MI3071	0.00487665	0.723024	0.469665	0.00173348	75077	14012	13876
WM009	WM442	MI3071	0.0172063	2.88664	0.00389383	0.00505965	91711	11735	11338
WM009	WM561	MI3071	0.0220908	2.86625	0.00415364	0.00674621	87255	12099	11576
WM009	WM562	MI3071	0.0142623	1.42677	0.153646	0.00432602	89135	12054	11715
WM563	WM009	MI3071	0.0120432	1.86504	0.0621764	0.00463926	56681	12185	11895
MI3071	WM579	WM009	0.153194	26.4003	2.3e-16	0.0246728	61155	13260	9737
MI3071	WM580	WM009	0.161159	34.6494	2.3e-16	0.0260901	61142	13405	9684
MI3071	WM581	WM009	0.163611	34.8383	2.3e-16	0.0263139	61227	13360	9603
WM009	XJ160	MI3071	0.0122547	2.18449	0.028926	0.00364512	90555	11812	11526
WM056	WM329	MI3071	0.0537618	9.25807	2.3e-16	0.0270803	48060	20610	18507
WM056	WM330	MI3071	0.0554789	8.73906	2.3e-16	0.0279131	48359	20661	18489
WM056	WM340	MI3071	0.0131234	3.62768	0.000285977	0.00642508	49425	19300	18800
WM436	WM056	MI3071	0.0167633	6.54061	6.12688e-11	0.00818898	49096	19470	18828
WM056	WM441	MI3071	0.00884761	1.49928	0.1338	0.00309824	77999	13740	13499
WM056	WM442	MI3071	0.0165715	2.87752	0.00400818	0.00615634	71884	14692	14213
WM056	WM561	MI3071	0.0216517	4.16271	3.14489e-05	0.0079871	71747	14486	13872
WM056	WM562	MI3071	0.0160704	2.35488	0.0185287	0.00591952	72088	14542	14082
WM563	WM056	MI3071	0.0143456	2.80324	0.00505923	0.00525346	59837	11490	11165
MI3071	WM579	WM056	0.144118	23.2402	2.3e-16	0.0239648	60684	12968	9701
MI3071	WM580	WM056	0.148457	37.2371	2.3e-16	0.0248649	60714	13097	9711
MI3071	WM581	WM056	0.145905	21.8702	2.3e-16	0.0243854	60919	13053	9729
WM056	XJ160	MI3071	0.0129888	2.89333	0.00381178	0.00485936	71471	14740	14362
WM329	WM330	MI3071	0.00435201	0.829883	0.406605	0.00148041	85010	13039	12926
WM340	WM329	MI3071	0.0563042	8.13162	4.44089e-16	0.0204781	77158	14971	13375
WM436	WM329	MI3071	0.0878016	12.0385	2.3e-16	0.0345897	70554	16930	14197
WM441	WM329	MI3071	0.0467638	7.24226	4.41203e-13	0.0234552	47478	20515	18682
WM442	WM329	MI3071	0.0401265	7.92925	2.22045e-15	0.0205224	46752	20724	19125
WM561	WM329	MI3071	0.0369037	6.40814	1.47303e-10	0.0189482	46122	20455	18999
WM562	WM329	MI3071	0.0410615	5.73499	9.75198e-09	0.0210236	46602	20752	19115
WM563	WM329	MI3071	0.0565847	7.34096	2.12053e-13	0.028745	38353	16740	14947
MI3071	WM579	WM329	0.188785	31.3565	2.3e-16	0.035923	59205	14480	9881
MI3071	WM580	WM329	0.192437	30.2329	2.3e-16	0.036609	59195	14506	9824
MI3071	WM581	WM329	0.186881	22.5237	2.3e-16	0.0353854	59397	14385	9855
XJ160	WM329	MI3071	0.0427184	7.72204	1.15463e-14	0.0219952	46497	20943	19227
WM340	WM330	MI3071	0.0600746	8.80703	2.3e-16	0.022062	77313	15202	13479
WM436	WM330	MI3071	0.091358	12.0959	2.3e-16	0.0359868	70927	17017	14168
WM441	WM330	MI3071	0.0494904	7.27747	3.40172e-13	0.0249278	47703	20697	18745
WM442	WM330	MI3071	0.0426405	7.42691	1.11244e-13	0.0218305	47006	20833	19129
WM561	WM330	MI3071	0.0395951	6.54219	6.06253e-11	0.0202226	46343	20440	18883
WM562	WM330	MI3071	0.0435411	5.51593	3.46938e-08	0.022394	46741	20935	19188
WM563	WM330	MI3071	0.0598441	8.23424	2.3e-16	0.0304635	38506	16860	14956
MI3071	WM579	WM330	0.178152	28.329	2.3e-16	0.0337538	59343	14387	10036
MI3071	WM580	WM330	0.182342	28.2539	2.3e-16	0.0346783	59363	14476	10011
MI3071	WM581	WM330	0.183265	29.1144	2.3e-16	0.0346639	59481	14424	9956
XJ160	WM330	MI3071	0.0454489	7.52036	5.4623e-14	0.0233469	46629	20990	19165
WM436	WM340	MI3071	0.0379764	6.41106	1.44514e-10	0.014373	72376	15552	14414
WM441	WM340	MI3071	0.00625633	1.33049	0.183356	0.00307739	48876	19381	19140
WM340	WM442	MI3071	0.000592738	0.131948	0.895025	0.000294566	48217	19413	19390
WM340	WM561	MI3071	0.00343875	0.80119	0.423021	0.0017114	47274	19259	19127
WM562	WM340	MI3071	0.000721352	0.121212	0.903523	0.000358892	48016	19422	19394
WM563	WM340	MI3071	0.0195671	4.75987	1.9372e-06	0.00963077	39544	15684	15082
MI3071	WM579	WM340	0.16822	25.473	2.3e-16	0.0313925	60851	13792	9820
MI3071	WM580	WM340	0.171354	34.4103	2.3e-16	0.0322017	60921	13911	9841
MI3071	WM581	WM340	0.161975	25.3064	2.3e-16	0.0301531	61115	13684	9869
XJ160	WM340	MI3071	0.00263947	0.664509	0.506365	0.00131762	47869	19563	19460
WM436	WM441	MI3071	0.0230237	5.07079	3.96178e-07	0.0113086	48587	19884	18989
WM436	WM442	MI3071	0.0295946	6.95758	3.46168e-12	0.0145546	48230	20039	18887
WM436	WM561	MI3071	0.0333507	8.13092	4.44089e-16	0.0163903	47476	19861	18579
WM436	WM562	MI3071	0.0285405	5.47131	4.46724e-08	0.0140138	48054	19965	18857
WM436	WM563	MI3071	0.00757453	1.72063	0.0853189	0.00371712	39289	15497	15264
MI3071	WM579	WM436	0.10473	18.9067	2.3e-16	0.0199852	62432	12716	10305
MI3071	WM580	WM436	0.119406	22.9985	2.3e-16	0.022828	62328	12895	10144
MI3071	WM581	WM436	0.113073	13.9419	2.3e-16	0.0214463	62486	12733	10146
WM436	XJ160	MI3071	0.0262512	6.90018	5.19362e-12	0.0129649	47876	20055	19029
WM441	WM442	MI3071	0.00946077	1.48221	0.138283	0.00335913	74812	14031	13768
WM441	WM561	MI3071	0.0153499	1.96183	0.0497821	0.00509287	80405	13031	12637
WM441	WM562	MI3071	0.00715338	0.897149	0.36964	0.00254512	74956	14009	13810
WM563	WM441	MI3071	0.0175947	2.41432	0.0157645	0.00641785	60406	11596	11195
MI3071	WM579	WM441	0.154981	23.3523	2.3e-16	0.0255205	60992	13310	9738
MI3071	WM580	WM441	0.159632	29.8717	2.3e-16	0.0264272	61022	13421	9726
MI3071	WM581	WM441	0.157351	22.3561	2.3e-16	0.0258869	61167	13324	9701
WM441	XJ160	MI3071	0.00481723	0.744506	0.456571	0.00173733	74107	14184	14048
WM442	WM561	MI3071	0.00506153	0.67119	0.502099	0.00141399	93481	10822	10713
WM562	WM442	MI3071	0.00260824	0.305311	0.760129	0.000769241	90778	11532	11472
WM563	WM442	MI3071	0.0247906	3.51028	0.000447627	0.00947321	56526	12236	11644
MI3071	WM579	WM442	0.149523	21.9244	2.3e-16	0.0233807	60841	13304	9843
MI3071	WM580	WM442	0.15829	32.6616	2.3e-16	0.0247931	60792	13413	9747
MI3071	WM581	WM442	0.150972	24.4458	2.3e-16	0.0235586	61013	13292	9805
XJ160	WM442	MI3071	0.00689206	1.1148	0.264934	0.00162502	106299	9277	9150
WM562	WM561	MI3071	0.00838557	1.24835	0.211902	0.00256889	87227	11905	11707
WM563	WM561	MI3071	0.030353	5.02751	4.96891e-07	0.0113035	57010	11864	11165
MI3071	WM579	WM561	0.131903	18.0612	2.3e-16	0.0208739	60133	12872	9872
MI3071	WM580	WM561	0.138136	24.5774	2.3e-16	0.0218912	60106	12948	9805
MI3071	WM581	WM561	0.130013	18.5599	2.3e-16	0.0205273	60338	12820	9870
XJ160	WM561	MI3071	0.0113605	1.86791	0.0617748	0.00321189	92626	11039	10791
WM563	WM562	MI3071	0.0280145	3.06031	0.00221104	0.0106378	56865	12183	11519
MI3071	WM579	WM562	0.135655	20.0366	2.3e-16	0.0220584	60970	13110	9978
MI3071	WM580	WM562	0.14476	28.3816	2.3e-16	0.023598	60929	13234	9887
MI3071	WM581	WM562	0.142051	17.6109	2.3e-16	0.0230538	61082	13157	9884
XJ160	WM562	MI3071	0.00294525	0.367856	0.71298	0.000871192	90656	11578	11510
MI3071	WM579	WM563	0.11744	15.0467	2.3e-16	0.0211787	48955	10181	8041
MI3071	WM580	WM563	0.124671	19.2488	2.3e-16	0.0225285	48913	10257	7983
MI3071	WM581	WM563	0.116264	16.5365	2.3e-16	0.0209927	49149	10182	8061
WM563	XJ160	MI3071	0.0240518	4.09934	4.14324e-05	0.00915434	56492	12177	11605
WM579	WM580	MI3071	0.00429618	0.665947	0.505445	0.00314337	34455	9935	9850
WM579	WM581	MI3071	0.010874	1.0434	0.296763	0.00790426	34550	9947	9733
MI3071	WM579	XJ160	0.130985	20.7722	2.3e-16	0.0205646	61154	13051	10028
WM580	WM581	MI3071	0.00610392	0.611308	0.540996	0.00456401	33878	10137	10014
MI3071	WM580	XJ160	0.141212	44.4144	2.3e-16	0.022208	61083	13177	9916
MI3071	WM581	XJ160	0.137122	21.9922	2.3e-16	0.0214237	61241	13057	9908
MI375	MI377	MI3076	0.0086435	1.48138	0.138506	0.00590599	52099	25731	25290
MI3076	MI375	MI605	0.0341704	7.3624	1.80744e-13	0.0196963	30928	15526	14500
MI3076	MI375	MI711	0.0319558	7.65924	1.86517e-14	0.011749	62646	22024	20660
MI3076	MI375	MI722	0.0300029	6.56688	5.13816e-11	0.0114258	47211	15809	14888
MI894	MI375	MI3076	0.00624207	0.932989	0.350826	0.00350104	58324	20231	19980
MI375	WM009	MI3076	0.0337985	6.73492	1.64022e-11	0.0250629	51795	28966	27072
MI375	WM056	MI3076	0.0039299	1.02244	0.306573	0.00281408	54311	26951	26740
MI3076	MI375	WM329	0.0841684	21.2791	2.3e-16	0.0381645	46597	33323	28149
MI3076	MI375	WM330	0.0897685	20.79	2.3e-16	0.0407199	46489	33700	28148
MI3076	MI375	WM340	0.0883178	20.0703	2.3e-16	0.0422217	46028	33943	28434
MI3076	MI375	WM436	0.0971071	27.0559	2.3e-16	0.0490663	46538	34018	27996
MI375	WM441	MI3076	0.02819	5.32835	9.91085e-08	0.0202404	55774	27884	26355
MI375	WM442	MI3076	0.0456738	8.51055	2.3e-16	0.0340971	51633	29488	26912
MI375	WM561	MI3076	0.042065	10.6344	2.3e-16	0.0309696	52179	28724	26405
MI375	WM562	MI3076	0.0346646	7.36019	1.83631e-13	0.0256047	51737	28848	26915
WM563	MI375	MI3076	0.0368523	8.34693	2.3e-16	0.0259596	42841	23282	21627
MI3076	MI375	WM579	0.0236379	5.93194	2.99375e-09	0.00811283	64871	22432	21396
MI3076	MI375	WM580	0.0229245	5.42471	5.80471e-08	0.00789141	64599	22400	21396
MI3076	MI375	WM581	0.024495	5.15359	2.55546e-07	0.00841576	64676	22418	21346
MI375	XJ160	MI3076	0.0393257	6.87884	6.03406e-12	0.0294028	51726	29349	27128
MI3076	MI377	MI605	0.0418712	6.90034	5.18763e-12	0.0239618	35358	17617	16201
MI3076	MI377	MI711	0.0416737	9.51148	2.3e-16	0.0152406	70027	24621	22651
MI3076	MI377	MI722	0.0402802	7.38217	1.55653e-13	0.0152251	53088	17820	16440
MI894	MI377	MI3076	0.0125661	1.81061	0.0702014	0.00856164	55174	27397	26717
MI377	WM009	MI3076	0.0261667	5.68468	1.31055e-08	0.019744	57045	32236	30592
WM056	MI377	MI3076	0.00434967	0.815081	0.415026	0.0031015	61726	29671	29414
MI3076	MI377	WM329	0.0986612	24.9343	2.3e-16	0.0445329	51717	37299	30600
MI3076	MI377	WM330	0.10031	27.743	2.3e-16	0.0453061	51702	37580	30728
MI3076	MI377	WM340	0.0991712	24.8275	2.3e-16	0.047293	51193	37928	31084
MI3076	MI377	WM436	0.105272	21.2037	2.3e-16	0.0531621	51752	37986	30750
MI377	WM441	MI3076	0.0234333	3.73452	0.000188074	0.0166048	63133	30179	28797
MI377	WM442	MI3076	0.0366101	8.20811	2.3e-16	0.0275475	57089	32463	30170
MI377	WM561	MI3076	0.0327035	8.29105	2.3e-16	0.0243991	57403	31783	29770
MI377	WM562	MI3076	0.0271173	7.90905	2.66454e-15	0.02031	57092	31987	30298
WM563	MI377	MI3076	0.043611	8.97466	2.3e-16	0.0301737	48730	25629	23487
MI3076	MI377	WM579	0.0370171	8.37786	2.3e-16	0.0126069	72303	25087	23296
MI3076	MI377	WM580	0.0352152	9.06794	2.3e-16	0.0120194	71980	25002	23301
MI3076	MI377	WM581	0.0375934	8.76257	2.3e-16	0.0128204	72179	25075	23258
MI377	XJ160	MI3076	0.0309704	8.76468	2.3e-16	0.0234553	56767	32490	30538
MI605	MI3076	MI711	0.0383301	7.73707	1.02141e-14	0.0178033	27043	18380	17023
MI605	MI3076	MI722	0.0451459	5.74847	9.00533e-09	0.0217426	19301	12698	11601
MI3076	MI894	MI605	0.0289783	4.93812	7.88792e-07	0.0166601	33204	16547	15615
MI3076	WM009	MI605	0.0255824	4.95069	7.39507e-07	0.0149281	37458	17940	17045
MI3076	WM056	MI605	0.0495726	8.47118	2.3e-16	0.0298007	36013	18727	16958
MI605	WM329	MI3076	0.164858	25.6185	2.3e-16	0.0958542	32545	23084	16550
MI605	WM330	MI3076	0.162618	23.2289	2.3e-16	0.0948422	32752	23164	16684
MI605	WM340	MI3076	0.178456	30.3909	2.3e-16	0.103826	32899	23423	16329
MI605	WM436	MI3076	0.168416	27.133	2.3e-16	0.0975292	32410	23099	16440
MI3076	WM441	MI605	0.0388999	7.3556	1.9007e-13	0.023179	37240	18548	17159
MI3076	WM442	MI605	0.0360977	7.1169	1.10378e-12	0.0210444	37468	18097	16836
MI3076	WM561	MI605	0.0345228	8.57198	2.3e-16	0.0200783	36884	17830	16640
MI3076	WM562	MI605	0.0371109	7.84838	4.21885e-15	0.0217508	37123	18193	16891
MI3076	WM563	MI605	0.0468079	7.32655	2.36255e-13	0.0282846	27910	14995	13654
MI605	MI3076	WM579	0.0365844	7.56226	3.95239e-14	0.0159194	28267	18998	17657
MI605	MI3076	WM580	0.0391996	7.27105	3.56604e-13	0.0170733	28026	19008	17574
MI605	MI3076	WM581	0.037444	7.19707	6.15286e-13	0.0162853	28213	18979	17609
MI3076	XJ160	MI605	0.0329909	5.64328	1.6684e-08	0.0192398	37345	18051	16898
MI722	MI711	MI3076	0.0281016	3.47726	0.000506561	0.00430705	71281	7628	7211
MI3076	MI894	MI711	0.0311617	8.55217	2.3e-16	0.0114606	66388	23362	21950
MI3076	WM009	MI711	0.0277521	8.35447	2.3e-16	0.0103475	73357	25053	23700
MI3076	WM056	MI711	0.0186782	5.09061	3.56919e-07	0.00713619	71619	25224	24299
MI3076	WM329	MI711	0.0839379	13.2571	2.3e-16	0.0389136	54611	32794	27715
MI3076	WM330	MI711	0.0818788	13.6465	2.3e-16	0.0378532	54885	32696	27747
MI3076	WM340	MI711	0.0318259	7.49565	6.59472e-14	0.0141722	56197	30038	28185
WM436	MI3076	MI711	0.0113587	3.49342	0.000476874	0.00501808	56356	29338	28679
MI3076	WM441	MI711	0.0310706	6.86413	6.68976e-12	0.0116743	73163	25320	23794
MI3076	WM442	MI711	0.0367233	9.32079	2.3e-16	0.0137331	73841	25337	23542
MI3076	WM561	MI711	0.0343569	8.57395	2.3e-16	0.0127999	72909	24943	23286
MI3076	WM562	MI711	0.0345295	8.98679	2.3e-16	0.0128725	73178	25182	23501
MI3076	WM563	MI711	0.00428499	1.16056	0.24582	0.00165547	57577	20742	20565
WM579	MI711	MI3076	0.0513349	5.58473	2.34058e-08	0.00736326	105938	9943	8972
WM580	MI711	MI3076	0.0358241	4.03154	5.54134e-05	0.00514194	106034	9773	9097
WM581	MI711	MI3076	0.0471654	4.82242	1.41829e-06	0.00683637	105971	10002	9101
MI3076	XJ160	MI711	0.0310592	7.26251	3.79918e-13	0.0115976	73640	25163	23647
MI3076	MI894	MI722	0.0309253	6.13843	8.33408e-10	0.0118334	50226	16968	15950
MI3076	WM009	MI722	0.0135805	2.51477	0.0119109	0.00525089	55837	17987	17505
MI3076	WM056	MI722	0.0134793	2.90782	0.00363956	0.00533471	54477	18233	17748
MI3076	WM329	MI722	0.0712076	10.003	2.3e-16	0.0341632	41523	23543	20413
MI3076	WM330	MI722	0.072774	10.8149	2.3e-16	0.0348975	41792	23608	20405
MI3076	WM340	MI722	0.0257525	4.50399	6.66892e-06	0.0118752	42721	21708	20618
WM436	MI3076	MI722	0.0173107	4.10115	4.11109e-05	0.00791788	42901	21509	20777
MI3076	WM441	MI722	0.0235406	5.86817	4.40631e-09	0.00913232	55745	18218	17380
MI3076	WM442	MI722	0.0311621	7.83533	4.66294e-15	0.0120748	56262	18332	17224
MI3076	WM561	MI722	0.0325271	5.82214	5.80996e-09	0.012537	55397	18078	16939
MI3076	WM562	MI722	0.0328474	5.73384	9.81847e-09	0.0127089	55702	18316	17151
WM563	MI3076	MI722	0.00170666	0.293877	0.768852	0.000689376	43379	14967	14916
WM579	MI722	MI3076	0.0179391	3.29714	0.000976756	0.00297118	74277	8313	8020
WM580	MI722	MI3076	0.00295457	0.465759	0.641388	0.00048841	74135	8147	8099
WM581	MI722	MI3076	0.016991	1.94092	0.0522674	0.00278924	74551	8230	7955
MI3076	XJ160	MI722	0.0257046	4.77963	1.75615e-06	0.00995041	56099	18216	17303
MI894	WM009	MI3076	0.0379101	8.70587	2.3e-16	0.0283026	54124	31129	28855
MI894	WM056	MI3076	0.00650873	0.964667	0.334711	0.00466622	57335	28763	28391
MI3076	MI894	WM329	0.0810387	19.6159	2.3e-16	0.0367099	49337	35177	29903
MI3076	MI894	WM330	0.0854859	22.2698	2.3e-16	0.0387993	49282	35573	29970
MI3076	MI894	WM340	0.0839471	20.1755	2.3e-16	0.0401478	48754	35838	30287
MI3076	MI894	WM436	0.0904913	22.1664	2.3e-16	0.0457459	49238	35827	29881
MI894	WM441	MI3076	0.0334531	5.65824	1.5293e-08	0.0238807	58803	29626	27708
MI894	WM442	MI3076	0.0479166	10.2487	2.3e-16	0.0358908	54214	31525	28642
MI894	WM561	MI3076	0.0446315	9.19467	2.3e-16	0.0329662	54744	30720	28095
MI894	WM562	MI3076	0.0381102	8.48658	2.3e-16	0.0283835	54193	31026	28748
WM563	MI894	MI3076	0.0336187	4.87646	1.08006e-06	0.0237467	45310	24750	23140
MI3076	MI894	WM579	0.0258407	7.12122	1.06981e-12	0.00885876	68664	23839	22638
MI3076	MI894	WM580	0.0224835	5.65483	1.56003e-08	0.00773013	68418	23739	22695
MI3076	MI894	WM581	0.0234985	6.55042	5.73743e-11	0.00805558	68586	23738	22648
MI894	XJ160	MI3076	0.0431165	7.04773	1.81855e-12	0.0323886	54231	31463	28862
WM056	WM009	MI3076	0.0294848	6.62094	3.56934e-11	0.0227861	59382	33362	31451
MI3076	WM009	WM329	0.0954198	31.1222	2.3e-16	0.043712	54537	38171	31521
MI3076	WM009	WM330	0.0985771	34.461	2.3e-16	0.0452941	54526	38604	31676
MI3076	WM009	WM340	0.102186	27.4094	2.3e-16	0.0494705	53807	39051	31810
MI3076	WM009	WM436	0.0991341	25.3882	2.3e-16	0.0507271	54670	38717	31733
WM441	WM009	MI3076	0.00392853	1.0964	0.272906	0.00299459	62359	31688	31440
WM009	WM442	MI3076	0.0133502	4.04038	5.33657e-05	0.00818679	82711	25656	24980
WM009	WM561	MI3076	0.00845231	1.95118	0.0510356	0.00542535	77751	26487	26043
WM009	WM562	MI3076	0.00101348	0.240793	0.809716	0.000642385	79759	26174	26121
WM563	WM009	MI3076	0.068045	15.9842	2.3e-16	0.051302	48184	28928	25242
MI3076	WM009	WM579	0.0574959	12.5389	2.3e-16	0.0201322	75020	26614	23720
MI3076	WM009	WM580	0.0537861	12.613	2.3e-16	0.0188696	74738	26469	23767
MI3076	WM009	WM581	0.0576854	14.6528	2.3e-16	0.0202515	74936	26623	23719
WM009	XJ160	MI3076	0.00672932	1.46756	0.142223	0.00421471	81414	26031	25683
MI3076	WM056	WM329	0.128371	33.3465	2.3e-16	0.0614524	52357	40750	31478
MI3076	WM056	WM330	0.131203	32.0357	2.3e-16	0.0629481	52335	41143	31599
MI3076	WM056	WM340	0.131055	31.5486	2.3e-16	0.0662495	51745	41482	31869
MI3076	WM056	WM436	0.130119	38.3243	2.3e-16	0.0691941	52380	41025	31578
WM056	WM441	MI3076	0.0277686	6.44846	1.12991e-10	0.0200635	66897	31127	29445
WM056	WM442	MI3076	0.0398219	8.3317	2.3e-16	0.0309246	58911	33854	31261
WM056	WM561	MI3076	0.0361812	9.9445	2.3e-16	0.0278189	59324	33092	30781
WM056	WM562	MI3076	0.0302917	7.36419	1.78302e-13	0.0233019	59670	33196	31244
WM563	WM056	MI3076	0.0409776	10.6781	2.3e-16	0.029028	52975	26280	24211
MI3076	WM056	WM579	0.0420669	8.33528	2.3e-16	0.0150586	73373	26580	24434
MI3076	WM056	WM580	0.0381805	7.47857	7.50511e-14	0.0136964	73097	26430	24486
MI3076	WM056	WM581	0.0402985	7.78191	7.10543e-15	0.0144326	73279	26486	24434
WM056	XJ160	MI3076	0.0340911	9.15308	2.3e-16	0.0265673	58477	33776	31549
WM329	WM330	MI3076	0.00419837	0.628035	0.529981	0.00186834	96652	23560	23363
WM329	WM340	MI3076	0.020222	5.84297	5.12768e-09	0.01009	84821	26840	25776
WM329	WM436	MI3076	0.00182482	0.474954	0.63482	0.0010058	76154	29097	28991
MI3076	WM441	WM329	0.117976	24.5863	2.3e-16	0.0549901	54015	39625	31262
MI3076	WM442	WM329	0.100317	28.2072	2.3e-16	0.0458314	54922	38225	31255
MI3076	WM561	WM329	0.0954073	29.4496	2.3e-16	0.0436516	54430	37768	31189
MI3076	WM562	WM329	0.097039	25.6797	2.3e-16	0.0445013	54490	38217	31456
MI3076	WM563	WM329	0.116667	29.3334	2.3e-16	0.0565115	42229	34012	26905
MI3076	WM329	WM579	0.110798	21.2294	2.3e-16	0.0481553	55918	34638	27728
MI3076	WM329	WM580	0.108125	18.8895	2.3e-16	0.0470703	55619	34476	27748
MI3076	WM329	WM581	0.107445	20.0568	2.3e-16	0.0466323	55822	34400	27725
MI3076	XJ160	WM329	0.0896621	22.4148	2.3e-16	0.0409176	54936	37814	31591
WM330	WM340	MI3076	0.0161906	3.4663	0.000527681	0.0081647	84766	27020	26159
WM436	WM330	MI3076	0.00146868	0.312982	0.754295	0.00081539	76448	29321	29235
MI3076	WM441	WM330	0.116753	28.5991	2.3e-16	0.0543761	54060	39762	31448
MI3076	WM442	WM330	0.100167	25.9673	2.3e-16	0.0457726	54955	38436	31437
MI3076	WM561	WM330	0.0986402	38.3198	2.3e-16	0.045184	54373	38136	31288
MI3076	WM562	WM330	0.0963277	25.7423	2.3e-16	0.0440953	54470	38332	31596
MI3076	WM563	WM330	0.117946	28.9911	2.3e-16	0.0568855	42104	34056	26870
MI3076	WM330	WM579	0.108542	20.5196	2.3e-16	0.0470234	56199	34515	27756
MI3076	WM330	WM580	0.104868	19.6765	2.3e-16	0.0456492	56024	34431	27895
MI3076	WM330	WM581	0.107342	21.6675	2.3e-16	0.0466088	56143	34471	27788
MI3076	XJ160	WM330	0.0891907	23.8474	2.3e-16	0.0407974	55034	38089	31851
WM436	WM340	MI3076	0.0163917	4.74701	2.06449e-06	0.00894034	77474	29236	28293
MI3076	WM441	WM340	0.120323	28.9064	2.3e-16	0.0593107	53471	40405	31726
MI3076	WM442	WM340	0.105247	20.6693	2.3e-16	0.0506442	54166	38908	31498
MI3076	WM561	WM340	0.0978118	26.7649	2.3e-16	0.0471018	53723	38329	31499
MI3076	WM562	WM340	0.0993377	26.1138	2.3e-16	0.0480236	53850	38844	31824
MI3076	WM563	WM340	0.125224	22.4471	2.3e-16	0.0635416	41378	34550	26860
MI3076	WM340	WM579	0.0637186	12.5849	2.3e-16	0.0266235	57414	31944	28117
MI3076	WM340	WM580	0.0602205	11.6886	2.3e-16	0.0252544	57206	31831	28215
MI3076	WM340	WM581	0.0588864	12.1414	2.3e-16	0.0245973	57397	31711	28184
MI3076	XJ160	WM340	0.0946613	20.3989	2.3e-16	0.0456149	54249	38589	31915
MI3076	WM441	WM436	0.114424	31.4554	2.3e-16	0.0594372	54345	39839	31658
MI3076	WM442	WM436	0.107652	28.2771	2.3e-16	0.0549743	54949	38924	31358
MI3076	WM561	WM436	0.103423	34.5908	2.3e-16	0.0527566	54354	38387	31191
MI3076	WM562	WM436	0.105707	27.9424	2.3e-16	0.0540918	54420	38901	31463
MI3076	WM563	WM436	0.124396	30.0035	2.3e-16	0.0667305	42006	34316	26723
MI3076	WM436	WM579	0.00109216	0.28828	0.773132	0.000452476	58052	29790	29725
MI3076	WM436	WM580	0.00163033	0.472301	0.636712	0.00067789	57714	29797	29700
MI3076	WM436	WM581	0.00163039	0.453331	0.65031	0.000676935	57932	29796	29699
MI3076	XJ160	WM436	0.0984946	28.0789	2.3e-16	0.0502921	54923	38600	31678
WM441	WM442	MI3076	0.0147841	3.27802	0.00104537	0.0113168	62092	32158	31221
WM441	WM561	MI3076	0.0118144	2.36342	0.0181069	0.00831211	69725	29204	28522
WM441	WM562	MI3076	0.00458475	1.07212	0.283667	0.00349426	62456	31662	31373
WM563	WM441	MI3076	0.0673056	12.9486	2.3e-16	0.0481003	53298	27394	23939
MI3076	WM441	WM579	0.0628105	11.791	2.3e-16	0.0221695	74805	26955	23769
MI3076	WM441	WM580	0.0577836	11.3559	2.3e-16	0.0204124	74533	26745	23823
MI3076	WM441	WM581	0.0602119	12.8578	2.3e-16	0.0212493	74714	26817	23771
WM441	XJ160	MI3076	0.00899076	1.83875	0.0659516	0.00697129	61299	32377	31800
WM561	WM442	MI3076	0.00504723	1.02428	0.305705	0.00296182	85624	23995	23754
WM562	WM442	MI3076	0.0123928	2.91468	0.00356055	0.00764359	81853	25733	25103
WM563	WM442	MI3076	0.0766905	15.1574	2.3e-16	0.0578982	47997	29195	25036
MI3076	WM442	WM579	0.0672869	21.8194	2.3e-16	0.0236538	75519	26957	23558
MI3076	WM442	WM580	0.0648115	21.9238	2.3e-16	0.0228449	75223	26862	23592
MI3076	WM442	WM581	0.0638754	22.1485	2.3e-16	0.0224571	75459	26807	23588
XJ160	WM442	MI3076	0.0087093	1.76539	0.0774988	0.00418517	101263	19921	19577
WM562	WM561	MI3076	0.00739071	1.9909	0.0464924	0.00473783	77964	26375	25988
WM563	WM561	MI3076	0.0739431	20.4734	2.3e-16	0.0548393	49032	28387	24478
MI3076	WM561	WM579	0.0526951	11.3458	2.3e-16	0.0183952	74799	26150	23532
MI3076	WM561	WM580	0.0505805	9.41455	2.3e-16	0.0176727	74468	26015	23510
MI3076	WM561	WM581	0.0480021	10.4051	2.3e-16	0.0167272	74743	25926	23551
XJ160	WM561	MI3076	0.00173439	0.373172	0.70902	0.00103147	84919	24258	24174
WM563	WM562	MI3076	0.0705687	19.9958	2.3e-16	0.0526851	48505	28680	24899
MI3076	WM562	WM579	0.0558041	11.4066	2.3e-16	0.019554	75035	26554	23747
MI3076	WM562	WM580	0.0553246	11.689	2.3e-16	0.0194459	74716	26524	23743
MI3076	WM562	WM581	0.0555633	11.4468	2.3e-16	0.0195019	74944	26530	23737
WM562	XJ160	MI3076	0.00568538	1.45522	0.145608	0.00351903	81648	25649	25359
MI3076	WM563	WM579	0.0187795	3.95576	7.62916e-05	0.00680694	59222	21727	20926
MI3076	WM563	WM580	0.0146913	2.91544	0.00355192	0.00532105	58962	21549	20925
MI3076	WM563	WM581	0.0161442	3.36706	0.00075974	0.00586425	59233	21652	20964
WM563	XJ160	MI3076	0.0733767	17.0045	2.3e-16	0.0554086	48046	29103	25124
WM579	WM580	MI3076	0.0156275	2.07401	0.0380784	0.00217531	112928	9456	9165
WM579	WM581	MI3076	0.00449889	0.427128	0.669286	0.000619935	113288	9266	9183
MI3076	XJ160	WM579	0.0513959	12.4478	2.3e-16	0.018039	75545	26512	23920
WM581	WM580	MI3076	0.0109913	1.19861	0.230681	0.00155587	112220	9566	9358
MI3076	XJ160	WM580	0.0495219	11.3011	2.3e-16	0.0174034	75202	26396	23905
MI3076	XJ160	WM581	0.0502338	11.7288	2.3e-16	0.0176152	75403	26395	23870
MI375	MI377	MI605	0.00848194	1.55053	0.121013	0.00401135	42615	12187	11982
MI375	MI377	MI711	0.0117159	1.73322	0.0830564	0.00348139	84546	17314	16913
MI375	MI377	MI722	0.0105263	1.49093	0.13598	0.00324331	63349	12480	12220
MI894	MI375	MI377	0.00587748	1.17927	0.238289	0.00382576	38016	25500	25202
MI377	MI375	WM009	0.00533928	1.34506	0.178606	0.00329628	36025	33610	33253
MI375	MI377	WM056	0.0265279	4.59844	4.25673e-06	0.018761	32876	35349	33522
MI375	MI377	WM329	0.0162489	3.52871	0.000417584	0.00616007	64982	25236	24429
MI375	MI377	WM330	0.0110509	2.68713	0.00720693	0.00417862	64710	25114	24565
MI375	MI377	WM340	0.0134235	2.74474	0.00605585	0.00537793	64224	25480	24805
MI375	MI377	WM436	0.0121493	2.23685	0.0252962	0.00516282	64419	25201	24596
MI375	MI377	WM441	0.0291093	6.25454	3.98686e-10	0.0206794	32189	36520	34454
MI375	MI377	WM442	0.000964721	0.184551	0.853581	0.000564427	36108	33721	33656
MI377	MI375	WM561	0.00361875	0.824204	0.409823	0.00220288	34766	33558	33316
MI377	MI375	WM562	0.00408628	0.808585	0.418754	0.00253536	35855	33541	33268
MI375	MI377	WM563	0.0273753	5.87522	4.22293e-09	0.0202509	28884	27509	26043
MI375	MI377	WM579	0.01604	2.80487	0.00503365	0.00441319	87118	17768	17207
MI375	MI377	WM580	0.0133501	2.0211	0.0432691	0.00368634	86885	17724	17257
MI375	MI377	WM581	0.0152479	2.27073	0.0231634	0.00419601	86876	17711	17179
MI377	MI375	XJ160	0.00632534	1.21107	0.225867	0.00370416	36339	33728	33304
MI605	MI375	MI711	0.0636576	12.6239	2.3e-16	0.029377	24372	16425	14459
MI605	MI375	MI722	0.0650228	9.69454	2.3e-16	0.0312086	17208	11187	9821
MI894	MI375	MI605	0.0108296	1.75996	0.0784143	0.00424261	45503	9614	9408
WM009	MI375	MI605	0.00921359	1.5891	0.112038	0.0046251	42854	13199	12958
MI375	WM056	MI605	0.0186561	3.52529	0.000423018	0.00938912	43799	13159	12677
MI605	WM329	MI375	0.209391	29.7779	2.3e-16	0.0994966	27651	22202	14514
MI605	WM330	MI375	0.214352	27.2854	2.3e-16	0.101968	27684	22372	14474
MI605	WM340	MI375	0.226713	33.1845	2.3e-16	0.107902	27800	22612	14254
MI605	WM436	MI375	0.220998	34.4211	2.3e-16	0.105195	27319	22492	14350
MI375	WM441	MI605	0.00633625	1.20961	0.22643	0.00314399	45119	12944	12781
MI375	WM442	MI605	0.000990325	0.145123	0.884613	0.000501572	42745	13140	13114
MI375	WM561	MI605	0.0019782	0.438988	0.66067	0.000994714	42845	12916	12865
MI375	WM562	MI605	0.00168647	0.368953	0.712163	0.000849536	42624	13067	13023
MI375	WM563	MI605	0.0114474	1.43022	0.152655	0.00579952	33281	10426	10190
MI605	MI375	WM579	0.0528789	11.537	2.3e-16	0.0228071	25551	16805	15117
MI605	MI375	WM580	0.053978	12.6585	2.3e-16	0.0233682	25459	16851	15125
MI605	MI375	WM581	0.0561087	11.3981	2.3e-16	0.0242457	25464	16865	15073
XJ160	MI375	MI605	0.00106944	0.171505	0.863827	0.000539832	42837	13105	13077
MI722	MI711	MI375	0.0410511	4.77318	1.81341e-06	0.00506053	62589	7012	6459
MI894	MI375	MI711	0.00254322	0.356326	0.721596	0.000628341	90430	13600	13531
WM009	MI375	MI711	0.0043931	0.850051	0.395297	0.00138846	84614	18519	18357
WM056	MI375	MI711	0.0150145	3.80976	0.0001391	0.00468091	86896	18354	17811
MI375	WM329	MI711	0.0612706	7.92569	2.22045e-15	0.0275088	52438	27705	24506
MI375	WM330	MI711	0.0577505	7.63415	2.26485e-14	0.0257066	52975	27428	24433
MI375	WM340	MI711	0.00528847	0.937292	0.348609	0.00227442	54175	25187	24922
WM436	MI375	MI711	0.0421146	10.2908	2.3e-16	0.017717	54706	25982	23882
WM441	MI375	MI711	0.00191078	0.385808	0.699639	0.000592066	88820	18090	18021
MI375	WM442	MI711	0.00823768	1.30703	0.191203	0.00261875	84380	18665	18360
MI375	WM561	MI711	0.00322964	0.633888	0.526154	0.00101468	84702	18172	18055
MI375	WM562	MI711	0.0027999	0.461366	0.644536	0.000885146	84417	18445	18342
WM563	MI375	MI711	0.0319781	7.02144	2.1958e-12	0.0102255	69036	15813	14833
WM579	MI711	MI375	0.0724334	7.29394	3.01092e-13	0.00828777	94130	9224	7978
WM580	MI711	MI375	0.0617123	6.51768	7.14049e-11	0.00695329	94192	8972	7929
WM581	MI711	MI375	0.0631844	7.34176	2.1072e-13	0.00718548	94123	9078	7999
XJ160	MI375	MI711	0.000486513	0.0692504	0.94479	0.000154524	84376	18508	18490
MI894	MI375	MI722	0.00286738	0.352718	0.7243	0.00073658	67434	9793	9737
WM009	MI375	MI722	0.0196108	2.83192	0.0046269	0.00639064	63897	13570	13048
WM056	MI375	MI722	0.020405	3.20077	0.0013706	0.00656528	65230	13277	12746
MI375	WM329	MI722	0.0481915	5.65661	1.54395e-08	0.0222735	39613	19619	17815
MI375	WM330	MI722	0.0492584	6.05873	1.37197e-09	0.0226727	40087	19597	17757
WM340	MI375	MI722	0.00163376	0.238061	0.811834	0.000726431	40879	18086	18027
WM436	MI375	MI722	0.0474024	10.4533	2.3e-16	0.0206393	41317	18881	17172
WM441	MI375	MI722	0.00974478	1.92252	0.05454	0.00309651	66653	13056	12804
MI375	WM442	MI722	0.00479401	0.773071	0.439481	0.00157768	63637	13414	13286
MI375	WM561	MI722	0.00411776	1.10226	0.270348	0.00133257	63699	13046	12939
MI375	WM562	MI722	0.00236371	0.324159	0.745817	0.00077725	63693	13358	13295
WM563	MI375	MI722	0.0358965	4.72763	2.27156e-06	0.011951	51423	11370	10582
WM579	MI722	MI375	0.0196741	2.53898	0.0111176	0.00261322	65447	7541	7250
WM580	MI722	MI375	0.0110756	1.67782	0.0933828	0.00146675	65320	7440	7277
WM581	MI722	MI375	0.0095943	1.09062	0.275441	0.00125903	65636	7366	7226
XJ160	MI375	MI722	0.0040798	0.540332	0.588968	0.00134189	63644	13413	13304
MI894	MI375	WM009	0.0205348	3.66612	0.00024626	0.0103531	41881	26812	25733
MI894	MI375	WM056	0.0100846	1.67052	0.094816	0.00582414	39260	27294	26749
MI894	MI375	WM329	0.00513791	0.966717	0.333685	0.00160432	71013	19661	19460
MI894	MI375	WM330	0.00619226	1.16214	0.24518	0.00194173	70799	19824	19580
MI894	MI375	WM340	0.00858747	1.87528	0.0607537	0.00283701	70268	20025	19684
MI894	MI375	WM436	0.0058654	1.33808	0.180869	0.00206934	70554	19893	19661
MI894	MI375	WM441	0.00473764	0.898136	0.369113	0.00275897	38588	27994	27730
MI894	MI375	WM442	0.0134693	2.25171	0.0243404	0.00643752	41892	26824	26111
MI894	MI375	WM561	0.0108782	1.63976	0.101055	0.0054692	40537	26763	26187
MI894	MI375	WM562	0.0180137	2.76802	0.00563984	0.00909828	41554	26646	25703
MI894	MI375	WM563	0.00790326	1.593	0.11116	0.00478572	34278	21170	20838
MI375	MI894	WM579	0.00147307	0.231736	0.816743	0.000338267	93134	13937	13896
MI894	MI375	WM580	0.002331	0.32355	0.746279	0.000537861	92927	13975	13910
MI894	MI375	WM581	0.00327397	0.464442	0.642331	0.000751811	92981	13943	13852
MI894	MI375	XJ160	0.0150851	2.28043	0.022582	0.00726981	42063	26849	26051
MI375	WM056	WM009	0.00832472	1.75866	0.0786357	0.00535525	37645	35126	34546
MI375	WM009	WM329	0.0133308	3.30386	0.000953633	0.00535845	64869	26985	26275
MI375	WM009	WM330	0.0103012	3.13401	0.00172437	0.00413861	64582	26971	26421
MI375	WM009	WM340	0.0177613	4.38751	1.14653e-05	0.00758566	64071	27591	26628
MI375	WM009	WM436	0.00652914	2.17959	0.0292881	0.00296108	64579	27055	26704
MI375	WM441	WM009	0.0659665	15.2149	2.3e-16	0.0428068	37820	37756	33083
WM442	WM009	MI375	0.0004199	0.111831	0.910957	0.000272618	56576	27399	27376
WM009	WM561	MI375	0.0206997	5.1456	2.66667e-07	0.0142527	52087	29364	28173
WM009	WM562	MI375	0.00207827	0.532705	0.594237	0.00139998	53762	28448	28330
WM563	MI375	WM009	0.0313317	7.98568	1.33227e-15	0.0199241	29216	30168	28335
MI375	WM009	WM579	0.040288	8.30401	2.3e-16	0.011919	86579	19792	18259
MI375	WM009	WM580	0.0359531	7.085	1.39044e-12	0.0106948	86437	19752	18381
MI375	WM009	WM581	0.0393337	7.79532	6.43929e-15	0.0116694	86414	19778	18281
XJ160	WM009	MI375	0.00323382	0.648144	0.516892	0.00214123	55396	28076	27895
MI375	WM056	WM329	0.0607911	16.3184	2.3e-16	0.0246225	66300	28225	24990
MI375	WM056	WM330	0.0577071	14.1083	2.3e-16	0.0233614	66054	28199	25122
MI375	WM056	WM340	0.0598491	13.3103	2.3e-16	0.0255267	65464	28449	25236
MI375	WM056	WM436	0.0488493	15.2677	2.3e-16	0.022233	66050	28052	25439
WM056	WM441	MI375	0.0231259	4.66776	3.04498e-06	0.0197302	39596	35172	33582
MI375	WM056	WM442	0.00509245	0.991417	0.321482	0.00307006	37810	35033	34678
MI375	WM056	WM561	0.00251491	0.441096	0.659143	0.00159068	36593	34880	34705
MI375	WM056	WM562	0.0127389	2.85611	0.00428862	0.00823026	37348	35258	34371
WM563	WM056	MI375	0.0614964	15.2568	2.3e-16	0.049345	30774	29715	26272
MI375	WM056	WM579	0.0250796	5.09318	3.52115e-07	0.00735058	89024	19149	18212
MI375	WM056	WM580	0.0205702	3.73182	0.000190098	0.00603851	88822	19027	18260
MI375	WM056	WM581	0.0209531	3.95307	7.71555e-05	0.0061341	88837	19003	18223
WM056	MI375	XJ160	0.00236304	0.494188	0.621174	0.00143068	38107	34783	34619
WM329	WM330	MI375	0.0111668	1.95654	0.0504014	0.00404723	83228	22502	22005
WM329	WM340	MI375	0.0241308	4.55869	5.14731e-06	0.0099018	72914	25804	24588
WM329	WM436	MI375	0.0137391	3.41831	0.000630124	0.00621715	64817	28149	27386
MI375	WM441	WM329	0.042891	8.36338	2.3e-16	0.0168275	68181	27099	24870
MI375	WM442	WM329	0.0203538	3.92711	8.59733e-05	0.0081992	64678	27221	26135
MI375	WM561	WM329	0.0130283	2.68878	0.00717142	0.00518233	65207	26437	25757
MI375	WM562	WM329	0.0145135	3.15573	0.00160095	0.00583416	64857	26982	26210
MI375	WM563	WM329	0.0426679	9.91341	2.3e-16	0.0176417	52406	23496	21573
MI375	WM329	WM579	0.0958777	14.7209	2.3e-16	0.0402589	53944	29535	24367
MI375	WM329	WM580	0.0938209	13.8449	2.3e-16	0.0394216	53717	29403	24359
MI375	WM329	WM581	0.0918897	13.7254	2.3e-16	0.0384537	53719	29255	24331
MI375	XJ160	WM329	0.00768612	1.63946	0.101117	0.00310278	64932	26942	26531
WM330	WM340	MI375	0.0142156	3.11654	0.00182989	0.00588379	72528	25720	24999
WM330	WM436	MI375	0.00453847	1.23448	0.217024	0.0020743	64937	28110	27856
MI375	WM441	WM330	0.0348169	6.69643	2.13574e-11	0.0136852	68094	27017	25199
MI375	WM442	WM330	0.0144625	2.85498	0.00430389	0.00584817	64596	27251	26474
MI375	WM561	WM330	0.0101388	2.11414	0.0345037	0.00403342	64960	26452	25921
MI375	WM562	WM330	0.00778342	1.5595	0.118877	0.00311911	64614	26802	26388
MI375	WM563	WM330	0.0402212	9.76925	2.3e-16	0.016627	52307	23509	21691
MI375	WM330	WM579	0.0928401	12.9572	2.3e-16	0.0386748	54457	29275	24301
MI375	WM330	WM580	0.0897881	14.3101	2.3e-16	0.0374924	54293	29166	24360
MI375	WM330	WM581	0.0910453	13.8411	2.3e-16	0.0379093	54236	29138	24275
MI375	XJ160	WM330	0.000486436	0.101905	0.918832	0.000195714	64678	26738	26712
WM436	WM340	MI375	0.00847904	1.90267	0.0570834	0.0038216	65891	27772	27305
MI375	WM441	WM340	0.0420203	7.50794	6.01741e-14	0.0175945	67619	27687	25454
MI375	WM442	WM340	0.0221175	4.72659	2.28316e-06	0.00947128	63981	27774	26572
MI375	WM561	WM340	0.0113212	3.44725	0.000566327	0.00477205	64516	26799	26199
MI375	WM562	WM340	0.0134887	2.51543	0.0118886	0.00573394	64094	27312	26585
MI375	WM563	WM340	0.0494997	9.97063	2.3e-16	0.0216304	51708	23969	21708
MI375	WM340	WM579	0.0467459	8.05729	8.88178e-16	0.0188694	55616	27173	24746
MI375	WM340	WM580	0.0430105	7.04567	1.84586e-12	0.0174036	55466	27051	24820
MI375	WM340	WM581	0.0402892	6.10109	1.05347e-09	0.016245	55498	26905	24821
MI375	XJ160	WM340	0.00968835	2.2802	0.022596	0.0041449	64137	27409	26883
MI375	WM441	WM436	0.0244359	6.20793	5.36869e-10	0.0108007	68157	26831	25551
MI375	WM442	WM436	0.0155993	3.70221	0.000213731	0.00711392	64431	27442	26599
MI375	WM561	WM436	0.0118262	3.307	0.000943016	0.00531462	64838	26694	26070
MI375	WM562	WM436	0.0135634	2.71579	0.00661169	0.00614854	64419	27201	26473
MI375	WM563	WM436	0.0417689	7.72462	1.13243e-14	0.0193581	52007	23557	21668
WM436	MI375	WM579	0.0211595	5.16822	2.3634e-07	0.00836342	56545	26157	25073
WM436	MI375	WM580	0.0193034	4.70503	2.53825e-06	0.00764612	56221	26059	25072
WM436	MI375	WM581	0.0218351	4.67131	2.99279e-06	0.00864589	56352	26160	25042
MI375	XJ160	WM436	0.00553407	1.29463	0.195448	0.00252314	64537	27164	26865
MI375	WM441	WM442	0.0636493	14.4686	2.3e-16	0.0387712	37979	37742	33225
MI375	WM441	WM561	0.172104	35.6705	2.3e-16	0.115854	34346	43740	30895
MI375	WM441	WM562	0.0646414	17.8828	2.3e-16	0.0421484	37757	37708	33129
WM563	WM441	MI375	0.0818082	14.939	2.3e-16	0.0663985	31054	30884	26213
MI375	WM441	WM579	0.0472835	9.45528	2.3e-16	0.0136726	90746	19469	17711
MI375	WM441	WM580	0.0419514	8.12774	4.44089e-16	0.012119	90502	19286	17733
MI375	WM441	WM581	0.0433535	8.85005	2.3e-16	0.0124925	90512	19277	17675
MI375	WM441	XJ160	0.0499482	11.7211	2.3e-16	0.0304911	38378	36965	33448
WM442	WM561	MI375	0.0233689	5.70374	1.17207e-08	0.0144952	58817	26516	25305
WM442	WM562	MI375	0.00241357	0.53572	0.592152	0.00157843	55801	27619	27486
WM563	MI375	WM442	0.0278979	5.00994	5.44458e-07	0.0167384	29347	30176	28538
MI375	WM442	WM579	0.0551202	13.1802	2.3e-16	0.0164113	86353	20195	18085
MI375	WM442	WM580	0.0511715	10.6595	2.3e-16	0.0152875	86168	20121	18162
MI375	WM442	WM581	0.0484387	9.59318	2.3e-16	0.0143957	86207	19978	18132
XJ160	WM442	MI375	0.00374212	0.63232	0.527178	0.00187024	72423	21190	21032
WM562	WM561	MI375	0.0192183	5.37913	7.48478e-08	0.0131601	52069	29089	27992
WM563	MI375	WM561	0.0188057	4.24503	2.1856e-05	0.0119347	28088	29986	28879
MI375	WM561	WM579	0.0354781	7.38904	1.47882e-13	0.0103712	86852	19263	17943
MI375	WM561	WM580	0.0330681	5.63558	1.74466e-08	0.00969649	86655	19213	17983
MI375	WM561	WM581	0.0280932	5.46283	4.68605e-08	0.00822177	86789	19103	18059
XJ160	WM561	MI375	0.0267629	5.26694	1.38713e-07	0.0167439	58116	26894	25492
WM563	MI375	WM562	0.0219402	4.25048	2.13308e-05	0.014124	28904	29950	28664
MI375	WM562	WM579	0.0383714	7.81722	5.32907e-15	0.0113434	86611	19714	18257
MI375	WM562	WM580	0.0383369	6.18188	6.33424e-10	0.0113638	86349	19704	18249
MI375	WM562	WM581	0.0368088	6.33213	2.41793e-10	0.0109109	86456	19689	18291
XJ160	WM562	MI375	0.00549421	1.48806	0.136735	0.00358898	55556	27726	27423
WM563	MI375	WM579	0.0028866	0.534736	0.592832	0.000866956	70891	15808	15717
WM563	MI375	WM580	0.00914983	1.61092	0.107197	0.00274744	70733	15882	15594
WM563	MI375	WM581	0.00837032	1.34094	0.179941	0.00251983	70860	15902	15638
WM563	MI375	XJ160	0.0260887	4.58782	4.47902e-06	0.015782	29312	30088	28558
WM579	WM580	MI375	0.0116903	1.56443	0.117717	0.00128468	100706	8481	8285
WM579	WM581	MI375	0.0112673	1.40431	0.160225	0.00121809	100922	8347	8161
MI375	XJ160	WM579	0.0333237	5.98429	2.1733e-09	0.00990222	86577	19737	18464
WM581	WM580	MI375	0.000474271	0.0605225	0.951739	5.25045e-05	99967	8438	8430
MI375	XJ160	WM580	0.0325511	5.8971	3.69952e-09	0.0096776	86277	19667	18427
MI375	XJ160	WM581	0.0309961	5.11165	3.19355e-07	0.00919413	86350	19608	18429
MI605	MI377	MI711	0.0723812	15.445	2.3e-16	0.033291	27757	18816	16276
MI605	MI377	MI722	0.0726326	10.7889	2.3e-16	0.0347843	19822	12981	11223
MI894	MI377	MI605	0.0160453	2.60271	0.00924904	0.00751416	45786	13108	12694
WM009	MI377	MI605	0.0176073	2.82148	0.00478024	0.00889942	48684	15200	14674
MI377	WM056	MI605	0.0137296	2.33961	0.0193037	0.00691224	50589	14804	14403
MI605	WM329	MI377	0.217542	39.7162	2.3e-16	0.103676	31061	25597	16450
MI605	WM330	MI377	0.21954	43.8305	2.3e-16	0.104392	31080	25639	16408
MI605	WM340	MI377	0.232879	52.826	2.3e-16	0.1106	31279	25888	16108
MI605	WM436	MI377	0.22428	51.4403	2.3e-16	0.106639	30910	25716	16294
WM441	MI377	MI605	0.00161234	0.268164	0.788573	0.00078505	52118	14288	14242
WM442	MI377	MI605	0.00633994	1.17826	0.238693	0.00321773	48548	15000	14811
WM561	MI377	MI605	0.00730969	1.33987	0.180288	0.00369797	48599	14814	14599
[truncated: 1,128 more rows]

## Sheet: Tab. S9 Dstat_BBAA
P1	P2	P3	Dstatistic	Z-score	p-value	f4-ratio	BBAA	ABBA	BABA
MI058	MI096	FV396	0.0821521	14.0675	2.3e-16	0.0515019	18512	17368	14731
FV396	MI058	MI1081	0.00667743	1.32718	0.184448	0.00551858	32609	25252	24917
MI058	FV396	MI2950	0.0580041	12.9725	2.3e-16	0.0295983	42694	17620	15688
MI058	FV396	MI3071	0.00883012	1.10662	0.268457	0.00338088	52794	11482	11281
MI058	FV396	MI3076	0.00447864	1.01091	0.312061	0.00352076	44478	26241	26007
FV396	MI375	MI058	0.0239635	5.0056	5.56886e-07	0.0154047	31335	26920	25660
FV396	MI377	MI058	0.0133449	3.30104	0.000963267	0.00843321	36467	29121	28354
MI058	FV396	MI605	0.0452534	8.32013	2.3e-16	0.0240248	35643	12519	11435
MI058	FV396	MI711	0.0126988	2.78096	0.00541981	0.0042188	72374	17385	16949
MI058	FV396	MI722	0.00308968	0.690461	0.489904	0.00106763	53923	12337	12261
FV396	MI894	MI058	0.00894847	1.52377	0.127565	0.00573977	33517	28075	27577
MI058	WM009	FV396	0.0713366	14.8497	2.3e-16	0.03957	45838	28279	24513
WM056	FV396	MI058	0.00931227	1.61717	0.105841	0.00532257	47777	26446	25958
MI058	FV396	WM329	0.104535	23.1855	2.3e-16	0.0440345	55270	27678	22439
MI058	FV396	WM330	0.105424	28.2836	2.3e-16	0.0443868	55274	27818	22512
MI058	FV396	WM340	0.11621	27.4999	2.3e-16	0.0515829	54501	28335	22435
MI058	FV396	WM436	0.0911533	21.1128	2.3e-16	0.0432984	55091	27622	23007
FV396	WM441	MI058	0.0495463	15.0239	2.3e-16	0.0317119	39646	30885	27969
MI058	WM442	FV396	0.0751173	18.6832	2.3e-16	0.0351831	54955	23952	20605
MI058	WM561	FV396	0.0877873	16.7931	2.3e-16	0.0461581	48187	26957	22606
MI058	WM562	FV396	0.0713703	16.0079	2.3e-16	0.0395682	45766	28229	24468
WM563	FV396	MI058	0.0387562	8.8156	2.3e-16	0.0242556	31409	25087	23215
MI058	FV396	WM579	0.048507	10.7236	2.3e-16	0.0151461	74156	18611	16889
MI058	FV396	WM580	0.0478317	9.53549	2.3e-16	0.0149148	73954	18533	16841
MI058	FV396	WM581	0.049925	11.5169	2.3e-16	0.0155288	74127	18559	16794
MI058	XJ160	FV396	0.0618645	13.2203	2.3e-16	0.0289039	55215	23601	20851
MI096	FV396	MI1081	0.000369094	0.0668308	0.946716	0.000284071	24069	16262	16250
MI096	FV396	MI2950	0.0290242	3.94101	8.11391e-05	0.0142001	30692	11168	10538
FV396	MI096	MI3071	0.00815328	1.23564	0.216591	0.00302039	37027	7419	7299
MI096	FV396	MI3076	0.00346787	0.647902	0.517048	0.00254344	33233	17217	17098
MI375	FV396	MI096	0.0140192	2.55569	0.0105977	0.0109601	19911	18806	18286
MI377	FV396	MI096	0.0184581	5.34582	9.00093e-08	0.0141711	23351	20912	20154
MI096	FV396	MI605	0.0306385	3.28242	0.00102922	0.0154429	25103	7821	7356
FV396	MI096	MI711	0.0121133	2.2141	0.026822	0.00388659	53050	11614	11336
FV396	MI096	MI722	0.0259287	3.59354	0.000326217	0.00862319	38569	8230	7814
MI894	FV396	MI096	0.024348	3.54574	0.000391507	0.0187198	21495	20110	19154
WM009	MI096	FV396	0.0120852	2.29254	0.0218747	0.0080525	24450	21732	21213
WM056	FV396	MI096	0.00826314	1.72181	0.085104	0.00582411	30724	18913	18603
MI096	FV396	WM329	0.0758299	13.7884	2.3e-16	0.0306197	40766	18018	15478
MI096	FV396	WM330	0.0728666	11.255	2.3e-16	0.0295254	40846	18066	15612
MI096	FV396	WM340	0.0789057	12.9569	2.3e-16	0.0340625	40344	18418	15724
MI096	FV396	WM436	0.0595898	15.3779	2.3e-16	0.0272081	40902	17977	15955
FV396	WM441	MI096	0.0311167	8.57924	2.3e-16	0.0248824	25480	22003	20675
WM442	MI096	FV396	0.018768	3.53562	0.000406818	0.0123795	24929	21740	20939
WM561	MI096	FV396	0.00607917	1.0192	0.308108	0.00412533	24104	21680	21418
WM562	MI096	FV396	0.00963149	1.57689	0.114821	0.00644278	24424	21699	21285
WM563	FV396	MI096	0.0570472	13.0981	2.3e-16	0.0431115	19684	17992	16050
MI096	FV396	WM579	0.0301577	5.79082	7.00431e-09	0.00908883	54357	12246	11529
MI096	FV396	WM580	0.0275693	6.15448	7.53225e-10	0.00831923	54222	12188	11534
MI096	FV396	WM581	0.0240135	4.7361	2.17869e-06	0.00724204	54362	12132	11563
XJ160	MI096	FV396	0.0260399	4.59939	4.23737e-06	0.0172981	25063	22164	21039
MI1081	FV396	MI2950	0.0601519	9.61371	2.3e-16	0.0329255	41699	20938	18562
MI1081	FV396	MI3071	0.0197507	3.25369	0.00113916	0.00810164	53172	13992	13450
MI1081	FV396	MI3076	0.0448965	8.23449	2.3e-16	0.0360248	41718	31489	28783
MI375	FV396	MI1081	0.0204514	4.30646	1.65889e-05	0.015153	41193	26470	25409
MI377	FV396	MI1081	0.0148383	2.85642	0.00428442	0.0108708	47267	28862	28018
MI1081	FV396	MI605	0.0381021	5.47444	4.38901e-08	0.0218125	35529	15053	13948
MI1081	FV396	MI711	0.0365241	8.69981	2.3e-16	0.0130064	71851	21029	19547
MI1081	FV396	MI722	0.0230894	4.64004	3.48336e-06	0.00852291	53664	14866	14195
MI894	FV396	MI1081	0.0218907	3.34158	0.000833024	0.0162036	43819	28149	26943
FV396	WM009	MI1081	0.0216644	5.34969	8.81072e-08	0.0175768	45000	32233	30866
WM056	FV396	MI1081	0.0139362	2.72289	0.00647145	0.00944704	59824	26774	26038
MI1081	FV396	WM329	0.114448	23.0694	2.3e-16	0.0521776	53435	33249	26420
MI1081	FV396	WM330	0.112477	34.3894	2.3e-16	0.0513956	53358	33391	26639
MI1081	FV396	WM340	0.117319	27.6079	2.3e-16	0.0566845	52473	33819	26717
MI1081	FV396	WM436	0.109727	29.989	2.3e-16	0.0556978	53355	33218	26649
FV396	WM441	MI1081	0.020812	3.46303	0.000534122	0.0157185	51275	29969	28747
FV396	WM442	MI1081	0.0296639	5.15106	2.59013e-07	0.0241703	44466	32611	30732
FV396	WM561	MI1081	0.0343886	8.7491	2.3e-16	0.0278359	44710	32215	30073
FV396	WM562	MI1081	0.0269487	4.7945	1.6308e-06	0.0217968	44723	32258	30565
WM563	FV396	MI1081	0.0586127	12.045	2.3e-16	0.0424021	40345	25403	22590
MI1081	FV396	WM579	0.0649079	16.1345	2.3e-16	0.0217036	73643	22362	19636
MI1081	FV396	WM580	0.0651884	14.3061	2.3e-16	0.021847	73455	22337	19603
MI1081	FV396	WM581	0.0625164	15.8603	2.3e-16	0.0208955	73591	22239	19622
FV396	XJ160	MI1081	0.0315301	6.7428	1.55362e-11	0.0258871	44061	32912	30900
MI2950	FV396	MI3071	0.0182897	2.79826	0.00513786	0.00939321	31139	14587	14063
MI3076	FV396	MI2950	0.0844754	15.5687	2.3e-16	0.0484918	41769	26510	22380
MI375	FV396	MI2950	0.0317265	6.72558	1.74893e-11	0.015388	52471	18406	17274
MI377	FV396	MI2950	0.016106	2.73869	0.00616845	0.00770929	60337	19936	19304
MI605	MI2950	FV396	0.143759	21.8399	2.3e-16	0.0517137	24067	14675	10986
MI2950	FV396	MI711	0.0469839	11.7476	2.3e-16	0.0207851	41914	22607	20578
MI2950	FV396	MI722	0.0403458	7.20104	5.97522e-13	0.0184843	31138	15884	14652
MI894	FV396	MI2950	0.036031	6.08358	1.1753e-09	0.0172959	56128	19567	18206
WM009	FV396	MI2950	0.0483924	11.4976	2.3e-16	0.0242223	58872	22141	20097
WM056	FV396	MI2950	0.00675291	1.41298	0.15766	0.00304226	71106	18561	18312
MI2950	WM329	FV396	0.130599	21.6019	2.3e-16	0.055112	45594	29040	22331
MI2950	WM330	FV396	0.136499	28.8467	2.3e-16	0.057576	45840	29237	22214
MI2950	WM340	FV396	0.156971	28.5399	2.3e-16	0.0655446	45869	29464	21469
MI2950	WM436	FV396	0.131572	31.3753	2.3e-16	0.0550633	45640	28863	22151
WM441	FV396	MI2950	0.0253136	9.97406	2.3e-16	0.0120855	64426	20394	19387
WM442	FV396	MI2950	0.0429352	11.0154	2.3e-16	0.021575	58593	22044	20229
WM561	FV396	MI2950	0.0373131	6.89988	5.20473e-12	0.0187001	58654	21573	20021
WM562	FV396	MI2950	0.041724	7.21612	5.34905e-13	0.0209544	58697	21971	20211
WM563	FV396	MI2950	0.0223642	3.93448	8.33756e-05	0.011201	49805	17280	16524
MI2950	FV396	WM579	0.0667207	14.9453	2.3e-16	0.0275339	43104	23670	20709
MI2950	FV396	WM580	0.0650445	14.8638	2.3e-16	0.0269277	43027	23636	20749
MI2950	FV396	WM581	0.0670331	14.5254	2.3e-16	0.0277366	43177	23686	20710
XJ160	FV396	MI2950	0.0434189	10.6506	2.3e-16	0.0219164	58209	22157	20313
MI3076	FV396	MI3071	0.011232	2.16675	0.0302538	0.00492261	54748	17151	16770
MI375	FV396	MI3071	0.00778625	1.09268	0.274535	0.0027749	64682	12296	12106
FV396	MI377	MI3071	0.00917499	1.52835	0.126425	0.00323058	74458	13694	13445
MI605	FV396	MI3071	0.0235412	3.54973	0.000385621	0.0128949	22270	12761	12174
MI3071	MI711	FV396	0.14019	19.2547	2.3e-16	0.0220581	58771	12216	9212
MI3071	MI722	FV396	0.0999535	16.1535	2.3e-16	0.0154381	42606	8281	6776
MI894	FV396	MI3071	0.000996933	0.140858	0.887982	0.000355483	69265	13053	13027
WM009	FV396	MI3071	0.0106325	1.53614	0.124504	0.0039497	73176	14733	14423
WM056	FV396	MI3071	0.0153021	2.33153	0.0197256	0.00498593	85689	12872	12484
FV396	WM329	MI3071	0.0427876	5.5622	2.66395e-08	0.021407	48669	20350	18680
FV396	WM330	MI3071	0.0456402	5.97074	2.36173e-09	0.0228744	48895	20482	18694
FV396	WM340	MI3071	0.00182429	0.343012	0.731589	0.000882613	50203	18946	18877
WM436	FV396	MI3071	0.0279105	5.64744	1.62853e-08	0.0135017	49752	19685	18616
WM441	FV396	MI3071	0.00609111	0.848241	0.396304	0.0021325	78785	13792	13625
FV396	WM442	MI3071	0.00293134	0.496268	0.619706	0.00108769	72490	14541	14456
FV396	WM561	MI3071	0.00739906	1.04889	0.29423	0.00271985	72419	14296	14086
FV396	WM562	MI3071	0.00148609	0.178117	0.858631	0.000550844	72658	14489	14446
WM563	FV396	MI3071	0.0276904	4.39668	1.0992e-05	0.0101429	60649	11765	11131
MI3071	WM579	FV396	0.140578	23.4759	2.3e-16	0.0232639	60960	13083	9858
MI3071	WM580	FV396	0.147326	26.2539	2.3e-16	0.0244876	60971	13204	9813
MI3071	WM581	FV396	0.140268	25.007	2.3e-16	0.0232233	61179	13084	9865
XJ160	FV396	MI3071	0.00137014	0.219861	0.82598	0.000511679	72253	14617	14577
MI375	FV396	MI3076	0.0153539	3.21774	0.00129206	0.010983	55193	27444	26614
MI377	FV396	MI3076	0.0059252	1.39201	0.163919	0.00419189	62752	29625	29276
MI3076	FV396	MI605	0.0595208	10.2148	2.3e-16	0.0356833	36491	19038	16899
MI3076	FV396	MI711	0.0304061	6.5751	4.86189e-11	0.0114874	72376	25450	23948
MI3076	FV396	MI722	0.020604	4.56731	4.94024e-06	0.0080943	55185	18402	17659
MI894	FV396	MI3076	0.0171728	3.61583	0.000299385	0.0122481	58514	29142	28158
FV396	WM009	MI3076	0.0194135	5.7905	7.01767e-09	0.0150834	60171	33213	31948
WM056	FV396	MI3076	0.0110692	2.16377	0.0304817	0.00727385	77482	27859	27249
MI3076	FV396	WM329	0.140038	32.5481	2.3e-16	0.0665137	52807	41189	31070
MI3076	FV396	WM330	0.140736	50.2555	2.3e-16	0.0669338	52839	41492	31254
MI3076	FV396	WM340	0.149038	32.7195	2.3e-16	0.0749843	52062	42307	31332
MI3076	FV396	WM436	0.139378	36.8233	2.3e-16	0.0738255	53045	41544	31380
FV396	WM441	MI3076	0.0168202	3.50059	0.000464231	0.0122377	67776	31012	29986
FV396	WM442	MI3076	0.0297411	7.88799	3.10862e-15	0.0232223	59566	33706	31759
FV396	WM561	MI3076	0.0256793	7.0419	1.89648e-12	0.0198921	60038	32992	31340
FV396	WM562	MI3076	0.0203666	6.59709	4.19307e-11	0.0157703	59950	33091	31770
WM563	FV396	MI3076	0.0518881	13.4885	2.3e-16	0.0366081	53868	26658	24028
MI3076	FV396	WM579	0.0558811	11.5446	2.3e-16	0.019834	74116	26935	24084
MI3076	FV396	WM580	0.0528548	11.14	2.3e-16	0.0188007	73823	26812	24120
MI3076	FV396	WM581	0.0537076	12.9192	2.3e-16	0.0190531	74015	26800	24068
FV396	XJ160	MI3076	0.0242889	6.11529	9.63844e-10	0.0191007	59261	33758	32157
MI377	FV396	MI375	0.0212383	4.36156	1.29137e-05	0.0174934	36205	34044	32628
MI375	FV396	MI605	0.0312847	4.80949	1.5132e-06	0.0157543	44664	13466	12649
MI375	FV396	MI711	0.00105479	0.196865	0.843933	0.000326144	87943	18032	17994
FV396	MI375	MI722	0.010091	1.87371	0.0609701	0.00325453	66075	13263	12998
MI894	MI375	FV396	0.00119935	0.20997	0.833691	0.00069397	38945	27548	27482
MI375	FV396	WM009	0.0167009	4.21344	2.51505e-05	0.0107139	38342	35613	34443
WM056	FV396	MI375	0.0122003	2.62048	0.00878062	0.00932817	48195	31195	30443
MI375	FV396	WM329	0.0742254	17.7593	2.3e-16	0.0300284	67287	28793	24814
MI375	FV396	WM330	0.0677884	20.5883	2.3e-16	0.0274041	67095	28684	25042
MI375	FV396	WM340	0.0799355	18.698	2.3e-16	0.0343763	66456	29479	25115
MI375	FV396	WM436	0.0583384	17.2261	2.3e-16	0.026496	67115	28491	25350
FV396	WM441	MI375	0.0123918	3.24946	0.00115625	0.010639	40061	34967	34111
MI375	FV396	WM442	0.0126005	3.25225	0.00114495	0.00758538	38553	35520	34636
MI375	FV396	WM561	0.0109605	2.98952	0.00279415	0.00693342	37354	35465	34696
MI375	FV396	WM562	0.0160571	3.89918	9.65197e-05	0.0103426	38231	35562	34438
WM563	FV396	MI375	0.0739992	14.8573	2.3e-16	0.0593167	31494	30290	26116
MI375	FV396	WM579	0.0418824	8.82389	2.3e-16	0.0121371	90072	19416	17855
MI375	FV396	WM580	0.0397881	7.3736	1.66089e-13	0.0116001	89906	19430	17943
MI375	FV396	WM581	0.0384904	7.54677	4.4631e-14	0.0111943	89962	19372	17936
MI375	FV396	XJ160	0.00648282	1.35476	0.175495	0.00392599	38800	35165	34712
MI377	FV396	MI605	0.0252141	4.39913	1.08687e-05	0.0125154	51426	14902	14169
FV396	MI377	MI711	0.0119544	2.74878	0.00598177	0.00362467	99576	19893	19423
FV396	MI377	MI722	0.0225407	4.48642	7.24296e-06	0.00708367	75467	14698	14050
MI377	FV396	MI894	0.0224379	5.0527	4.35611e-07	0.018567	38330	36021	34440
MI377	FV396	WM009	0.0242126	5.58712	2.30864e-08	0.0152198	44373	39086	37238
WM056	FV396	MI377	0.0166986	3.19857	0.00138111	0.0129798	51475	35009	33859
MI377	FV396	WM329	0.0584136	21.6866	2.3e-16	0.023317	76017	30830	27427
MI377	FV396	WM330	0.0577997	21.5755	2.3e-16	0.0230136	75890	30874	27500
MI377	FV396	WM340	0.068962	23.7758	2.3e-16	0.0291976	75104	31668	27582
MI377	FV396	WM436	0.0488856	14.0911	2.3e-16	0.0219489	75945	30800	27929
FV396	WM441	MI377	0.0114771	3.18128	0.00146628	0.0101418	42753	39350	38457
MI377	FV396	WM442	0.0126143	3.82018	0.000133355	0.00744276	44236	38492	37533
MI377	FV396	WM561	0.0148716	4.99476	5.89083e-07	0.00918602	43118	38557	37427
MI377	FV396	WM562	0.019065	7.87705	3.33067e-15	0.0120472	44163	38833	37380
MI377	FV396	WM563	0.0676689	15.5308	2.3e-16	0.0534874	34377	33733	29457
MI377	FV396	WM579	0.0253165	6.29491	3.07581e-10	0.00722219	101827	20817	19789
MI377	FV396	WM580	0.0241427	4.9922	5.96947e-07	0.00690627	101565	20786	19806
MI377	FV396	WM581	0.0222726	5.39991	6.66762e-08	0.0063588	101731	20723	19820
MI377	FV396	XJ160	0.0128837	3.63942	0.00027325	0.00761094	44764	38326	37351
MI605	FV396	MI711	0.0619415	17.1063	2.3e-16	0.0286586	29162	19013	16795
MI605	FV396	MI722	0.0521487	8.61096	2.3e-16	0.0252322	20933	13074	11778
MI894	FV396	MI605	0.0389161	7.4863	7.08322e-14	0.0193264	47713	14416	13336
WM009	FV396	MI605	0.0414274	7.2123	5.50227e-13	0.0214171	50443	16139	14855
WM056	FV396	MI605	0.0122183	2.44412	0.0145205	0.00571448	60173	13835	13501
MI605	WM329	FV396	0.235944	41.9266	2.3e-16	0.103444	30985	27336	16899
MI605	WM330	FV396	0.236715	47.0383	2.3e-16	0.104043	31117	27486	16964
MI605	WM340	FV396	0.258154	63.4844	2.3e-16	0.113092	31055	27870	16433
MI605	WM436	FV396	0.23566	48.3169	2.3e-16	0.103423	30987	27402	16950
WM441	FV396	MI605	0.0257997	4.29811	1.72261e-05	0.0127771	54799	15089	14330
WM442	FV396	MI605	0.0294973	6.45239	1.10103e-10	0.0154978	50013	16107	15184
WM561	FV396	MI605	0.0317553	4.62106	3.81787e-06	0.016523	49990	15823	14849
WM562	FV396	MI605	0.0277849	4.91143	9.0415e-07	0.0145362	49978	15980	15116
WM563	FV396	MI605	0.0143834	2.06144	0.0392614	0.00740899	41606	12236	11889
MI605	FV396	WM579	0.0795467	18.3143	2.3e-16	0.0346404	30126	20099	17137
MI605	FV396	WM580	0.0803237	16.9063	2.3e-16	0.035154	30019	20161	17163
MI605	FV396	WM581	0.0793258	17.5124	2.3e-16	0.0345494	30098	20076	17125
XJ160	FV396	MI605	0.0325418	7.00563	2.45892e-12	0.0171185	49754	16198	15177
MI722	MI711	FV396	0.0538482	6.82686	8.67928e-12	0.00584816	71671	8024	7204
FV396	MI894	MI711	0.000991391	0.140009	0.888653	0.00030721	93315	19184	19146
WM009	FV396	MI711	0.00324575	0.650948	0.51508	0.00104348	97112	21173	21036
WM056	FV396	MI711	0.0149467	3.07715	0.00208991	0.00417439	115400	18504	17959
FV396	WM329	MI711	0.0631633	9.365	2.3e-16	0.0280031	63181	30853	27187
FV396	WM330	MI711	0.0601117	8.48601	2.3e-16	0.0264988	63489	30642	27167
FV396	WM340	MI711	0.00625045	1.29531	0.195212	0.00263812	65461	27851	27505
WM436	FV396	MI711	0.0394635	14.9949	2.3e-16	0.0165166	65090	28987	26786
WM441	FV396	MI711	0.000100949	0.0214857	0.982858	3.0509e-05	105254	19814	19810
FV396	WM442	MI711	0.00731448	1.59716	0.110229	0.00235698	96355	21277	20968
FV396	WM561	MI711	0.00186112	0.320346	0.748706	0.000593353	96504	20725	20648
FV396	WM562	MI711	0.00404261	0.695541	0.486717	0.00129797	96708	21111	20941
WM563	FV396	MI711	0.0333889	6.43981	1.1962e-10	0.0105161	83830	17657	16516
MI711	WM579	FV396	0.0150509	2.42732	0.015211	0.00156651	105595	10015	9718
MI711	WM580	FV396	0.0228718	3.43839	0.000585174	0.00235453	105698	9973	9527
MI711	WM581	FV396	0.0125379	2.29525	0.0217188	0.00130818	105662	10014	9766
FV396	XJ160	MI711	0.000259967	0.0456259	0.963608	8.3908e-05	95889	21162	21151
FV396	MI894	MI722	0.0117993	1.70557	0.088089	0.00378775	70529	14106	13777
WM009	FV396	MI722	0.00808153	1.52927	0.126196	0.00268125	74017	15530	15281
WM056	FV396	MI722	0.00839517	1.48652	0.137142	0.00243571	87243	13453	13229
FV396	WM329	MI722	0.0584217	7.9329	2.22045e-15	0.0266458	48242	22311	19848
FV396	WM330	MI722	0.0593144	8.04527	8.88178e-16	0.0270174	48593	22342	19840
FV396	WM340	MI722	0.00873146	1.42859	0.153123	0.00380068	49927	20333	19981
WM436	FV396	MI722	0.0368359	12.3196	2.3e-16	0.0160136	49834	21195	19689
FV396	WM441	MI722	0.00314498	0.615927	0.537943	0.000982934	79913	14513	14422
FV396	WM442	MI722	0.0122386	3.13476	0.00171997	0.00408296	73456	15632	15254
FV396	WM561	MI722	0.0125381	2.17753	0.0294408	0.00412547	73389	15263	14885
FV396	WM562	MI722	0.0136265	2.10818	0.0350152	0.00453046	73535	15584	15165
WM563	FV396	MI722	0.0254333	4.24033	2.23188e-05	0.00832582	63007	12660	12032
MI722	WM579	FV396	0.0646028	10.6516	2.3e-16	0.00776478	74354	9113	8007
MI722	WM580	FV396	0.0713525	9.87729	2.3e-16	0.0084744	74227	9054	7848
MI722	WM581	FV396	0.0630673	8.78573	2.3e-16	0.00746337	74612	8959	7896
FV396	XJ160	MI722	0.00515514	1.01211	0.311486	0.00171775	73066	15501	15342
MI894	FV396	WM009	0.0317979	4.55368	5.2715e-06	0.0201773	40976	38192	35838
WM056	FV396	MI894	0.0164233	3.4116	0.000645829	0.0125082	50983	32894	31831
MI894	FV396	WM329	0.075624	16.2614	2.3e-16	0.0303873	71266	30381	26109
MI894	FV396	WM330	0.07177	18.1889	2.3e-16	0.028751	70994	30270	26216
MI894	FV396	WM340	0.0844785	20.3589	2.3e-16	0.035947	70214	31092	26248
MI894	FV396	WM436	0.0632734	18.0898	2.3e-16	0.0286325	71098	30290	26685
FV396	WM441	MI894	0.0104898	2.56064	0.0104479	0.00909995	42625	37039	36270
MI894	FV396	WM442	0.0214495	4.31955	1.56347e-05	0.0127797	40983	37716	36132
MI894	FV396	WM561	0.0192698	2.83268	0.00461602	0.0120704	39762	37661	36237
MI894	FV396	WM562	0.0282172	4.75976	1.93822e-06	0.0179086	40760	37897	35817
WM563	FV396	MI894	0.0775602	16.964	2.3e-16	0.0622654	33581	32267	27622
MI894	FV396	WM579	0.0373473	6.66079	2.72355e-11	0.01085	95515	20554	19074
MI894	FV396	WM580	0.0382621	6.56577	5.17661e-11	0.0111202	95254	20528	19015
MI894	FV396	WM581	0.0368117	7.54584	4.4853e-14	0.0106548	95439	20448	18996
MI894	FV396	XJ160	0.0157347	3.19642	0.00139144	0.00943773	41311	37409	36250
WM056	FV396	WM009	0.00940708	2.5473	0.0108559	0.00544717	57239	35249	34592
WM009	FV396	WM329	0.0570188	16.8413	2.3e-16	0.0240101	73250	32868	29322
WM009	FV396	WM330	0.0542002	21.4679	2.3e-16	0.0227953	73054	32861	29482
WM009	FV396	WM340	0.0599631	16.0219	2.3e-16	0.0269212	72190	33595	29794
WM009	FV396	WM436	0.0515431	15.2205	2.3e-16	0.0244331	73393	33050	29810
FV396	WM441	WM009	0.0483084	10.6914	2.3e-16	0.0313674	47055	41133	37342
WM442	WM009	FV396	0.00748798	2.16396	0.0304676	0.00409493	63192	31955	31480
WM009	WM561	FV396	0.0109321	2.50744	0.012161	0.00638311	58396	33799	33068
WM562	WM009	FV396	0.000995836	0.197009	0.843821	0.000571438	60292	33171	33105
WM563	FV396	WM009	0.0490782	13.6606	2.3e-16	0.0308844	37973	34169	30972
FV396	WM009	WM579	0.00109935	0.214496	0.83016	0.000335789	98460	21855	21807
FV396	WM009	WM580	0.000639415	0.12374	0.901521	0.000196409	98320	21909	21881
FV396	WM009	WM581	0.00415734	0.971217	0.33144	0.00127496	98480	21980	21798
XJ160	WM009	FV396	0.0179437	4.19744	2.69945e-05	0.00993213	62082	32875	31716
WM056	FV396	WM329	0.0137606	2.757	0.00583342	0.00524573	89707	27774	27020
WM056	FV396	WM330	0.0102616	2.16451	0.0304249	0.00390422	89556	27714	27151
WM056	FV396	WM340	0.0220334	5.07624	3.84979e-07	0.00893896	88758	28504	27275
WM056	FV396	WM436	0.0117109	3.32134	0.000895856	0.00500186	89786	27861	27216
WM056	FV396	WM441	0.00854452	1.64679	0.0996018	0.00601132	50463	38125	37479
WM056	FV396	WM442	0.00767322	1.75325	0.0795586	0.00414915	57563	35129	34594
WM056	FV396	WM561	0.00730535	1.49015	0.136185	0.00414283	56203	35092	34583
WM056	FV396	WM562	0.00202142	0.478243	0.632477	0.00117743	56987	34947	34806
WM056	FV396	WM563	0.0136604	2.97465	0.00293323	0.0104551	44183	29756	28954
WM056	FV396	WM579	0.0168357	3.63611	0.000276787	0.00448846	117265	19297	18658
WM056	FV396	WM580	0.0180332	3.14811	0.00164331	0.0048168	117055	19307	18623
WM056	FV396	WM581	0.0162245	3.10399	0.00190933	0.00431886	117220	19229	18615
WM056	FV396	XJ160	0.00798014	1.51331	0.130201	0.00431448	58084	34925	34372
WM329	WM330	FV396	0.00492685	0.885447	0.375916	0.00167613	90492	26618	26357
WM329	WM340	FV396	0.0308279	7.20073	5.98854e-13	0.011886	78763	30947	29096
WM329	WM436	FV396	0.00137881	0.351931	0.72489	0.000584735	70526	33045	32954
WM441	FV396	WM329	0.0310521	8.15905	4.44089e-16	0.0125678	80514	30448	28614
WM442	FV396	WM329	0.0522394	13.6666	2.3e-16	0.0220783	72627	32762	29509
WM561	FV396	WM329	0.057873	10.6371	2.3e-16	0.0242786	73222	32473	28920
WM562	FV396	WM329	0.0558589	13.7537	2.3e-16	0.0235929	73139	32871	29393
WM563	FV396	WM329	0.0258017	4.78532	1.70712e-06	0.0110587	63804	26518	25184
FV396	WM329	WM579	0.0692321	11.2599	2.3e-16	0.0291273	64049	32093	27937
FV396	WM329	WM580	0.0689822	9.24296	2.3e-16	0.0290304	63819	32008	27877
FV396	WM329	WM581	0.0673765	10.1727	2.3e-16	0.0283316	64077	31977	27940
XJ160	FV396	WM329	0.0640613	17.3279	2.3e-16	0.0270285	72467	33245	29242
WM330	WM340	FV396	0.0263306	7.20224	5.92415e-13	0.0102475	78639	31105	29509
WM436	WM330	FV396	0.00264686	0.676601	0.498659	0.00112952	70764	33335	33159
WM441	FV396	WM330	0.0336699	10.49	2.3e-16	0.0135642	80461	30562	28571
WM442	FV396	WM330	0.0531653	17.2767	2.3e-16	0.0224402	72618	32923	29599
WM561	FV396	WM330	0.0549657	18.022	2.3e-16	0.0230475	73074	32494	29108
WM562	FV396	WM330	0.0579536	17.282	2.3e-16	0.0243666	73057	32978	29365
WM563	FV396	WM330	0.0267569	5.27622	1.31873e-07	0.0113618	63549	26401	25025
FV396	WM330	WM579	0.0661972	9.7038	2.3e-16	0.0277543	64438	31947	27980
FV396	WM330	WM580	0.0649841	8.96005	2.3e-16	0.0272754	64262	31859	27971
FV396	WM330	WM581	0.0668938	10.3258	2.3e-16	0.0280586	64420	31938	27933
XJ160	FV396	WM330	0.0651035	22.9686	2.3e-16	0.0274509	72457	33432	29345
WM436	WM340	FV396	0.0271236	10.7535	2.3e-16	0.0114038	71463	33646	31869
WM441	FV396	WM340	0.0394085	11.6789	2.3e-16	0.0168988	79437	31136	28775
WM442	FV396	WM340	0.0573831	16.9082	2.3e-16	0.0258	71615	33509	29872
WM561	FV396	WM340	0.0662007	14.5577	2.3e-16	0.0293132	72119	33105	28994
WM562	FV396	WM340	0.0640488	16.9393	2.3e-16	0.0286366	72101	33600	29555
WM563	FV396	WM340	0.0271388	5.55547	2.76863e-08	0.0123136	62732	26834	25416
FV396	WM340	WM579	0.0177927	4.07324	4.63646e-05	0.00714251	66230	29202	28181
FV396	WM340	WM580	0.0162835	2.99181	0.00277333	0.00653778	66042	29084	28152
FV396	WM340	WM581	0.0143644	2.63957	0.00830115	0.00575135	66249	28988	28167
XJ160	FV396	WM340	0.0690783	21.8185	2.3e-16	0.0309909	71421	33986	29594
WM441	FV396	WM436	0.0346251	13.0997	2.3e-16	0.0155736	80602	30568	28522
WM442	FV396	WM436	0.0422732	13.2147	2.3e-16	0.0202223	72745	32903	30234
WM561	FV396	WM436	0.0474548	11.7255	2.3e-16	0.0224655	73212	32502	29557
WM562	FV396	WM436	0.0442719	10.8958	2.3e-16	0.0211309	73120	32893	30104
WM563	FV396	WM436	0.0141393	3.36843	0.00075597	0.00673934	63472	26072	25345
WM436	FV396	WM579	0.0488602	19.7841	2.3e-16	0.0193058	66433	30182	27370
WM436	FV396	WM580	0.0460082	14.3636	2.3e-16	0.0182222	66136	30056	27412
WM436	FV396	WM581	0.0464594	12.6816	2.3e-16	0.018381	66358	30081	27410
XJ160	FV396	WM436	0.0524601	14.8329	2.3e-16	0.0250081	72440	33273	29956
FV396	WM441	WM442	0.0532414	15.5997	2.3e-16	0.0321134	47115	41088	36934
WM561	WM441	FV396	0.116411	30.2185	2.3e-16	0.0784955	47550	42811	33883
FV396	WM441	WM562	0.0511593	13.0345	2.3e-16	0.0332714	46952	41186	37177
WM441	FV396	WM563	0.00710279	1.63527	0.101991	0.00605635	37137	33037	32571
FV396	WM441	WM579	0.00777114	1.7545	0.0793444	0.00223925	106770	20749	20429
FV396	WM441	WM580	0.00557056	1.27896	0.200911	0.00160689	106574	20669	20440
FV396	WM441	WM581	0.00733413	1.6547	0.0979851	0.00210939	106733	20671	20370
FV396	WM441	XJ160	0.0452641	11.961	2.3e-16	0.0272255	47786	40412	36912
WM442	WM561	FV396	0.0194102	4.85234	1.22015e-06	0.0101552	65969	30645	29478
WM442	WM562	FV396	0.00657576	1.29411	0.195629	0.00363329	62584	32222	31801
WM563	FV396	WM442	0.0429935	10.723	2.3e-16	0.0254985	38252	34048	31241
FV396	WM442	WM579	0.0129218	2.88447	0.00392072	0.00396112	97768	22184	21618
FV396	WM442	WM580	0.0133986	2.89807	0.00375471	0.00411217	97517	22161	21575
FV396	WM442	WM581	0.0117895	2.69761	0.00698386	0.0036092	97765	22099	21584
XJ160	WM442	FV396	0.0142244	3.15791	0.00158903	0.00594095	81058	24706	24013
WM562	WM561	FV396	0.0116314	3.30753	0.000941219	0.00676378	58569	33659	32885
WM563	FV396	WM561	0.0307115	7.5067	6.06182e-14	0.0192203	36829	33645	31640
WM561	FV396	WM579	0.00589888	1.09347	0.274186	0.00177807	98144	21486	21234
WM561	FV396	WM580	0.00482684	0.888961	0.374024	0.00145813	97919	21442	21236
WM561	FV396	WM581	0.00907942	1.80748	0.070688	0.00273868	98249	21561	21173
XJ160	WM561	FV396	0.0307376	10.1707	2.3e-16	0.0160537	65240	31119	29263
WM563	FV396	WM562	0.038813	12.0753	2.3e-16	0.0246342	37611	33817	31290
WM562	FV396	WM579	0.000643116	0.116741	0.907065	0.00019611	98291	21783	21755
FV396	WM562	WM580	0.00171959	0.315628	0.752285	0.000526793	98073	21845	21770
FV396	WM562	WM581	0.00142319	0.290122	0.771723	0.000434886	98287	21813	21751
XJ160	WM562	FV396	0.0170024	4.38373	1.16664e-05	0.00938637	62600	32719	31625
WM563	FV396	WM579	0.0467226	9.31475	2.3e-16	0.0139172	85396	18516	16863
WM563	FV396	WM580	0.0488301	9.17847	2.3e-16	0.0145748	85265	18558	16830
WM563	FV396	WM581	0.0462559	8.39962	2.3e-16	0.0137649	85435	18457	16825
WM563	FV396	XJ160	0.0354291	7.46918	8.06022e-14	0.0210619	38340	33580	31282
WM579	WM580	FV396	0.00725197	1.18315	0.236751	0.000734203	112088	9792	9651
WM581	WM579	FV396	0.00186278	0.282119	0.777852	0.000187264	112457	9681	9645
XJ160	FV396	WM579	0.00593391	1.07357	0.283014	0.0018164	97518	22038	21778
WM581	WM580	FV396	0.00877237	1.0725	0.283498	0.000900755	111403	9947	9774
XJ160	FV396	WM580	0.00459439	0.881488	0.378054	0.00140863	97245	21975	21774
XJ160	FV396	WM581	0.00451642	0.962314	0.335892	0.00138572	97522	22019	21821
MI096	MI058	MI1081	0.0091338	1.13167	0.257774	0.00665468	18418	11656	11445
MI058	MI096	MI2950	0.0435016	5.88418	4.00026e-09	0.0195447	23019	7784	7135
MI058	MI096	MI3071	0.0356148	4.43054	9.3997e-06	0.0124082	27336	5205	4847
MI058	MI096	MI3076	0.00640512	1.17178	0.241287	0.00448217	25825	12570	12410
MI058	MI096	MI375	0.0422047	6.75324	1.4458e-11	0.031799	15544	14125	12981
MI058	MI096	MI377	0.049044	8.41522	2.3e-16	0.0361478	17740	16021	14523
MI058	MI096	MI605	0.0258426	2.81933	0.00481241	0.0120886	18371	5220	4957
MI058	MI096	MI711	0.0382784	5.31027	1.09465e-07	0.0117094	40554	8612	7977
MI058	MI096	MI722	0.0487783	4.8324	1.34897e-06	0.0154162	28642	5902	5353
MI058	MI096	MI894	0.0469581	8.25807	2.3e-16	0.0351785	16928	15161	13801
MI058	WM009	MI096	0.0305	6.13144	8.7085e-10	0.0221859	21777	14900	14018
MI058	MI096	WM056	0.0818673	12.9938	2.3e-16	0.0518401	18617	17219	14613
MI058	MI096	WM329	0.0388905	5.75377	8.72753e-09	0.0143387	32407	12248	11331
MI058	MI096	WM330	0.0439519	7.60302	2.88658e-14	0.0162486	32466	12363	11322
MI058	MI096	WM340	0.0456075	8.58426	2.3e-16	0.0177075	32143	12426	11342
MI058	MI096	WM436	0.0347532	7.28101	3.31291e-13	0.0145772	32280	12401	11568
MI058	MI096	WM441	0.0663419	13.4122	2.3e-16	0.0435951	17873	17729	15523
MI058	WM442	MI096	0.0512195	9.1642	2.3e-16	0.0317061	26250	12930	11670
MI058	WM561	MI096	0.0244824	3.52102	0.000429885	0.0168082	23126	13830	13169
MI058	WM562	MI096	0.0295432	4.198	2.69279e-05	0.0214889	21684	14863	14010
MI058	MI096	WM563	0.0663078	8.92513	2.3e-16	0.045637	15334	13074	11448
MI058	MI096	WM579	0.0298192	4.19833	2.68888e-05	0.00848519	41875	8772	8264
MI058	MI096	WM580	0.0326935	4.43698	9.12307e-06	0.00933452	41768	8797	8240
MI058	MI096	WM581	0.0393849	6.99914	2.57527e-12	0.0112119	41974	8854	8183
MI058	XJ160	MI096	0.03917	5.68173	1.33338e-08	0.0241294	26557	12721	11762
MI1081	MI058	MI2950	0.00209205	0.312001	0.75504	0.00110233	31735	14370	14310
MI1081	MI058	MI3071	0.0149759	2.12137	0.0338904	0.00604114	39592	10200	9899
MI1081	MI058	MI3076	0.0416993	7.59519	3.06422e-14	0.0327359	32283	23907	21993
MI375	MI058	MI1081	0.0268808	7.67368	1.66533e-14	0.0205723	28872	21259	20146
MI377	MI058	MI1081	0.0204412	3.88224	0.000103498	0.0158408	31840	23937	22978
MI058	MI1081	MI605	0.0038153	0.512585	0.608242	0.00208228	26223	10261	10183
MI1081	MI058	MI711	0.024654	5.08242	3.72658e-07	0.00868963	55310	15918	15152
MI1081	MI058	MI722	0.0180222	2.22183	0.0262947	0.00656532	40143	11015	10625
MI894	MI058	MI1081	0.0264764	4.78718	1.69137e-06	0.0204223	30303	22874	21694
MI058	WM009	MI1081	0.0163278	3.51301	0.000443066	0.0109484	45470	20572	19911
WM056	MI058	MI1081	0.0183363	3.67231	0.000240366	0.0149845	32275	25297	24386
MI1081	MI058	WM329	0.0210754	4.01803	5.86863e-05	0.00910207	42631	22456	21529
MI1081	MI058	WM330	0.0148103	3.19013	0.00142211	0.00639538	42602	22372	21719
MI1081	MI058	WM340	0.0106141	2.28161	0.0225126	0.00482894	42040	22423	21952
MI1081	MI058	WM436	0.0266115	4.95619	7.18888e-07	0.0128404	42298	22703	21526
MI058	WM441	MI1081	0.00985332	1.99988	0.0455135	0.00800305	34041	24751	24268
MI058	WM442	MI1081	0.0292696	4.68293	2.82809e-06	0.0167534	53306	17776	16765
MI058	WM561	MI1081	0.0333997	6.20461	5.48334e-10	0.0210761	47388	19477	18218
MI058	WM562	MI1081	0.0225538	3.93945	8.16698e-05	0.0150937	45200	20629	19719
WM563	MI058	MI1081	0.0573907	12.4074	2.3e-16	0.0451709	25906	21271	18962
MI1081	MI058	WM579	0.0206702	3.85562	0.000115437	0.00680013	57179	16295	15635
MI1081	MI058	WM580	0.018983	3.31573	0.000914036	0.0062416	57028	16211	15607
MI1081	MI058	WM581	0.0179792	3.54049	0.000399392	0.00589486	57159	16165	15594
MI058	XJ160	MI1081	0.0347439	5.90816	3.45951e-09	0.0197693	53198	17765	16572
MI2950	MI058	MI3071	0.00963844	1.2502	0.211226	0.00502833	21598	10737	10532
MI3076	MI058	MI2950	0.0317746	5.85945	4.64403e-09	0.0175981	32030	18655	17506
MI058	MI375	MI2950	0.0319662	5.50803	3.62875e-08	0.0151603	37277	13914	13052
MI058	MI377	MI2950	0.0483341	6.19772	5.72887e-10	0.0230761	41907	16126	14639
MI605	MI2950	MI058	0.138939	21.2084	2.3e-16	0.0485906	17748	10132	7660
MI2950	MI058	MI711	0.0330783	7.15749	8.21787e-13	0.014935	30099	17349	16238
MI2950	MI058	MI722	0.0352585	6.18715	6.12628e-10	0.0164676	21803	11965	11150
MI058	MI894	MI2950	0.0290871	5.10315	3.34038e-07	0.0139335	39888	15054	14203
MI058	WM009	MI2950	0.0108151	2.08033	0.0374948	0.00439672	55254	13412	13125
MI058	WM056	MI2950	0.0524295	8.57572	2.3e-16	0.0270262	42169	17544	15796
MI2950	WM329	MI058	0.0856095	10.8527	2.3e-16	0.034164	36795	20131	16956
MI2950	WM330	MI058	0.0885519	12.7807	2.3e-16	0.0354183	37093	20277	16978
MI2950	WM340	MI058	0.100513	14.6167	2.3e-16	0.039732	37345	20261	16560
MI2950	WM436	MI058	0.101266	14.0979	2.3e-16	0.0402265	36685	20358	16614
MI058	WM441	MI2950	0.0365873	6.16564	7.01965e-10	0.0178218	44488	16475	15312
MI058	WM442	MI2950	0.020793	2.89674	0.00377066	0.00723283	62582	11586	11114
MI058	WM561	MI2950	0.0242994	4.85402	1.20981e-06	0.00929973	56950	12646	12046
MI058	WM562	MI2950	0.0234387	3.41268	0.000643266	0.00941963	54931	13405	12791
MI058	WM563	MI2950	0.0371504	5.57477	2.47853e-08	0.0191016	33121	13889	12894
MI2950	MI058	WM579	0.027104	5.90432	3.5411e-09	0.0113855	31523	17678	16745
MI2950	MI058	WM580	0.0247216	4.77036	1.83898e-06	0.0103816	31345	17575	16727
MI2950	MI058	WM581	0.0263166	4.85176	1.22373e-06	0.0110437	31511	17608	16705
MI058	XJ160	MI2950	0.0211202	3.38025	0.0007242	0.0073099	62642	11531	11054
MI3076	MI058	MI3071	0.00125599	0.280821	0.778848	0.000546868	41084	12755	12723
MI058	MI375	MI3071	0.00733154	1.2455	0.212948	0.00264607	45908	9343	9207
MI058	MI377	MI3071	0.0219122	3.52318	0.000426403	0.00799153	51930	10913	10445
MI605	MI058	MI3071	0.0221089	2.08798	0.0368001	0.0121594	15415	9223	8824
MI3071	MI711	MI058	0.148983	16.7545	2.3e-16	0.0239416	44524	9351	6926
MI3071	MI722	MI058	0.118641	15.058	2.3e-16	0.0188371	31287	6256	4929
MI058	MI894	MI3071	0.00952001	1.818	0.069064	0.00345726	48874	10127	9936
WM009	MI058	MI3071	0.0050583	0.525222	0.599429	0.00159535	65258	9438	9343
WM056	MI058	MI3071	0.000308656	0.0444061	0.964581	0.000118971	52157	11343	11336
MI058	WM329	MI3071	0.0487143	6.57818	4.7625e-11	0.0254189	34036	16232	14724
MI058	WM330	MI3071	0.0512539	6.50753	7.63947e-11	0.0267479	34201	16306	14716
MI058	WM340	MI3071	0.0104576	1.80372	0.071276	0.00533194	34921	15315	14998
WM436	MI058	MI3071	0.0185562	3.41075	0.000647847	0.00929061	35100	15287	14730
MI058	WM441	MI3071	0.000904077	0.136598	0.891349	0.000336536	54419	11071	11051
MI058	WM442	MI3071	0.0165499	1.88183	0.0598591	0.00449238	72415	8200	7933
MI058	WM561	MI3071	0.0255737	3.07361	0.00211484	0.00762904	66643	8983	8535
MI058	WM562	MI3071	0.0181469	2.11185	0.034699	0.00572786	64893	9538	9198
WM563	MI058	MI3071	0.012027	2.05286	0.0400862	0.00471181	40532	9214	8995
MI3071	WM579	MI058	0.10226	14.931	2.3e-16	0.017148	46510	9534	7765
MI3071	WM580	MI058	0.109133	13.916	2.3e-16	0.0183248	46495	9594	7706
MI3071	WM581	MI058	0.103875	10.9377	2.3e-16	0.017412	46633	9543	7747
MI058	XJ160	MI3071	0.0135646	1.41776	0.156262	0.00368526	72451	8182	7963
MI375	MI058	MI3076	0.00665546	1.41773	0.156268	0.00489068	39507	21856	21567
MI377	MI058	MI3076	0.00191798	0.437746	0.66157	0.00142979	43522	24552	24458
MI3076	MI058	MI605	0.020405	4.78679	1.69467e-06	0.0118077	27105	13252	12722
MI3076	MI058	MI711	0.015301	4.53377	5.79405e-06	0.00577775	55937	19608	19017
MI3076	MI058	MI722	0.0147898	2.93718	0.00331215	0.00579467	41667	13963	13556
MI894	MI058	MI3076	0.0126718	2.55363	0.0106607	0.00938276	41466	23695	23102
MI058	WM009	MI3076	0.0267923	6.39671	1.58761e-10	0.0169864	59929	21634	20505
WM056	MI058	MI3076	0.00506698	1.38733	0.165341	0.00398882	43921	26183	25919
MI3076	MI058	WM329	0.0503486	12.7389	2.3e-16	0.0227979	42358	28476	25746
MI3076	MI058	WM330	0.0492928	15.587	2.3e-16	0.0223451	42342	28599	25912
MI3076	MI058	WM340	0.0504955	11.4916	2.3e-16	0.0240395	41866	28834	26062
MI3076	MI058	WM436	0.0625697	14.1408	2.3e-16	0.0316037	42156	29065	25642
MI058	WM441	MI3076	0.0193377	4.09218	4.27345e-05	0.0148708	46347	26040	25052
MI058	WM442	MI3076	0.0458243	7.66443	1.79856e-14	0.0249247	69495	18897	17241
MI058	WM561	MI3076	0.036799	7.04579	1.84408e-12	0.0219201	62402	20328	18885
MI058	WM562	MI3076	0.0280623	5.9889	2.11259e-09	0.017792	59861	21633	20452
WM563	MI058	MI3076	0.0405961	7.35037	1.9762e-13	0.0308233	35621	22134	20407
MI3076	MI058	WM579	0.0131834	5.19223	2.07785e-07	0.00465311	57891	20097	19574
MI3076	MI058	WM580	0.00955076	2.69067	0.00713081	0.00337485	57650	19978	19600
MI3076	MI058	WM581	0.00998125	3.84393	0.000121079	0.00351109	57807	19934	19540
MI058	XJ160	MI3076	0.0386388	6.05355	1.41686e-09	0.0209525	69593	18709	17317
MI377	MI375	MI058	0.0104523	1.70797	0.087642	0.00659922	28861	25570	25041
MI058	MI375	MI605	0.0149942	2.68687	0.00721251	0.00738312	30938	9680	9394
MI058	MI375	MI711	0.0163752	3.50878	0.00045017	0.00518214	64159	14648	14176
MI058	MI375	MI722	0.0177515	2.5335	0.0112929	0.00585069	47307	10406	10043
MI894	MI375	MI058	0.0212552	2.64086	0.0082697	0.0110416	33329	20348	19501
MI058	WM009	MI375	0.0275965	6.37872	1.7857e-10	0.0186338	39889	23459	22199
WM056	MI375	MI058	0.0319057	5.85451	4.78426e-09	0.0204357	30678	26925	25260
MI058	MI375	WM329	0.0386957	7.28422	3.23519e-13	0.0151473	50078	21407	19812
MI058	MI375	WM330	0.0442572	9.28168	2.3e-16	0.0172697	49925	21566	19738
MI058	MI375	WM340	0.0426102	9.04268	2.3e-16	0.0175827	49525	21777	19997
MI058	MI375	WM436	0.0383553	7.62612	2.42029e-14	0.0169357	49650	21617	20020
MI375	WM441	MI058	0.0254417	5.10511	3.30605e-07	0.0168292	30976	27307	25952
MI058	WM442	MI375	0.0301188	4.21663	2.47982e-05	0.0171498	47914	19820	18661
MI058	WM561	MI375	0.051076	7.5957	3.06422e-14	0.0324599	41767	22369	20195
MI058	WM562	MI375	0.0297288	6.03116	1.62788e-09	0.0198878	39592	23259	21916
WM563	MI375	MI058	0.0577859	11.8128	2.3e-16	0.0368812	23531	23028	20512
MI058	MI375	WM579	0.0124023	2.46234	0.0138033	0.00366848	66371	15020	14652
MI058	MI375	WM580	0.0154575	2.7278	0.00637588	0.00456466	66182	15011	14554
MI058	MI375	WM581	0.0179238	3.55996	0.000370906	0.00526447	66228	14993	14465
MI058	XJ160	MI375	0.0248609	4.46914	7.8536e-06	0.0141445	47971	19705	18749
MI058	MI377	MI605	0.022204	3.16583	0.00154639	0.0109784	35171	11233	10745
MI058	MI377	MI711	0.028381	7.19598	6.20171e-13	0.00900936	71219	16668	15748
MI058	MI377	MI722	0.0265609	4.69128	2.71495e-06	0.00872461	52780	11846	11233
MI894	MI377	MI058	0.00427885	0.684333	0.493765	0.00268511	30818	26874	26645
MI058	WM009	MI377	0.0327041	6.94556	3.76943e-12	0.0214413	44743	26067	24416
WM056	MI377	MI058	0.0222835	4.27863	1.88045e-05	0.0140766	35757	29269	27993
MI058	MI377	WM329	0.0561212	14.1384	2.3e-16	0.0221753	55117	24530	21923
MI058	MI377	WM330	0.0568952	16.9716	2.3e-16	0.0223929	55071	24567	21922
MI058	MI377	WM340	0.0580747	15.353	2.3e-16	0.0239757	54437	24687	21977
MI058	MI377	WM436	0.0512437	11.6666	2.3e-16	0.0227672	54662	24597	22199
MI377	WM441	MI058	0.0369486	8.45357	2.3e-16	0.0236917	36005	29973	27837
MI058	WM442	MI377	0.0473558	8.78088	2.3e-16	0.0262676	53536	22360	20338
MI058	WM561	MI377	0.0589972	8.8349	2.3e-16	0.0366744	46878	25112	22314
MI058	WM562	MI377	0.0398341	8.95314	2.3e-16	0.0259791	44382	26078	24080
WM563	MI377	MI058	0.0490735	9.60377	2.3e-16	0.0307815	27537	25108	22759
MI058	MI377	WM579	0.0265524	6.43883	1.20397e-10	0.0078614	73494	17069	16186
MI058	MI377	WM580	0.0298552	7.39135	1.45439e-13	0.00883408	73229	17075	16085
MI058	MI377	WM581	0.0316879	8.64289	2.3e-16	0.00932465	73355	17044	15997
MI058	XJ160	MI377	0.0312309	5.65567	1.55244e-08	0.0173034	53888	21991	20659
MI605	MI058	MI711	0.0560258	10.3767	2.3e-16	0.0264615	20751	14410	12881
MI605	MI058	MI722	0.0554705	8.00628	1.11022e-15	0.0273249	14436	9647	8633
MI058	MI894	MI605	0.00446193	0.6598	0.509382	0.0022174	33050	10468	10375
MI058	WM009	MI605	0.00156169	0.243003	0.808003	0.000664894	45421	9620	9590
MI058	WM056	MI605	0.0361516	5.96269	2.48117e-09	0.0194257	35175	12439	11571
MI605	WM329	MI058	0.192472	25.9044	2.3e-16	0.0815228	24359	18819	12744
MI605	WM330	MI058	0.189027	24.869	2.3e-16	0.0799871	24434	18789	12815
MI605	WM340	MI058	0.204722	30.8702	2.3e-16	0.0865956	24594	19031	12563
MI605	WM436	MI058	0.203864	26.5581	2.3e-16	0.0862672	24207	19006	12569
MI058	WM441	MI605	0.0197085	3.34225	0.000831023	0.0100452	37114	11719	11266
MI058	WM442	MI605	0.0224123	2.48339	0.013014	0.00824815	51052	8485	8113
MI058	WM561	MI605	0.0177258	2.81389	0.00489462	0.0071302	46739	9129	8811
MI058	WM562	MI605	0.0251704	3.25539	0.00113237	0.010657	45227	9775	9295
MI058	WM563	MI605	0.0318051	5.38784	7.13089e-08	0.0170278	27133	9700	9102
MI605	MI058	WM579	0.0521616	10.0858	2.3e-16	0.0230641	21793	14846	13374
MI605	MI058	WM580	0.0476765	8.78653	2.3e-16	0.0210991	21701	14756	13413
MI605	MI058	WM581	0.0488541	8.99345	2.3e-16	0.0215386	21761	14760	13385
MI058	XJ160	MI605	0.012709	1.67623	0.0936923	0.00463394	51075	8327	8118
MI722	MI711	MI058	0.0380202	3.54836	0.000387641	0.00421053	54934	6061	5617
MI058	MI894	MI711	0.016212	2.59969	0.00933075	0.00516229	67587	15702	15201
MI058	WM009	MI711	0.0117522	2.88702	0.00388908	0.00322212	90459	14334	14001
MI058	WM056	MI711	0.00407735	1.03365	0.301298	0.00136727	71545	17238	17098
MI058	WM329	MI711	0.0717641	12.8271	2.3e-16	0.033176	45169	25553	22131
MI058	WM330	MI711	0.0687245	9.84803	2.3e-16	0.0315875	45323	25379	22115
MI058	WM340	MI711	0.0183594	4.65735	3.20309e-06	0.00818617	46557	23463	22617
WM436	MI058	MI711	0.0256433	8.34075	2.3e-16	0.0111453	47099	23278	22114
MI058	WM441	MI711	0.0129653	2.55171	0.0107197	0.00420091	74787	16954	16520
MI058	WM442	MI711	0.0278937	6.04201	1.52204e-09	0.00653399	100976	12437	11762
MI058	WM561	MI711	0.0199764	2.9982	0.00271583	0.00513402	92971	13403	12878
MI058	WM562	MI711	0.0258716	3.74895	0.000177579	0.00702492	89975	14374	13649
WM563	MI058	MI711	0.0181438	3.53337	0.000410303	0.00618091	57721	14590	14070
WM579	MI711	MI058	0.0642008	7.69868	1.37668e-14	0.00661918	83502	8056	7084
WM580	MI711	MI058	0.0579032	6.64213	3.09177e-11	0.00590743	83512	7911	7045
WM581	MI711	MI058	0.0698836	8.42244	2.3e-16	0.00723493	83524	8137	7074
MI058	XJ160	MI711	0.0197344	2.56949	0.010185	0.00461717	101084	12324	11847
MI058	MI894	MI722	0.0166606	2.07625	0.0378706	0.00553767	50018	11228	10860
WM009	MI058	MI722	0.00489638	0.693267	0.488142	0.00138877	66869	10159	10060
WM056	MI058	MI722	0.00114388	0.20049	0.841097	0.000397186	53151	12253	12225
MI058	WM329	MI722	0.0602218	9.96012	2.3e-16	0.0288152	33846	18019	15972
MI058	WM330	MI722	0.0602949	8.77324	2.3e-16	0.0287886	34004	18016	15967
MI058	WM340	MI722	0.013532	2.25198	0.0243238	0.00625132	34819	16665	16220
WM436	MI058	MI722	0.030095	9.892	2.3e-16	0.0136198	35310	16806	15824
MI058	WM441	MI722	0.00271478	0.404066	0.686164	0.000913435	55596	12004	11939
MI058	WM442	MI722	0.0202307	4.24216	2.21378e-05	0.00490458	74641	8800	8451
MI058	WM561	MI722	0.0184307	2.11175	0.0347077	0.00485644	68701	9449	9107
MI058	WM562	MI722	0.025105	2.36694	0.0179357	0.00706207	66537	10249	9747
WM563	MI058	MI722	0.0269627	3.91164	9.16712e-05	0.00950218	42393	10360	9816
WM579	MI722	MI058	0.0215328	3.23306	0.00122471	0.00259504	57430	6618	6339
WM580	MI722	MI058	0.0132461	1.92256	0.0545349	0.00158434	57342	6502	6332
WM581	MI722	MI058	0.0259181	2.79648	0.00516631	0.00307747	57645	6551	6220
MI058	XJ160	MI722	0.0126245	1.55331	0.120348	0.00306386	74688	8743	8525
MI058	WM009	MI894	0.0284251	7.63642	2.24265e-14	0.0189239	42945	24693	23328
WM056	MI894	MI058	0.0170401	2.39718	0.016522	0.0110208	32985	28440	27487
MI058	MI894	WM329	0.0351478	5.93284	2.9774e-09	0.013817	52615	22810	21261
MI058	MI894	WM330	0.0412546	10.8218	2.3e-16	0.0161893	52504	23006	21183
MI058	MI894	WM340	0.0411461	8.94717	2.3e-16	0.0170822	52037	23292	21451
MI058	MI894	WM436	0.0339215	6.88217	5.89484e-12	0.0150745	52155	23058	21545
MI894	WM441	MI058	0.0391176	6.459	1.05396e-10	0.025663	33215	29393	27180
MI058	WM442	MI894	0.0381341	8.03482	8.88178e-16	0.021497	51418	21098	19548
MI058	WM561	MI894	0.0559395	10.3	2.3e-16	0.0352284	44882	23756	21239
MI058	WM562	MI894	0.0305666	6.08539	1.16207e-09	0.020292	42759	24646	23184
WM563	MI894	MI058	0.0436109	6.30575	2.86794e-10	0.0279349	25309	24289	22259
MI058	MI894	WM579	0.0131948	2.51672	0.0118453	0.00392179	69818	16087	15668
MI058	MI894	WM580	0.0132947	2.0846	0.0371052	0.0039588	69629	16082	15660
MI058	MI894	WM581	0.0155958	3.17054	0.00152154	0.00461282	69768	16052	15559
MI058	XJ160	MI894	0.0299277	7.17895	7.02549e-13	0.0168222	51610	20872	19659
MI058	WM009	WM056	0.0725265	17.3299	2.3e-16	0.040627	45852	28016	24227
MI058	WM009	WM329	0.062481	12.0965	2.3e-16	0.020678	72582	20916	18456
MI058	WM009	WM330	0.0671555	11.8452	2.3e-16	0.0222196	72541	21103	18447
MI058	WM009	WM340	0.0709374	15.0409	2.3e-16	0.0248029	71977	21415	18578
MI058	WM009	WM436	0.0490822	9.48482	2.3e-16	0.0183147	72298	20861	18909
MI058	WM009	WM441	0.0720896	18.2997	2.3e-16	0.0414529	43427	28903	25016
MI058	WM442	WM009	0.126353	24.689	2.3e-16	0.0886927	36933	30808	23896
MI058	WM561	WM009	0.0411056	6.39238	1.6332e-10	0.0314464	32795	30735	28308
WM562	WM009	MI058	9.99068e-05	0.0265856	0.97879	8.49931e-05	33809	30031	30025
MI058	WM009	WM563	0.0614683	19.3446	2.3e-16	0.0378979	38938	22216	19643
MI058	WM009	WM579	0.0571929	10.7802	2.3e-16	0.0146619	92335	15407	13740
MI058	WM009	WM580	0.0579029	10.9273	2.3e-16	0.01487	92147	15411	13724
MI058	WM009	WM581	0.0617692	12.3632	2.3e-16	0.0158008	92300	15436	13640
MI058	XJ160	WM009	0.0954626	18.4171	2.3e-16	0.0665255	37614	29744	24560
MI058	WM056	WM329	0.0950081	21.8082	2.3e-16	0.0401906	54565	27321	22580
MI058	WM056	WM330	0.0968193	22.6332	2.3e-16	0.0409035	54560	27449	22603
MI058	WM056	WM340	0.0976992	22.4973	2.3e-16	0.0436313	54097	27791	22844
MI058	WM056	WM436	0.0812264	19.4764	2.3e-16	0.0386104	54322	27155	23075
WM056	WM441	MI058	0.0581958	12.7133	2.3e-16	0.0371271	39237	30939	27536
MI058	WM442	WM056	0.0797923	17.6903	2.3e-16	0.0379119	54943	23912	20378
MI058	WM561	WM056	0.0892005	15.235	2.3e-16	0.0471583	48104	26601	22244
MI058	WM562	WM056	0.078806	16.203	2.3e-16	0.0442443	45683	28207	24086
WM563	WM056	MI058	0.0265527	5.65873	1.52502e-08	0.0166647	30839	24627	23353
MI058	WM056	WM579	0.0344245	8.01187	1.11022e-15	0.0108469	73333	18360	17138
MI058	WM056	WM580	0.0356217	6.6632	2.67926e-11	0.0112459	73153	18374	17110
MI058	WM056	WM581	0.0381623	7.47246	7.86038e-14	0.0119753	73255	18349	17000
MI058	XJ160	WM056	0.0653166	13.2442	2.3e-16	0.0308608	55122	23462	20585
WM329	WM330	MI058	0.00289989	0.413726	0.679074	0.000906793	75286	19540	19427
WM329	WM340	MI058	0.0186358	3.54733	0.000389158	0.00656322	66039	22356	21538
WM329	WM436	MI058	0.0159782	3.70792	0.000208966	0.00627123	59027	24830	24049
MI058	WM441	WM329	0.0774522	16.4269	2.3e-16	0.031054	57722	25687	21994
MI058	WM442	WM329	0.0774305	17.2855	2.3e-16	0.0219132	82620	18131	15525
MI058	WM561	WM329	0.0618526	8.89765	2.3e-16	0.0191062	75148	19322	17071
MI058	WM562	WM329	0.0619116	11.7497	2.3e-16	0.0203717	72372	20754	18334
MI058	WM563	WM329	0.0815681	18.0611	2.3e-16	0.0349691	44222	22568	19164
MI058	WM329	WM579	0.10221	19.2276	2.3e-16	0.0443032	46397	27105	22078
MI058	WM329	WM580	0.102838	18.1225	2.3e-16	0.0445192	46203	27030	21989
MI058	WM329	WM581	0.102263	18.1745	2.3e-16	0.0441459	46366	26990	21982
MI058	XJ160	WM329	0.0556201	11.2057	2.3e-16	0.0156983	82977	17717	15850
WM330	WM340	MI058	0.0159528	4.58842	4.46617e-06	0.00565099	65961	22449	21744
WM330	WM436	MI058	0.0136645	3.09865	0.00194404	0.00537471	59159	24851	24181
MI058	WM441	WM330	0.0768261	14.971	2.3e-16	0.030616	57650	25636	21978
MI058	WM442	WM330	0.0776011	18.174	2.3e-16	0.0218073	82610	18094	15488
MI058	WM561	WM330	0.0675236	12.6492	2.3e-16	0.0208516	75132	19517	17048
MI058	WM562	WM330	0.062037	12.9576	2.3e-16	0.0204162	72446	20860	18423
MI058	WM563	WM330	0.0790174	17.3787	2.3e-16	0.0337884	44155	22511	19214
MI058	WM330	WM579	0.0980624	15.6773	2.3e-16	0.0422491	46577	26891	22088
MI058	WM330	WM580	0.0994219	16.3529	2.3e-16	0.0429064	46416	26910	22043
MI058	WM330	WM581	0.101447	16.2863	2.3e-16	0.043598	46499	26899	21944
MI058	XJ160	WM330	0.0591387	11.7892	2.3e-16	0.0166291	82933	17793	15806
WM436	WM340	MI058	0.000706244	0.191576	0.848075	0.000274185	59983	24088	24054
MI058	WM441	WM340	0.0844825	16.5808	2.3e-16	0.0356824	57064	26187	22107
MI058	WM442	WM340	0.0875792	18.9181	2.3e-16	0.0260976	81965	18528	15544
MI058	WM561	WM340	0.0645457	13.5073	2.3e-16	0.0210993	74704	19709	17319
MI058	WM562	WM340	0.0669538	12.0678	2.3e-16	0.0231389	71743	21059	18416
MI058	WM563	WM340	0.0909091	19.5486	2.3e-16	0.0407714	43627	22908	19090
MI058	WM340	WM579	0.0551789	12.4777	2.3e-16	0.0231235	47702	25137	22508
MI058	WM340	WM580	0.0537526	12.0897	2.3e-16	0.0225572	47614	25083	22524
MI058	WM340	WM581	0.052277	10.2519	2.3e-16	0.0218457	47768	24990	22507
MI058	XJ160	WM340	0.06827	18.2972	2.3e-16	0.0203086	82283	18167	15845
MI058	WM441	WM436	0.0602983	14.0927	2.3e-16	0.0273573	57698	25629	22714
MI058	WM442	WM436	0.0695225	12.797	2.3e-16	0.0221788	82214	18176	15813
MI058	WM561	WM436	0.0506397	9.65341	2.3e-16	0.0177769	74948	19461	17585
MI058	WM562	WM436	0.0589154	11.1594	2.3e-16	0.0219744	72021	21020	18681
MI058	WM563	WM436	0.0762279	16.9816	2.3e-16	0.0367833	43868	22625	19420
WM436	MI058	WM579	0.00953363	3.35329	0.000798576	0.00389286	48636	23508	23064
WM436	MI058	WM580	0.00515929	1.8437	0.0652267	0.00211266	48394	23379	23139
WM436	MI058	WM581	0.00574206	1.66277	0.0963589	0.00234529	48576	23383	23116
MI058	XJ160	WM436	0.0531668	9.7438	2.3e-16	0.016977	82525	17917	16108
MI058	WM442	WM441	0.0813558	21.4888	2.3e-16	0.0397956	52504	24789	21059
MI058	WM561	WM441	0.224247	46.0403	2.3e-16	0.130653	43674	33122	20988
MI058	WM562	WM441	0.072467	21.1953	2.3e-16	0.0418371	43456	28992	25074
WM563	WM441	MI058	0.0842135	18.0742	2.3e-16	0.0537423	30285	26689	22543
MI058	WM441	WM579	0.0535745	10.2775	2.3e-16	0.0163117	76524	18230	16376
MI058	WM441	WM580	0.052714	8.66099	2.3e-16	0.0160302	76333	18153	16335
MI058	WM441	WM581	0.0552653	10.0121	2.3e-16	0.0167576	76483	18178	16274
MI058	XJ160	WM441	0.0588235	16.7158	2.3e-16	0.0285726	52869	24102	21424
MI058	WM442	WM561	0.113045	20.1232	2.3e-16	0.0825397	33020	30764	24515
MI058	WM442	WM562	0.11355	24.2622	2.3e-16	0.0798317	37175	30332	24146
MI058	WM442	WM563	0.0688268	11.499	2.3e-16	0.0360548	46433	19000	16553
MI058	WM442	WM579	0.0835322	20.5458	2.3e-16	0.0184781	103116	13620	11520
MI058	WM442	WM580	0.0852992	23.4299	2.3e-16	0.0188453	102872	13595	11458
MI058	WM442	WM581	0.0835066	24.3889	2.3e-16	0.0183783	103118	13546	11458
XJ160	WM442	MI058	0	0	1	0	37314	24255	24255
MI058	WM561	WM562	0.0442708	8.01478	1.11022e-15	0.0340877	32721	30877	28259
MI058	WM561	WM563	0.0966694	14.8804	2.3e-16	0.0565808	40518	21600	17792
MI058	WM561	WM579	0.0531101	8.10308	4.44089e-16	0.0127739	95117	14247	12810
MI058	WM561	WM580	0.0568768	7.33339	2.24487e-13	0.0136585	94851	14243	12710
MI058	WM561	WM581	0.0503121	8.51785	2.3e-16	0.0120387	95151	14133	12779
MI058	XJ160	WM561	0.0948797	14.8011	2.3e-16	0.0692725	33466	30257	25013
MI058	WM562	WM563	0.0732328	12.3924	2.3e-16	0.044974	38665	22349	19299
MI058	WM562	WM579	0.0605366	8.92581	2.3e-16	0.0153441	92011	15259	13517
MI058	WM562	WM580	0.0656039	8.54648	2.3e-16	0.0167087	91808	15374	13481
MI058	WM562	WM581	0.064012	8.89042	2.3e-16	0.0162006	92009	15284	13445
MI058	XJ160	WM562	0.103135	18.2751	2.3e-16	0.0720084	37290	29842	24262
MI058	WM563	WM579	0.000674127	0.149468	0.881184	0.000217379	59400	14844	14824
MI058	WM563	WM580	0.000610625	0.144406	0.88518	0.000196021	59201	14748	14730
MI058	WM563	WM581	0.00203528	0.442087	0.658426	0.000652479	59399	14770	14710
MI058	XJ160	WM563	0.0650255	9.94146	2.3e-16	0.0338613	46571	18819	16521
WM579	WM580	MI058	0.00606061	0.748655	0.454065	0.000603626	89118	7470	7380
WM581	WM579	MI058	0.00469164	0.544191	0.58631	0.00046212	89503	7388	7319
MI058	XJ160	WM579	0.0572458	9.80508	2.3e-16	0.0125834	103397	13205	11775
WM581	WM580	MI058	0.0104146	0.989431	0.322452	0.0010526	88646	7616	7459
MI058	XJ160	WM580	0.0610167	10.4482	2.3e-16	0.0134223	103154	13233	11711
MI058	XJ160	WM581	0.0615973	10.4487	2.3e-16	0.0134752	103344	13193	11662
MI1081	MI096	MI2950	0.0309795	3.19062	0.0014197	0.016133	20840	9884	9290
MI1081	MI096	MI3071	0.0248471	2.8133	0.00490364	0.0100339	25722	6785	6456
MI1081	MI096	MI3076	0.0357831	5.94331	2.7933e-09	0.0275681	21777	16123	15009
MI375	MI096	MI1081	0.0182156	2.87884	0.00399136	0.0131859	20100	13695	13205
MI377	MI096	MI1081	0.0130207	1.58482	0.113008	0.00955959	22846	15638	15236
MI1081	MI096	MI605	0.00951249	1.07023	0.284514	0.00518072	17039	6792	6664
MI1081	MI096	MI711	0.0451803	6.89313	5.45786e-12	0.0157926	37368	11000	10049
MI1081	MI096	MI722	0.0454987	5.38805	7.12279e-08	0.0165757	26546	7537	6881
MI894	MI096	MI1081	0.0177958	2.08504	0.0370657	0.0129802	21396	14813	14295
MI096	WM009	MI1081	0.0198288	4.36916	1.24727e-05	0.0147452	25472	16021	15398
WM056	MI096	MI1081	0.0118889	1.58449	0.113081	0.00907046	23913	16299	15916
MI1081	MI096	WM329	0.0489826	7.63039	2.33147e-14	0.0208955	28699	15826	14348
MI1081	MI096	WM330	0.0475245	7.45375	9.08162e-14	0.0202825	28660	15826	14390
MI1081	MI096	WM340	0.0437508	9.82451	2.3e-16	0.0198899	28346	15984	14644
MI1081	MI096	WM436	0.0564882	7.97866	1.55431e-15	0.0269206	28676	16047	14331
MI096	WM441	MI1081	0.0196091	3.41977	0.000626742	0.014966	24740	16431	15799
MI096	WM442	MI1081	0.0297414	5.13159	2.87299e-07	0.0221165	25777	16169	15235
MI096	WM561	MI1081	0.0381275	8.05315	8.88178e-16	0.0285988	24902	16255	15061
MI096	WM562	MI1081	0.0284256	4.00409	6.22557e-05	0.0211243	25416	16118	15227
WM563	MI096	MI1081	0.058623	10.9442	2.3e-16	0.0433127	18347	13661	12148
MI1081	MI096	WM579	0.0398008	6.51699	7.17324e-11	0.0129319	38752	11273	10410
MI1081	MI096	WM580	0.0394943	6.57303	4.93021e-11	0.0128867	38636	11265	10409
MI1081	MI096	WM581	0.0423171	7.63603	2.24265e-14	0.0138416	38808	11318	10399
MI096	XJ160	MI1081	0.0378754	7.78285	7.10543e-15	0.0283732	25584	16414	15216
MI2950	MI096	MI3071	0.0221448	2.94554	0.00322392	0.0114934	14209	7039	6734
MI3076	MI096	MI2950	0.0615591	9.46719	2.3e-16	0.0337306	21450	13080	11563
MI096	MI375	MI2950	0.00556628	0.699373	0.484319	0.00256504	25676	8852	8754
MI096	MI377	MI2950	0.025636	2.5481	0.010831	0.0118626	29481	10382	9863
MI605	MI2950	MI096	0.13556	14.1519	2.3e-16	0.0517355	11397	6580	5009
MI2950	MI096	MI711	0.0478686	7.46482	8.34888e-14	0.0215152	20621	11799	10721
MI2950	MI096	MI722	0.0525622	5.92746	3.07656e-09	0.024617	14533	7980	7183
MI096	MI894	MI2950	0.0032763	0.351618	0.725125	0.00152587	27632	9646	9583
WM009	MI096	MI2950	0.0205637	2.83405	0.00459624	0.00939963	32428	10447	10026
MI096	WM056	MI2950	0.0263682	2.80045	0.00510309	0.0129633	30235	11074	10505
MI2950	WM329	MI096	0.0923628	11.4979	2.3e-16	0.040848	24764	13867	11522
MI2950	WM330	MI096	0.0963079	14.8287	2.3e-16	0.0428241	24870	14030	11565
MI2950	WM340	MI096	0.112702	14.679	2.3e-16	0.0495127	24717	14069	11219
MI2950	WM436	MI096	0.104805	13.7886	2.3e-16	0.0466851	24683	14152	11467
MI096	WM441	MI2950	0.0115171	1.35417	0.175682	0.00547951	31536	10671	10428
WM442	MI096	MI2950	0.0116382	1.66433	0.0960461	0.00529445	32649	10257	10021
WM561	MI096	MI2950	0.00565639	0.674852	0.49977	0.00261715	31936	10223	10108
WM562	MI096	MI2950	0.00893295	1.06915	0.285001	0.00409117	32247	10278	10096
MI096	WM563	MI2950	0.0119406	1.24136	0.214472	0.00590867	23117	8729	8523
MI2950	MI096	WM579	0.0406917	5.59005	2.27e-08	0.0170475	21639	12097	11151
MI2950	MI096	WM580	0.0417529	6.24849	4.14433e-10	0.0175162	21558	12076	11108
MI2950	MI096	WM581	0.0434407	7.19684	6.16174e-13	0.0182065	21661	12082	11076
XJ160	MI096	MI2950	0.00763957	1.04605	0.295539	0.00350546	32500	10288	10132
MI3076	MI096	MI3071	0.0193693	2.6243	0.00868274	0.00836948	27310	8631	8303
MI375	MI096	MI3071	0.0181604	2.3669	0.0179379	0.00637431	30982	6055	5839
MI377	MI096	MI3071	0.00343348	0.429189	0.667786	0.00122945	35617	7014	6966
MI605	MI096	MI3071	0.0295694	3.20862	0.00133373	0.0163184	9849	5954	5612
MI3071	MI711	MI096	0.136414	12.3633	2.3e-16	0.0236556	29291	6173	4691
MI3071	MI722	MI096	0.111753	10.7113	2.3e-16	0.0191392	20071	4039	3227
MI894	MI096	MI3071	0.0182408	2.08242	0.037304	0.00643017	33339	6587	6351
WM009	MI096	MI3071	0.0188465	2.07399	0.0380799	0.00667051	38697	7190	6924
WM056	MI096	MI3071	0.0331381	3.31445	0.00091823	0.0121308	36649	7498	7017
MI096	WM329	MI3071	0.0349466	4.62036	3.83071e-06	0.0181459	23119	10617	9900
MI096	WM330	MI3071	0.0375532	4.27253	1.93269e-05	0.019594	23140	10720	9944
WM340	MI096	MI3071	0.0100575	1.41385	0.157407	0.00504949	23748	10093	9892
WM436	MI096	MI3071	0.0297834	4.88407	1.03918e-06	0.0147886	23764	10269	9675
WM441	MI096	MI3071	0.0200792	2.44024	0.0146774	0.0072471	37825	7341	7052
WM442	MI096	MI3071	0.00258435	0.29024	0.771632	0.000908334	38724	6983	6947
WM561	MI096	MI3071	0.00324605	0.437847	0.661497	0.00115166	37826	6954	6909
WM562	MI096	MI3071	0.0141025	1.41546	0.156933	0.00500642	38546	7155	6956
WM563	MI096	MI3071	0.0412604	4.58839	4.46678e-06	0.0154629	27610	5981	5507
MI3071	WM579	MI096	0.0933953	10.8104	2.3e-16	0.0169709	30737	6357	5271
MI3071	WM580	MI096	0.104183	13.0531	2.3e-16	0.018984	30705	6428	5215
MI3071	WM581	MI096	0.0945392	8.95473	2.3e-16	0.0173182	30873	6414	5306
XJ160	MI096	MI3071	0.0123352	1.68876	0.0912649	0.00437593	38651	7140	6966
MI375	MI096	MI3076	0.0118973	1.90385	0.0569298	0.00829413	28150	14544	14202
MI096	MI377	MI3076	0.00103937	0.168961	0.865827	0.000736553	31505	16373	16339
MI3076	MI096	MI605	0.0280155	3.8035	0.000142665	0.0159339	17788	8770	8292
MI3076	MI096	MI711	0.0388073	5.5336	3.1373e-08	0.0146004	38614	13866	12830
MI3076	MI096	MI722	0.0413715	4.72853	2.26156e-06	0.0160961	28121	9628	8863
MI894	MI096	MI3076	0.0088622	1.22637	0.220059	0.00618501	29624	15539	15266
MI096	WM009	MI3076	0.0257644	4.97712	6.45367e-07	0.0183174	35002	17060	16203
WM056	MI096	MI3076	0.00792114	1.27873	0.200991	0.00579002	32826	17178	16908
MI3076	MI096	WM329	0.0751604	11.9544	2.3e-16	0.0338051	29061	20363	17516
MI3076	MI096	WM330	0.0776033	14.318	2.3e-16	0.0351018	29182	20593	17627
MI3076	MI096	WM340	0.0814653	16.3079	2.3e-16	0.0388922	28832	20842	17702
MI3076	MI096	WM436	0.0845891	20.3622	2.3e-16	0.0425066	29102	20765	17526
MI096	WM441	MI3076	0.0194834	4.64217	3.44768e-06	0.01418	34105	17346	16683
MI096	WM442	MI3076	0.0388533	6.80855	9.859e-12	0.0276471	35268	17286	15993
MI096	WM561	MI3076	0.0316854	6.63053	3.34477e-11	0.0227661	34437	17143	16090
MI096	WM562	MI3076	0.0270808	6.89878	5.24514e-12	0.0192427	34966	17048	16149
WM563	MI096	MI3076	0.0477469	7.30781	2.71561e-13	0.0338347	25629	14439	13123
MI3076	MI096	WM579	0.0344425	5.01051	5.42854e-07	0.0120294	40004	14161	13218
MI3076	MI096	WM580	0.0310046	4.48161	7.40825e-06	0.0108815	39837	14116	13267
MI3076	MI096	WM581	0.0328861	5.48009	4.251e-08	0.0115628	39979	14165	13263
MI096	XJ160	MI3076	0.0348068	6.27054	3.59792e-10	0.024868	35142	17288	16125
MI377	MI375	MI096	0.00442177	0.833248	0.404705	0.00331858	18547	17718	17562
MI375	MI096	MI605	0.00210902	0.190518	0.848903	0.0010163	20842	6177	6151
MI375	MI096	MI711	0.00944824	1.28331	0.199385	0.00290899	45280	9669	9488
MI375	MI096	MI722	0.0154472	1.51378	0.130081	0.004956	32611	6738	6533
MI894	MI375	MI096	0.0182556	2.63067	0.00852167	0.0112309	21800	14056	13552
WM009	MI096	MI375	0.0150118	3.13718	0.0017058	0.0115623	21086	18222	17683
MI375	WM056	MI096	0.00287045	0.624271	0.53245	0.00225609	19504	18517	18411
MI096	MI375	WM329	0.00499371	0.732589	0.463809	0.00191376	35466	13987	13848
MI096	MI375	WM330	0.0114306	1.65104	0.0987295	0.00436825	35385	14069	13751
MI096	MI375	WM340	0.00276989	0.404377	0.685936	0.00112617	35090	14119	14041
MI096	MI375	WM436	0.00485818	0.848757	0.396017	0.00209414	35265	14065	13929
MI375	WM441	MI096	0.0428431	12.5455	2.3e-16	0.0340087	19958	19631	18018
WM442	MI096	MI375	0.0163524	2.85637	0.00428517	0.0126064	21535	18273	17685
MI096	WM561	MI375	0.00509978	1.14148	0.253671	0.0040365	20647	18132	17948
WM562	MI096	MI375	0.0157123	4.26294	2.01757e-05	0.0121349	21108	18262	17697
MI096	MI375	WM563	0.0143324	2.37437	0.0175791	0.0106031	15628	14756	14339
MI375	MI096	WM579	0.0107364	1.34365	0.179062	0.0030734	46825	9979	9767
MI375	MI096	WM580	0.0115478	1.48969	0.136307	0.00331323	46724	9986	9758
MI375	MI096	WM581	0.0128342	1.63993	0.101019	0.0036808	46806	9983	9730
XJ160	MI096	MI375	0.0165621	3.03041	0.0024422	0.0128403	21453	18383	17784
MI096	MI377	MI605	0.0118472	1.08749	0.276822	0.0057031	24062	7217	7048
MI377	MI096	MI711	0.000276141	0.0354367	0.971731	8.52903e-05	50920	10867	10861
MI377	MI096	MI722	0.00684211	0.743607	0.457114	0.00220059	36850	7652	7548
MI894	MI377	MI096	0.00506444	0.653969	0.513132	0.00374822	19963	18754	18565
WM009	MI096	MI377	0.0185482	3.29893	0.000970541	0.0141187	24104	20620	19869
MI377	WM056	MI096	0.00909823	2.25376	0.0242114	0.00704491	22802	20685	20312
MI096	MI377	WM329	0.0199044	3.18243	0.00146046	0.00768329	39686	16115	15486
MI096	MI377	WM330	0.0190934	2.89055	0.00384566	0.00736424	39651	16119	15515
MI096	MI377	WM340	0.0115714	2.42791	0.0151862	0.00472629	39281	16129	15760
MI096	MI377	WM436	0.0162314	2.49394	0.0126333	0.00707431	39553	16247	15728
MI377	WM441	MI096	0.0502721	9.42775	2.3e-16	0.0390514	23396	21811	19723
WM442	MI096	MI377	0.0122401	2.0851	0.0370601	0.00935516	24402	20468	19973
MI096	WM561	MI377	0	0	1	0	23481	20340	20340
WM562	MI096	MI377	0.0132939	2.49186	0.0127077	0.0101875	24015	20542	20003
MI096	MI377	WM563	0.032907	5.9057	3.51155e-09	0.0245624	17293	17201	16105
MI096	MI377	WM579	0.00192488	0.215551	0.829338	0.000552188	52617	11191	11148
MI096	MI377	WM580	0.00102674	0.127783	0.898321	0.000296445	52493	11212	11189
MI096	MI377	WM581	0.00278426	0.348325	0.727596	0.000799402	52528	11165	11103
XJ160	MI096	MI377	0.0189989	3.30026	0.000965953	0.014514	24343	20703	19931
MI605	MI096	MI711	0.0737043	11.758	2.3e-16	0.0345072	13792	9571	8257
MI605	MI096	MI722	0.0718374	8.90833	2.3e-16	0.0353659	9368	6274	5433
MI894	MI096	MI605	0.000981206	0.0925954	0.926225	0.000467575	22369	6631	6618
WM009	MI096	MI605	0.019775	2.74365	0.00607603	0.00930982	26491	7297	7014
MI096	WM056	MI605	0.0154803	1.78262	0.0746487	0.00785657	24748	7675	7441
MI605	WM329	MI096	0.202964	23.0692	2.3e-16	0.0936938	16045	12663	8390
MI605	WM330	MI096	0.201042	26.1331	2.3e-16	0.0928311	16067	12683	8437
MI605	WM340	MI096	0.21845	24.2726	2.3e-16	0.100442	16074	12812	8218
MI605	WM436	MI096	0.208678	25.0384	2.3e-16	0.0960032	15914	12702	8316
MI096	WM441	MI605	0.00279776	0.350603	0.725886	0.00139572	25777	7527	7485
MI096	WM442	MI605	0.0112533	1.54355	0.122698	0.00531756	26477	7189	7029
MI096	WM561	MI605	0.00279799	0.30621	0.759444	0.00134644	25872	7168	7128
MI096	WM562	MI605	0.0069512	0.77606	0.437714	0.00332579	26234	7243	7143
MI096	WM563	MI605	0.0203156	2.43912	0.0147231	0.010473	18491	6077	5835
MI605	MI096	WM579	0.0620176	9.30031	2.3e-16	0.0272101	14431	9838	8689
MI605	MI096	WM580	0.066113	9.5186	2.3e-16	0.0290143	14433	9885	8659
MI605	MI096	WM581	0.0667099	10.938	2.3e-16	0.0292412	14425	9874	8639
MI096	XJ160	MI605	0.00430735	0.543994	0.586446	0.00205987	26466	7228	7166
MI722	MI711	MI096	0.0316975	2.42303	0.0153919	0.00391629	36757	4215	3956
MI894	MI096	MI711	0.0162696	2.19523	0.0281474	0.00502971	48019	10494	10158
WM009	MI096	MI711	0.0135759	1.89829	0.0576578	0.00419264	55287	11199	10899
WM056	MI096	MI711	0.026873	3.40729	0.00065612	0.00861451	52402	11712	11099
MI096	WM329	MI711	0.0555266	7.72453	1.13243e-14	0.0255007	31910	17232	15419
MI096	WM330	MI711	0.0509648	5.94924	2.69391e-09	0.0233554	32165	17157	15493
WM340	MI096	MI711	0.00294836	0.399315	0.689661	0.00130362	33090	15818	15725
WM436	MI096	MI711	0.0414209	9.31246	2.3e-16	0.017918	33194	16330	15031
WM441	MI096	MI711	0.0157361	2.05369	0.0400058	0.00494593	54109	11425	11071
WM442	MI096	MI711	0.000914244	0.106724	0.915008	0.000280741	55470	10948	10928
WM561	MI096	MI711	0.0105205	1.66835	0.0952471	0.00324303	54337	10998	10769
WM562	MI096	MI711	0.00893183	1.23398	0.217212	0.00274721	55117	11070	10874
WM563	MI096	MI711	0.0419882	6.07567	1.23472e-09	0.0137163	41035	9790	9001
WM579	MI711	MI096	0.0611193	5.41698	6.06127e-08	0.00702646	57351	5764	5100
WM580	MI711	MI096	0.0532753	5.11205	3.18673e-07	0.00609795	57337	5684	5109
WM581	MI711	MI096	0.0591586	4.74086	2.12814e-06	0.00681712	57278	5765	5121
XJ160	MI096	MI711	0.00493146	0.5474	0.584104	0.00152796	55410	11106	10997
MI894	MI096	MI722	0.0188888	2.00688	0.044763	0.00611888	34758	7363	7090
WM009	MI096	MI722	0.0393996	4.99387	5.91805e-07	0.012573	40126	8033	7424
WM056	MI096	MI722	0.0391688	3.314	0.000919705	0.0129767	38035	8251	7629
MI096	WM329	MI722	0.0421652	4.36802	1.25376e-05	0.020018	23377	11802	10847
MI096	WM330	MI722	0.0401823	3.8545	0.000115967	0.0191749	23617	11869	10952
WM340	MI096	MI722	0.0137423	1.33629	0.181456	0.00627546	24242	11139	10837
WM436	MI096	MI722	0.0510633	7.36721	1.74305e-13	0.0231203	24374	11640	10509
WM441	MI096	MI722	0.029741	3.10762	0.00188598	0.00963371	39266	8050	7585
WM442	MI096	MI722	0.0158939	1.92493	0.0542385	0.00503632	40258	7734	7492
WM561	MI096	MI722	0.0206614	2.31702	0.0205028	0.00658171	39484	7731	7418
WM562	MI096	MI722	0.0164169	1.97124	0.0486962	0.00524891	39937	7801	7549
WM563	MI096	MI722	0.0568347	6.69172	2.20557e-11	0.0194655	29536	6908	6165
WM579	MI722	MI096	0.0208426	2.00667	0.0447848	0.00278304	38435	4604	4416
WM580	MI722	MI096	0.00773283	0.942111	0.346136	0.00102451	38289	4496	4427
WM581	MI722	MI096	0.0157842	1.39131	0.164132	0.0020892	38456	4537	4396
XJ160	MI096	MI722	0.0227819	2.07022	0.0384321	0.00728927	40162	7879	7528
WM009	MI096	MI894	0.0123437	3.15408	0.00161006	0.009509	22873	19314	18843
MI894	WM056	MI096	0.0168426	2.58647	0.00969656	0.0130224	20841	19893	19234
MI096	MI894	WM329	0.00819535	1.1028	0.270115	0.00315356	37507	15070	14825
MI096	MI894	WM330	0.00816163	1.16062	0.245798	0.00313403	37463	15070	14826
MI894	MI096	WM340	0.000993641	0.135355	0.892331	0.000405077	37106	15111	15081
MI096	MI894	WM436	0.00172608	0.318767	0.749903	0.000747277	37329	15089	15037
MI894	WM441	MI096	0.0544297	10.7564	2.3e-16	0.0428753	21601	21203	19014
WM442	MI096	MI894	0.0133977	2.8653	0.00416619	0.0103122	23292	19326	18815
MI096	WM561	MI894	0.0103302	1.77868	0.0752918	0.00818152	22256	19414	19017
WM562	MI096	MI894	0.014934	2.87815	0.00400019	0.0115226	22931	19403	18832
MI096	MI894	WM563	0.00896057	1.2524	0.210425	0.00662596	16401	15764	15484
MI894	MI096	WM579	0.0147876	2.23714	0.0252771	0.00424473	49655	10774	10460
MI894	MI096	WM580	0.0166289	2.44226	0.0145958	0.0047721	49523	10760	10408
MI894	MI096	WM581	0.017592	3.13016	0.00174712	0.00503983	49636	10759	10387
XJ160	MI096	MI894	0.0122755	1.88513	0.0594121	0.00951285	23164	19420	18949
WM009	MI096	WM056	0.00848656	1.61946	0.105348	0.0057241	24434	21390	21030
MI096	WM009	WM329	0.0209075	4.1735	2.99962e-05	0.00793259	43408	16065	15407
MI096	WM009	WM330	0.0214951	3.35137	0.000804123	0.00810944	43295	16015	15341
MI096	WM009	WM340	0.0228945	4.22764	2.36154e-05	0.00920459	42874	16263	15535
MI096	WM009	WM436	0.0126598	2.89435	0.00379944	0.0053958	43311	16038	15637
MI096	WM009	WM441	0.00773079	1.31097	0.189867	0.00533978	23215	22160	21820
WM009	WM442	MI096	0.0134324	2.18839	0.0286416	0.00949467	31928	18145	17664
WM561	WM009	MI096	0.006657	1.12465	0.260735	0.00492132	29541	18751	18503
WM009	WM562	MI096	0.000161777	0.0278783	0.977759	0.000118537	30515	18547	18541
WM009	MI096	WM563	0.0047422	0.782783	0.433754	0.00346227	20766	16632	16475
MI096	WM009	WM579	0.0362708	4.62624	3.72363e-06	0.0104448	56492	11771	10947
MI096	WM009	WM580	0.0337571	5.249	1.52928e-07	0.00979444	56415	11790	11020
MI096	WM009	WM581	0.03509	4.99519	5.87779e-07	0.0101434	56474	11755	10958
WM009	XJ160	MI096	0.00527567	0.790708	0.429114	0.00380986	31403	18388	18195
MI096	WM056	WM329	0.0638591	8.32149	2.3e-16	0.0259475	40309	17759	15627
MI096	WM056	WM330	0.0658486	9.51331	2.3e-16	0.0268704	40327	17894	15683
MI096	WM056	WM340	0.0595693	8.65234	2.3e-16	0.0256816	39907	17885	15874
MI096	WM056	WM436	0.0531578	9.43403	2.3e-16	0.0244148	40368	17801	16004
WM056	WM441	MI096	0.0390564	8.20936	2.3e-16	0.0311795	25156	22068	20409
WM442	MI096	WM056	0.018218	2.72588	0.00641299	0.0121697	25023	21518	20748
MI096	WM561	WM056	0.000329629	0.0562165	0.955169	0.000226281	23988	21243	21229
WM562	MI096	WM056	0.00473019	0.871701	0.383371	0.00320861	24357	21347	21146
WM563	WM056	MI096	0.0489692	13.1855	2.3e-16	0.0371882	19216	17758	16100
MI096	WM056	WM579	0.0126024	1.38185	0.167018	0.0038015	53705	11932	11635
MI096	WM056	WM580	0.010125	1.22797	0.219458	0.00307076	53619	11922	11683
MI096	WM056	WM581	0.00966675	1.14968	0.250275	0.00292905	53718	11907	11679
XJ160	MI096	WM056	0.0213478	2.97728	0.00290816	0.0142889	24885	21673	20767
WM329	WM330	MI096	0.00376484	0.629618	0.528944	0.00132391	52222	13864	13760
WM329	WM340	MI096	0.023458	4.13216	3.59373e-05	0.00934318	45530	16012	15278
WM329	WM436	MI096	0.0107074	1.79413	0.0727921	0.00472666	40891	17510	17139
MI096	WM441	WM329	0.0498402	6.51648	7.19758e-11	0.0195643	42064	17083	15461
MI096	WM442	WM329	0.0289878	4.22037	2.43903e-05	0.0108912	43572	16027	15124
MI096	WM561	WM329	0.0219127	3.22104	0.00127726	0.00836279	42763	15996	15310
MI096	WM562	WM329	0.0255387	3.91626	8.99333e-05	0.00973171	43342	16183	15377
MI096	WM563	WM329	0.0508059	7.55263	4.26326e-14	0.0210789	31661	14571	13162
MI096	WM329	WM579	0.090807	12.9597	2.3e-16	0.0390391	32818	18457	15384
MI096	WM329	WM580	0.0916252	12.4734	2.3e-16	0.0394432	32652	18431	15337
MI096	WM329	WM581	0.0872893	14.2607	2.3e-16	0.0375226	32787	18323	15381
MI096	XJ160	WM329	0.0186617	3.287	0.0010126	0.00704319	43528	15939	15355
WM330	WM340	MI096	0.0197697	3.05694	0.00223607	0.0078591	45259	15939	15321
WM330	WM436	MI096	0.0075616	1.1339	0.256837	0.00334746	40915	17522	17259
MI096	WM441	WM330	0.0437717	6.94991	3.6553e-12	0.0171804	42148	17014	15587
MI096	WM442	WM330	0.026475	3.87074	0.000108503	0.00995402	43625	16032	15205
MI096	WM561	WM330	0.0233421	3.98991	6.60992e-05	0.00887657	42682	16002	15272
MI096	WM562	WM330	0.0166041	2.69037	0.00713719	0.00628999	43385	15980	15458
MI096	WM563	WM330	0.051259	6.52676	6.72091e-11	0.0212502	31695	14592	13169
MI096	WM330	WM579	0.0880516	11.0634	2.3e-16	0.0377126	32993	18381	15406
MI096	WM330	WM580	0.0843673	10.3198	2.3e-16	0.0362431	32932	18309	15460
MI096	WM330	WM581	0.0844108	11.4359	2.3e-16	0.0363134	33027	18326	15473
MI096	XJ160	WM330	0.0141356	2.49054	0.0127548	0.00534457	43611	15927	15483
WM436	WM340	MI096	0.0107508	1.79226	0.0730911	0.00469957	41254	17299	16931
MI096	WM441	WM340	0.0446026	7.02158	2.1938e-12	0.0186328	41710	17249	15776
MI096	WM442	WM340	0.0262451	3.72093	0.000198494	0.0105122	43223	16247	15416
MI096	WM561	WM340	0.0173608	2.75846	0.00580751	0.00701705	42329	16086	15537
MI096	WM562	WM340	0.0179942	3.06312	0.0021904	0.00724344	42923	16180	15608
MI096	WM563	WM340	0.0543104	7.7334	1.04361e-14	0.0239243	31330	14841	13312
MI096	WM340	WM579	0.0368987	5.33112	9.76079e-08	0.0152752	33924	16931	15726
MI096	WM340	WM580	0.033974	4.57315	4.80455e-06	0.0141207	33867	16891	15781
MI096	WM340	WM581	0.0324687	4.69518	2.66377e-06	0.0134153	33871	16758	15704
MI096	XJ160	WM340	0.0166881	3.51313	0.000442855	0.00671718	43163	16175	15644
MI096	WM441	WM436	0.0307294	5.20242	1.96715e-07	0.0135834	42192	16922	15913
MI096	WM442	WM436	0.024769	5.12918	2.91012e-07	0.0106087	43654	16301	15513
MI096	WM561	WM436	0.0204198	4.40365	1.06443e-05	0.00880069	42623	16166	15519
MI096	WM562	WM436	0.0231917	4.54529	5.48586e-06	0.00997143	43221	16324	15584
MI096	WM563	WM436	0.0466588	7.74383	9.54792e-15	0.0217809	31560	14637	13332
WM436	MI096	WM579	0.0240297	5.39462	6.86703e-08	0.00976008	34373	16556	15779
WM436	MI096	WM580	0.0211449	4.15455	3.25933e-05	0.00862015	34189	16492	15809
WM436	MI096	WM581	0.0242193	5.11212	3.18568e-07	0.00985004	34303	16514	15733
MI096	XJ160	WM436	0.0148316	3.217	0.00129538	0.00635357	43520	16148	15676
MI096	WM442	WM441	0.00668273	1.23452	0.217009	0.00461901	23726	22144	21850
WM441	WM561	MI096	0.0268609	5.27482	1.32888e-07	0.0215614	26322	21217	20107
MI096	WM562	WM441	0.0103929	1.71799	0.0857987	0.00725025	23346	22409	21948
WM563	WM441	MI096	0.0844857	15.2642	2.3e-16	0.065537	19268	18940	15989
MI096	WM441	WM579	0.0361394	4.74487	2.08639e-06	0.0106649	55351	12056	11215
MI096	WM441	WM580	0.0316197	3.9267	8.61177e-05	0.00935364	55253	11990	11255
MI096	WM441	WM581	0.0314916	4.59022	4.42784e-06	0.00928331	55312	11939	11210
XJ160	MI096	WM441	0.00875561	1.59009	0.111813	0.00602984	23814	22236	21850
WM561	WM442	MI096	0.0215734	4.48078	7.43691e-06	0.0144907	33681	17284	16554
WM562	WM442	MI096	0.0131231	2.50248	0.0123326	0.00940842	31711	18374	17898
WM442	MI096	WM563	0.00912938	1.54372	0.122656	0.00664218	21083	16691	16389
MI096	WM442	WM579	0.0506591	6.41657	1.39378e-10	0.0145701	56772	11915	10766
MI096	WM442	WM580	0.0483294	6.39414	1.61452e-10	0.0139345	56635	11876	10781
MI096	WM442	WM581	0.0422997	5.92919	3.04441e-09	0.0121597	56784	11766	10811
XJ160	WM442	MI096	0.0106073	1.61356	0.106623	0.00584819	41612	14053	13758
WM561	WM562	MI096	0.00682979	1.49293	0.135456	0.00504659	29850	18722	18468
MI096	WM561	WM563	0.021553	5.04834	4.45654e-07	0.0160912	20183	17063	16343
MI096	WM561	WM579	0.0228485	3.64405	0.000268386	0.00659448	55771	11505	10991
MI096	WM561	WM580	0.0233923	3.44498	0.0005711	0.00677259	55650	11506	10980
MI096	WM561	WM581	0.0158136	2.36232	0.0181608	0.00457362	55795	11402	11047
WM561	XJ160	MI096	0.0121341	3.08069	0.00206525	0.00824034	33466	17308	16893
MI096	WM562	WM563	0.00716207	1.35253	0.176206	0.00525056	20592	16664	16427
MI096	WM562	WM579	0.0301556	4.0464	5.20105e-05	0.00865823	56449	11649	10967
MI096	WM562	WM580	0.0310248	4.41344	1.01739e-05	0.00899317	56369	11731	11025
MI096	WM562	WM581	0.0264088	3.4246	0.00061571	0.0076222	56476	11621	11023
WM562	XJ160	MI096	0.00498142	0.889716	0.373618	0.00357828	31583	18258	18077
WM563	MI096	WM579	0.0206918	2.74075	0.00612985	0.00636016	42229	9915	9513
WM563	MI096	WM580	0.0225835	2.81393	0.004894	0.00696019	42185	9939	9500
WM563	MI096	WM581	0.0223258	3.28255	0.00102872	0.00683747	42199	9868	9437
XJ160	MI096	WM563	0.00599199	0.857698	0.391059	0.00438674	20989	16705	16506
WM579	WM580	MI096	0.00832702	1.10308	0.269991	0.000915656	61647	5328	5240
WM579	WM581	MI096	0.00249808	0.249952	0.802624	0.000270225	61619	5217	5191
MI096	XJ160	WM579	0.0294492	3.26749	0.00108505	0.00851048	56777	11728	11057
WM581	WM580	MI096	0.00572179	0.58538	0.558292	0.000635	61074	5361	5300
MI096	XJ160	WM580	0.0282634	3.41807	0.000630661	0.0082084	56655	11733	11088
MI096	XJ160	WM581	0.0256545	3.43199	0.000599171	0.0074491	56799	11694	11109
MI1081	MI2950	MI3071	0.0023	0.366124	0.714273	0.00118563	24448	11984	11929
MI3076	MI1081	MI2950	0.0285786	4.47789	7.53833e-06	0.015805	33815	20515	19375
MI1081	MI375	MI2950	0.0358534	5.13008	2.89623e-07	0.0188374	35242	17147	15960
MI1081	MI377	MI2950	0.0475962	9.4717	2.3e-16	0.0250442	40146	19633	17849
MI605	MI2950	MI1081	0.116046	19.0324	2.3e-16	0.0511214	20192	11257	8916
MI2950	MI1081	MI711	0.0141349	2.47279	0.0134062	0.00633627	33706	18690	18169
MI2950	MI1081	MI722	0.0173319	2.65446	0.00794353	0.00799767	24306	12884	12445
MI1081	MI894	MI2950	0.0346116	4.9247	8.44887e-07	0.0180979	37959	18279	17056
MI1081	WM009	MI2950	0.0142742	2.0033	0.0451448	0.00760746	43021	19505	18956
MI1081	WM056	MI2950	0.0523956	8.40989	2.3e-16	0.0290917	41194	20889	18809
MI2950	WM329	MI1081	0.0794414	10.9218	2.3e-16	0.0406709	40726	21992	18755
MI2950	WM330	MI1081	0.0856568	14.0265	2.3e-16	0.0437546	40915	22117	18627
MI2950	WM340	MI1081	0.101573	15.0546	2.3e-16	0.0514122	41020	22238	18137
MI2950	WM436	MI1081	0.0875965	15.6438	2.3e-16	0.0442752	40638	21908	18379
MI1081	WM441	MI2950	0.0387509	6.6053	3.96707e-11	0.0209171	42852	20225	18716
MI1081	WM442	MI2950	0.0194236	2.77666	0.00549211	0.0103131	43242	19524	18780
MI1081	WM561	MI2950	0.027017	4.04997	5.12234e-05	0.0142395	42778	19311	18295
MI1081	WM562	MI2950	0.0225062	3.02341	0.00249943	0.0118777	42799	19445	18589
MI1081	WM563	MI2950	0.0370834	5.50989	3.59064e-08	0.0206168	31880	16584	15398
MI2950	MI1081	WM579	0.0101957	1.97469	0.0483038	0.00423915	35128	19073	18688
MI2950	MI1081	WM580	0.00820303	1.49109	0.135939	0.00341297	35070	18989	18680
MI2950	MI1081	WM581	0.0130104	2.06008	0.0393912	0.00541799	35159	19115	18624
MI1081	XJ160	MI2950	0.0194449	2.83564	0.00457342	0.0103134	43271	19503	18759
MI1081	MI3076	MI3071	0.0104968	2.09452	0.0362134	0.00453952	44288	14392	14093
MI1081	MI375	MI3071	0.0174965	2.35511	0.018517	0.00693426	45017	11689	11287
MI1081	MI377	MI3071	0.0308384	7.1244	1.04539e-12	0.0121862	51156	13421	12618
MI605	MI1081	MI3071	0.00448649	0.639962	0.522197	0.00242975	17819	10299	10207
MI3071	MI711	MI1081	0.125	15.4489	2.3e-16	0.0246851	50142	10143	7889
MI3071	MI722	MI1081	0.102424	15.095	2.3e-16	0.0199247	35415	6867	5591
MI1081	MI894	MI3071	0.0237971	3.07511	0.00210428	0.00948103	48370	12713	12122
MI1081	WM009	MI3071	0.0123484	2.20858	0.0272039	0.00503707	54153	13814	13477
MI1081	WM056	MI3071	0.0103763	2.36273	0.0181408	0.00428848	52454	13827	13543
MI1081	WM329	MI3071	0.0592077	8.74077	2.3e-16	0.0309621	37471	18489	16422
MI1081	WM330	MI3071	0.0614512	8.50201	2.3e-16	0.0319143	37729	18439	16304
MI1081	WM340	MI3071	0.0196505	4.08235	4.45829e-05	0.0099849	38702	17331	16663
WM436	MI1081	MI3071	0.00677054	1.5868	0.112558	0.00341439	38430	17026	16797
MI1081	WM441	MI3071	0.0158241	2.68898	0.00716707	0.00644515	53895	13834	13403
MI1081	WM442	MI3071	0.021764	3.26562	0.00109224	0.00880669	54243	13826	13237
MI1081	WM561	MI3071	0.031217	5.97218	2.34098e-09	0.0125363	53661	13676	12848
MI1081	WM562	MI3071	0.0223633	3.60782	0.000308782	0.00907335	54101	13852	13246
MI1081	WM563	MI3071	0.000817884	0.12019	0.904333	0.000345602	40154	11013	10995
MI3071	WM579	MI1081	0.0844231	11.0229	2.3e-16	0.0173468	52409	10366	8752
MI3071	WM580	MI1081	0.0905688	14.4244	2.3e-16	0.0187417	52390	10488	8746
MI3071	WM581	MI1081	0.0896236	10.9617	2.3e-16	0.0185289	52570	10480	8756
MI1081	XJ160	MI3071	0.02195	3.98563	6.7302e-05	0.00889773	54282	13851	13256
MI1081	MI375	MI3076	0.0330168	6.80492	1.01104e-11	0.025641	35473	26704	24997
MI1081	MI377	MI3076	0.0401669	7.73255	1.04361e-14	0.0311333	39580	29910	27600
MI3076	MI1081	MI605	0.0260031	4.2367	2.26825e-05	0.0151282	29106	15112	14346
MI1081	MI3076	MI711	0.00374142	1.02687	0.304481	0.00140804	59731	21194	21036
MI3076	MI1081	MI722	0.00146014	0.287193	0.773965	0.000568652	44698	15089	15045
MI1081	MI894	MI3076	0.0304736	4.69003	2.7316e-06	0.0237036	37685	28371	26693
MI1081	WM009	MI3076	0.0622142	11.5837	2.3e-16	0.0498043	42479	31936	28195
MI1081	WM056	MI3076	0.0360265	7.78216	7.10543e-15	0.0292088	41188	31288	29112
MI3076	MI1081	WM329	0.0339048	6.98591	2.83018e-12	0.0154647	44531	30845	28822
MI3076	MI1081	WM330	0.0376173	8.85046	2.3e-16	0.0171187	44401	31059	28807
MI3076	MI1081	WM340	0.0429485	8.59259	2.3e-16	0.020545	43787	31411	28824
MI3076	MI1081	WM436	0.0376277	7.65444	1.93179e-14	0.0190141	44385	31037	28786
MI1081	WM441	MI3076	0.0588878	13.3329	2.3e-16	0.0473444	42557	31962	28407
MI1081	WM442	MI3076	0.0713846	12.6724	2.3e-16	0.0571113	42694	32186	27897
MI1081	WM561	MI3076	0.0700337	15.7594	2.3e-16	0.0555869	42404	31589	27454
MI1081	WM562	MI3076	0.062409	14.384	2.3e-16	0.0496975	42640	31740	28011
WM563	MI1081	MI3076	0.00048352	0.113337	0.909764	0.000392195	32572	24830	24806
MI1081	MI3076	WM579	0.0036196	0.971852	0.331124	0.00126907	61775	21766	21609
MI1081	MI3076	WM580	0.00594041	1.56496	0.117592	0.00208536	61537	21760	21503
MI1081	MI3076	WM581	0.00413787	1.02667	0.304575	0.00145127	61694	21719	21540
MI1081	XJ160	MI3076	0.0685636	11.4453	2.3e-16	0.0546847	42834	31996	27890
MI375	MI377	MI1081	0.00651015	1.37477	0.169204	0.00462782	38799	24737	24417
MI1081	MI375	MI605	0.0100748	1.79141	0.0732274	0.00551664	29763	12081	11840
MI1081	MI375	MI711	0.0380903	6.22858	4.70668e-10	0.0131097	61558	17960	16642
MI1081	MI375	MI722	0.0274023	4.02252	5.75791e-05	0.00984338	45514	12654	11979
MI894	MI375	MI1081	0.00347006	0.645051	0.518894	0.00203033	43861	19375	19241
MI375	WM009	MI1081	0.0405685	10.6937	2.3e-16	0.0313883	38437	28189	25991
MI375	WM056	MI1081	0.00640333	1.47955	0.138993	0.00478069	40860	26090	25758
MI1081	MI375	WM329	0.0502802	8.92257	2.3e-16	0.0217386	46564	26330	23809
MI1081	MI375	WM330	0.0523767	8.82236	2.3e-16	0.0226703	46399	26512	23873
MI1081	MI375	WM340	0.045937	8.34404	2.3e-16	0.0210241	45868	26560	24227
MI1081	MI375	WM436	0.0576101	11.915	2.3e-16	0.0278845	46283	26711	23801
MI375	WM441	MI1081	0.0408179	8.46863	2.3e-16	0.0304567	41466	27182	25050
MI375	WM442	MI1081	0.0502916	9.98877	2.3e-16	0.0391725	38242	28632	25890
MI375	WM561	MI1081	0.0591356	16.8287	2.3e-16	0.0453359	38478	28146	25003
MI375	WM562	MI1081	0.0471245	9.24521	2.3e-16	0.0363259	38187	28231	25690
WM563	MI375	MI1081	0.0371508	8.35334	2.3e-16	0.0268981	31417	21957	20384
MI1081	MI375	WM579	0.0304206	6.23226	4.59758e-10	0.00975575	63744	18325	17243
MI1081	MI375	WM580	0.0309307	5.47778	4.30683e-08	0.00994804	63587	18315	17216
MI1081	MI375	WM581	0.030911	5.27261	1.34495e-07	0.00994341	63653	18343	17243
MI375	XJ160	MI1081	0.0529652	13.5216	2.3e-16	0.0413035	38171	28737	25846
MI1081	MI377	MI605	0.0155124	2.30034	0.0214292	0.0084581	34251	13813	13391
MI1081	MI377	MI711	0.046837	13.6425	2.3e-16	0.0160608	69186	20205	18397
MI1081	MI377	MI722	0.0405869	6.00353	1.93079e-09	0.0144527	51554	14396	13273
MI894	MI377	MI1081	0.00718676	1.39206	0.163903	0.00507359	41116	26137	25764
MI377	WM009	MI1081	0.036147	8.41501	2.3e-16	0.0283573	42446	31560	29358
MI377	WM056	MI1081	0.00171485	0.391775	0.695224	0.00127235	46720	28623	28525
MI1081	MI377	WM329	0.0663815	18.4843	2.3e-16	0.028807	52047	29920	26195
MI1081	MI377	WM330	0.0645494	21.854	2.3e-16	0.0279646	51859	29933	26303
MI1081	MI377	WM340	0.0600239	15.5569	2.3e-16	0.0275568	51322	30128	26716
MI1081	MI377	WM436	0.0703715	19.078	2.3e-16	0.0339854	51715	30124	26163
MI377	WM441	MI1081	0.0359215	6.04932	1.45454e-09	0.0263961	47558	29545	27496
MI377	WM442	MI1081	0.0445761	7.42311	1.14353e-13	0.0348893	42529	31729	29021
MI377	WM561	MI1081	0.0495016	10.6386	2.3e-16	0.0385111	42740	31378	28418
MI377	WM562	MI1081	0.0416371	7.0839	1.40155e-12	0.0325093	42476	31534	29013
WM563	MI377	MI1081	0.0422794	9.96735	2.3e-16	0.0302035	36211	24381	22403
MI1081	MI377	WM579	0.0425661	12.0746	2.3e-16	0.0136046	71447	20672	18984
MI1081	MI377	WM580	0.0430458	10.2565	2.3e-16	0.0137914	71264	20657	18952
MI1081	MI377	WM581	0.0426264	11.645	2.3e-16	0.0136113	71310	20595	18911
MI377	XJ160	MI1081	0.0465242	9.47095	2.3e-16	0.0365574	42027	31908	29071
MI605	MI1081	MI711	0.0331691	6.46924	9.84979e-11	0.0154488	23922	15621	14618
MI605	MI1081	MI722	0.0406096	5.39542	6.83619e-08	0.019593	16626	10583	9757
MI1081	MI894	MI605	0.00688162	0.944849	0.344736	0.00377695	32252	13022	12844
WM009	MI1081	MI605	0.000883611	0.114744	0.908648	0.000493194	36666	14159	14134
MI1081	WM056	MI605	0.0273108	5.08523	3.67176e-07	0.0158711	35241	14971	14175
MI605	WM329	MI1081	0.174231	25.7543	2.3e-16	0.0925732	27280	20569	14465
MI605	WM330	MI1081	0.17548	22.5095	2.3e-16	0.0932984	27331	20652	14486
MI605	WM340	MI1081	0.19098	26.3163	2.3e-16	0.1011	27391	20835	14153
MI605	WM436	MI1081	0.178448	32.2984	2.3e-16	0.094051	27164	20505	14295
MI1081	WM441	MI605	0.0148364	2.80107	0.00509331	0.00835275	36493	14467	14044
MI1081	WM442	MI605	0.00806166	1.10232	0.270323	0.00450237	36738	14255	14027
MI1081	WM561	MI605	0.00859144	1.13681	0.255618	0.00475572	36174	13970	13732
MI1081	WM562	MI605	0.0129972	1.95036	0.0511328	0.00723392	36532	14263	13897
MI1081	WM563	MI605	0.0260324	4.0302	5.57285e-05	0.0151454	26627	11765	11168
MI605	MI1081	WM579	0.0297625	5.60963	2.02761e-08	0.0129332	25030	16106	15175
MI605	MI1081	WM580	0.0299539	5.37646	7.59638e-08	0.0130451	24940	16092	15156
MI605	MI1081	WM581	0.0317786	6.24321	4.28694e-10	0.0137985	25009	16104	15112
MI1081	XJ160	MI605	0.00943798	1.22027	0.222363	0.00525225	36792	14225	13959
MI722	MI711	MI1081	0.0279812	3.40899	0.000652029	0.00388922	60908	6668	6305
MI1081	MI894	MI711	0.0399849	6.96084	3.38263e-12	0.013835	65677	19260	17779
MI1081	WM009	MI711	0.0332197	7.48748	7.01661e-14	0.011716	73095	20761	19426
MI1081	WM056	MI711	0.0262161	7.30144	2.84661e-13	0.00944132	70905	20864	19798
MI1081	WM329	MI711	0.0902015	13.4122	2.3e-16	0.041574	49456	28572	23844
MI1081	WM330	MI711	0.0881986	12.2647	2.3e-16	0.0403472	49764	28359	23762
MI1081	WM340	MI711	0.0356909	8.65274	2.3e-16	0.0157887	51272	26102	24303
WM436	MI1081	MI711	0.0066571	2.18626	0.0287964	0.00292482	51161	25253	24919
MI1081	WM441	MI711	0.0366547	8.10204	4.44089e-16	0.0129674	72890	20886	19409
MI1081	WM442	MI711	0.0402868	7.05289	1.75238e-12	0.0141094	73274	20748	19141
MI1081	WM561	MI711	0.0409872	8.02689	1.11022e-15	0.0142934	72702	20458	18847
MI1081	WM562	MI711	0.0409216	9.28024	2.3e-16	0.0143003	72959	20693	19066
MI1081	WM563	MI711	0.00915908	2.17381	0.0297191	0.00335694	56270	17023	16714
WM579	MI711	MI1081	0.0549529	6.08222	1.1853e-09	0.0071131	92267	8850	7928
WM580	MI711	MI1081	0.0495634	6.42562	1.31332e-10	0.00635983	92337	8714	7891
WM581	MI711	MI1081	0.0530578	6.46474	1.01475e-10	0.00687558	92190	8842	7951
MI1081	XJ160	MI711	0.0380211	6.99491	2.65432e-12	0.0132922	73450	20667	19153
MI1081	MI894	MI722	0.0361418	6.3635	1.97201e-10	0.0129694	48867	13675	12721
MI1081	WM009	MI722	0.014914	2.35831	0.0183582	0.0054488	54616	14597	14168
MI1081	WM056	MI722	0.0183846	3.08633	0.0020264	0.00685002	52999	14790	14256
MI1081	WM329	MI722	0.0753903	9.38304	2.3e-16	0.0358279	37036	20077	17262
MI1081	WM330	MI722	0.0768323	9.17944	2.3e-16	0.0364052	37284	20084	17218
MI1081	WM340	MI722	0.0294003	4.69975	2.6048e-06	0.0134641	38300	18557	17497
WM436	MI1081	MI722	0.0158439	3.6162	0.000298963	0.00719424	38375	18273	17703
MI1081	WM441	MI722	0.0252667	4.43265	9.30802e-06	0.00923808	54388	14750	14023
MI1081	WM442	MI722	0.0309069	4.99688	5.82639e-07	0.0112322	54795	14743	13859
MI1081	WM561	MI722	0.0358589	4.88991	1.00881e-06	0.0128577	54255	14458	13457
MI1081	WM562	MI722	0.0336851	6.33108	2.43444e-10	0.0122634	54512	14791	13827
MI1081	WM563	MI722	0.000125791	0.0185143	0.985229	4.80084e-05	41496	11926	11923
WM579	MI722	MI1081	0.0184393	2.64326	0.0082113	0.00276313	63524	7263	7000
WM580	MI722	MI1081	0.00720339	1.17434	0.24026	0.0010744	63426	7131	7029
WM581	MI722	MI1081	0.0152392	1.49304	0.135427	0.00227029	63811	7195	6979
MI1081	XJ160	MI722	0.0279764	3.89455	9.83809e-05	0.0101404	54836	14661	13863
MI894	WM009	MI1081	0.043136	10.625	2.3e-16	0.033718	40229	30349	27839
MI894	WM056	MI1081	0.00799971	1.4158	0.156834	0.00597092	43250	27784	27343
MI1081	MI894	WM329	0.0511832	8.88638	2.3e-16	0.0221732	49603	28075	25341
MI1081	MI894	WM330	0.0530878	10.5906	2.3e-16	0.0230719	49431	28307	25453
MI1081	MI894	WM340	0.0459942	8.51529	2.3e-16	0.0210948	48863	28325	25834
MI1081	MI894	WM436	0.0562474	9.51619	2.3e-16	0.0270842	49153	28243	25235
MI894	WM441	MI1081	0.0415077	7.47844	7.52731e-14	0.030841	43979	28793	26498
MI894	WM442	MI1081	0.0506088	8.79077	2.3e-16	0.0396038	40346	30589	27642
MI894	WM561	MI1081	0.0570236	12.133	2.3e-16	0.0437461	40519	29881	26657
MI894	WM562	MI1081	0.0476388	8.27934	2.3e-16	0.0370261	40133	30271	27518
WM563	MI894	MI1081	0.0371915	5.41566	6.10623e-08	0.0271679	33528	23621	21927
MI1081	MI894	WM579	0.0348562	7.16864	7.57394e-13	0.0112244	67921	19684	18358
MI1081	MI894	WM580	0.0338492	5.61603	1.954e-08	0.0109239	67767	19639	18353
MI1081	MI894	WM581	0.0323276	5.90333	3.56244e-09	0.0104352	67940	19639	18409
MI894	XJ160	MI1081	0.0540067	9.38621	2.3e-16	0.042281	40187	30699	27553
WM056	WM009	MI1081	0.0331044	8.43662	2.3e-16	0.0267194	44671	32487	30405
MI1081	WM009	WM329	0.0651641	13.4905	2.3e-16	0.0286299	55273	30624	26877
MI1081	WM009	WM330	0.0648725	14.2521	2.3e-16	0.0284766	55051	30704	26963
MI1081	WM009	WM340	0.0647625	12.6267	2.3e-16	0.0301141	54371	31016	27243
MI1081	WM009	WM436	0.0651152	13.8168	2.3e-16	0.0319326	55117	30801	27035
WM441	WM009	MI1081	0.00237005	0.489982	0.624147	0.0019078	46861	30874	30728
WM009	WM442	MI1081	0.0103072	2.26411	0.023567	0.00665096	63986	24897	24389
WM009	WM561	MI1081	0.0157519	4.88276	1.04611e-06	0.0106451	59598	25955	25150
WM009	WM562	MI1081	0.00654957	1.30697	0.191221	0.00436326	61392	25588	25255
WM563	WM009	MI1081	0.0757015	17.4213	2.3e-16	0.0592012	35745	27908	23980
MI1081	WM009	WM579	0.066101	13.1996	2.3e-16	0.0218296	74749	22112	19370
MI1081	WM009	WM580	0.0659955	12.9723	2.3e-16	0.0218937	74621	22129	19389
MI1081	WM009	WM581	0.0669434	11.8561	2.3e-16	0.0221475	74672	22106	19332
WM009	XJ160	MI1081	0.0131298	3.23399	0.00122073	0.00862859	62606	25425	24766
MI1081	WM056	WM329	0.101232	24.5264	2.3e-16	0.0465383	52817	32847	26808
MI1081	WM056	WM330	0.102538	25.965	2.3e-16	0.0472965	52711	33107	26949
MI1081	WM056	WM340	0.0977185	29.6293	2.3e-16	0.0476271	52090	33223	27308
MI1081	WM056	WM436	0.0975383	27.3543	2.3e-16	0.0501557	52836	32992	27128
WM056	WM441	MI1081	0.0338417	6.88022	5.97611e-12	0.0253813	50785	30198	28221
WM056	WM442	MI1081	0.0415346	7.23402	4.68958e-13	0.0336376	44227	32850	30230
WM056	WM561	MI1081	0.0469777	10.8566	2.3e-16	0.0376233	44399	32338	29436
WM056	WM562	MI1081	0.0388081	6.19531	5.8172e-10	0.0311637	44718	32456	30031
WM563	WM056	MI1081	0.0458616	10.954	2.3e-16	0.0333814	39830	25051	22854
MI1081	WM056	WM579	0.0531778	12.7835	2.3e-16	0.0179456	72661	22122	19888
MI1081	WM056	WM580	0.0521436	11.9517	2.3e-16	0.0175956	72461	22014	19832
MI1081	WM056	WM581	0.0497694	12.949	2.3e-16	0.0167781	72617	21968	19885
WM056	XJ160	MI1081	0.0430275	10.396	2.3e-16	0.0350672	43742	33101	30370
WM329	WM330	MI1081	0.00841406	1.54097	0.123325	0.00341212	82740	21393	21036
WM329	WM340	MI1081	0.027596	5.77519	7.68648e-09	0.012576	72494	24502	23186
WM329	WM436	MI1081	0.00642268	1.27442	0.202515	0.00323262	65033	26482	26144
MI1081	WM441	WM329	0.089487	20.8389	2.3e-16	0.0398759	54777	31758	26541
MI1081	WM442	WM329	0.0685837	15.6441	2.3e-16	0.0299702	55492	30546	26625
MI1081	WM561	WM329	0.0648656	13.6733	2.3e-16	0.0282795	55341	30075	26411
MI1081	WM562	WM329	0.0671855	18.7207	2.3e-16	0.0293285	55297	30442	26609
MI1081	WM563	WM329	0.0897666	16.6893	2.3e-16	0.0416336	41898	27054	22597
MI1081	WM329	WM579	0.118508	20.8166	2.3e-16	0.0511773	50721	30278	23862
MI1081	WM329	WM580	0.117898	18.8394	2.3e-16	0.0509306	50534	30162	23800
MI1081	WM329	WM581	0.114581	17.5895	2.3e-16	0.0493061	50632	29980	23816
MI1081	XJ160	WM329	0.0586605	16.4791	2.3e-16	0.0255601	55865	30175	26831
WM330	WM340	MI1081	0.0200603	5.60672	2.06193e-08	0.0092356	72291	24535	23570
WM436	WM330	MI1081	0.000319543	0.0592385	0.952762	0.00016281	65305	26609	26592
MI1081	WM441	WM330	0.0840981	25.7337	2.3e-16	0.037611	54846	31834	26895
MI1081	WM442	WM330	0.0653467	13.795	2.3e-16	0.0285988	55442	30617	26861
MI1081	WM561	WM330	0.0643308	14.5926	2.3e-16	0.0279736	55095	30103	26464
MI1081	WM562	WM330	0.0623268	14.7826	2.3e-16	0.027089	55108	30288	26734
MI1081	WM563	WM330	0.0884053	21.0644	2.3e-16	0.04104	41757	27110	22706
MI1081	WM330	WM579	0.117296	17.5138	2.3e-16	0.0502627	51039	30067	23754
MI1081	WM330	WM580	0.115209	17.5847	2.3e-16	0.0494802	50938	29969	23777
MI1081	WM330	WM581	0.115649	17.3745	2.3e-16	0.0495121	50953	29910	23709
MI1081	XJ160	WM330	0.0549965	14.8517	2.3e-16	0.023972	55778	30194	27046
WM436	WM340	MI1081	0.0186982	4.03059	5.56376e-05	0.00931769	66057	26505	25532
MI1081	WM441	WM340	0.0841736	18.2446	2.3e-16	0.0398537	54139	32149	27157
MI1081	WM442	WM340	0.0666184	12.4985	2.3e-16	0.0308278	54671	30909	27048
MI1081	WM561	WM340	0.0596159	13.4066	2.3e-16	0.0273932	54506	30207	26808
MI1081	WM562	WM340	0.0617588	14.459	2.3e-16	0.0284684	54482	30619	27057
MI1081	WM563	WM340	0.0904754	19.6118	2.3e-16	0.0444202	41179	27432	22880
MI1081	WM340	WM579	0.0707071	16.6538	2.3e-16	0.0293134	52444	27878	24196
MI1081	WM340	WM580	0.0688541	12.6894	2.3e-16	0.028607	52327	27787	24207
MI1081	WM340	WM581	0.0659667	12.7089	2.3e-16	0.0272896	52402	27616	24198
MI1081	XJ160	WM340	0.0568091	12.7394	2.3e-16	0.026175	54986	30490	27212
MI1081	WM441	WM436	0.0818596	26.8456	2.3e-16	0.0408291	54932	31811	26997
MI1081	WM442	WM436	0.0732282	16.4573	2.3e-16	0.0358709	55329	30990	26761
MI1081	WM561	WM436	0.0707977	16.0625	2.3e-16	0.034458	55035	30431	26407
MI1081	WM562	WM436	0.0722398	18.3889	2.3e-16	0.0353162	55092	30873	26713
MI1081	WM563	WM436	0.0937374	22.5767	2.3e-16	0.048326	41553	27175	22517
MI1081	WM436	WM579	0.00811874	2.6497	0.00805627	0.00333827	52833	26014	25595
MI1081	WM436	WM580	0.00980886	3.05642	0.00223995	0.00404638	52644	26046	25540
MI1081	WM436	WM581	0.00736967	1.92296	0.0544853	0.00302827	52715	25903	25524
MI1081	XJ160	WM436	0.0640473	17.3834	2.3e-16	0.0312468	55640	30602	26918
WM441	WM442	MI1081	0.0107017	2.2534	0.0242339	0.00861449	46576	31119	30460
WM441	WM561	MI1081	0.0169889	3.55879	0.000372561	0.0126206	52859	28614	27658
WM441	WM562	MI1081	0.00769331	1.19898	0.230537	0.00617534	46728	30912	30440
WM563	WM441	MI1081	0.0781777	12.7458	2.3e-16	0.0576706	39825	26376	22551
MI1081	WM441	WM579	0.072486	14.9484	2.3e-16	0.0240593	74537	22349	19328
MI1081	WM441	WM580	0.0693775	13.3146	2.3e-16	0.0230212	74380	22196	19316
MI1081	WM441	WM581	0.068904	13.4332	2.3e-16	0.0228273	74477	22168	19310
WM441	XJ160	MI1081	0.0127738	2.49772	0.0124995	0.0104589	45786	31714	30914
WM442	WM561	MI1081	0.00617577	1.28035	0.200421	0.00380947	66163	23298	23012
WM562	WM442	MI1081	0.00349889	0.608512	0.542848	0.00229086	63303	24952	24778
WM563	WM442	MI1081	0.0826238	17.0419	2.3e-16	0.0648152	35615	28165	23866
MI1081	WM442	WM579	0.0756936	16.7926	2.3e-16	0.0249685	75004	22276	19141
MI1081	WM442	WM580	0.0746658	14.987	2.3e-16	0.0246926	74847	22230	19141
MI1081	WM442	WM581	0.0707051	13.3869	2.3e-16	0.0233073	74993	22094	19176
WM442	XJ160	MI1081	0.00355872	0.578956	0.562619	0.00180682	79515	19317	19180
WM562	WM561	MI1081	0.00929134	1.89637	0.0579115	0.0062771	59677	25636	25164
WM563	WM561	MI1081	0.089332	20.5843	2.3e-16	0.0686011	36231	27504	22993
MI1081	WM561	WM579	0.0621654	11.8779	2.3e-16	0.0201833	74537	21426	18918
MI1081	WM561	WM580	0.0628034	11.5871	2.3e-16	0.0204865	74414	21458	18922
MI1081	WM561	WM581	0.0577023	11.3842	2.3e-16	0.0187627	74582	21309	18984
XJ160	WM561	MI1081	0.00340483	0.954361	0.339901	0.00213524	65494	23576	23416
WM563	WM562	MI1081	0.0850561	16.2659	2.3e-16	0.0657472	35784	27791	23434
MI1081	WM562	WM579	0.0653737	14.3046	2.3e-16	0.0213926	74804	21862	19179
MI1081	WM562	WM580	0.0676666	15.5788	2.3e-16	0.0222372	74621	21924	19145
MI1081	WM562	WM581	0.0656681	16.126	2.3e-16	0.0215227	74743	21843	19151
WM562	XJ160	MI1081	0.00632427	1.20613	0.227767	0.0041349	62837	24982	24668
MI1081	WM563	WM579	0.0247853	5.52337	3.32551e-08	0.00852245	57895	17903	17037
MI1081	WM563	WM580	0.0224123	4.5637	5.02606e-06	0.00771328	57804	17814	17033
MI1081	WM563	WM581	0.021736	4.60219	4.18081e-06	0.0074562	57910	17745	16990
WM563	XJ160	MI1081	0.0859473	25.6232	2.3e-16	0.0673905	35441	28233	23764
WM579	WM580	MI1081	0.00624886	0.730322	0.465193	0.000782378	98627	8293	8190
WM579	WM581	MI1081	0.00231905	0.223327	0.823281	0.000288375	98858	8212	8174
MI1081	XJ160	WM579	0.0613699	13.5365	2.3e-16	0.0201679	75375	21895	19363
WM581	WM580	MI1081	0.00373539	0.415293	0.677927	0.000471092	97894	8330	8268
MI1081	XJ160	WM580	0.0624301	12.8243	2.3e-16	0.0205287	75141	21851	19283
MI1081	XJ160	WM581	0.0601804	12.7259	2.3e-16	0.0197128	75244	21739	19271
MI2950	MI3076	MI3071	0.0100462	1.91109	0.0559934	0.00519694	28011	14327	14042
MI2950	MI375	MI3071	0.019915	2.86891	0.00411883	0.00999143	25765	12240	11762
MI2950	MI377	MI3071	0.0281122	4.65765	3.19846e-06	0.0140819	29728	14135	13362
MI605	MI2950	MI3071	0.0153257	1.77973	0.0751204	0.00620977	21423	6360	6168
MI3071	MI711	MI2950	0.103807	12.2441	2.3e-16	0.0220314	41917	8278	6721
MI3071	MI722	MI2950	0.0790826	8.49912	2.3e-16	0.0164942	29208	5458	4658
MI2950	MI894	MI3071	0.0249904	3.64385	0.000268589	0.0126039	27773	13371	12719
MI2950	WM009	MI3071	0.00946892	1.88291	0.0597126	0.00494766	30246	14712	14436
MI2950	WM056	MI3071	0.00834934	1.56386	0.117849	0.00433081	30981	14432	14193
MI2950	WM329	MI3071	0.0692059	7.18763	6.5925e-13	0.0299671	43386	12885	11217
MI2950	WM330	MI3071	0.074942	8.48415	2.3e-16	0.0324507	43717	12981	11171
MI2950	WM340	MI3071	0.0190925	2.32388	0.0201318	0.00799555	44461	11903	11457
WM436	MI2950	MI3071	0.0125272	2.46428	0.0137289	0.0051413	44012	11639	11351
MI2950	WM441	MI3071	0.0165255	2.88642	0.00389647	0.00853781	30530	14640	14164
MI2950	WM442	MI3071	0.020397	2.98801	0.00280798	0.0106885	30173	14908	14312
MI2950	WM561	MI3071	0.0247379	5.02104	5.13925e-07	0.0128734	29883	14664	13956
MI2950	WM562	MI3071	0.0173916	2.58859	0.00963703	0.00906887	30152	14771	14266
MI2950	WM563	MI3071	0.00516831	0.799051	0.424261	0.00268918	23688	11183	11068
MI3071	WM579	MI2950	0.0654113	7.92339	2.22045e-15	0.014626	43877	8600	7544
MI3071	WM580	MI2950	0.0725405	9.81184	2.3e-16	0.0163464	43888	8716	7537
MI3071	WM581	MI2950	0.0649623	7.10067	1.24145e-12	0.0145714	43956	8623	7571
MI2950	XJ160	MI3071	0.0184689	3.1563	0.00159784	0.00964832	30213	14834	14296
MI3076	MI375	MI2950	0.0642615	13.7098	2.3e-16	0.035398	35808	21977	19323
MI3076	MI377	MI2950	0.0748597	10.7637	2.3e-16	0.0410703	40377	24804	21349
MI605	MI2950	MI3076	0.128399	18.7711	2.3e-16	0.0619238	24388	13134	10145
MI2950	MI3076	MI711	0.0179855	3.16381	0.00155719	0.00805376	38036	21876	21103
MI2950	MI3076	MI722	0.0200404	2.64498	0.00816969	0.00925798	28062	15397	14792
MI3076	MI894	MI2950	0.056699	10.4807	2.3e-16	0.0311956	38293	23231	20738
MI3076	WM009	MI2950	0.0446169	10.002	2.3e-16	0.0248424	42920	24771	22655
MI3076	WM056	MI2950	0.0790656	15.2202	2.3e-16	0.0454745	41211	26190	22352
MI2950	WM329	MI3076	0.0685147	11.0349	2.3e-16	0.0385359	48201	24399	21270
MI2950	WM330	MI3076	0.0701693	13.914	2.3e-16	0.0396215	48697	24585	21361
MI2950	WM340	MI3076	0.0869575	17.5758	2.3e-16	0.0484331	48793	24631	20690
MI2950	WM436	MI3076	0.0699361	15.6026	2.3e-16	0.0388943	48250	24195	21032
MI3076	WM441	MI2950	0.0656263	11.5151	2.3e-16	0.0370414	42695	25607	22453
MI3076	WM442	MI2950	0.0494382	8.31624	2.3e-16	0.0275422	43405	24889	22544
MI3076	WM561	MI2950	0.0554763	10.4232	2.3e-16	0.0309114	42725	24781	22176
MI3076	WM562	MI2950	0.0507662	9.27648	2.3e-16	0.0281207	42699	24755	22363
MI3076	WM563	MI2950	0.0665966	11.6398	2.3e-16	0.0386009	32461	21325	18662
MI2950	MI3076	WM579	0.0153461	2.60119	0.00929	0.0063802	39554	22330	21655
MI2950	MI3076	WM580	0.0172296	3.24715	0.00116566	0.00718817	39397	22376	21618
MI2950	MI3076	WM581	0.0176741	2.92268	0.00347032	0.00735482	39538	22341	21565
MI3076	XJ160	MI2950	0.0494544	8.28968	2.3e-16	0.0275181	43135	24860	22517
MI375	MI377	MI2950	0.0147099	1.94168	0.0521763	0.0066752	50113	16728	16243
MI605	MI2950	MI375	0.153342	19.3564	2.3e-16	0.0601383	20660	12132	8906
MI2950	MI375	MI711	0.0505398	10.723	2.3e-16	0.0219957	35354	19560	17678
MI2950	MI375	MI722	0.05141	9.06243	2.3e-16	0.0230245	25760	13590	12261
MI894	MI375	MI2950	0.00528938	0.800023	0.423697	0.00199508	54172	13114	12976
WM009	MI375	MI2950	0.0210091	4.96864	6.74252e-07	0.0101183	50492	18273	17521
MI375	WM056	MI2950	0.0222562	4.68668	2.77669e-06	0.0108004	51688	18074	17287
MI2950	WM329	MI375	0.0961628	14.1829	2.3e-16	0.0440369	40904	23482	19362
MI2950	WM330	MI375	0.105654	16.1669	2.3e-16	0.0484083	41077	23750	19211
MI2950	WM340	MI375	0.116842	16.836	2.3e-16	0.0530032	41297	23753	18783
MI2950	WM436	MI375	0.105579	17.9235	2.3e-16	0.0480241	40732	23561	19061
MI375	WM441	MI2950	0.00533685	1.08759	0.276775	0.00252917	53211	17519	17333
WM442	MI375	MI2950	0.0136642	2.67391	0.00749733	0.00660552	50530	18138	17649
WM561	MI375	MI2950	0.00774795	1.63988	0.101031	0.00371096	50536	17624	17353
WM562	MI375	MI2950	0.0150325	2.25824	0.023931	0.00724275	50361	18096	17560
MI375	WM563	MI2950	0.00609965	1.07582	0.282008	0.00300194	39843	14680	14502
MI2950	MI375	WM579	0.0419718	7.85208	3.9968e-15	0.0169405	36850	19848	18249
MI2950	MI375	WM580	0.0419876	9.29427	2.3e-16	0.016976	36717	19816	18219
MI2950	MI375	WM581	0.0442715	8.20179	2.3e-16	0.0178945	36785	19861	18177
XJ160	MI375	MI2950	0.0150824	2.80096	0.00509515	0.00731641	50568	18239	17697
MI605	MI2950	MI377	0.152641	19.4409	2.3e-16	0.0597735	23609	14087	10356
MI2950	MI377	MI711	0.0588432	10.2469	2.3e-16	0.0255059	40061	22124	19665
MI2950	MI377	MI722	0.0617007	8.42061	2.3e-16	0.0275919	29536	15607	13793
MI894	MI377	MI2950	0.0204163	2.42761	0.0151986	0.00925116	53627	17968	17249
WM009	MI377	MI2950	0.033915	4.94071	7.78397e-07	0.0165061	56641	20974	19598
MI377	WM056	MI2950	0.0102832	2.06527	0.0388979	0.00501034	59448	19993	19586
MI2950	WM329	MI377	0.101375	20.0636	2.3e-16	0.0465055	45458	26748	21824
MI2950	WM330	MI377	0.106317	23.4914	2.3e-16	0.0488237	45769	26951	21771
MI2950	WM340	MI377	0.118561	28.067	2.3e-16	0.0535652	45890	26808	21125
MI2950	WM436	MI377	0.11054	22.9246	2.3e-16	0.050299	45322	26789	21456
WM441	MI377	MI2950	0.00935016	1.76295	0.0779093	0.00437318	61181	19431	19071
WM442	MI377	MI2950	0.0289754	3.86313	0.000111942	0.0140049	56861	20668	19504
WM561	MI377	MI2950	0.021625	2.9589	0.00308742	0.0105023	56786	20338	19477
WM562	MI377	MI2950	0.0268039	4.57667	4.72434e-06	0.0129941	56602	20648	19570
WM563	MI377	MI2950	0.00551125	0.726706	0.467406	0.00268422	46015	16329	16150
MI2950	MI377	WM579	0.0524688	9.17756	2.3e-16	0.0211006	41675	22466	20226
MI2950	MI377	WM580	0.0530934	9.6791	2.3e-16	0.0213834	41507	22443	20180
MI2950	MI377	WM581	0.0562145	9.89264	2.3e-16	0.0226402	41636	22528	20130
XJ160	MI377	MI2950	0.0285771	4.02468	5.70534e-05	0.0139108	56489	20804	19648
MI605	MI2950	MI711	0.026676	5.86124	4.59416e-09	0.00915302	29959	9487	8994
MI605	MI2950	MI722	0.0357027	3.70293	0.000213126	0.012787	20361	6382	5942
MI605	MI2950	MI894	0.150636	19.8731	2.3e-16	0.0592516	22395	13123	9687
MI605	MI2950	WM009	0.141084	22.9206	2.3e-16	0.0475992	24722	14344	10797
MI605	MI2950	WM056	0.146578	23.7272	2.3e-16	0.0531209	23853	14526	10812
WM329	MI2950	MI605	0.11279	19.2362	2.3e-16	0.0990244	18597	15322	12216
WM330	MI2950	MI605	0.110341	19.9401	2.3e-16	0.0974071	18852	15386	12328
WM340	MI2950	MI605	0.105709	13.6484	2.3e-16	0.0919577	18837	15010	12140
WM436	MI2950	MI605	0.12163	18.058	2.3e-16	0.104606	18699	15248	11941
MI605	MI2950	WM441	0.142981	20.4459	2.3e-16	0.049695	24406	14489	10864
MI605	MI2950	WM442	0.137118	20.0498	2.3e-16	0.0446711	24580	14380	10912
MI605	MI2950	WM561	0.137271	17.5139	2.3e-16	0.0457905	24254	14192	10766
MI605	MI2950	WM562	0.133286	16.9467	2.3e-16	0.0454109	24508	14259	10905
MI605	MI2950	WM563	0.144542	20.2885	2.3e-16	0.0567196	18480	11157	8339
MI605	MI2950	WM579	0.0272158	5.87354	4.26583e-09	0.00871685	31170	9851	9329
MI605	MI2950	WM580	0.0285833	5.58976	2.27378e-08	0.00921474	31123	9896	9346
MI605	MI2950	WM581	0.0296316	7.34193	2.10498e-13	0.00947764	31154	9851	9284
MI605	MI2950	XJ160	0.138541	17.3484	2.3e-16	0.0452907	24603	14357	10863
MI722	MI711	MI2950	0.0315122	4.70275	2.56683e-06	0.00464643	51482	5532	5194
MI2950	MI894	MI711	0.0493298	8.24427	2.3e-16	0.0215337	37559	20942	18973
MI2950	WM009	MI711	0.0418814	9.6214	2.3e-16	0.0188998	40435	22949	21104
MI2950	WM056	MI711	0.0366847	8.41002	2.3e-16	0.0163517	41616	22339	20758
MI2950	WM329	MI711	0.12385	15.1417	2.3e-16	0.0465443	60180	20576	16041
MI2950	WM330	MI711	0.120072	14.011	2.3e-16	0.0452119	60708	20583	16170
MI2950	WM340	MI711	0.0560681	8.06638	6.66134e-16	0.0201094	61859	18487	16524
MI2950	WM436	MI711	0.00536652	1.26417	0.20617	0.0018965	61522	17329	17144
MI2950	WM441	MI711	0.0460259	9.86473	2.3e-16	0.0205276	41075	22761	20758
MI2950	WM442	MI711	0.0501694	9.18897	2.3e-16	0.0226199	40451	23099	20892
MI2950	WM561	MI711	0.0466634	9.72956	2.3e-16	0.0209639	40250	22688	20665
MI2950	WM562	MI711	0.0461905	8.75391	2.3e-16	0.0206931	40386	22842	20825
MI2950	WM563	MI711	0.0232505	6.21912	4.99961e-10	0.0104667	33371	17978	17161
WM579	MI711	MI2950	0.0506312	7.12142	1.06826e-12	0.00717634	79069	7657	6919
WM580	MI711	MI2950	0.044561	7.06321	1.62692e-12	0.0062061	79091	7466	6829
WM581	MI711	MI2950	0.0575365	6.29738	3.02727e-10	0.008074	79072	7637	6806
MI2950	XJ160	MI711	0.0450824	10.1218	2.3e-16	0.0202609	40472	22915	20938
MI2950	MI894	MI722	0.0517888	7.85176	3.9968e-15	0.0233683	27702	14714	13265
MI2950	WM009	MI722	0.0312994	5.13498	2.82171e-07	0.0145678	30033	15997	15026
MI2950	WM056	MI722	0.0320901	5.7512	8.8611e-09	0.0147726	30929	15663	14689
MI2950	WM329	MI722	0.112195	10.2061	2.3e-16	0.0435835	44073	14369	11470
MI2950	WM330	MI722	0.10998	9.91736	2.3e-16	0.0427795	44354	14387	11536
MI2950	WM340	MI722	0.0510308	4.75653	1.96948e-06	0.0188291	45164	12924	11669
WM436	MI2950	MI722	0.00135462	0.178987	0.857948	0.000495302	44967	12197	12164
MI2950	WM441	MI722	0.043228	7.31609	2.55351e-13	0.0198442	30445	15952	14630
MI2950	WM442	MI722	0.0471042	7.24244	4.40759e-13	0.0219734	30097	16272	14808
MI2950	WM561	MI722	0.050219	8.48023	2.3e-16	0.023146	29865	15946	14421
MI2950	WM562	MI722	0.0486612	6.50198	7.92721e-11	0.0225852	30057	16195	14692
MI2950	WM563	MI722	0.0234256	3.64162	0.000270924	0.0109019	24271	12473	11902
WM579	MI722	MI2950	0.0168418	2.01306	0.0441087	0.00271816	53798	6098	5896
WM580	MI722	MI2950	0.00649954	0.901894	0.367113	0.00103873	53664	5962	5885
WM581	MI722	MI2950	0.0217739	2.26134	0.0237384	0.00348268	54065	6077	5818
MI2950	XJ160	MI722	0.0398107	6.68292	2.34226e-11	0.0184348	30078	16037	14809
WM009	MI894	MI2950	0.0151366	3.03703	0.00238923	0.00736648	53660	19583	18999
MI894	WM056	MI2950	0.0283589	4.13621	3.53093e-05	0.0137868	55239	19491	18416
MI2950	WM329	MI894	0.0994881	13.2914	2.3e-16	0.0457689	43814	25236	20669
MI2950	WM330	MI894	0.107609	16.4858	2.3e-16	0.0494349	44012	25439	20496
MI2950	WM340	MI894	0.121306	20.0532	2.3e-16	0.0549249	44150	25383	19891
MI2950	WM436	MI894	0.111482	16.0756	2.3e-16	0.0507637	43645	25284	20212
MI894	WM441	MI2950	0.00973582	1.52549	0.127137	0.00461445	56905	18824	18461
WM442	MI894	MI2950	0.0105323	1.67315	0.0942982	0.00512185	53917	19429	19024
WM561	MI894	MI2950	0.00412917	0.666322	0.505205	0.00200015	53939	18968	18812
WM562	MI894	MI2950	0.00940766	1.39794	0.16213	0.00457211	53603	19367	19006
MI894	WM563	MI2950	0.0116513	1.60595	0.108284	0.00573665	42797	15846	15481
MI2950	MI894	WM579	0.0421722	8.16135	2.3e-16	0.0171018	39164	21302	19578
MI2950	MI894	WM580	0.0395198	7.0563	1.70997e-12	0.016049	39067	21214	19601
MI2950	MI894	WM581	0.0422169	7.6145	2.64233e-14	0.0170906	39156	21231	19511
XJ160	MI894	MI2950	0.0098979	1.42956	0.152844	0.00482041	53717	19437	19056
WM009	WM056	MI2950	0.0419536	9.83788	2.3e-16	0.0212013	58179	22017	20244
MI2950	WM329	WM009	0.123457	21.5337	2.3e-16	0.0481174	47091	27946	21804
MI2950	WM330	WM009	0.129909	28.4743	2.3e-16	0.0506923	47381	28198	21714
MI2950	WM340	WM009	0.145334	29.8739	2.3e-16	0.0562313	47592	28343	21150
MI2950	WM436	WM009	0.127279	25.8365	2.3e-16	0.0493648	47163	27943	21633
WM009	WM441	MI2950	0.02592	5.93436	2.95001e-09	0.0122561	61178	20463	19429
WM009	WM442	MI2950	0.00702911	1.16869	0.242527	0.00267912	77707	16189	15963
WM009	WM561	MI2950	0.01374	2.4201	0.0155161	0.00555948	73578	17117	16653
WM009	WM562	MI2950	0.00838941	1.44426	0.148667	0.00335789	75228	17008	16725
WM009	WM563	MI2950	0.0254616	4.52288	6.10044e-06	0.0129845	46066	17882	16994
MI2950	WM009	WM579	0.0649075	14.1467	2.3e-16	0.027262	41471	24052	21120
MI2950	WM009	WM580	0.0634636	13.919	2.3e-16	0.0267588	41407	24038	21169
MI2950	WM009	WM581	0.0676915	14.7256	2.3e-16	0.0284801	41470	24101	21045
WM009	XJ160	MI2950	0.00642385	1.16571	0.243733	0.00251319	76710	16607	16395
MI2950	WM329	WM056	0.125457	22.576	2.3e-16	0.0532001	45455	28496	22143
MI2950	WM330	WM056	0.134096	30.1633	2.3e-16	0.0569373	45639	28810	21997
MI2950	WM340	WM056	0.145522	36.5109	2.3e-16	0.0611592	45897	28803	21485
MI2950	WM436	WM056	0.129783	25.8866	2.3e-16	0.0546291	45443	28431	21899
WM441	WM056	MI2950	0.0191166	4.84006	1.298e-06	0.00916687	63595	20178	19421
WM442	WM056	MI2950	0.0372056	6.88321	5.85199e-12	0.0188272	57878	21884	20314
WM561	WM056	MI2950	0.0313415	6.02029	1.74107e-09	0.0157426	57796	21307	20012
WM562	WM056	MI2950	0.0356819	6.95274	3.58247e-12	0.0179715	58144	21711	20215
WM563	WM056	MI2950	0.0175974	3.63597	0.000276932	0.00879686	48727	17001	16413
MI2950	WM056	WM579	0.0548158	10.8836	2.3e-16	0.0228382	42925	23409	20976
MI2950	WM056	WM580	0.052672	12.3376	2.3e-16	0.0219705	42815	23313	20980
MI2950	WM056	WM581	0.0562442	12.0401	2.3e-16	0.0234326	42906	23390	20899
XJ160	WM056	MI2950	0.0380652	7.73618	1.02141e-14	0.0192642	57544	21912	20305
WM329	WM330	MI2950	0.00770795	1.45006	0.14704	0.00553208	51660	21310	20984
WM329	WM340	MI2950	0.02316	4.38015	1.18597e-05	0.0186982	43195	24342	23240
WM329	WM436	MI2950	0.00407835	0.831551	0.405662	0.00361654	37093	26220	26007
MI2950	WM329	WM441	0.12703	18.4005	2.3e-16	0.0516245	46311	28484	22063
MI2950	WM329	WM442	0.123282	19.8683	2.3e-16	0.046128	46958	28068	21907
MI2950	WM329	WM561	0.111731	15.3803	2.3e-16	0.0428345	46529	27502	21974
MI2950	WM329	WM562	0.114366	16.5455	2.3e-16	0.0449633	47073	27809	22101
MI2950	WM329	WM563	0.127672	22.0048	2.3e-16	0.0585532	37366	22841	17669
MI2950	WM329	WM579	0.153771	21.4836	2.3e-16	0.0544128	61670	21913	16072
MI2950	WM329	WM580	0.152951	21.8335	2.3e-16	0.054175	61503	21849	16052
MI2950	WM329	WM581	0.151387	23.3431	2.3e-16	0.0535481	61735	21809	16074
MI2950	WM329	XJ160	0.111402	18.39	2.3e-16	0.0416739	47120	27565	22039
WM330	WM340	MI2950	0.0162266	4.15422	3.26396e-05	0.0132493	42962	24362	23584
WM436	WM330	MI2950	0.00204382	0.470371	0.63809	0.00182019	37018	26230	26123
MI2950	WM330	WM441	0.128998	27.777	2.3e-16	0.0524918	46708	28628	22086
MI2950	WM330	WM442	0.126442	25.1949	2.3e-16	0.0473366	47314	28223	21887
MI2950	WM330	WM561	0.120241	26.209	2.3e-16	0.0458985	46636	27647	21712
MI2950	WM330	WM562	0.120482	22.1441	2.3e-16	0.0471362	47247	27886	21889
MI2950	WM330	WM563	0.132645	26.9685	2.3e-16	0.0611323	37737	23102	17691
MI2950	WM330	WM579	0.151306	20.8011	2.3e-16	0.0533868	62121	21842	16101
MI2950	WM330	WM580	0.147699	22.1612	2.3e-16	0.0522742	62054	21773	16169
MI2950	WM330	WM581	0.151722	23.9042	2.3e-16	0.0537795	62218	21900	16130
MI2950	WM330	XJ160	0.115573	25.0086	2.3e-16	0.0432279	47439	27722	21978
WM436	WM340	MI2950	0.0172333	3.24846	0.00116033	0.0150371	37415	26090	25206
MI2950	WM340	WM441	0.146873	32.9151	2.3e-16	0.0591917	46829	28802	21425
MI2950	WM340	WM442	0.144314	23.4115	2.3e-16	0.053499	47428	28391	21230
MI2950	WM340	WM561	0.131709	20.8046	2.3e-16	0.0497811	46902	27655	21218
MI2950	WM340	WM562	0.13405	23.7487	2.3e-16	0.0521277	47536	28053	21421
MI2950	WM340	WM563	0.153334	30.7956	2.3e-16	0.0697299	37695	23212	17040
MI2950	WM340	WM579	0.0940001	13.965	2.3e-16	0.0316705	63203	19820	16414
MI2950	WM340	WM580	0.0936499	13.6774	2.3e-16	0.0316385	63080	19806	16414
MI2950	WM340	WM581	0.0896494	13.4395	2.3e-16	0.03015	63290	19660	16425
MI2950	WM340	XJ160	0.132465	24.3041	2.3e-16	0.0491124	47602	27896	21370
MI2950	WM436	WM441	0.123943	27.9307	2.3e-16	0.050114	46553	28302	22060
MI2950	WM436	WM442	0.132012	23.7553	2.3e-16	0.049298	46966	28272	21678
MI2950	WM436	WM561	0.122969	23.0596	2.3e-16	0.0468654	46372	27652	21596
MI2950	WM436	WM562	0.126405	22.6438	2.3e-16	0.0494537	46942	28012	21725
MI2950	WM436	WM563	0.139037	34.148	2.3e-16	0.0633691	37235	22959	17354
MI2950	WM436	WM579	0.0179742	3.59792	0.000320768	0.0059181	63238	18010	17374
MI2950	WM436	WM580	0.0214726	5.3995	6.68274e-08	0.00709418	63042	18077	17317
MI2950	WM436	WM581	0.021911	4.28577	1.82106e-05	0.00723766	63249	18096	17320
MI2950	WM436	XJ160	0.124302	21.1753	2.3e-16	0.0464421	47051	27890	21723
WM442	WM441	MI2950	0.0200476	4.42707	9.55214e-06	0.00952415	61120	20378	19577
WM561	WM441	MI2950	0.0153351	2.6836	0.00728345	0.00677345	66780	18605	18043
WM562	WM441	MI2950	0.0189141	3.46752	0.000525286	0.00902703	61175	20417	19659
WM441	WM563	MI2950	0.00251301	0.429141	0.667821	0.00124334	49690	16755	16671
MI2950	WM441	WM579	0.071894	14.5319	2.3e-16	0.0299699	42167	24019	20797
MI2950	WM441	WM580	0.0707369	16.6411	2.3e-16	0.0295141	42044	23939	20776
MI2950	WM441	WM581	0.0719623	16.4446	2.3e-16	0.0299013	42119	23886	20679
XJ160	WM441	MI2950	0.0204213	4.5336	5.7987e-06	0.00983166	60400	20662	19835
WM442	WM561	MI2950	0.00798895	1.45745	0.144994	0.00292036	79694	15330	15087
WM442	WM562	MI2950	0.00166656	0.245233	0.806276	0.000642696	76981	16228	16174
WM442	WM563	MI2950	0.0196821	3.33503	0.000852905	0.0100644	46246	17770	17084
MI2950	WM442	WM579	0.0746374	13.977	2.3e-16	0.0314515	41536	24340	20959
MI2950	WM442	WM580	0.074528	15.3775	2.3e-16	0.0314932	41413	24330	20955
MI2950	WM442	WM581	0.0745667	14.5531	2.3e-16	0.031366	41526	24239	20875
XJ160	WM442	MI2950	0.00118633	0.290305	0.771583	0.000356672	92578	12659	12629
WM562	WM561	MI2950	0.00655394	1.03933	0.298652	0.00263535	73492	16817	16598
WM561	WM563	MI2950	0.0136873	2.43108	0.0150541	0.00690433	46533	17219	16754
MI2950	WM561	WM579	0.0613605	11.2953	2.3e-16	0.0256427	41448	23576	20850
MI2950	WM561	WM580	0.0628826	12.4043	2.3e-16	0.026364	41340	23613	20819
MI2950	WM561	WM581	0.0602774	11.7272	2.3e-16	0.025192	41520	23509	20836
XJ160	WM561	MI2950	0.00856881	1.82345	0.0682357	0.0031484	79145	15419	15157
WM562	WM563	MI2950	0.0178474	3.96542	7.32671e-05	0.00909799	46356	17651	17032
MI2950	WM562	WM579	0.0622231	10.6424	2.3e-16	0.0260288	41669	23857	21062
MI2950	WM562	WM580	0.0636611	11.3152	2.3e-16	0.0266973	41516	23876	21018
MI2950	WM562	WM581	0.0640214	11.9539	2.3e-16	0.0268068	41667	23866	20994
XJ160	WM562	MI2950	0.00252587	0.424833	0.670959	0.000975784	76690	16273	16191
MI2950	WM563	WM579	0.034931	7.70008	1.35447e-14	0.0146712	34486	18710	17447
MI2950	WM563	WM580	0.0330462	7.70877	1.26565e-14	0.0138921	34405	18647	17454
MI2950	WM563	WM581	0.0350054	9.55541	2.3e-16	0.0146831	34537	18642	17381
XJ160	WM563	MI2950	0.0199215	3.1442	0.00166544	0.0101963	46160	17791	17096
WM579	WM580	MI2950	0.00637119	0.773249	0.439375	0.000879339	84624	7266	7174
WM581	WM579	MI2950	0.00513831	0.563231	0.573278	0.000696591	84771	7140	7067
MI2950	XJ160	WM579	0.0607603	14.656	2.3e-16	0.0255456	41767	23970	21224
WM581	WM580	MI2950	0.0111049	1.4063	0.159634	0.00152835	83952	7284	7124
MI2950	XJ160	WM580	0.0604042	15.906	2.3e-16	0.0253826	41581	23875	21155
MI2950	XJ160	WM581	0.0622039	14.1047	2.3e-16	0.026079	41699	23881	21084
MI3076	MI375	MI3071	0.00652591	1.13667	0.255676	0.0027668	46648	14421	14234
MI3076	MI377	MI3071	0.0190201	4.17012	3.04441e-05	0.00803355	53009	16421	15808
MI605	MI3076	MI3071	0.0171377	2.92188	0.00347928	0.00934413	20327	12434	12015
MI3071	MI711	MI3076	0.114334	13.9593	2.3e-16	0.0250382	58356	11564	9191
MI3071	MI722	MI3076	0.0914826	14.8578	2.3e-16	0.0196677	42100	7958	6624
MI3076	MI894	MI3071	0.0103521	2.33211	0.019695	0.00440991	50065	15567	15248
MI3076	WM009	MI3071	0.00166657	0.321964	0.74748	0.000723496	55696	16829	16773
WM056	MI3076	MI3071	0.00159114	0.317189	0.7511	0.000704088	54132	16996	16942
MI3076	WM329	MI3071	0.0492165	7.35657	1.88738e-13	0.0260208	41990	21425	19415
MI3076	WM330	MI3071	0.05239	7.7271	1.11022e-14	0.027729	42268	21554	19408
MI3076	WM340	MI3071	0.01111	2.58577	0.00971628	0.00571082	43070	20113	19671
WM436	MI3076	MI3071	0.0172678	4.5713	4.84703e-06	0.00880577	42941	20236	19549
MI3076	WM441	MI3071	0.00633736	1.24637	0.212628	0.00276582	55520	16991	16777
MI3076	WM442	MI3071	0.0131755	2.54599	0.010897	0.00572522	55807	17033	16590
MI3076	WM561	MI3071	0.0196399	4.88221	1.04903e-06	0.00848333	55152	16847	16198
MI3076	WM562	MI3071	0.0126945	2.30825	0.0209855	0.0054987	55459	16952	16527
WM563	MI3076	MI3071	0.00986986	1.95376	0.0507294	0.00439253	42130	13813	13543
MI3071	WM579	MI3076	0.0776073	10.1806	2.3e-16	0.0177371	60832	11872	10162
MI3071	WM580	MI3076	0.0868817	10.2281	2.3e-16	0.0199134	60836	11997	10079
MI3071	WM581	MI3076	0.0828704	8.10105	4.44089e-16	0.0190349	61042	11989	10154
MI3076	XJ160	MI3071	0.0102519	2.12022	0.0339874	0.00447173	55759	17048	16702
MI375	MI377	MI3071	0.0150513	2.3225	0.0202061	0.00512631	62436	11667	11321
MI605	MI375	MI3071	0.020504	3.13051	0.001745	0.0110586	18267	10651	10223
MI3071	MI711	MI375	0.152155	17.999	2.3e-16	0.0264245	51099	10586	7790
MI3071	MI722	MI375	0.126822	13.6072	2.3e-16	0.0217284	36499	7228	5601
MI375	MI894	MI3071	0.00205179	0.223706	0.822986	0.000578993	65674	9035	8998
WM009	MI375	MI3071	0.00742525	0.995078	0.319698	0.00269459	62655	12550	12365
WM056	MI375	MI3071	0.00966482	1.73939	0.0819658	0.00345649	63808	12275	12040
MI375	WM329	MI3071	0.0457774	6.51055	7.4875e-11	0.0231108	39991	18036	16457
MI375	WM330	MI3071	0.0486449	5.66567	1.46453e-08	0.0245374	40434	18108	16428
MI375	WM340	MI3071	0.00566211	0.904551	0.365703	0.00278954	41224	16962	16771
WM436	MI375	MI3071	0.025169	4.47265	7.72549e-06	0.0122011	41322	17209	16364
WM441	MI375	MI3071	0.0015683	0.197105	0.843745	0.00055489	65494	12134	12096
MI375	WM442	MI3071	0.00906247	1.45801	0.144839	0.00330178	62476	12582	12356
MI375	WM561	MI3071	0.0140042	2.2507	0.0244044	0.00501301	62616	12273	11934
MI375	WM562	MI3071	0.00577848	0.833742	0.404427	0.0020915	62535	12445	12302
WM563	MI375	MI3071	0.0176159	2.69061	0.00713221	0.00649746	49115	10167	9815
MI3071	WM579	MI375	0.0993256	11.1039	2.3e-16	0.0180498	53513	10758	8814
MI3071	WM580	MI375	0.106721	16.5741	2.3e-16	0.0194832	53475	10868	8772
MI3071	WM581	MI375	0.1106	12.5563	2.3e-16	0.0200938	53656	10865	8701
MI375	XJ160	MI3071	0.00416901	0.750119	0.453183	0.0015196	62398	12525	12421
MI605	MI377	MI3071	0.0286211	4.13397	3.56547e-05	0.0154524	21112	12417	11726
MI3071	MI711	MI377	0.14704	18.6365	2.3e-16	0.0254533	57455	11908	8855
MI3071	MI722	MI377	0.121613	17.1972	2.3e-16	0.0206482	41546	8176	6403
MI894	MI377	MI3071	0.0129186	1.77782	0.075434	0.00435518	66595	12310	11996
WM009	MI377	MI3071	0.0192105	3.44331	0.000574631	0.00708184	70451	14537	13989
WM056	MI377	MI3071	0.0224806	4.58223	4.60035e-06	0.00796652	73419	13895	13284
MI377	WM329	MI3071	0.0363655	6.44187	1.1801e-10	0.0184676	45613	20177	18761
MI377	WM330	MI3071	0.0382438	5.98975	2.1017e-09	0.0194343	45933	20266	18773
WM340	MI377	MI3071	0.00520517	1.0671	0.285925	0.00255764	46838	19022	18825
WM436	MI377	MI3071	0.0344211	9.03406	2.3e-16	0.0167538	46927	19654	18346
WM441	MI377	MI3071	0.0162881	2.30265	0.0212987	0.00564518	74983	13602	13166
WM442	MI377	MI3071	0.0067527	1.37457	0.169264	0.00248071	70386	14238	14047
WM561	MI377	MI3071	0.00112551	0.238894	0.811188	0.000408244	70173	13787	13756
WM562	MI377	MI3071	0.00719272	1.53671	0.124364	0.002639	70322	14213	14010
WM563	MI377	MI3071	0.0349462	5.62147	1.8934e-08	0.0126576	56717	11550	10770
MI3071	WM579	MI377	0.101047	16.4785	2.3e-16	0.0182656	60045	12144	9915
MI3071	WM580	MI377	0.108901	21.2625	2.3e-16	0.0197608	60030	12265	9856
MI3071	WM581	MI377	0.105891	12.3321	2.3e-16	0.0191351	60204	12193	9858
XJ160	MI377	MI3071	0.00987863	1.98329	0.0473351	0.00363259	70019	14312	14032
MI3071	MI711	MI605	0.0696448	9.00781	2.3e-16	0.016987	34113	6489	5644
MI3071	MI722	MI605	0.0471281	4.77032	1.83936e-06	0.0114802	23191	4266	3882
MI605	MI894	MI3071	0.0255914	3.37125	0.000748273	0.0138773	19647	11662	11080
MI605	WM009	MI3071	0.0176239	2.48101	0.0131013	0.00984248	21681	12934	12486
MI605	WM056	MI3071	0.0158973	2.23073	0.0256991	0.00877641	21970	12621	12226
MI605	WM329	MI3071	0.0696008	7.8207	5.32907e-15	0.0333627	29701	11641	10126
MI605	WM330	MI3071	0.0695474	8.39105	2.3e-16	0.0335933	29878	11757	10228
MI605	WM340	MI3071	0.0294367	3.86753	0.000109942	0.0137095	30341	10911	10287
WM436	MI605	MI3071	0.00486316	0.864864	0.387113	0.00223792	30072	10538	10436
MI605	WM441	MI3071	0.0179385	2.57355	0.010066	0.00995692	21920	12853	12400
MI605	WM442	MI3071	0.0219555	3.00763	0.00263296	0.0122198	21917	12940	12384
MI605	WM561	MI3071	0.0284448	4.37576	1.21008e-05	0.0157494	21388	12763	12057
MI605	WM562	MI3071	0.0242446	3.09316	0.00198038	0.0134046	21769	12864	12255
MI605	WM563	MI3071	0.00852479	1.0123	0.311392	0.00479028	16678	9701	9537
MI3071	WM579	MI605	0.0410436	4.30816	1.64616e-05	0.0105718	35688	6823	6285
MI3071	WM580	MI605	0.0491928	4.70093	2.58977e-06	0.0127085	35753	6889	6243
MI3071	WM581	MI605	0.046932	5.15811	2.49457e-07	0.0121434	35877	6893	6275
MI605	XJ160	MI3071	0.0250942	3.58437	0.000337892	0.0139133	21736	12929	12296
MI722	MI711	MI3071	0.0220568	2.56366	0.0103576	0.0166615	17138	7414	7094
MI3071	MI711	MI894	0.153753	19.2761	2.3e-16	0.0269333	54676	11391	8355
MI3071	MI711	WM009	0.146716	24.4635	2.3e-16	0.0224532	59025	12310	9160
MI3071	MI711	WM056	0.146014	18.1119	2.3e-16	0.0230879	58502	12134	9042
MI3071	MI711	WM329	0.174512	24.2853	2.3e-16	0.0314432	57219	13299	9347
MI3071	MI711	WM330	0.165459	21.4879	2.3e-16	0.0297709	57327	13267	9500
MI3071	MI711	WM340	0.14567	27.8085	2.3e-16	0.0258422	58922	12627	9416
MI3071	MI711	WM436	0.122515	16.7117	2.3e-16	0.0222733	60058	12085	9447
MI3071	MI711	WM441	0.143853	17.0381	2.3e-16	0.0225164	58940	12309	9213
MI3071	MI711	WM442	0.140737	20.8842	2.3e-16	0.0208679	58736	12300	9265
MI3071	MI711	WM561	0.139469	18.3058	2.3e-16	0.0210775	57944	12157	9181
MI3071	MI711	WM562	0.141125	19.0719	2.3e-16	0.021691	58688	12234	9208
MI3071	MI711	WM563	0.132682	17.4301	2.3e-16	0.0228741	47025	9685	7416
MI711	WM579	MI3071	0.0246351	2.55144	0.010728	0.0178518	30508	10003	9522
MI711	WM580	MI3071	0.0293965	3.02131	0.00251681	0.0210307	30536	9910	9344
MI711	WM581	MI3071	0.0338663	3.13925	0.00169382	0.0246075	30500	10120	9457
MI3071	MI711	XJ160	0.138383	19.3523	2.3e-16	0.0206834	58891	12286	9299
MI3071	MI722	MI894	0.125757	14.6116	2.3e-16	0.0214248	39237	7712	5989
MI3071	MI722	WM009	0.105406	22.2083	2.3e-16	0.0158224	42909	8332	6743
MI3071	MI722	WM056	0.117208	17.9926	2.3e-16	0.0181644	42278	8307	6564
MI3071	MI722	WM329	0.128007	17.7411	2.3e-16	0.0226852	41633	8909	6887
MI3071	MI722	WM330	0.128082	16.147	2.3e-16	0.0224628	41516	8900	6879
MI3071	MI722	WM340	0.11604	16.827	2.3e-16	0.020219	42634	8579	6795
MI3071	MI722	WM436	0.0928068	14.0542	2.3e-16	0.0165272	43465	8219	6823
MI3071	MI722	WM441	0.11046	17.2108	2.3e-16	0.0168724	42624	8339	6680
MI3071	MI722	WM442	0.10353	16.6507	2.3e-16	0.0151544	42598	8410	6832
MI3071	MI722	WM561	0.109467	17.9214	2.3e-16	0.0162708	41813	8321	6679
MI3071	MI722	WM562	0.104425	17.3381	2.3e-16	0.01587	42467	8387	6801
MI3071	MI722	WM563	0.100434	15.8773	2.3e-16	0.0168409	33421	6459	5280
MI722	WM579	MI3071	0.0390778	6.32782	2.48646e-10	0.0314267	18292	8203	7586
MI722	WM580	MI3071	0.0452204	5.21156	1.87254e-07	0.0362478	18282	8217	7506
MI722	WM581	MI3071	0.046657	4.27799	1.88585e-05	0.0376445	18528	8289	7550
MI3071	MI722	XJ160	0.108654	15.7372	2.3e-16	0.0159609	42656	8423	6772
WM009	MI894	MI3071	0.00837484	1.02431	0.305691	0.00309378	66427	13666	13439
WM056	MI894	MI3071	0.012961	1.64925	0.0990963	0.00463205	68289	13169	12832
MI894	WM329	MI3071	0.0426507	5.596	2.19353e-08	0.0216778	42747	19337	17755
MI894	WM330	MI3071	0.0450475	6.22341	4.86476e-10	0.0229709	43130	19487	17807
MI894	WM340	MI3071	0.00244689	0.419553	0.674812	0.00120319	43988	18026	17938
WM436	MI894	MI3071	0.0265792	4.4411	8.95016e-06	0.0129126	44085	18462	17506
WM441	MI894	MI3071	0.00567896	0.753605	0.451086	0.0020065	69835	13016	12869
MI894	WM442	MI3071	0.00571047	0.882214	0.377661	0.00210613	66394	13561	13407
MI894	WM561	MI3071	0.010197	1.62686	0.103767	0.00365292	66271	13077	12813
MI894	WM562	MI3071	0.00307715	0.40726	0.683817	0.0011227	66262	13365	13283
WM563	MI894	MI3071	0.0246416	3.09827	0.00194653	0.00902261	52622	10936	10410
MI3071	WM579	MI894	0.100695	12.8326	2.3e-16	0.0184273	57192	11554	9440
MI3071	WM580	MI894	0.107625	15.5511	2.3e-16	0.0198169	57242	11686	9415
MI3071	WM581	MI894	0.102754	13.5699	2.3e-16	0.0187696	57346	11553	9400
MI894	XJ160	MI3071	0.00188882	0.303593	0.761438	0.000697569	66438	13526	13475
WM056	WM009	MI3071	0.00366528	0.683707	0.49416	0.00136201	72354	14513	14407
WM009	WM329	MI3071	0.0498827	8.97407	2.3e-16	0.0252423	46649	20805	18828
WM009	WM330	MI3071	0.0529736	8.68909	2.3e-16	0.026796	47066	20901	18798
WM009	WM340	MI3071	0.00987744	1.94881	0.0513179	0.00486705	48263	19528	19146
WM436	WM009	MI3071	0.0195019	5.14154	2.72497e-07	0.00957325	47965	19813	19055
WM009	WM441	MI3071	0.00487665	0.723024	0.469665	0.00173348	75077	14012	13876
WM009	WM442	MI3071	0.0172063	2.88664	0.00389383	0.00505965	91711	11735	11338
WM009	WM561	MI3071	0.0220908	2.86625	0.00415364	0.00674621	87255	12099	11576
WM009	WM562	MI3071	0.0142623	1.42677	0.153646	0.00432602	89135	12054	11715
WM563	WM009	MI3071	0.0120432	1.86504	0.0621764	0.00463926	56681	12185	11895
MI3071	WM579	WM009	0.153194	26.4003	2.3e-16	0.0246728	61155	13260	9737
MI3071	WM580	WM009	0.161159	34.6494	2.3e-16	0.0260901	61142	13405	9684
MI3071	WM581	WM009	0.163611	34.8383	2.3e-16	0.0263139	61227	13360	9603
WM009	XJ160	MI3071	0.0122547	2.18449	0.028926	0.00364512	90555	11812	11526
WM056	WM329	MI3071	0.0537618	9.25807	2.3e-16	0.0270803	48060	20610	18507
WM056	WM330	MI3071	0.0554789	8.73906	2.3e-16	0.0279131	48359	20661	18489
WM056	WM340	MI3071	0.0131234	3.62768	0.000285977	0.00642508	49425	19300	18800
WM436	WM056	MI3071	0.0167633	6.54061	6.12688e-11	0.00818898	49096	19470	18828
WM056	WM441	MI3071	0.00884761	1.49928	0.1338	0.00309824	77999	13740	13499
WM056	WM442	MI3071	0.0165715	2.87752	0.00400818	0.00615634	71884	14692	14213
WM056	WM561	MI3071	0.0216517	4.16271	3.14489e-05	0.0079871	71747	14486	13872
WM056	WM562	MI3071	0.0160704	2.35488	0.0185287	0.00591952	72088	14542	14082
WM563	WM056	MI3071	0.0143456	2.80324	0.00505923	0.00525346	59837	11490	11165
MI3071	WM579	WM056	0.144118	23.2402	2.3e-16	0.0239648	60684	12968	9701
MI3071	WM580	WM056	0.148457	37.2371	2.3e-16	0.0248649	60714	13097	9711
MI3071	WM581	WM056	0.145905	21.8702	2.3e-16	0.0243854	60919	13053	9729
WM056	XJ160	MI3071	0.0129888	2.89333	0.00381178	0.00485936	71471	14740	14362
WM329	WM330	MI3071	0.00435201	0.829883	0.406605	0.00148041	85010	13039	12926
WM340	WM329	MI3071	0.0563042	8.13162	4.44089e-16	0.0204781	77158	14971	13375
WM436	WM329	MI3071	0.0878016	12.0385	2.3e-16	0.0345897	70554	16930	14197
WM441	WM329	MI3071	0.0467638	7.24226	4.41203e-13	0.0234552	47478	20515	18682
WM442	WM329	MI3071	0.0401265	7.92925	2.22045e-15	0.0205224	46752	20724	19125
WM561	WM329	MI3071	0.0369037	6.40814	1.47303e-10	0.0189482	46122	20455	18999
WM562	WM329	MI3071	0.0410615	5.73499	9.75198e-09	0.0210236	46602	20752	19115
WM563	WM329	MI3071	0.0565847	7.34096	2.12053e-13	0.028745	38353	16740	14947
MI3071	WM579	WM329	0.188785	31.3565	2.3e-16	0.035923	59205	14480	9881
MI3071	WM580	WM329	0.192437	30.2329	2.3e-16	0.036609	59195	14506	9824
MI3071	WM581	WM329	0.186881	22.5237	2.3e-16	0.0353854	59397	14385	9855
XJ160	WM329	MI3071	0.0427184	7.72204	1.15463e-14	0.0219952	46497	20943	19227
WM340	WM330	MI3071	0.0600746	8.80703	2.3e-16	0.022062	77313	15202	13479
WM436	WM330	MI3071	0.091358	12.0959	2.3e-16	0.0359868	70927	17017	14168
WM441	WM330	MI3071	0.0494904	7.27747	3.40172e-13	0.0249278	47703	20697	18745
WM442	WM330	MI3071	0.0426405	7.42691	1.11244e-13	0.0218305	47006	20833	19129
WM561	WM330	MI3071	0.0395951	6.54219	6.06253e-11	0.0202226	46343	20440	18883
WM562	WM330	MI3071	0.0435411	5.51593	3.46938e-08	0.022394	46741	20935	19188
WM563	WM330	MI3071	0.0598441	8.23424	2.3e-16	0.0304635	38506	16860	14956
MI3071	WM579	WM330	0.178152	28.329	2.3e-16	0.0337538	59343	14387	10036
MI3071	WM580	WM330	0.182342	28.2539	2.3e-16	0.0346783	59363	14476	10011
MI3071	WM581	WM330	0.183265	29.1144	2.3e-16	0.0346639	59481	14424	9956
XJ160	WM330	MI3071	0.0454489	7.52036	5.4623e-14	0.0233469	46629	20990	19165
WM436	WM340	MI3071	0.0379764	6.41106	1.44514e-10	0.014373	72376	15552	14414
WM441	WM340	MI3071	0.00625633	1.33049	0.183356	0.00307739	48876	19381	19140
WM340	WM442	MI3071	0.000592738	0.131948	0.895025	0.000294566	48217	19413	19390
WM340	WM561	MI3071	0.00343875	0.80119	0.423021	0.0017114	47274	19259	19127
WM562	WM340	MI3071	0.000721352	0.121212	0.903523	0.000358892	48016	19422	19394
WM563	WM340	MI3071	0.0195671	4.75987	1.9372e-06	0.00963077	39544	15684	15082
MI3071	WM579	WM340	0.16822	25.473	2.3e-16	0.0313925	60851	13792	9820
MI3071	WM580	WM340	0.171354	34.4103	2.3e-16	0.0322017	60921	13911	9841
MI3071	WM581	WM340	0.161975	25.3064	2.3e-16	0.0301531	61115	13684	9869
XJ160	WM340	MI3071	0.00263947	0.664509	0.506365	0.00131762	47869	19563	19460
WM436	WM441	MI3071	0.0230237	5.07079	3.96178e-07	0.0113086	48587	19884	18989
WM436	WM442	MI3071	0.0295946	6.95758	3.46168e-12	0.0145546	48230	20039	18887
WM436	WM561	MI3071	0.0333507	8.13092	4.44089e-16	0.0163903	47476	19861	18579
WM436	WM562	MI3071	0.0285405	5.47131	4.46724e-08	0.0140138	48054	19965	18857
WM436	WM563	MI3071	0.00757453	1.72063	0.0853189	0.00371712	39289	15497	15264
MI3071	WM579	WM436	0.10473	18.9067	2.3e-16	0.0199852	62432	12716	10305
MI3071	WM580	WM436	0.119406	22.9985	2.3e-16	0.022828	62328	12895	10144
MI3071	WM581	WM436	0.113073	13.9419	2.3e-16	0.0214463	62486	12733	10146
WM436	XJ160	MI3071	0.0262512	6.90018	5.19362e-12	0.0129649	47876	20055	19029
WM441	WM442	MI3071	0.00946077	1.48221	0.138283	0.00335913	74812	14031	13768
WM441	WM561	MI3071	0.0153499	1.96183	0.0497821	0.00509287	80405	13031	12637
WM441	WM562	MI3071	0.00715338	0.897149	0.36964	0.00254512	74956	14009	13810
WM563	WM441	MI3071	0.0175947	2.41432	0.0157645	0.00641785	60406	11596	11195
MI3071	WM579	WM441	0.154981	23.3523	2.3e-16	0.0255205	60992	13310	9738
MI3071	WM580	WM441	0.159632	29.8717	2.3e-16	0.0264272	61022	13421	9726
MI3071	WM581	WM441	0.157351	22.3561	2.3e-16	0.0258869	61167	13324	9701
WM441	XJ160	MI3071	0.00481723	0.744506	0.456571	0.00173733	74107	14184	14048
WM442	WM561	MI3071	0.00506153	0.67119	0.502099	0.00141399	93481	10822	10713
WM562	WM442	MI3071	0.00260824	0.305311	0.760129	0.000769241	90778	11532	11472
WM563	WM442	MI3071	0.0247906	3.51028	0.000447627	0.00947321	56526	12236	11644
MI3071	WM579	WM442	0.149523	21.9244	2.3e-16	0.0233807	60841	13304	9843
MI3071	WM580	WM442	0.15829	32.6616	2.3e-16	0.0247931	60792	13413	9747
MI3071	WM581	WM442	0.150972	24.4458	2.3e-16	0.0235586	61013	13292	9805
XJ160	WM442	MI3071	0.00689206	1.1148	0.264934	0.00162502	106299	9277	9150
WM562	WM561	MI3071	0.00838557	1.24835	0.211902	0.00256889	87227	11905	11707
WM563	WM561	MI3071	0.030353	5.02751	4.96891e-07	0.0113035	57010	11864	11165
MI3071	WM579	WM561	0.131903	18.0612	2.3e-16	0.0208739	60133	12872	9872
MI3071	WM580	WM561	0.138136	24.5774	2.3e-16	0.0218912	60106	12948	9805
MI3071	WM581	WM561	0.130013	18.5599	2.3e-16	0.0205273	60338	12820	9870
XJ160	WM561	MI3071	0.0113605	1.86791	0.0617748	0.00321189	92626	11039	10791
WM563	WM562	MI3071	0.0280145	3.06031	0.00221104	0.0106378	56865	12183	11519
MI3071	WM579	WM562	0.135655	20.0366	2.3e-16	0.0220584	60970	13110	9978
MI3071	WM580	WM562	0.14476	28.3816	2.3e-16	0.023598	60929	13234	9887
MI3071	WM581	WM562	0.142051	17.6109	2.3e-16	0.0230538	61082	13157	9884
XJ160	WM562	MI3071	0.00294525	0.367856	0.71298	0.000871192	90656	11578	11510
MI3071	WM579	WM563	0.11744	15.0467	2.3e-16	0.0211787	48955	10181	8041
MI3071	WM580	WM563	0.124671	19.2488	2.3e-16	0.0225285	48913	10257	7983
MI3071	WM581	WM563	0.116264	16.5365	2.3e-16	0.0209927	49149	10182	8061
WM563	XJ160	MI3071	0.0240518	4.09934	4.14324e-05	0.00915434	56492	12177	11605
WM579	WM580	MI3071	0.00429618	0.665947	0.505445	0.00314337	34455	9935	9850
WM579	WM581	MI3071	0.010874	1.0434	0.296763	0.00790426	34550	9947	9733
MI3071	WM579	XJ160	0.130985	20.7722	2.3e-16	0.0205646	61154	13051	10028
WM580	WM581	MI3071	0.00610392	0.611308	0.540996	0.00456401	33878	10137	10014
MI3071	WM580	XJ160	0.141212	44.4144	2.3e-16	0.022208	61083	13177	9916
MI3071	WM581	XJ160	0.137122	21.9922	2.3e-16	0.0214237	61241	13057	9908
MI375	MI377	MI3076	0.0086435	1.48138	0.138506	0.00590599	52099	25731	25290
MI3076	MI375	MI605	0.0341704	7.3624	1.80744e-13	0.0196963	30928	15526	14500
MI3076	MI375	MI711	0.0319558	7.65924	1.86517e-14	0.011749	62646	22024	20660
MI3076	MI375	MI722	0.0300029	6.56688	5.13816e-11	0.0114258	47211	15809	14888
MI894	MI375	MI3076	0.00624207	0.932989	0.350826	0.00350104	58324	20231	19980
MI375	WM009	MI3076	0.0337985	6.73492	1.64022e-11	0.0250629	51795	28966	27072
MI375	WM056	MI3076	0.0039299	1.02244	0.306573	0.00281408	54311	26951	26740
MI3076	MI375	WM329	0.0841684	21.2791	2.3e-16	0.0381645	46597	33323	28149
MI3076	MI375	WM330	0.0897685	20.79	2.3e-16	0.0407199	46489	33700	28148
MI3076	MI375	WM340	0.0883178	20.0703	2.3e-16	0.0422217	46028	33943	28434
MI3076	MI375	WM436	0.0971071	27.0559	2.3e-16	0.0490663	46538	34018	27996
MI375	WM441	MI3076	0.02819	5.32835	9.91085e-08	0.0202404	55774	27884	26355
MI375	WM442	MI3076	0.0456738	8.51055	2.3e-16	0.0340971	51633	29488	26912
MI375	WM561	MI3076	0.042065	10.6344	2.3e-16	0.0309696	52179	28724	26405
MI375	WM562	MI3076	0.0346646	7.36019	1.83631e-13	0.0256047	51737	28848	26915
WM563	MI375	MI3076	0.0368523	8.34693	2.3e-16	0.0259596	42841	23282	21627
MI3076	MI375	WM579	0.0236379	5.93194	2.99375e-09	0.00811283	64871	22432	21396
MI3076	MI375	WM580	0.0229245	5.42471	5.80471e-08	0.00789141	64599	22400	21396
MI3076	MI375	WM581	0.024495	5.15359	2.55546e-07	0.00841576	64676	22418	21346
MI375	XJ160	MI3076	0.0393257	6.87884	6.03406e-12	0.0294028	51726	29349	27128
MI3076	MI377	MI605	0.0418712	6.90034	5.18763e-12	0.0239618	35358	17617	16201
MI3076	MI377	MI711	0.0416737	9.51148	2.3e-16	0.0152406	70027	24621	22651
MI3076	MI377	MI722	0.0402802	7.38217	1.55653e-13	0.0152251	53088	17820	16440
MI894	MI377	MI3076	0.0125661	1.81061	0.0702014	0.00856164	55174	27397	26717
MI377	WM009	MI3076	0.0261667	5.68468	1.31055e-08	0.019744	57045	32236	30592
WM056	MI377	MI3076	0.00434967	0.815081	0.415026	0.0031015	61726	29671	29414
MI3076	MI377	WM329	0.0986612	24.9343	2.3e-16	0.0445329	51717	37299	30600
MI3076	MI377	WM330	0.10031	27.743	2.3e-16	0.0453061	51702	37580	30728
MI3076	MI377	WM340	0.0991712	24.8275	2.3e-16	0.047293	51193	37928	31084
MI3076	MI377	WM436	0.105272	21.2037	2.3e-16	0.0531621	51752	37986	30750
MI377	WM441	MI3076	0.0234333	3.73452	0.000188074	0.0166048	63133	30179	28797
MI377	WM442	MI3076	0.0366101	8.20811	2.3e-16	0.0275475	57089	32463	30170
MI377	WM561	MI3076	0.0327035	8.29105	2.3e-16	0.0243991	57403	31783	29770
MI377	WM562	MI3076	0.0271173	7.90905	2.66454e-15	0.02031	57092	31987	30298
WM563	MI377	MI3076	0.043611	8.97466	2.3e-16	0.0301737	48730	25629	23487
MI3076	MI377	WM579	0.0370171	8.37786	2.3e-16	0.0126069	72303	25087	23296
MI3076	MI377	WM580	0.0352152	9.06794	2.3e-16	0.0120194	71980	25002	23301
MI3076	MI377	WM581	0.0375934	8.76257	2.3e-16	0.0128204	72179	25075	23258
MI377	XJ160	MI3076	0.0309704	8.76468	2.3e-16	0.0234553	56767	32490	30538
MI605	MI3076	MI711	0.0383301	7.73707	1.02141e-14	0.0178033	27043	18380	17023
MI605	MI3076	MI722	0.0451459	5.74847	9.00533e-09	0.0217426	19301	12698	11601
MI3076	MI894	MI605	0.0289783	4.93812	7.88792e-07	0.0166601	33204	16547	15615
MI3076	WM009	MI605	0.0255824	4.95069	7.39507e-07	0.0149281	37458	17940	17045
MI3076	WM056	MI605	0.0495726	8.47118	2.3e-16	0.0298007	36013	18727	16958
MI605	WM329	MI3076	0.164858	25.6185	2.3e-16	0.0958542	32545	23084	16550
MI605	WM330	MI3076	0.162618	23.2289	2.3e-16	0.0948422	32752	23164	16684
MI605	WM340	MI3076	0.178456	30.3909	2.3e-16	0.103826	32899	23423	16329
MI605	WM436	MI3076	0.168416	27.133	2.3e-16	0.0975292	32410	23099	16440
MI3076	WM441	MI605	0.0388999	7.3556	1.9007e-13	0.023179	37240	18548	17159
MI3076	WM442	MI605	0.0360977	7.1169	1.10378e-12	0.0210444	37468	18097	16836
MI3076	WM561	MI605	0.0345228	8.57198	2.3e-16	0.0200783	36884	17830	16640
MI3076	WM562	MI605	0.0371109	7.84838	4.21885e-15	0.0217508	37123	18193	16891
MI3076	WM563	MI605	0.0468079	7.32655	2.36255e-13	0.0282846	27910	14995	13654
MI605	MI3076	WM579	0.0365844	7.56226	3.95239e-14	0.0159194	28267	18998	17657
MI605	MI3076	WM580	0.0391996	7.27105	3.56604e-13	0.0170733	28026	19008	17574
MI605	MI3076	WM581	0.037444	7.19707	6.15286e-13	0.0162853	28213	18979	17609
MI3076	XJ160	MI605	0.0329909	5.64328	1.6684e-08	0.0192398	37345	18051	16898
MI722	MI711	MI3076	0.0281016	3.47726	0.000506561	0.00430705	71281	7628	7211
MI3076	MI894	MI711	0.0311617	8.55217	2.3e-16	0.0114606	66388	23362	21950
MI3076	WM009	MI711	0.0277521	8.35447	2.3e-16	0.0103475	73357	25053	23700
MI3076	WM056	MI711	0.0186782	5.09061	3.56919e-07	0.00713619	71619	25224	24299
MI3076	WM329	MI711	0.0839379	13.2571	2.3e-16	0.0389136	54611	32794	27715
MI3076	WM330	MI711	0.0818788	13.6465	2.3e-16	0.0378532	54885	32696	27747
MI3076	WM340	MI711	0.0318259	7.49565	6.59472e-14	0.0141722	56197	30038	28185
WM436	MI3076	MI711	0.0113587	3.49342	0.000476874	0.00501808	56356	29338	28679
MI3076	WM441	MI711	0.0310706	6.86413	6.68976e-12	0.0116743	73163	25320	23794
MI3076	WM442	MI711	0.0367233	9.32079	2.3e-16	0.0137331	73841	25337	23542
MI3076	WM561	MI711	0.0343569	8.57395	2.3e-16	0.0127999	72909	24943	23286
MI3076	WM562	MI711	0.0345295	8.98679	2.3e-16	0.0128725	73178	25182	23501
MI3076	WM563	MI711	0.00428499	1.16056	0.24582	0.00165547	57577	20742	20565
WM579	MI711	MI3076	0.0513349	5.58473	2.34058e-08	0.00736326	105938	9943	8972
WM580	MI711	MI3076	0.0358241	4.03154	5.54134e-05	0.00514194	106034	9773	9097
WM581	MI711	MI3076	0.0471654	4.82242	1.41829e-06	0.00683637	105971	10002	9101
MI3076	XJ160	MI711	0.0310592	7.26251	3.79918e-13	0.0115976	73640	25163	23647
MI3076	MI894	MI722	0.0309253	6.13843	8.33408e-10	0.0118334	50226	16968	15950
MI3076	WM009	MI722	0.0135805	2.51477	0.0119109	0.00525089	55837	17987	17505
MI3076	WM056	MI722	0.0134793	2.90782	0.00363956	0.00533471	54477	18233	17748
MI3076	WM329	MI722	0.0712076	10.003	2.3e-16	0.0341632	41523	23543	20413
MI3076	WM330	MI722	0.072774	10.8149	2.3e-16	0.0348975	41792	23608	20405
MI3076	WM340	MI722	0.0257525	4.50399	6.66892e-06	0.0118752	42721	21708	20618
WM436	MI3076	MI722	0.0173107	4.10115	4.11109e-05	0.00791788	42901	21509	20777
MI3076	WM441	MI722	0.0235406	5.86817	4.40631e-09	0.00913232	55745	18218	17380
MI3076	WM442	MI722	0.0311621	7.83533	4.66294e-15	0.0120748	56262	18332	17224
MI3076	WM561	MI722	0.0325271	5.82214	5.80996e-09	0.012537	55397	18078	16939
MI3076	WM562	MI722	0.0328474	5.73384	9.81847e-09	0.0127089	55702	18316	17151
WM563	MI3076	MI722	0.00170666	0.293877	0.768852	0.000689376	43379	14967	14916
WM579	MI722	MI3076	0.0179391	3.29714	0.000976756	0.00297118	74277	8313	8020
WM580	MI722	MI3076	0.00295457	0.465759	0.641388	0.00048841	74135	8147	8099
WM581	MI722	MI3076	0.016991	1.94092	0.0522674	0.00278924	74551	8230	7955
MI3076	XJ160	MI722	0.0257046	4.77963	1.75615e-06	0.00995041	56099	18216	17303
MI894	WM009	MI3076	0.0379101	8.70587	2.3e-16	0.0283026	54124	31129	28855
MI894	WM056	MI3076	0.00650873	0.964667	0.334711	0.00466622	57335	28763	28391
MI3076	MI894	WM329	0.0810387	19.6159	2.3e-16	0.0367099	49337	35177	29903
MI3076	MI894	WM330	0.0854859	22.2698	2.3e-16	0.0387993	49282	35573	29970
MI3076	MI894	WM340	0.0839471	20.1755	2.3e-16	0.0401478	48754	35838	30287
MI3076	MI894	WM436	0.0904913	22.1664	2.3e-16	0.0457459	49238	35827	29881
MI894	WM441	MI3076	0.0334531	5.65824	1.5293e-08	0.0238807	58803	29626	27708
MI894	WM442	MI3076	0.0479166	10.2487	2.3e-16	0.0358908	54214	31525	28642
MI894	WM561	MI3076	0.0446315	9.19467	2.3e-16	0.0329662	54744	30720	28095
MI894	WM562	MI3076	0.0381102	8.48658	2.3e-16	0.0283835	54193	31026	28748
WM563	MI894	MI3076	0.0336187	4.87646	1.08006e-06	0.0237467	45310	24750	23140
MI3076	MI894	WM579	0.0258407	7.12122	1.06981e-12	0.00885876	68664	23839	22638
MI3076	MI894	WM580	0.0224835	5.65483	1.56003e-08	0.00773013	68418	23739	22695
MI3076	MI894	WM581	0.0234985	6.55042	5.73743e-11	0.00805558	68586	23738	22648
MI894	XJ160	MI3076	0.0431165	7.04773	1.81855e-12	0.0323886	54231	31463	28862
WM056	WM009	MI3076	0.0294848	6.62094	3.56934e-11	0.0227861	59382	33362	31451
MI3076	WM009	WM329	0.0954198	31.1222	2.3e-16	0.043712	54537	38171	31521
MI3076	WM009	WM330	0.0985771	34.461	2.3e-16	0.0452941	54526	38604	31676
MI3076	WM009	WM340	0.102186	27.4094	2.3e-16	0.0494705	53807	39051	31810
MI3076	WM009	WM436	0.0991341	25.3882	2.3e-16	0.0507271	54670	38717	31733
WM441	WM009	MI3076	0.00392853	1.0964	0.272906	0.00299459	62359	31688	31440
WM009	WM442	MI3076	0.0133502	4.04038	5.33657e-05	0.00818679	82711	25656	24980
WM009	WM561	MI3076	0.00845231	1.95118	0.0510356	0.00542535	77751	26487	26043
WM009	WM562	MI3076	0.00101348	0.240793	0.809716	0.000642385	79759	26174	26121
WM563	WM009	MI3076	0.068045	15.9842	2.3e-16	0.051302	48184	28928	25242
MI3076	WM009	WM579	0.0574959	12.5389	2.3e-16	0.0201322	75020	26614	23720
MI3076	WM009	WM580	0.0537861	12.613	2.3e-16	0.0188696	74738	26469	23767
MI3076	WM009	WM581	0.0576854	14.6528	2.3e-16	0.0202515	74936	26623	23719
WM009	XJ160	MI3076	0.00672932	1.46756	0.142223	0.00421471	81414	26031	25683
MI3076	WM056	WM329	0.128371	33.3465	2.3e-16	0.0614524	52357	40750	31478
MI3076	WM056	WM330	0.131203	32.0357	2.3e-16	0.0629481	52335	41143	31599
MI3076	WM056	WM340	0.131055	31.5486	2.3e-16	0.0662495	51745	41482	31869
MI3076	WM056	WM436	0.130119	38.3243	2.3e-16	0.0691941	52380	41025	31578
WM056	WM441	MI3076	0.0277686	6.44846	1.12991e-10	0.0200635	66897	31127	29445
WM056	WM442	MI3076	0.0398219	8.3317	2.3e-16	0.0309246	58911	33854	31261
WM056	WM561	MI3076	0.0361812	9.9445	2.3e-16	0.0278189	59324	33092	30781
WM056	WM562	MI3076	0.0302917	7.36419	1.78302e-13	0.0233019	59670	33196	31244
WM563	WM056	MI3076	0.0409776	10.6781	2.3e-16	0.029028	52975	26280	24211
MI3076	WM056	WM579	0.0420669	8.33528	2.3e-16	0.0150586	73373	26580	24434
MI3076	WM056	WM580	0.0381805	7.47857	7.50511e-14	0.0136964	73097	26430	24486
MI3076	WM056	WM581	0.0402985	7.78191	7.10543e-15	0.0144326	73279	26486	24434
WM056	XJ160	MI3076	0.0340911	9.15308	2.3e-16	0.0265673	58477	33776	31549
WM329	WM330	MI3076	0.00419837	0.628035	0.529981	0.00186834	96652	23560	23363
WM329	WM340	MI3076	0.020222	5.84297	5.12768e-09	0.01009	84821	26840	25776
WM329	WM436	MI3076	0.00182482	0.474954	0.63482	0.0010058	76154	29097	28991
MI3076	WM441	WM329	0.117976	24.5863	2.3e-16	0.0549901	54015	39625	31262
MI3076	WM442	WM329	0.100317	28.2072	2.3e-16	0.0458314	54922	38225	31255
MI3076	WM561	WM329	0.0954073	29.4496	2.3e-16	0.0436516	54430	37768	31189
MI3076	WM562	WM329	0.097039	25.6797	2.3e-16	0.0445013	54490	38217	31456
MI3076	WM563	WM329	0.116667	29.3334	2.3e-16	0.0565115	42229	34012	26905
MI3076	WM329	WM579	0.110798	21.2294	2.3e-16	0.0481553	55918	34638	27728
MI3076	WM329	WM580	0.108125	18.8895	2.3e-16	0.0470703	55619	34476	27748
MI3076	WM329	WM581	0.107445	20.0568	2.3e-16	0.0466323	55822	34400	27725
MI3076	XJ160	WM329	0.0896621	22.4148	2.3e-16	0.0409176	54936	37814	31591
WM330	WM340	MI3076	0.0161906	3.4663	0.000527681	0.0081647	84766	27020	26159
WM436	WM330	MI3076	0.00146868	0.312982	0.754295	0.00081539	76448	29321	29235
MI3076	WM441	WM330	0.116753	28.5991	2.3e-16	0.0543761	54060	39762	31448
MI3076	WM442	WM330	0.100167	25.9673	2.3e-16	0.0457726	54955	38436	31437
MI3076	WM561	WM330	0.0986402	38.3198	2.3e-16	0.045184	54373	38136	31288
MI3076	WM562	WM330	0.0963277	25.7423	2.3e-16	0.0440953	54470	38332	31596
MI3076	WM563	WM330	0.117946	28.9911	2.3e-16	0.0568855	42104	34056	26870
MI3076	WM330	WM579	0.108542	20.5196	2.3e-16	0.0470234	56199	34515	27756
MI3076	WM330	WM580	0.104868	19.6765	2.3e-16	0.0456492	56024	34431	27895
MI3076	WM330	WM581	0.107342	21.6675	2.3e-16	0.0466088	56143	34471	27788
MI3076	XJ160	WM330	0.0891907	23.8474	2.3e-16	0.0407974	55034	38089	31851
WM436	WM340	MI3076	0.0163917	4.74701	2.06449e-06	0.00894034	77474	29236	28293
MI3076	WM441	WM340	0.120323	28.9064	2.3e-16	0.0593107	53471	40405	31726
MI3076	WM442	WM340	0.105247	20.6693	2.3e-16	0.0506442	54166	38908	31498
MI3076	WM561	WM340	0.0978118	26.7649	2.3e-16	0.0471018	53723	38329	31499
MI3076	WM562	WM340	0.0993377	26.1138	2.3e-16	0.0480236	53850	38844	31824
MI3076	WM563	WM340	0.125224	22.4471	2.3e-16	0.0635416	41378	34550	26860
MI3076	WM340	WM579	0.0637186	12.5849	2.3e-16	0.0266235	57414	31944	28117
MI3076	WM340	WM580	0.0602205	11.6886	2.3e-16	0.0252544	57206	31831	28215
MI3076	WM340	WM581	0.0588864	12.1414	2.3e-16	0.0245973	57397	31711	28184
MI3076	XJ160	WM340	0.0946613	20.3989	2.3e-16	0.0456149	54249	38589	31915
MI3076	WM441	WM436	0.114424	31.4554	2.3e-16	0.0594372	54345	39839	31658
MI3076	WM442	WM436	0.107652	28.2771	2.3e-16	0.0549743	54949	38924	31358
MI3076	WM561	WM436	0.103423	34.5908	2.3e-16	0.0527566	54354	38387	31191
MI3076	WM562	WM436	0.105707	27.9424	2.3e-16	0.0540918	54420	38901	31463
MI3076	WM563	WM436	0.124396	30.0035	2.3e-16	0.0667305	42006	34316	26723
MI3076	WM436	WM579	0.00109216	0.28828	0.773132	0.000452476	58052	29790	29725
MI3076	WM436	WM580	0.00163033	0.472301	0.636712	0.00067789	57714	29797	29700
MI3076	WM436	WM581	0.00163039	0.453331	0.65031	0.000676935	57932	29796	29699
MI3076	XJ160	WM436	0.0984946	28.0789	2.3e-16	0.0502921	54923	38600	31678
WM441	WM442	MI3076	0.0147841	3.27802	0.00104537	0.0113168	62092	32158	31221
WM441	WM561	MI3076	0.0118144	2.36342	0.0181069	0.00831211	69725	29204	28522
WM441	WM562	MI3076	0.00458475	1.07212	0.283667	0.00349426	62456	31662	31373
WM563	WM441	MI3076	0.0673056	12.9486	2.3e-16	0.0481003	53298	27394	23939
MI3076	WM441	WM579	0.0628105	11.791	2.3e-16	0.0221695	74805	26955	23769
MI3076	WM441	WM580	0.0577836	11.3559	2.3e-16	0.0204124	74533	26745	23823
MI3076	WM441	WM581	0.0602119	12.8578	2.3e-16	0.0212493	74714	26817	23771
WM441	XJ160	MI3076	0.00899076	1.83875	0.0659516	0.00697129	61299	32377	31800
WM561	WM442	MI3076	0.00504723	1.02428	0.305705	0.00296182	85624	23995	23754
WM562	WM442	MI3076	0.0123928	2.91468	0.00356055	0.00764359	81853	25733	25103
WM563	WM442	MI3076	0.0766905	15.1574	2.3e-16	0.0578982	47997	29195	25036
MI3076	WM442	WM579	0.0672869	21.8194	2.3e-16	0.0236538	75519	26957	23558
MI3076	WM442	WM580	0.0648115	21.9238	2.3e-16	0.0228449	75223	26862	23592
MI3076	WM442	WM581	0.0638754	22.1485	2.3e-16	0.0224571	75459	26807	23588
XJ160	WM442	MI3076	0.0087093	1.76539	0.0774988	0.00418517	101263	19921	19577
WM562	WM561	MI3076	0.00739071	1.9909	0.0464924	0.00473783	77964	26375	25988
WM563	WM561	MI3076	0.0739431	20.4734	2.3e-16	0.0548393	49032	28387	24478
MI3076	WM561	WM579	0.0526951	11.3458	2.3e-16	0.0183952	74799	26150	23532
MI3076	WM561	WM580	0.0505805	9.41455	2.3e-16	0.0176727	74468	26015	23510
MI3076	WM561	WM581	0.0480021	10.4051	2.3e-16	0.0167272	74743	25926	23551
XJ160	WM561	MI3076	0.00173439	0.373172	0.70902	0.00103147	84919	24258	24174
WM563	WM562	MI3076	0.0705687	19.9958	2.3e-16	0.0526851	48505	28680	24899
MI3076	WM562	WM579	0.0558041	11.4066	2.3e-16	0.019554	75035	26554	23747
MI3076	WM562	WM580	0.0553246	11.689	2.3e-16	0.0194459	74716	26524	23743
MI3076	WM562	WM581	0.0555633	11.4468	2.3e-16	0.0195019	74944	26530	23737
WM562	XJ160	MI3076	0.00568538	1.45522	0.145608	0.00351903	81648	25649	25359
MI3076	WM563	WM579	0.0187795	3.95576	7.62916e-05	0.00680694	59222	21727	20926
MI3076	WM563	WM580	0.0146913	2.91544	0.00355192	0.00532105	58962	21549	20925
MI3076	WM563	WM581	0.0161442	3.36706	0.00075974	0.00586425	59233	21652	20964
WM563	XJ160	MI3076	0.0733767	17.0045	2.3e-16	0.0554086	48046	29103	25124
WM579	WM580	MI3076	0.0156275	2.07401	0.0380784	0.00217531	112928	9456	9165
WM579	WM581	MI3076	0.00449889	0.427128	0.669286	0.000619935	113288	9266	9183
MI3076	XJ160	WM579	0.0513959	12.4478	2.3e-16	0.018039	75545	26512	23920
WM581	WM580	MI3076	0.0109913	1.19861	0.230681	0.00155587	112220	9566	9358
MI3076	XJ160	WM580	0.0495219	11.3011	2.3e-16	0.0174034	75202	26396	23905
MI3076	XJ160	WM581	0.0502338	11.7288	2.3e-16	0.0176152	75403	26395	23870
MI375	MI377	MI605	0.00848194	1.55053	0.121013	0.00401135	42615	12187	11982
MI375	MI377	MI711	0.0117159	1.73322	0.0830564	0.00348139	84546	17314	16913
MI375	MI377	MI722	0.0105263	1.49093	0.13598	0.00324331	63349	12480	12220
MI894	MI375	MI377	0.00587748	1.17927	0.238289	0.00382576	38016	25500	25202
MI377	MI375	WM009	0.00533928	1.34506	0.178606	0.00329628	36025	33610	33253
MI377	WM056	MI375	0.00972921	1.89685	0.0578483	0.00804664	35349	33522	32876
MI375	MI377	WM329	0.0162489	3.52871	0.000417584	0.00616007	64982	25236	24429
MI375	MI377	WM330	0.0110509	2.68713	0.00720693	0.00417862	64710	25114	24565
MI375	MI377	WM340	0.0134235	2.74474	0.00605585	0.00537793	64224	25480	24805
MI375	MI377	WM436	0.0121493	2.23685	0.0252962	0.00516282	64419	25201	24596
MI377	WM441	MI375	0.0339871	6.4207	1.35649e-10	0.0279896	36520	34454	32189
MI375	MI377	WM442	0.000964721	0.184551	0.853581	0.000564427	36108	33721	33656
MI377	MI375	WM561	0.00361875	0.824204	0.409823	0.00220288	34766	33558	33316
MI377	MI375	WM562	0.00408628	0.808585	0.418754	0.00253536	35855	33541	33268
MI375	MI377	WM563	0.0273753	5.87522	4.22293e-09	0.0202509	28884	27509	26043
MI375	MI377	WM579	0.01604	2.80487	0.00503365	0.00441319	87118	17768	17207
MI375	MI377	WM580	0.0133501	2.0211	0.0432691	0.00368634	86885	17724	17257
MI375	MI377	WM581	0.0152479	2.27073	0.0231634	0.00419601	86876	17711	17179
MI377	MI375	XJ160	0.00632534	1.21107	0.225867	0.00370416	36339	33728	33304
MI605	MI375	MI711	0.0636576	12.6239	2.3e-16	0.029377	24372	16425	14459
MI605	MI375	MI722	0.0650228	9.69454	2.3e-16	0.0312086	17208	11187	9821
MI894	MI375	MI605	0.0108296	1.75996	0.0784143	0.00424261	45503	9614	9408
WM009	MI375	MI605	0.00921359	1.5891	0.112038	0.0046251	42854	13199	12958
MI375	WM056	MI605	0.0186561	3.52529	0.000423018	0.00938912	43799	13159	12677
MI605	WM329	MI375	0.209391	29.7779	2.3e-16	0.0994966	27651	22202	14514
MI605	WM330	MI375	0.214352	27.2854	2.3e-16	0.101968	27684	22372	14474
MI605	WM340	MI375	0.226713	33.1845	2.3e-16	0.107902	27800	22612	14254
MI605	WM436	MI375	0.220998	34.4211	2.3e-16	0.105195	27319	22492	14350
MI375	WM441	MI605	0.00633625	1.20961	0.22643	0.00314399	45119	12944	12781
MI375	WM442	MI605	0.000990325	0.145123	0.884613	0.000501572	42745	13140	13114
MI375	WM561	MI605	0.0019782	0.438988	0.66067	0.000994714	42845	12916	12865
MI375	WM562	MI605	0.00168647	0.368953	0.712163	0.000849536	42624	13067	13023
MI375	WM563	MI605	0.0114474	1.43022	0.152655	0.00579952	33281	10426	10190
MI605	MI375	WM579	0.0528789	11.537	2.3e-16	0.0228071	25551	16805	15117
MI605	MI375	WM580	0.053978	12.6585	2.3e-16	0.0233682	25459	16851	15125
MI605	MI375	WM581	0.0561087	11.3981	2.3e-16	0.0242457	25464	16865	15073
XJ160	MI375	MI605	0.00106944	0.171505	0.863827	0.000539832	42837	13105	13077
MI722	MI711	MI375	0.0410511	4.77318	1.81341e-06	0.00506053	62589	7012	6459
MI894	MI375	MI711	0.00254322	0.356326	0.721596	0.000628341	90430	13600	13531
WM009	MI375	MI711	0.0043931	0.850051	0.395297	0.00138846	84614	18519	18357
WM056	MI375	MI711	0.0150145	3.80976	0.0001391	0.00468091	86896	18354	17811
MI375	WM329	MI711	0.0612706	7.92569	2.22045e-15	0.0275088	52438	27705	24506
MI375	WM330	MI711	0.0577505	7.63415	2.26485e-14	0.0257066	52975	27428	24433
MI375	WM340	MI711	0.00528847	0.937292	0.348609	0.00227442	54175	25187	24922
WM436	MI375	MI711	0.0421146	10.2908	2.3e-16	0.017717	54706	25982	23882
WM441	MI375	MI711	0.00191078	0.385808	0.699639	0.000592066	88820	18090	18021
MI375	WM442	MI711	0.00823768	1.30703	0.191203	0.00261875	84380	18665	18360
MI375	WM561	MI711	0.00322964	0.633888	0.526154	0.00101468	84702	18172	18055
MI375	WM562	MI711	0.0027999	0.461366	0.644536	0.000885146	84417	18445	18342
WM563	MI375	MI711	0.0319781	7.02144	2.1958e-12	0.0102255	69036	15813	14833
WM579	MI711	MI375	0.0724334	7.29394	3.01092e-13	0.00828777	94130	9224	7978
WM580	MI711	MI375	0.0617123	6.51768	7.14049e-11	0.00695329	94192	8972	7929
WM581	MI711	MI375	0.0631844	7.34176	2.1072e-13	0.00718548	94123	9078	7999
[truncated: 1,277 more rows]

[truncated: 2 more sheets: Tab. S9 Dstat_Dmin, Tab. S10 TT-dating]
