# Supplementary material for: The evolutionary history of the field vole species complex revealed by modern and ancient genomes
Source: Research Square preprint supplement (doi:10.21203/rs.3.rs-4848610/v1), 2025-01-09
Supplement: Supplementary file 2 [file 84ce94054c23b6ed655f881e.docx]

**Supplementary Information to: The evolutionary history of the field vole species complex revealed by modern and ancient genomes**

Mateusz Baca1, Barbara Bujalska1, Danijela Popović1, Michał Golubiński1, Paulo C Alves2, Edouard Bard3, Claudio Berto4, Gloria Cuenca-Bescós5, Love Dalén6,7,8, Helen Fewlass9,10, Tatyana Fadeeva11, Jeremy Herman12, Ivan Horáček13, Magdalena Krajcarz14, Matthew Law15, Anna Lemanik16, Juan Manuel López-García17,18, Elisa Luzi19, Xabier Murelaga20, Ahmad Mahmoudi21, Marco Peresani22,23, Simon Parfitt24,25, Joana Pauperio26,27, Svetlana Pavlova28, Piroska Pazonyi29, Iván Rey Rodríguez17,30, Jeremy B Searle31, Joanna Stojak32, Tatyana Strukova33, Jan M Wójcik32, Adam Nadachowski16

1Centre of New Technologies, University of Warsaw, Warsaw, Poland 
2CIBIO - Centro de Investigação em Biodiversidade e Recursos Genéticos, Universidade do Porto, Vairão, Portugal 
3CEREGE, Aix-Marseille University, CNRS, IRD, INRAE, Collège de France, Aix-en-Provence, France 
4Faculty of Archeology, University of Warsaw, Warsaw, Poland 
5Aragosaurus-IUCA-Earth Sciences Dpt., University of Zaragoza, Spain 
6Centre for Palaeogenetics, Stockholm, Sweden 
7Department of Zoology, Stockholm University, Stockholm, Sweden 
8Department of Bioinformatics and Genetics, Swedish Museum of Natural History, Stockholm, Sweden 
9Department of Anthropology & Archaeology, University of Bristol, Bristol, UK 
10Department of Human Evolution, Max Planck Institute for Evolutionary, Leipzig, Germany 
11Mining Institute, Ural Branch, Russian Academy of Sciences, Perm, Russia 
12National Museums Scotland, Edinburgh, UK 
13Department of Zoology, Charles University, Prague, Czechia 
14Institute of Archeology, Nicolaus Copernicus University, Torun, Poland 
15School of Sciences, Bath Spa University, Bath, UK 
16Institute of Systematics and Evolution of Animals, Polish Academy of Sciences, Kraków, Poland 
17Institut Català de Paleoecologia Humana i Evolució Social, Tarragona, Spain 
18Departament d’Història i Història de l’Art, Universitat Rovira i Virgili, Tarragona, Spain 
19Department of Early Prehistory and Quaternary Ecology, University of Tübingen, Tübingen, Germany 
20Department of Geology, University of the Basque Country (UPV/EHU), Bilbao, Spain 
21Department of Biology, Urmia University, Urmia, Iran 
22Dipartimento di Studi Umanistici, Università di Ferrara, Ferrara, Italy 
23The Natural History Museum, London, UK 
24Institute of Archaeology, University College London, London, UK 
25A.N. Severtsov Institute of Ecology and Evolution, Russian Academy of Sciences, Moscow, Russia 
26HUN-REN-MTM-ELTE Research Group for Paleontology, Budapest, Hungary 
27Centro de Investigación Mariña, MAPAS lab, Universidade de Vigo, Vigo, Spain 
28Department of Ecology and Evolutionary Biology, Cornell University, Ithaca, USA 
29Mammal Research Institute, Polish Academy of Sciences, Białowieża, Poland 
30Institute of Plant and Animal Ecology, Ural Branch, Russian Academy of Sciences, Yekaterinburg, Russia

**Contents**

[1 Supplementary Figures 3](#_Toc171927393)

[2 Additional materials, methods, and results 11](#_Toc171927394)

[2.1 DNA extraction and library preparation 11](#_Toc171927395)

[2.2 Ancient DNA extraction 11](#_Toc171927396)

[2.3 Double-stranded library preparation 12](#_Toc171927397)

[2.4 Single-stranded library preparation 13](#_Toc171927398)

[2.5 Target enrichment of mtDNA 13](#_Toc171927399)

[2.6 Direct radiocarbon dating 14](#_Toc171927400)

[2.7 Phylogenetic analyses - testing the mitogenomic dataset 15](#_Toc171927401)

[2.8 Description of archaeological/palaeontological sites 17](#_Toc171927402)

[2.8.1 Czech Republic 17](#_Toc171927403)

[2.8.2 Hungary 18](#_Toc171927404)

[2.8.3 Italy 20](#_Toc171927405)

[2.8.4 Poland 23](#_Toc171927406)

[2.8.5 Russia 30](#_Toc171927407)

[2.8.6 Slovakia 32](#_Toc171927408)

[2.8.7 Spain 34](#_Toc171927409)

[2.8.8 United Kingdom 38](#_Toc171927410)

[3 Supplementary references 39](#_Toc171927411)

**List of Supplementary Figures**

Figure S1. Per-base error rates……………………………………………………………………………………..3

Figure S2. Location of ancient and modern samples with nuclear genomes sequenced…………………………..4

Figure S3. Results of leave-one-out analysis of directly radiocarbon-dated samples………………………..……4

Figure S4. The ADMIXTURE plots for K values ranging from 2 to 7…………………………………………….5

Figure S5. The cross-validation error for ADMIXTURE runs……………………………………………………..6

Figure S6. The optimal number of migration edges in TreeMix analysis determined using the OptM package…..6

Figure S7. Maximum Likelihood trees reconstructed in TreeMix…………………………………………………7

Figure S8. Populations split times estimated using TT method……………………………………………………10

Figure S9. PSMC plots scaled using a mutation rate of 8.7×10−9 substitutions per site per generation………….. 10

Figure S10. Second and third top admixture graph obtained using Admixture Bayes……………………………11

**List of Supplementary Tables**

**All tables are provided as a separate spreadsheet**

Table S1. Ancient samples used in this study, mtDNA mapping and consensus calling statistics, molecular age estimation

Table S2. Modern samples used in this study, mtDNA mapping and consensus calling statistics

Table S3. List of contigs identified in field vole reference genome as linked to chromosomes X or Y

Table S4. The best partitioning scheme of mitochondrial DNA

Table S5. Nuclear genome mapping statistics for ancient samples

Table S6. Nuclear genome mapping statistics for modern samples

Table S7. Details of direct radiocarbon dates

Table S8. Results of the Bayesian evaluation of temporal signals

Table S9. D-statistics calculated based on dataset of 860,300 transversions using Dsuit. Three versions are presented as outputted by Dsuit: Dmin, BABA and tree

Table S10. Populations split times estimated using TT method

# Supplementary Figures

**Figure S1**. Per-base error rates estimated using an outgroup (M. ochrogaster) and a “perfect individual” (WM009) in ANGSD 0.933 divided into substitution classes. The total error rate is provided next to the sample name.

**Figure S2.** Location of ancient and modern samples with nuclear genomes sequenced. Circles denote the localities of the modern and other symbols of ancient specimens. The colours correspond to those shown in Figure 1.

**Figure S3**. Results of leave-one-out analysis of directly radiocarbon-dated samples. The age of each directly dated sample was estimated in two replicates (green) using BEAST 1.101.5, and all other dated samples were used to calibrate the molecular clock and were compared to calibrated radiocarbon measurement (red). Dots indicate the median estimate, while whiskers denote 95% HPD interval or 94.5% probability range for estimated ages and radiocarbon dates, respectively.

**Figure S4**. The ADMIXTURE plots for K values ranging from 2 to 7.

**Figure S5**. The cross-validation error for ADMIXTURE runs with the number of ancestral components ranging from two to seven.

**Figure S6.** The optimal number of migration edges in TreeMix analysis was determined using the OptM package. (A) Percentage of variance explained and mean log likelihood. (B) DeltaM values based on the Evanno method.

**Figure S7**. Maximum Likelihood trees reconstructed in TreeMix with 0 to 8 migration edges (m). For each analysis, a heat map of the residual fit was plotted.

**Figure S8.** Populations split times estimated using TT method using a high coverage genome of single individuals from POR (WM581) and MED (WM330) lineages and two individuals from ST, representing STwest (FV396) and STeast (WM009) populations. The calculation was performed using whole genome genotypes filtered by depth and using mouse mutation rate (i), filtered by depth, genotype quality above 10 and by removing SNPs 5-bp from indels and using mouse mutation rate (ii) and filtered by depth and using common vole mutation rate (iii).

**Figure S9.** Demographic reconstruction of field voles using PSMC. The PSMC curve was scaled using a mutation rate of 8.7×10−9 substitutions per site per generation, and assuming two generations per year. The y-axis shows the effective population size and the x-axis shows the time in years on the log scale. Faded lines represent 100 bootstrap replicates.

**Figure S10**. Second and third top admixture graphs obtained using Admixture Bayes.

# Additional materials, methods, and results

## DNA extraction and library preparation

## Ancient DNA extraction

DNA extraction and the pre-PCR library preparation steps were performed in the dedicated ancient DNA laboratory at the LPCG. Two different extraction protocols were used; one described in Dabney et al. (2013) and the other in Rohland et al., (2018). In both vole’s teeth were thoroughly cleaned with ultra-pure water in a 2 ml tube, crushed with a pipette tip and incubated overnight in 1 ml of extraction buffer (0.5 M EDTA pH = 8.0; 0.5% N-laurylsarcosine; 0.1 mg Proteinase K) at 37°C with agitation. In ‘Dabney’ protocol after the incubation, the extraction buffer was combined with 13 ml of binding buffer (5 M guanidine hydrochloride and 40% isopropanol) and eluted through a MinElute silica column (Qiagen, Hilden, Germany). The silica suspension was washed twice with 750 µl of PE buffer (80% ethanol, 10 mM Tris-HCl pH 7.5), dried and eluted twice with 30 µl of pre-warmed EB buffer (Qiagen, Hilden, Germany). In ‘Rohland’ protocol, after the incubation 150 µl of the lysate was combined with 1.56 ml of binding buffer (5 M guanidine hydrochloride, 40% (vol/vol) isopropanol, 0.12 M sodium acetate and 0.05% (vol/vol) Tween 20) and 10 µl of silica magnetic beads (G-Biosciences; VWR International) and incubated for 20 min in rotator. The beads were washed three times with 250 µl of PE buffer (80% ethanol, 10 mM Tris-HCl pH 7.5) and dried for 20 min at room temperature. DNA was eluted from silica beads twice, each time with 15 µl of elution buffer (10 mM Tris-Cl, pH 8.0; 0.5M EDTA; 0.05% Tween-20) after 5 min incubation at room temperature.

## Double-stranded library preparation

The double-indexed, double-stranded sequencing libraries were constructed following the protocol of Meyer and Kircher (2010) with minor modifications described by Baca et al. (2019) using 20 µl of DNA extract as input. The blunt-end repair was performed in a 30 µl reaction containing 1× buffer Tango 15 U T4 polynucleotide kinase, 3U T4 DNA polymerase, 0.25 µM dNTPs, and 1 mM ATP (Thermo Scientific). The reaction was incubated for 15 min at 25°C, followed by 5 min at 12°C and 20 min at 95°C to inactivate the enzymes. An adapter ligation step was performed by adding 10 µl of the adapter ligation mix directly to the blunt-end repair reaction resulting in a final reaction volume of 40 µl containing 1× T4 DNA ligase buffer, 5% PEG-4000, 5 U T4 DNA ligase (Thermo Scientific) and 1 µM of the P5 and P7 adapters. The reaction was incubated for 30 min at 22°C and purified using magnetic beads. Adapter fill-in was performed by adding 20 µl of purified ligation product to 15 µl of the reaction master mix, resulting in a 35 µl reaction containing 9.6 U of BST polymerase (New England Biolabs, Ipswich, MA, USA), 1× Thermopol reaction buffer and 0.25 µM of the dNTPs (Thermo Scientific). The reactions were incubated in a thermocycler for 20 min at 37°C, followed by heat inactivation at 80°C for 20 min. The DNA libraries were amplified in three replicates in 25 µl reaction volumes containing 10 µl of adapter-ligated DNA, 1× AmpliTaq Gold 360 Master Mix (Thermo Scientific) and 0.2 µM of the P5 and P7 indexing primers under the following conditions: 95°C for 12 min, 19 cycles of 95°C for 30 s, 60°C for 30 s, 72°C for 1 min and 72°C for 10 min. Each indexing primer contained a 7-bp long index. The amplification replicates were combined and purified using magnetic beads. The libraries were visualised by 2% agarose gel electrophoresis and quantified with the Denoxiv spectrophotometer.

## Single-stranded library preparation

We prepared single-stranded libraries for specimens with poorly preserved DNA in which the enriched double-stranded libraries yielded very few target DNA molecules. Single-stranded library for samples extracted by the ‘Dabney’ protocol were prepared using ten microliters of DNA extract were combined with 19 µl of water and 1 µl of USER enzyme (New England Biolabs) and incubated for 1 h at 37°C. For samples extracted by the ‘Rohland’ protocol libraries were prepared with 29 µl of DNA extract and 1 µl of USER enzyme. Further steps strictly followed the protocol outlined by Gansauge et al. (2020). The appropriate number of PCR cycles was determined with qPCR using the Illumina Library Quantification kit before indexing (KAPA). Indexing PCR was performed in duplicate using AccuPrime™ *Pfx* DNA Polymerase (Thermo Scientific). Amplified libraries were combined, purified using magnetic beads and subjected to the target enrichment procedure (Section 2.5).

## Target enrichment of mtDNA

Target enrichment was performed to enrich the libraries with vole mtDNA. Hybridisation bait was produced using the DNA extracted from modern samples of the following vole species: common vole (*Microtus arvalis*), field vole (*Microtus agrestis*), root vole (*Alexandromys oeconomus*), narrow-headed vole (*Stenocranius gregalis*) and bank vole (*Clethrionomys glareolus*). Total genomic DNA was extracted from tissue fragments using the DNeasy Blood and Tissue Kit (Qiagen). The mitogenomes were amplified in four overlapping fragments using PrimeSTAR GXL DNA Polymerase (Takara Bio, Shiga, Japan). The amplification reaction was performed in 50 µl and comprised of 20–50 ng of genomic DNA, 1× PrimeSTAR GXL Buffer, dNTPs (200 µM each), 0.2 µM primers and 2.5 U PrimeSTAR GXL DNA Polymerase. The PCR conditions were 30 cycles at 98°C for 10 s, 55°C for 15 s and 68°C for 30 to 50 s depending on the target length. The PCR products were mixed in equimolar ratios and sonicated to a length of ca. 200 bp using the Covaris M220 sonicator. The sonicated DNA from various species was pooled and converted into DNA bait following the protocol reported by Maricić et al. (2010).

Target enrichment was performed in solution following the protocol of Horn (2012). Hybridisation was performed using the Oligo aCGH/ChiP-on-Chip Hybridisation Kit (Agilent Technologies, Palo Alto, CA, USA). Each reaction (50 µl) consisted of 12–15 µl pooled libraries (up to five libraries), 25 µl of 2× hybridisation buffer, 5 µl of blocking agent, 4 µl of blocking oligos (25 µM each) and 1–3 µl of DNA bait. The quantities of the pooled libraries and DNA bait were adjusted so that the library to bait ratio was 10 to 1. Hybridisation was carried out for 20–24 h at 65°C in a thermocycler. After the incubation, the hybridisation reaction was incubated for 20 min with 5 µl of streptavidin-coated beads (Dynabeads MyOne C1, Thermo Fisher) to immobilise the enriched libraries. The bead-immobilised libraries were washed five times with BWT buffer (see Horn 2012 for buffer composition), incubated for 2 min at 50°C with HWE buffer, washed once with BWT buffer, transferred to a new tube, washed once with TET and resuspended in 35 µl of TE buffer. To separate the enriched library from the bait, the mixture was incubated for 5 min at 95°C, the beads were collected on a magnet and the eluate was transferred to a new tube. The enriched library was amplified 15 cycles in three separate reactions of 20 µl each using Herculase II Fusion DNA polymerase (Agilent Technologies), which was purified using magnetic beads and subjected to the second round of hybridisation and amplification. Libraries from the ancient and modern specimens were never pooled in one hybridisation reaction. Multiple enriched library pools, either ancient or modern, were combined for sequencing ensuring that all P5 and P7 indices were unique in the pool, quantified using qPCR (Illumina Library Quantification kit, KAPA) and sequenced on the NextSeq550 at the CeNT UW NGS Core Facility using the 150 bp Mid Output kit and a 2 × 75 bp sequencing scheme. A custom Read1 primer was used for the single-stranded libraries, as described by Gansauge et al. (2020).

## Direct radiocarbon dating

Ten samples were selected for radiocarbon dating (Table S7). The collagen extraction and quality assessment were performed at the Department of Human Evolution at the Max Planck Institute for Evolutionary Anthropology (MPI-EVA, Leipzig, Germany) (lab code: EVA) following the protocol for <100 mg bone samples described in Fewlass et al. (2019). In brief, the samples were demineralised in 0.5 M HCl at 4°C. Demineralisation was stopped when CO2 effervescence had stopped, and the samples were soft (3–23 h). The samples were treated with 0.1 M NaOH for 15 min at room temperature to remove humic acids and then re-acidified in 0.5 M HCl. The samples were rinsed to a neutral pH with ultrapure Milli-Q water between each step. The samples were gelatinised in HCl at pH 3 on a heater block at 70°C until fully solubilised (2–12 h). The resulting gelatine was filtered to remove particles >80 µm (Ezee filters, Elkay labs, UK, cleaned by sonication in Milli-Q water for 20 min) and then ultrafiltered to concentrate the >30 kDa fraction (Sartorius VivaSpin Turbo 15 with 30 kDa molecular weight cut off) with pre-cleaned ultrafilters (Brock et al., 2007). Samples were freeze-dried for 48 h. Background bones (>50,000 years) of equal size were prepared and dated alongside the vole samples to monitor lab-based contamination.

The quality of the collagen extracts was assessed based on collagen yield as a percentage of the original bone weight (minimum requirement 1%). The elemental and isotopic ratios of the extracts (~0.5 mg) were measured at the MPI-EVA on a Thermo Finnigan Flash elemental analyser coupled to a Thermo Delta plus XP isotope ratio mass spectrometer. Stable carbon isotope ratios were expressed relative to Vienna PeeDee Belemnite, and stable nitrogen isotope ratios were measured relative to air (atmospheric N2) by using the delta notation (δ) in parts per thousand (‰). Analysis of internal (methionine δ13C = −28.14 ± 0.09 ‰ and δ15N = −6.51 ± 0.06 ‰ (1SD); in-house collagen MRG δ13C = −19.73 ± 0.1 ‰ and δ15N = 4.90 ± 0.15 ‰) and international standards (IAEA-CH-6 sucrose, δ13C = −10.45 ± 0.06 ‰; IAEA-CH-7 polyethylene, δ13C = −32.15 ± 0.04 ‰; IAEA-N-1 ammonium sulphate, δ15N = 0.43 ± 0.06 ‰; IAEA-N-2 ammonium sulphate, δ15N = 20.41 ± 0.04 ‰) measured in the same batch indicates an analytical error of <0.2‰ (1σ) for δ13C and δ15N. Collagen extracts were considered suitable for dating where the collagen yield was >1% and elemental values (C: 30%–45%, N: 11%–16%, C:N: 2.9–3.6) fell within established ranges of well-preserved collagen (DeNiro & Weiner, 1985; van Klinken, 1999; Guiry & Szpak, 2021).

The collagen samples were radiocarbon dated on an accelerator mass spectrometer (AMS) using two methods. Five samples were weighed into tin cups (ca. 3 mg collagen) and graphitised using the automated graphitisation equipment (AGE3; Wacker et al., 2010a) in the Lab of Ion Beam Physics at ETH-Zurich (Switzerland) and dated (using ca. 1 mg C) on a Mini Carbon Dating System (MICADAS) AMS (Synal et al., 2007) (AMS lab code: ETH). Oxalic acid standards and background collagen samples measured in the same session were used to calculate the age of the samples with BATS software (Wacker et al., 2010b). An external error of 1‰ was propagated in the error calculation of the samples. Another five samples were dated at the CEREGE in Aix-en-Provence, where small samples of collagen (ca. 300 ug collagen) were combusted to CO2 in an Elementar Vario Microcube elemental analyserand measured directly using a gas interface system coupled to the gas ion source of the AixMICADAS (Bard et al., 2015) (AMS lab code: Aix). The ages in Table S7 are a weighted mean of three replicate measurements containing ca. 100 ug C each, measured following the procedure for collagen samples described in Fewlass et al. (2017, 2019). The radiocarbon dates were calibrated in OxCal v4.4 (Bronk Ramsey, 2009) using the IntCal20 (Reimer et al., 2020) calibration curve.

## Phylogenetic analyses - testing the mitogenomic dataset

The full mitochondrial dataset comprised 83 ancient and 67 modern field vole sequences, among which 10 ancient samples were radiocarbon-dated. The sequences used in this study were aligned using MAFFT (Katoh & Standley, 2013). The alignment was visually inspected, variations in length around the nucleotide homopolymers were trimmed, and singleton indels were removed. We then used PartitionFinder v.2 (Lanfear et al., 2016) to select the most appropriate partitioning scheme and DNA substitution model (Table S4).

The BEAST 1.10.5 software (Suchard et al., 2018) was used to reconstruct phylogenetic relationships, estimate the divergence times of the field vole lineages, and age the non-directly dated specimens. In all analyses, we used seven data partitions, as suggested by PartitionFinder2, with unlinked substitution and clock models.

Bayesian evaluation of the temporal signal (BETS,(Duchene et al., 2020)) was used to determine whether the temporal signal within our dataset was sufficient to calibrate the molecular clock. In this analysis, we used 80 sequences: 70 from extant and 10 from directly radiocarbon-dated field vole specimens. The medians of the calibrated radiocarbon ages were set as the sequence sampling times. The support for the four models was compared. In the first two models, real sampling times were assigned to the sequences (heterochronous analysis), and either a strict clock or an uncorrelated relaxed log-normal clock (UCLN) was used. In the other two models, the same sampling time (i.e. isochronous analysis) was used for all sequences, and either a strict clock or the UCLN clock was applied. A constant population size tree prior to all analyses and a CTMC rate reference prior for the heterochronous datasets were applied (Ferreira & Suchard, 2008). Each analysis consisted of 50 million steps sampled every 5,000 steps, with the first five million steps discarded as burn-in. Convergence and stationarity were inspected using Tracer 1.7 (effective sample size; ESS >200 for all parameters). The log marginal likelihood (MLE) of each model was estimated using the generalised stepping-stone (GSS) sampling approach (Baele et al., 2016). The MLE calculation consists of 50 path steps, each run for one million iterations. Two replicates of each analysis were performed. The results are presented in Table S8. Model I, with real sampling times assigned to sequences and a strict clock, was decisively supported over Models II (2lnBF=161), III (2lnBF=2216), and IV (2lnBF=421), suggesting that our dated dataset is suitable for calibrating the molecular clock, and a strict clock model fits the data better than the UCLN clock model.

Next, we tested which tree prior best fits our dated dataset. A constant population size and Skygrid tree priors were compared using the GSS MLE. The analyses were conducted the same as for the BETS analysis, and ‘decisive’ support was found for the Skygrid tree prior (2lnBF=136).

Then, we performed a leave-one-out analysis of the directly dated specimens to determine the precision of the age estimates produced using the available calibration dataset. In this analysis, the age of each directly radiocarbon-dated specimen was estimated using the remaining directly dated and modern specimens to calibrate the molecular clock. We set a gamma prior (shape = 2; scale = 30,000) on the age of the directly dated specimen, whose age was to be estimated using the molecular dating approach and increased the operator weight of the age estimation to 5. We set a constant population size tree prior and used the CTMC rate reference prior. Each analysis was run in duplicate for 50 million generations sampled every 5,000 steps, and the first 5 million generations were discarded as burn-in. Convergence and stationarity were inspected using Tracer 1.7 (ESS >200 for all parameters).

## Description of archaeological/palaeontological sites

### Czech Republic

Ivan Horáček

**Bišilu Cave**

490 57' N 140 6' E

The site is located near Tetín, Beroun distr., at 250 m a.s.l., Bohemia. A cave entrance in a rocky cliff completely infilled by sedimentary sequence of soil colluvia, limestone debris and loess loam at base. Excavation in 2015-2017 revealed 16 different horizons (with total thickness > 3 m). Deeper part of the section (layers 4b- 8 covering period from 11 ka cal BP (layer 4b) to > 24 ka cal BP (data for layer 7a)) was particularly rich in fossils. 28 species of small ground mammals were recorded with total MNI=602. *Microtus arvalis* appeared in all layers together with *Microtus agrestis*, *Stenocranius anglicus (=gregalis), Chionomys nivalis, Alexandromys oeconomus, Lemmus lemmus, Cricetulus migratorius* or *Allactaga major* with peak abundance in layer 6 (16 ka cal BP).

**Býčí skála Cave**

49°18.44' N, 16°41.68' E

The site is located in Moravian karst, Blansko district, at 325 m a.s.l., comprising a stratigraphical section (21 stratigraphic horizons, total thickness 10 m) inside the entrance of Býči skála, one of the largest caves of the region. The excavation undertaken from 2007 to 2013 revealed a sequence of 9 lithological units contributed by debris sediments, soil colluvia partly and flowstone incrustations, representing 21 distinct stratigraphical subhorizons. About 5 tons of sediments were washed and a rich material of 52 mammalian spp. (4525 MNI), mostly small ground mammals (40 spp., MNI 2345) and bats (20 spp. MNI 1770), was obtained. The lower part of the section (layers 8a-9c) documents the Younger Dryas stage (communities with dominant contribution of *S. anglicus*, *M. agrestis* and *M. arvalis*)*,* the central part (layers 3a-7b) documents the Preboreal stage (greatly diversified communities with subsequently increasing contribution of woodland elements), and in the upper part (layers 0a-2b) the beginning of the Boreal stage (dominant contribution by *Apodemus flavicollis*). Nine 14C dates confirmed quite convincingly the biostratigraphic assessment: the lowermost layers dated to 12.1 ka cal BP, the uppermost one to 8.45 ka cal BP. The section is unique particularly in regard to the high resolution record of the dramatic course of community rearrangements during the earliest Holocene and robust proof of FAD of almost all demanding elements of the mid-European Holocene faunal history (including the taxa apochoric to central Europe) long prior to any anthropogenic influence. For further data see e.g. Horáček and Sázelová (2017).

### Hungary

Piroska Pazonyi

**Petényi Cave**

48°02’ N 20°25’ E

The site is situated at the Bükk Mts., at 680 m a.s.l. (Northern Hungary), at the southwestern part of the Bükk Plateau, in the wall of Peskő Hill. The 13 m long, 8 m wide and 3.0–3.5 m high rock shelter is the remain of a former more spacious cave. At the entrance of the cave, five Holocene (HI-V) and nine Pleistocene (P1–9) layers were unearthed down to 4.9 m depth (Vértes, 1956). From the Holocene, humus layers were collected a rich and interesting fauna as well as archaeological material from Hallstatt, Baden and Bükk cultures. In the case of the Pleistocene sequence, only at the top 10 cm thick layer (layer P1), were found abundant microfauna, and the lower layers were sterile or poor in bones. P1 and HV layers contained Epipalaeolithic and Mesolithic tools, therefore they represent the fauna of the Pleistocene-Holocene boundary. In the sequence of layers in Petényi cave a faunal change characterized by the decrease of S. anglicus, A. oeconomus, M. arvalis and an increase of Microtus (Terricola) subterraneus, C. glareolus, Apodemus sylvaticus can be observed. The lower limit of this change can be placed into Allerød oscillation, and the real great faunal change took place between the Allerød and Atlantic (Neolithic) layers (Jánossy and Kordos, 1976). Based on a new radiocarbon analysis of samples from the Petényi cave, the cave sequence exposes layers from 15,180 cal BP to 483 cal BP (layers P1-HI). Nevertheless, the sequence is incomplete and layers corresponding to the Pleistocene/Holocene boundary (between 14,000 and 9,500 BP) are missing from the profile (Sümegi and Náfrádi, 2015).

**Rejtek I Rockshelter**

48°03’ N 20°34’ E

Rejtek I Rockshelter is situated in the central Bükk Mountains, east of the village Répáshuta in a valley, approx. 534 m a.s.l. The rock shelter opens at the eastern slope of the valley (Jánossy and Kordos, 1976), at the north-western end of the Szarvaskő Hill. It is formed in the well-stratified Middle Triassic Répáshuta Limestone. Its entrance facing west lies 8-10 m above the valley-bottom. Its width is 9 m in N—S direction, its ceiling height 1.60 m, and the cavity penetrates 2.50 m into the parent rock. Behind the rock shelter there is a semi-circular lateral branch that has two entrances. Jánossy and Kordos (1976) gives a detailed description of the excavation trenches (I-II-III) and also describes the harmonization and renumbering of sediment layers obtained from different sediment trenches. The site was first excavated in 1957 followed by a second field campaign in 1958 (Jánossy, 1961). An exceptional value of the site is the availability of a detailed investigation on the charcoal remains by Stieber (1969) and its mollusc fauna analyses by Krolopp (Jánossy and Kordos, 1976) and Sümegi et al. (2012). Earlier studies furthermore emphasized that the sequence of layers in this rock shelter offers a great possibility to study the Pleistocene-Holocene transition of the vole fauna. The re-analysis of the mollusc fauna, including radiocarbon dating, and the charcoal material (Sümegi et al., 2012) suggested that sediment accumulation was nearly continuous from 13,000 14C years BP, with a break in the Younger Dryas until the Sub-Boreal. Magyari et al. (2022) results suggest that the bone assemblages are mixed in the Holocene layers, therefore we did not interpret faunistic changes in these sediment layers. During the Younger Dryas Magyari et al. (2022) did not find hiatus in the sediment, our age-depth model is continuous and several bones were dated to this period. The study of the archaeological finds identified a few undiagnostic artefacts from the Pleistocene layers and a Mesolithic trapeze from the Early Holocene (Vértes, 1965). July mean temperatures were also estimated by the vole thermometer method (Magyari et al., 2022): 200-220 cm = 13,085–14,157 cal BP = 17.2 °C 180–200 cm = 12,347–13,085 cal BP = 18.3 °C 160-180 cm = 11,549–12,347 cal BP = 17.3 °C 140–160 cm = 10,851–11,549 cal BP = 18.3 °C. There is no reconstruction above 140 cm in Block III (Jánossy and Kordos, 1976). Overall the vole thermometer suggests about 1°C fluctuation in July mean temperatures over the late glacial period, and generally 2–3°C lower warmest month mean temperatures than today (between 17.2–18.3°C).

### Italy

Claudio Berto, Elisa Luzi, Juan Manuel López Garcia, Marco Peresani

**Caverna degli Orsi/Medvedja jama**

45°36’ N, 13°51’ E

Caverna degli Orsi (San Dorligo della Valle - Dolina, Trieste, Friuli Venezia Giulia) is located at about 360 m a.s.l, on the northwestern slope of Monte Carso. Discovered in 1992 through a 11 m deep vertical passage, the cave is quite unique because the original entrance closed probably at the end of Late Pleistocene, keeping almost intact a paleosurface with the typical traces of the cave bear presence, such as hibernation dens (Boschian et al., 1998; Boschian and De Santis, 2011; Berto and Rubinato, 2013). The excavation campaigns were led by the University of Pisa and carried out between 1993 and 2004. Two trenches, denominated A and B, were open, one near the entrance slope (B) and the other one located about 15 m far from the original entrance (A). A few Mousterian flint artifacts were found in both trenches, suggesting a sporadic human presence in the cave during the Late Pleistocene. The large mammal assemblage of the two trenches is dominated by *Ursus spelaeus*, but it is rich in species such as *Panthera spelaea*, *Canis lupus*, *Capreolus capreolus* and *Capra ibex*. Among the small mammals, the most frequent species are *C. nivalis*, *M. arvalis*, *C. glareolus*, and *Dinaromys bogdanovi*, while rare elements attributed to *Sicista* sp. (*Sicista betulina* in Berto and Rubinato, 2013), *C. migratorius*, and *Mesocricetus* cf. *newtoni* are recorded. The field vole *M. agrestis* is recorded in both sequences, the material analyzed for this work comes from sequence B, layers 123 and 125. The specimen from layer 123 was initially recorded as *M. arvalis* (Berto and Rubinato, 2013) and then revised as *M. agrestis* (Luzi, 2018). No absolute dates are available yet, but the estimations based on the faunal assemblages, and the geoarchaeological analyses suggest that the sequences accumulated between the MIS 5 and MIS 2 (Berto and Rubinato, 2013).

**De Nadale Cave**

45º 26’ N, 11º 30’ E

De Nadale cave (Zovencedo, Vicenza, Veneto) is located at 130 m a.s.l. and opens to the south on a small cliff west-east oriented in the middle of the Berici Hills, a karst plateau in the sub-alpine region of northeastern Italy. Archaeological excavations started in 2013 and exposed a short stratigraphic sequence embedding a single Middle Palaeolithic anthropic layer (Unit 7) sandwiched by sterile levels. Unit 7 is formed by dark brown-grey silt loam with small-sized stones. In addition to a deciduous Neanderthal tooth (Arnaud et al., 2017), there is a large-mammal assemblage mainly composed of herbivores such as the giant deer (*Megaloceros giganteus*), red deer (*Cervus elaphus*) and bovids (*Bos primigenius* and *Bison priscus*) (Terlato et al., 2019; Livraghi et al., 2021), with scarce carnivores. Anthracological data from unit 7 suggest the human preferential use of spruce / larch (*Picea - Larix*) as firewood together with cryophilous pines (*Pinus* tp. *sylvestris*) and birch (*Betula* sp.) indicating prevailing harsh climatic conditions (Vidal-Matutano et al., 2022). Mousterian lithics and a huge quantity of bone tools have been attributed to the Quina Mousterian culture (Delpiano et al., 2022). Further, chronological data have been obtained by the uranium-series (U-Th) dating of a bison tooth, providing a minimum age of 70.2 +1/-0.9 ka for Unit 7 (Jequier et al., 2015). The micromammal data from Unit 7 have been published by López-García et al. (2018, 2019). The small mammals recovered from this unit total 201 identified specimens, corresponding to a minimum of 112 individuals, representing at least 13 taxa: 4 insectivores (*Talpa* cf. *T. europaea*, *Sorex* gr. *araneus-samniticus*, *S. minutus* and *Neomys* cf. *anomalus*); one bat (*Myotis* sp.) and 8 rodents (*Arvicola amphibius*, *M. arvalis*, *M. agrestis*, *M.* (*T.*) gr. *multiplex*-*subterraneus*, *C. nivalis*, *C. glareolus*, *A. sylvaticus* and *A. flavicollis*.

**Grotta della Ferrovia**

43°25’ N, 13°0’ E

Grotta della Ferrovia (Fabriano, Ancona, Marche) opens at 215 m a.s.l., on the southern side of Esino river, at the entrance of the Gola della Rossa, a deep gorge in the Central Apennines chain located in the Marche region. Several archaeological fieldworks were carried out between 1966 and 1972 under the direction of the Superintendency and of the University of Ferrara. Unfortunately, only the documentation of the 1966 campaign is available; in that year the investigated area consisted of 5 sectors located at the entrance. In that trench seven layers were identified (GDF1 to GDF7) and Upper Palaeolithic tools attributed to the first phases of the Late Epigravettian were found in all layers, excluding GDF1 (Bartolomei, 1966; Bartolomei and Cattani, 2005; Broglio and Lollini, 1981).

A recent revision of the small mammal assemblage recovered in 1966, together with direct radiocarbon dates on rodent mandibles and genetic studies on the *M. arvalis* material was published in Ceregatti et al. (2023). Across the sequence, from GDF7 to GDF5 *M. arvalis* is dominant over *M. agrestis* in a poorly diversified assemblage. On the contrary, from GDF4 to GDF2 *A.* gr. *sylvaticus-flavicollis* dominates in an assemblage with high number of taxa. Direct radiocarbon dates on 18 rodent bones and aDNA analyses on three *M. arvalis* teeth helped to better understand the signiﬁcance of the oscillation inferred from the small mammal sequences. A robust series of nine radiocarbon measurements from GDF7 to GDF5 shows that the lower part of the sequence accumulated between ~24,600-19,600 cal BP, which includes the ﬁnal phases of the Last Glacial Maximum (LGM). However, the radiocarbon dates of the upper part of the sequence (GDF4 to GDF2) are less consistent with their stratigraphic position probably due to post-depositional disturbances of the sediments. The field vole specimens analyzed in this work come from layer GDF5, dated between 21,742 to 19,643 cal BP.

**Grotta del Sambuco**

43°03’ N 10°53’ E

Located in central-western Italy (Pianizzoli, Massa Marittima, Toscana) at 280 m ca. a.s.l. In 2013, the excavation campaigns of the University of Siena revealed a sequence with three Late Pleistocene archaeological Stratigraphic Units (US). US 4 yielded a rich lithic tools complex (962 pieces) but very scarce related to final Epigravettian culture (Calattini et al., 2016) and dated at 13,615±75 BP (uncalibrated). US 5 was extremely rich in small mammals, with scarce lithic industries and numerous charcoals. In 2018, a human femur was recovered from this unit. The list of small mammals for this layers include *S.* ex gr. *araneus*, *S.* cf. *minutus*, *Myotis* sp., *A.* *amphibius*, *C.* *glareolus*, *M.* *agrestis*, *M*. *arvalis*, *M*. (*T.*) ex gr. *multiplex*-*subterraneus*, and *Apodemus* sp. (Luzi et al., 2022). Charcoals sample yielded an uncalibrated date of 19,160 ± 110 BP (23,365–22,903 cal BP). US 6 returned abundant small mammals, scarce lithic tools and large mammal rests (horse, wolf and red deer), and marine malacofauna (*Bittium*) (Calattini et al., 2019). The list of small mammals for this layers include *Erinaceus* *europaeus*, *Neomys* *anomalus*, *S.* ex gr. *araneus*, *S.* cf. *minutus*, *Talpa* sp., *Myotis* sp., *A.* *amphibius*, *C.* *nivalis*, *C.* *glareolus*, *M.* *agrestis*, *M*. *arvalis*, *M*. (*T.*) ex gr. *multiplex*-*subterraneus*, *Apodemus* sp., *Eliomys* *quercinus*, and *S.* *subtilis* (Luzi et al., 2022). US 6 was dated at 23,632 ± 150 BP (28,125–27,404 cal BP). The small mammal assemblages of US 5 and US 6 were dominated by the common vole *M.* *arvalis* (ca. 90% in both Units). The field vole *M.* *agrestis* represents the 1.78% of the assemblage in US 5 (MNI = 6), and the 3.02% in US 6 (MNI = 102).

**Cava a Filo**

44°26’34’’N, 11°22’47’’E

Cava a Filo (Croara, Bologna, Emilia Romagna) consists of a karst deposit found in an abandoned quarry at 256 m above sea level. The geological and palaeontological research carried out since 2006 has allowed the discovery of a complex of cavities and galleries that acted as a "trap" for the rich Late Pleistocene fauna (Paronuzzi et al., 2018). Radiocarbon dates show that the caves were filled during the Last Glacial Maximum and the large mammal assemblage is typical of that period, with high percentages of *Bison priscus* (over 70%), rare *Megaloceros giganteus* and *Capreolus capreolus*, while among the carnivores *Canis lupus* is recorded. The small mammal assemblage has a low diversity and is dominated by *Microtus arvalis* (about 70% of the MNI), other identified rodents are *Microtus agrestis*, *Arvicola amphibius*, one *Chionomys nivalis* and one *Apodemus* cf. *sylvaticus*.

### Poland

Adam Nadachowski, Claudio Berto, Magdalena Krajcarz, Anna Lemanik

**Cisowa Rock-overhang**

49°26’ N, 20°06’ E

The Rock-overhang in Cisowa Rock is located in the Cisowa Rock (685 m a.s.l.), Pieniny Klippen Belt, Western Carpathians, in a distance of 1,900 m from Obłazowa cave. In 2009 at the southern slope of this rock a very small rock-overhang, entirely filled with sediments, was discovered. In 2013 an excavation of 5 x 5 m square meters was opened, and the depth of the studied sediments reached ca. 50-60 cm (Nadachowski and Valde-Nowak, 2015). The stratigraphic sequence of the trench included three layers with small mammal assemblages and rare remains of larger mammals, birds and lower vertebrates. In total 3692 identified bones and teeth were found, which correspond to a minimum of 2006 individuals, representing at least 53 taxa. The rodent assemblage is dominated by *Dicrostonyx torquatus*, *S. anglicus* and *M. arvalis* (Lemanik et al., 2020). Faunal composition from layers II and III indicated cold climate condition and steppe-tundra environment. Layer I contained recent humus and the fossil assemblage of this layer is contaminated by the Holocene and recent fauna. Radiocarbon dating indicated that material from layer II was accumulated during the end of Late Pleistocene (GS-2a), about 17,000-16,200 years cal BP (Lemanik et al., 2020).

**Deszczowa Cave**

50°34' N 19°31' E

Deszczowa Cave, located in Kraków – Częstochowa Upland, southern Poland, was excavated in 1989–1997. Four sedimentary series and 11 layers were distinguished within the exposed profile. The sedimentation occurred from the late Saalian, probably to the beginning of the Eemian Interglacial (MIS 6 to MIS 5e), and after an erosional hiatus during MIS 3 and MIS 2 and the Holocene (Cyrek et al., 2000; Nadachowski et al., 2009; Krajcarz and Madeyska, 2010). The deepest layers (I, II and III) filled the narrow fissure of the cave bottom and were archaeologically sterile (Cyrek et al., 2000). The small mammal fauna from layers I, II and III includes the characteristic taxon *A. oeconomus/malei* (Nadachowski et al., 2009; Lemanik et al., 2022), also present in Biśnik cave, which is indicative in Poland for the late Middle Pleistocene (MIS 6). Layers I and II lay at the rocky bottom, and layer III fills up spaces between large limestone blocs situated below generation of flowstone dated by Th/U method to ca. 125 ka (+18 ka; - 20 ka). The rocky bottom of the cave (flowstone) was dated at ca. 210–217 ka (error ca. +ca. 40 ka / – ca. 34 ka) and some parts at > 350 ka. Therefore, layers I, II and III are older than Eemian but probably younger than MIS 8 (Saalian Complex). Dates (AMS, 14C) are available for the upperpart of the profile (Nadachowski et al., 2009; Lorenc, 2013). For a very short stratigraphic description, see Klimowicz et al. (2016). The fauna of rodents (NISP ca. 7800, MNI ca. 2020) consists of at least 20 species with distinct predominance of *S. anglicus, D. simplicior/torquatus* and *M. arvalis/agrestis* group in the upper part of the sequence and additionally with relatively abundant *L. lemmus* in Saalian/Early Vistulian layers (Nadachowski et al., 2009).

**Krucza Skała Rockshelter**

50°35’ N, 19°32’ E

The site excavated between 1989 and 1993 and in 2016 by K. Cyrek is situated in the central part of Częstochowa Upland, in the ridge of hills named Kroczyckie Rocks, at the northern slop of Łysak Hill, 340 m a.s.l. and ca. 20 m above valley bottom. The site is also known in the literature as “Rockshelter in Krucza Skała”. The stratigraphy and correlation between different profiles and zones (cave, overhang and shelter) (Cyrek, 1994 and his further papers; Madeyska, 1996; Nadachowski et al., 2009) is difficult (Krajcarz and Madeyska, 2022, Fig. 2.3). Most layers were deposited during Late Glacial and Middle to Late Holocene. Radiocarbon dates cluster in late part of GS-2 (Oldest Dryas), and boundary between GS-2 and GI-1, the onset of Bølling interstadial. The last cluster represents the late part of GS-1 (Allerød interstadial). Three dates correspond to the late prehistoric settlement, mostly the late Roman period and Middle Ages. Stone artefacts were attributed to the Late Magdalenian culture (Cyrek et al., 2022). One artefact, a small ornamented antler object, was classified as a part of half-round rod, a typical element of osseous inventory in the Magdalenian (Orłowska and Osipowicz, 2022). The Krucza Skała Rocksheler has yielded a large collection of faunal remains including numerous molluscs (Alexandrowicz, 2022), birds (105 species and 37 higher taxa) (Bocheński and Tomek, 2004; Nadachowski et al., 2022) and mammals (50 species and 7 taxa not determined to the species level) (Nadachowski et al., 2009, 2022). Fossil vertebrate remains from the rockshelter have also been used in ancient DNA (aDNA) studies of the Norway lemming (*L. lemmus*), European mountain hare (*Lepus timidus*), the willow and rock ptarmigan (*Lagopus lagopus* and *L. muta*) as well as Near Eastern wildcat (*Felis silvestris lybica*) (Lagerholm et al., 2014, 2017; Smith et al., 2017; Baca et al., 2018). Multidisciplinary research in Krucza Skala Rockshelter permitted the interpretation of the consecutive phases of human inhabitation of the site in relation to changes in the natural environment.

**Łabajowa Cave**

50°11’ N 19°46’ E

Łabajowa cave is located in the Będkowska Valley, in the southern part of the Polish Jura. It was first excavated by Römer in 1879, who provided an enigmatic description of combustion structures containing pottery and flint artefacts, among which a Jerzmanowician leaf point was recently rediscovered in the collection of the Archaeological Museum in Wrocław (Gryczewska et al., 2023). In 2020 a new trench of 3 m2 and 2.5 m deep was opened. The sequence consisted of the 19th-century trench fill (layers H1-H2), loess-like material with a high number of microvertebrate bones (H3-H6), a 250 mm thick blackish loamy layer with abundant charcoal remains (H8, H9 and H8’), and other loess-like layers (H10-H12) closing the excavated sequence. The bedrock was not reached during the fieldwork. Preliminary chronological and micromorphological data suggest that the Pleistocene sequence is the result of two separate depositional events (H3-H6 and H8-H12) separated by an erosion episode. The large mammal record is extremely scarce, but a lower jaw of *Equus ferus* was found in layer H4. The small mammals, still unpublished, consist of a recent and Holocene reworked assemblage in layers H1 and H2, including *M. agrestis*, *A. oeconomus*, *Apodemus* spp. and *Glis glis*. The small mammal assemblage of layer H3 is still influenced by some Holocene reworked elements and it is dominated by *A. oeconomus* and *M. agrestis*. In layer H4 these species are still present, but the assemblage is dominated by *D. torquatus* and *S. anglicus*. In the lower layers, the material is scarce, except in layer H9 where *D. torquatus* is absent while *M. agrestis* dominates with abundant *A. amphibius*, *C. glareolus* and *S. anglicus*.

**Mamutowa Cave**

50°10’ N 19°48’ E

Mamutowa Cave is located on the left slope of the Kluczwoda valley, about 20 meters above its floor. The entrance opens to the south-west. This cave site was investigated for the first time during the second half of the nineteenth century and subsequently in the early twentieth century yielding a rich and diverse Upper Palaeolithic assemblage (Zawisza, 1884; Kozłowski, 1922). Unfortunately, because of the recovery methods used at the time the cultural and stratigraphic context is unclear. The inventory includes a series of Aurignacian Mladeč points made from ivory, pendants and other mobile art objects. Their precise dating is unclear – only the Mladeč points have precise radiocarbon dates of around 40-35,000 cal BP (Wilczyński, 2016). The lithic inventory is a mix of Szeletian, Aurignacian and Gravettian artifacts (Kozłowski and Kozłowski, 1996). Gravettian occupation is indicated by the presence of double-platform blade cores (some of them microlithic), backed blades and numerous burins. Also, pendants discovered here made from mammoth ivory have analogies in finds from the Swabian Jura (Conard and Moreau, 2004). With the cave chamber damaged seriously by nineteenth-century fieldwork the excavation project carried out in the second half of the twentieth century by Stanisław Kowalski failed to secure the supplementary evidence (Gravettian and Aurignacian artifacts still resting *in situ*) needed to make a reliable attribution of the artifacts in the old series to these two cultural horizons (Kowalski, 2006). Nevertheless, this fieldwork did bring in a large Gravettian lithic inventory recovered from layer 2 formed by numerous burins and a small number of backed blades (Kowalski, 1967). Unfortunately, the same layer (no. 2) contained no osseous artifacts to confirm the attribution of the ivory pendants from earlier research to the same Gravettian inventory. Layer 2 is dated by radiocarbon dates obtained for the Pleistocene faunal remains to the period 35.0 ky – 11.0 ky uncal BP (Wojtal, 2007). The extremely broad scope and lack of dates for the osseous artifacts prevents us from linking them, if only tentatively, to the traces of Gravettian occupation discovered in the Mamutowa cave. As such, the cultural attribution of this inventory is unclear and it has been interpreted in the past variously as Gravettian or Epigravettian (Chmielewski, 1975; Kozłowski and Kozłowski, 1996). Preliminary analyses of small mammal remains from older excavations, including rodents, were undertaken by Nadachowski (1976, 1982). Currently, from 2022, new archaeological research is being carried out in the cave (conducted by the Archaeological Museum in Krakow and the Institute of Systematics and Evolution of Animals of the Polish Academy of Sciences in Kraków). They led to the discovery of the intact stratigraphy of the pre-cave terrace.

**Nad Tunelem Cave**

50°11’ N, 19°49 E

A small horizontal cave. The hole is located in the Korzkiwskie jet (near Ojców) in the Stodoliska Gorge. The cave has been known for a long time. The first mention comes from 1884 (Ossowski). The first plan and description were prepared in 1900-1901 by Stanisław Jan Czarnowski, who also conducted archaeological works there during those years, which resulted in the discovery of many archaeological artefacts (Czarnowski, 1926). The material included in our paper comes from research conducted by K. Sobczyk at the beginning of the XXI century. It provided sparse archaeological material including individual artifacts from the Neolithic, late Middle Ages and modern times, unfortunately unpublished so far. Four radiocarbon dates are available from the ‘grey’ and ‘yellow’ layers from which the studied materials originate ranging from ca. 12 to 10.5 ka cal BP (Baca et al., 2020).

**Obłazowa Cave (western entrance, WE)**

49°25’ N, 20°09’ E

Obłazowa Cave is located in the south-western part of the Obłazowa Rock in the Pieniny Klippen Belt, Western Carpathians. The site yielded a number of important archaeological inventories, the oldest anatomically modern human (*Homo sapiens)* remains in Poland as well as abundant and diversified fauna discovered in a series of sediments divided into 21 layers (e.g. Valde-Nowak et al., 1987, 2003; Trinkaus et al., 2014; Valde-Nowak and Nadachowski, 2014). The western entrance to the Obłazowa cave (OB WE) was discovered in 2009 and intensively explored in years 2015-2016. A 2 x 2 m trench was situated next to the rocky wall directed to the west which forms an overhang. The sediments were located close to the limestone wall, under the overhang, and partly on the slope. Its depth reached ca. 60-70 cm. The profile consists of three layers but faunal remains were found only in layers II and III. At the top of layer II, Late Magdalenian inventories and a fireplace were discovered (Valde-Nowak et al., 2018). An accumulation of sediments took place at the end of Late Pleistocene (GS-2a and GI-1e), ca. 17,000-14,000 years cal BP (Nadachowski and Valde-Nowak, 2015; Lemanik et al., 2020). The faunal assemblage is very numerous and diversified and comprises 15,053 identified fragments, which correspond to a minimum 5,509 individuals, representing at least 120 taxa, including amphibians, reptiles, birds as well as large and small mammals. Among small mammals (NISP/MNI = 9,775/4,928) the most numerous are *S. anglicus*, *D. torquatus*, *M. arvalis* and *M. agrestis* (Lemanik et al., 2020).

**Obłazowa 2**

49°25' N 20°09' E

Obłazowa 2 site is located in Obłazowa Rock, 50 m from the main entrance to the Obłazowa cave, Nowa Biała, Western Carpathians, southern Poland. It is an artificial shelter, approximately 7 m long and 3 m wide, with a large opening facing east. In the 1920s and 1930s, the eastern part of Obłazowa Rock was exploited as a quarry and an artificial cave was created. The shelter was established in a natural fissure (with an original width of approx. 0.5 m) developed at the contact zone between the crinoid limestone and red nodular limestone and filled with a large amount of sharp-edged limestone rubble and loamy clay which is intense brownish-red in colour. The fossil-bearing sediment contained regularly distributed sub-fossil bones and teeth. The rich fauna of vertebrates consisted of rare fishes, amphibians and reptiles and abundant remains of birds (38 taxa) and mammals (33 species) (total NISP=9490; MNI=4636) (Nadachowski et al., 1993). The faunal composition indicates a park-steppe and/or forest-steppe biomes, abundant in humid environments. The fauna was dated to the middle part of MIS 3. One date was obtained from a fox mandible: OxA-3696, 33,430 ± 1,230 BP) and two further dates (33,700±700 BP and 37,100±800 BP) from a mix of small mammal bones (Baca et al., 2023).

**Perspektywiczna Cave**

50°26’ N, 19°46’ E

Perspektywiczna cave is located in Udorka Valley in the middle part of Kraków-Częstochowa Upland, southern Poland (Sudoł et al., 2016; Krajcarz et al., 2016a; Baca et al., 2018; Gretzinger et al., 2019; Krajcarz et al., 2020a; Krajcarz et al., 2023). The cave includes two chambers connected by a gallery. Two entrances to the cave occur in a cliff of Upper Jurassic limestone, at an elevation of 340 and 345 m a.s.l. One entrance faces W; the other faces NW. The upper chamber is filled with Holocene series (layer C1), disturbed by animal burrowing, and gray and yellowish-brown loamy sands with limestone debris (layers C2 and C3) dated to MIS 3 on the basis of a rich series of radiocarbon dates of cave bear and cave hyena remains (Krajcarz et al., 2016a; Krajcarz et al., 2023). Sediments dated to MIS 3 are rich in coprolite fragments, gnawed and/or digested bone fragments, and remains of adult, senile and juvenile cave hyena individuals—an assemblage typical for hyena den deposits (Krajcarz et al., 2023). Remains of prey represent a number of large ungulates, including reindeer, woolly rhinoceros, steppe bison, giant deer, and mammoth. The lower chamber contains Upper Pleistocene and Holocene sediments with abundant animal bones and archaeological material. During the excavations of the lower chamber, nineteen archeological layers (1, A1, 2, A2, A3, 3, A4, 4, 5, 6, 7a, 7b, 7c, 8, 9a, 9b, 10, 11, and 12) were identified within a 4-m-thick sequence. The sediments of the lower chamber are dated to: the Late Glacial of the Last Glaciation (layers 9a, 9b), Lower Holocene (layer 8), and Middle to Upper Holocene (all other layers, including the colluvial series of re-deposited LGM to Middle Holocene material) (Krajcarz et al., 2023). The studied *M. agrestis* remains come from layer 7c. This is a colluvium situated between the Late Glacial and Lower Holocene series, composed of material dated to MIS 3 and re-deposited from the upper chamber (Krajcarz et al., 2023). Chronology of the lowest strata (layers 10, 11 and 12) is unknown.

**Shelter in Smoleń III**

50°26′ N, 19°40′ E

Shelter in Smoleń III is situated in southern Poland, in the middle part of Kraków-Częstochowa Upland. The entrance to the cave is located at 345 m a.s.l in the south-eastern part of a limestone hill, on the right side of Wodąca Valley. Entrances of the shelter are exposed to NE direction. The excavations were conducted in 2012–2013 and revealed the presence of long stratigraphic series of Late Glacial and Holocene sediments rich in animal bones and traces of human activity (Sudoł et al., 2015; Sudoł and Krajcarz, 2014; Sudoł et al., 2016; Krajcarz et al., 2020b). The near-entrance area and partially the sediments inside the shelter were excavated (Sudoł et al., 2015). The sequence of sediments has a relatively large thickness (up to 250 cm) and is composed of 12 lithologically variable layers (Sudoł and Krajcarz, 2014). Stratification is clearly readable inside the shelter (layers 1a, 2, 4, 5, 5a, 6, 7a, 8, 7b, 9, 10, and 11), but vaguely in the near-entrance zone and outside the entrance (layers 1, 3, 3a, 7, and 9). Chronology of layers 10 and 11 is unknown. The rich series of radiocarbon and luminescence dates (Sudoł et al., 2015, Krajcarz et al., 2016b; Sudoł et al., 2016, Baca et al., 2018, Krajcarz et al., 2020) indicates that the remaining part of the sequence accumulated since around 30 ka BP, and the major part was deposited continuously since around 14 ka BP until the modern times (Krajcarz et al., 2020b). The Upper Pleistocene series is composed of strata deposited during the LGM (layers 9 and 7b) and the Late Glacial of the Last Glaciation (layers 8, 7a). The Lower Holocene includes colluvial sediments (layers 6 and 5) and loams (layers 5a and 3a). Upper part of sequence is composed of stratified loams and limestone debris of Middle Holocene (layers 5a, 4) and Upper Holocene age (layers 2, 1 and 1a). Chronology of layer 3 is weakly established and possibly represents most of Middle and Upper Holocene. The upper portion of the sequence was disturbed by an archaeological feature (layer A), probably a medieval grave, cut in lower part of layer 1-1a and covered by the upper part of these layers. The feature contained human bones and was filled with mixed re-deposited material of older layers, mostly of layer 2, layer 4 and lower part of layer 1–1a (Sudoł et al., 2015; Krajcarz et al., 2020b).

**Żarska Cave**

50°09′ N, 19°42′ E

Żarska cave is located in the Żarski Gorge ca. 20 km northwest of the city of Kraków. The gully is a dry tributary to the Racławka Valley, which is one of several deeply entrenched valleys draining the south part of the Kraków-Częstochowa Upland. The cave is 143 m long and has a 23 m wide entrance which leads to a large, low chamber (Wojenka et al., 2011). The Żarska Cave provides an extraordinary sequence of Upper Pleistocene-Holocene cave deposits, containing both paleobotanical and paleontological data. During the excavations 18 layers were distinguished. The sediments are dated to early Late Glacial (layers 18-12), Allerød (layers 10-11), Early Holocene (layers 9-8), Middle Holocene (layers 7-6) and Late Holocene (layers 5-1). Basically, five principal phases of human occupation were identified, generally in two well-separated layers (Layer 6 and 1) (Wojenka et al., 2016). The entire sequence may be subdivided into three lithostratigraphic series. The lowermost one contains layer 19 and is characterized by a lack of sand and gravel fractions and high content of carbonate and organic matter (Fig. 3). The middle series contains layers 18-12, which are silty sediments with variable amount of limestone clasts, with traces of colluvial activity, and low content of carbonate and humus. The upper series contains layers 11-1, characterized by increased amount of sand, generally high carbonate and humus content, high amounts of limestone clasts, and smoothness of clasts. Radiocarbon dating indicates that layer 6 was accumulated between ca. 6,300 and 6,000 cal BP. The fauna of this layer indicates the presence of mixed and deciduous forests, and was deposited during warm and relatively humid climate (Wilczyński et al., 2020).

### Russia

Tatyana Fadeeva and Tatiana Strukova

**Cheremukhovo 1**

60°24' N, 60°03'E

Cheremukhovo 1, eastern slopes of the Northern Urals, was excavated in 1998–2000. Its entrance facing northwest is situated at the level of 5.5 m above the river flood plain, being 8 × 8.5 m in dimensions. The cave is 32 m long in total. The cave roof collapsed 11 m behind the roof dropping line along the distance of 12 m. Cave walls are pierced by holes and have numerous niches and grottos situated near the floor and higher, up to the level of 1.5–2.5 m above the floor. Four pits were made in the cave (Borodin et al., 2000). Pit 1 is located at the mouth of the cave. The deposits are represented by eleven lithological layers. Alluvial-speleogenic (layers 6-10) and speleogenic formations (layers 1-5) took part in the structure of the section. A series of dates (AMS, 14C) was obtained for the lower part of the profile. The sedimentation began in the second half of MIS 3 and continued during MIS 2 and the Holocene. For detailed description of the lithology, dating results, paleontological materials (Vertebrata remains) and palynological spectra (see Strukova et al., 2006). Pit 4 is located in a niche, which is a recess in the southeast wall of the cave. It is at a height of 1 m from the cave floor and 6 m from the drip line. The height of the niche at the entrance is 90 cm, width 5 m; the length of the niche in depth is 3 m. In the western part of the excavation is a narrow slot (80 cm deep), which probably has an exit to the surface (Bachura and Strukova, 2002). The deposits are represented by two lithological layers. Rodent remains are dominated by species forming the core of the Late Pleistocene faunas of northern Eurasia: *D. toruqatus*, *Lemmus sibiricus* and *S. anglicus*. The fauna was dated to MIS 2 (the radiocarbon date was obtained from Cricetidae bone remains: IEMAE-1259, 18,784 ± 379 cal BP).

**Mironovskaya Cave**

57°28 N, 61°43' E

Mironovskaya cave, eastern slope of the Middle Urals, was excavated in 2007. The entrance to the cave is at a height of 23 m above the river. The height of the entrance is 1.6 m, width - 3.5 m. The cave is well visible to the depth of 4 m. The mouth part of the cave is filled with sandy loams and sands with minor amounts of fine gravel. Seven layers were distinguished within the exposed profile. Sedimentation occurred during the Holocene. The stratigraphy of the cave and the complexes of small mammals are described by Rupysheva and Strukova (2010). Horizon 25 (layer 7) is estimated to 9,830 ± 130 BP by radiocarbon dating (Ki - 15492), horizon 20 (layer 6) – 5,340 ± 80 BP (Ki - 15494).

**Pershinskaya Cave 1**

57°26' N, 61°26' E

Pershinskaya 1 cave, placed on eastern slopes of the Middle Urals was excavated in 1995–1997. The entrance arch, 6 metres wide and 1.5 metres high, was oriented north-west; after 3-4 metres, the cave passage transformed into a fissure sloping down from left to right. Six layers were distinguished within the exposed profile. The stratigraphy of the cave and the complexes of small mammals are described in detail by Strukova (2000). Sedimentation occurred during MIS 2 and the Holocene. A series of radiocarbon dates were obtained for the lower part of the layer 6: the upper part was dated to 13,165 ± 55 BP (OxA – 20263) based on a sample from *Coelodonta antiquitatis* radius shaft (Stuart and Lister, 2012); the lower part was dated to 12,980 ± 240 BP SOAN-4542) based on Cricetidae bone remains. Layer 3 was dated to 7,380 ± 150 BP (SOAN-3824) by radiocarbon dating.

**Grotto Rasik**

59°04’16’’N 57°33’20’’E

The grotto is located 1 km north of the Rasik railroad station (Perm Pre-Urals). Investigations of the grotto sediments were carried out in 1999 (Fadeeva et al., 2000). The upper part of the sediments (conventional horizons 1-14) was formed in the Holocene and mainly contains bone remains of forest (*Craseomys rufocanus, C. glareolus, C. rutilus, Sciurus vulgaris, S. betulina, M. agrestis*) and intrazonal species (*A. oeconomus, A. amphibius*) of rodents. Deposits of horizons 15–18 were formed at the early Holocene and are characterized by a sharp predominance of *S. anglicus* bones (55.8–74.1%). Remains of *D. torquatus* dominate in most horizons (19–33) of the Late Pleistocene sediments. In addition, bones of horse, saiga, red deer, woolly rhinoceros, mammoth, cave bear and cave lion have also been found here. The age of some sediments was determined by radiocarbon dating (from 11,060 ka BP (horizon 17) to 13,330 ka BP (horizon 27) (Fadeeva et al., 2000, 2022).

### Slovakia

Ivan Horáček

**Dzerava skala Cave**

48°30'N 170 19'E

The site is located in Malé Karpaty Mts., 410 m a.s.l., southwest Slovakia. A spacious cave entrance has been recently excavated in 2002–2003 by Kaminská et al. (2005). With nine layers, the section and abundant faunal remains (small mammals MNI=2013) documented faunal development from ca 50 ka to 25 ka BP (18 14C data from 28,865 to 53,305 cal BP). The samples analysed in this paper originated from layers 3 and 4, representing early MIS2 to late MIS3 (two 14C data from 28,265 to 31,033 cal BP). The mammal fauna (MNI 480 and 369) was dominated by *M. arvalis* (27.1%), followed by *S. anglicus, Dicrostonyx* sp., *A. oeconomus, C. nivalis, Ochotona pusilla, Lepus* sp., *S. araneus* and 16 species with recedent representation. For details, see Horáček (2005).

**Muráň 3 (Muráňská Cave)**

49°14'N, 20°10'E

The site is located in High Tatras Mts., Kežmarok distr., 1560 m a.s.l., N. Slovakia. A stratigraphic section (2.5 m thickness, 6 layers) in entrance series of Muráňská cave, situated at foot of rocky wall of Muráň Mt. in Belanské Tatry (1890 m a.s.l.). The section revealed a series of horizons formed by coarse limestone clastics and cryogenic drit infilled, particularly in deeper layers, with a light ochraceous eolic dust loam. The lithological analysis of the section indicated no traces of postsedimentary disorder and the series can be considered intact and reliable in the stratigraphical respects. In total about 10, 000 bone remains were analysed providing 292 MNI of at least 30 species of vertebrates mostly small ground mammals (17 spp., MNI 238) and bats (7 spp., MNI 30). Four AMS 14C data (based on bone tissue) are available from layers 6 (24,368 ± 335 cal BP), 4 (16,314 ± 427 cal BP), 3 (12,839 ± 84 cal BP) and 1 (13,480 ± 118 cal BP). The richest assemblage (MNI 129; 21 mammalian and 6 mollusc spp.) was obtained from the layer 3: in its species composition and dominance structure it resembles the community of layer 1 (which closely resembles the present-day local communities), but it differs in having higher percentages of the forms indicating aquatic and semiaquatic habitats (*A. terrestris, M. agrestis, N. fodiens,* *S. minutus, Rana temporaria*), the elements of the alpine zone including debris field uncovered by tree vegetation (*C.* *nivalis, S.* cf. *betulina, M.* *arvalis, Microtus tatricus*), and last but not least in a recedent appearance of the glacial elements such as *S. anglicus , Dicrostonyx* sp. and *Lemmus* sp. Such characteristics suggest a picture of proluvial deglaciation marshes in the valleys and a mosaic of semiopen habitats on slopes, which can be expected there during the earliest Holocene. Also, the appearance of *Sicista* sp., *Muscardinus avellanarius* as well as the first appearances of *A. flavicollis* and *Pipistrellus pipistrellus* fit the faunal characteristics of the earliest Holocene in the Slovakian Carpathians quite perfectly. In deeper layers these elements were absent, and the respective communities are characterized by significantly lower diversity and predominance of the open ground elements typical of glacial communities, *S. anglicus, M. arvalis,* *D. torquatus* and *Lemmus* sp. These characteristics are particularly pronounced in the community of the deepest layer, layer 6, dated just in the time of LGM. Yet, even there the community included, though in low percentages, demanding forms such as *S. araneus, C. glareolus* (indicating a woodland habitat) and even *M. tatricus*, the endemic species of alpine habitats of the Western Carpathians. For further details see Horáček et al. (2015).

### Spain

Juan Manuel López Garcia, Gloria Cuenca-Bescós,Xabier Murelaga, Iván Rey-Rodriguez

**Artazu VII**

43°4’N, 2°31’E

Artazu VII site is a fossiliferous deposit, which was accidentally discovered in 2012 after a following basting in Kobate Quarry, Arrasate, Gipuzkoa, 70 km to the southwest of Donostia-San Sebastián, northern Spain and one year later, in 2013, excavated in an emergency excavation by Mari Jose Iriarte and Alvaro Arrizabalaga (Suarez-Bilbao et al., 2016, 2017 and 2018). The site is located at 351 m a.s.l. Although a large part of the site was destroyed during the blasting, it was possible to collect some in situ material (Suárez-Bilbao et al., 2016). In the structure of the preserved site, three different areas, but no levels, were differentiated, named, from top to bottom, Upper Ledge, Lower Ledge and Chamber. In total 50 taxa have been identified, 24 of them belonging to small vertebrates (13 mammals, seven amphibians and four reptiles), 14 to large mammals (four ungulates and ten carnivores) and 12 to avifauna. The rodents association includes the following seven taxa: *A. sylvaticus-flavicollis*, *A. amphibiu*s, *A. sapidus*, *M. agrestis*, *M. arvalis*, *M. (Terricola)* sp. and *Pliomys lenki* (Suárez-Bilbao et al., 2017). A humid habitat with a predominance of grassland and broadleaf forests, with some practically permanent water sources, has been inferred on the basis of faunal composition. The absence of species characteristic of cold climates and the large number of indicators of a relatively warm climate (e.g., the presence of the genus *Apodemus*) show that the atmospheric temperature was relatively similar to present conditions (Suarez-Bilbao et al., 2016, 2017 and 2018). The AAR dates of 98.4 ka and 88.5 ka, obtained for bone samples from Layers L and K in the Lower Ledge, suggest an attribution of Artazu VII to the first half of the Late Pleistocene, in the MIS 5c substage (Suarez-Bilbao et al., 2016, 2017 and 2018). Artazu VII is one of the few Pleistocene sites belonging to MIS 5c in the Iberian Peninsula.

**Cova Eirós**

42°45’ N 7°13’ E

Cova Eirós is an archaeological site situated in the vicinity of Cancelo, Triacastela (Lugo), in northwestern Iberia, Spain, at an elevation of 785 m a.s.l. and 25 m above the Arroyo de Bezcas stream. The Cova Eirós karst system is placed in the Cándana Limestone Series, which was formed during the Lower Cambrian period. The cave spans a length of 312 m. The entrance, where the Paleolithic groups settled, currently measures 2 m in height and 3.5 m in width, narrowing after the first 7 meters into a 15-meter-long neck (de Lombera-Hermida et al., 2021; Rodríguez Álvarez et al., 2011). The cave entrance contains an excavated sedimentary succession up to *c.* 1,6 m thick. From the surface of the sedimentary infill to the lower level of the present excavated succession, several levels were defined (A, B, 1, 2, 3, 4 and 5) among different facies were identified. Several Radiocarbon and OSL dates are available for this stratigraphic sequence with a chronology around 41 kyrs cal BP for Level 3 (with a lithic assemblage attributed to the Late Middle Palaeolithic). For Level 2 (ascribed to the Early Upper Palaeolithic), the OSL date provided a value of 32,787 ± 2,478 BP (MAD-5611BIN), consistent with the radiocarbon data (Beta–254280). The latter, gives us a chronological range for the Level 2 occupations between 36,136–35,032 cal BP (95.4%), placing them between GIS 7 and 6 of MIS 3. For more details see Lombera-Hermida et al. (2021). The faunal assemblage is dominated by carnivores due to the significant presence of *Ursus spelaeus*, *U. arctos*, *Panthera pardus*, *Lynx pardina*, *C. lupus, Meles meles* and *Vulpes vulpes*. Herbivores are represented by *C. antiquitatis*, *E. ferus*, *Capreolus capreolus*, *C. elaphus*, *B. priscus*, *B. primigenius*, *Capra pyrenaica* and *Rupicapra rupicapra*, along with lagomorph remains (*Oryctolagus cuniculus* and *Lepus europeus*), among others. Additionally, ichthyofaunal remains (*Salmo trutta*) have been recovered. Regarding the small vertebrates, at least 18 taxa have been identified: 1 frog (*R. temporaria*), 1 snake (*Vipera* sp.), 4 insectivores (*S. minutus*, *Sorex* sp., *Talpa* cf. *occidentalis*, and *Erinaceus europaeus*), 4 bats (*Myotis myotis*/*blythii*, cf. *Miniopterus* sp., *Myotis* sp., and *Rhinolophus ferrumequinum*), and 8 rodents (*A. sylvaticus*, *A. amphibius*, *A. sapidus*, *C. nivalis*, *Microtus* (*Terricola*) *lusitanicus*, *M. agrestis*, *M. arvalis*, and *A. oeconomus*) (Rey-Rodríguez et al., 2016).

**El Mirón Cave**

43°14′ N, 3°27′ W

El Mirón is a large cave in the western cliff side of Monte Pando (1000 m, 260 m a.s.l), a mountain that contains other Upper Palaeolithic sites (European Datum ETRS89). The mountain is in the upper Ason River Valley of the Cantabrian Cordillera of northern Spain and dominates the confluence of the rivers Calera and Gándara with the Asón (Cuenca-Bescós et al., 2012; Alfaro-Ibáñez et al., 2023). The cave sediments form a long stratigraphic sequence radiocarbon-dated by almost 80 assays between 41,000 and 2,500 BP. Archaeological excavations since 1996 have revealed a sequence with levels attributed to the late Mousterian, Gravettian, Solutrean, Initial, Lower, Middle and Upper Magdalenian, Azilian, Mesolithic, Neolithic, Chalcolithic and Bronze Age periods and Medieval traces. Thus, the cave has been used fairly continuously by humans (albeit with hiatuses), at least since the Mousterian. The cave was also a burial place, with one of the most exceptional finds of the first partial and secondary burial of the Lower Magdalenian age ever made in the Iberian Peninsula (Iriarte-Chiapusso et al., 2015; Hopkins et al., 2021; Alfaro-Ibañez et al., 2023 and literature therein). Arvicolinae rodents from El Mirón Cave belong to 11 species: *M. arvalis*, *M. agrestis*, *M.* (*T.*) *lusitanicus, M.* (*T*.) *pyrenaicus, C. nivalis, A. oeconomus, S. anglicus, A. amphibius, A. sapidus, P. lenki and C. glareolus* (Alfaro-Ibañez et al., 2023).

**El Portalón Cave**

42°20’ N 3°32’ W

The site of El Portalón represents the present-day entrance to Cueva Mayor, located in the Sierra de Atapuerca (Burgos, Spain), which has been used as a habitat on an intense and reiterated basis by the communities that have occupied the Arlanzón Basin at least since recent prehistory. The first work was carried out by G. Clark in 1972 (Clark, 1979), who brought to light an interesting sequence from the Bronze and Iron Ages and the existence of important ancient activities. The work of J. M. Apellániz of the University of Deusto was undertaken between 1973 and 1982, and although his results were never published he showed that there was intense occupation of the area during the Bronze Age (Apellániz and Domingo, 1987; Mínguez, 2005). The Sierra de Atapuerca sites research team took up these studies again in 2000, noting the mining techniques employed in the former excavation described by Clark. This involved a shaft of roughly 2–2.5 m diameter and more than 10 m depth, which made it possible to study a broad stratigraphic sequence of two main sedimentary units. The upper unit displays a Holocene chronology and is influenced by human activity (levels 1–9), a consequence of the considerable intensity of the human occupations in the enclave during the Neolithic and the Metal Age. The top of this unit includes the Bronze Age sequences discovered by the teams led by Clark and Apellániz (Ortega et al., 2008 a, b). The lower unit represents the Pleistocene sequence of the site of El Portalón. It is identified with level 10, a sedimentary unit 360 cm in thick and subdivided into 16 sublevels (P1–P16), subject of this study and characterized by natural processes of embedding of clasts within a clayey matrix, the absence of organic material, and an orange coloration. Particularly noteworthy is the presence of macromammal remains and an abundant set of microvertebrate remains, providing the unit with a significant palaeontological character, while it records the weak presence of human activity represented between sublevels P8 and P15, the deposits of which have provided small chips stemming from remains of carvings in flint and quartzite. In chronological terms, this lower sedimentary unit, or level 10, belongs to the final third of the Late Pleistocene. The top of the sequence (sublevel P1) has been dated at 16,890+/-80 BP (Beta-209452) by means of 14C AMS, whereas sublevel P11 has been dated at 30,300+/-190 BP (Beta-212190). The small vertebrates of El Portalón comprise at least 25 species (López-García et al., 2010): 4 amphibians (*Alytes obstetricans, Bufo bufo, B. calamita* and *R. temporaria*); 3 squamates (an indeterminate small-size lacertid, an indeterminate large colubrine and *Vipera* sp.); 6 insectivores (*S.* gr. *coronatus-araneus*, *S. minutus*, *N. fodiens*, *N. anomalus*, *T. europaea* and *Galemys pyrenaicus*); 2 bats (*M. myotis* and *M.* gr. *myotis-blythii*); 10 rodents (*M. arvalis*, *M. agrestis*, *A. oeconomus*, *Microtus* (*Iberomys*) *cabrerae*, *C. nivalis*, *M.* (*T.) duodecimcostatus*, *A. sapidus*, *A. amphibius*, *A. sylvaticus* and *E. quercinus*).

**Valdavara 1 Cave**

42°51’ N 7°09’ W

The cave of Valdavara 1 is located in the westernmost part of Spain, in the province of Lugo (at approximately 600 m above sea level). From a geological point of view, the cave belongs to the domain of Manto de Mondoñedo, one of the units making up the Western Astur – Leonese Zone, which in turn forms part of the Iberian Massif. This area is made up of formations from the early Palaeozoic, with a predominance of sandy and slaty rocks, though the presence of calcareous formations is notable. The cave of Valdavara opens into the limestones of the early-middle Cambrian (‘‘Calizas de Vegadeo’’), which outcrop along a broad strip running NNW-SSE. It is a unique formation in terms of its lithology, which comprises dolomites and limestones. The fossiliferous content of the levels lying below and above it suggests its attribution to the early Cambrian, although its upper levels might reach the middle Cambrian (Vera, 2004). The cave is located on the right bank of the River Narón, one of the tributaries of the Navia, at a height of some 120 m above the present river-course. It is a small cave that opens towards the north-east, with an entrance just 1.2 m wide and 1.6 m high which leads into a hall measuring roughly 5 by 3 m, the far end of which branches into two galleries that are short due to the sedimentary filling that progressively silts them up. The first excavation campaign at Valdavara-1 in 2007 revealed two sedimentary units: an upper one, 30 cm-thick, composed of two layers (levels 2 and 3) that have yielded fragments of ceramics characteristic of the Recent Prehistory (with a radiocarbon age of 4,490 ± 40 years BP for level 2), and a lower one (levels 4 to 6), 90 cm-thick. The lower unit is separated from the upper one by an erosive discontinuity and is late Pleistocene in age (radiocarbon dating between 13,770 ± 70 and 15,120 ± 70 years BP) (Vaquero et al., 2009). The small vertebrates of the Valdavara-1 cave comprise at least 34 species (López-García et al., 2011): 6 amphibians (*Chioglossa lusitanica, Salamandra salamandra*, *Discoglossus* cf. *galganoi*, *B. bufo*, *Rana iberica* and *R.* cf. *temporaria*); 9 squamates (*Chalcides striatus*, *Timon lepidus*, indeterminate small lacertids, *Anguis fragilis*, *Natrix maura*, *N. natrix*, *Coronella austriaca*, *Malpolon monspessulanus* and *Vipera* sp.); 5 insectivores (*Erinaceus europaeus*, *Crocidura russula*, *Sorex* sp., *S. minutus* and *Talpa occidentalis*); 2 chiropterans (*Rhinolophus* sp. and *M. nattereri*); 12 rodents (*M. arvalis*, *M. agrestis*, *M.* (*T.*) *cabrerae,* *M.* (*T.*) *lusitanicus*, *C. nivalis*, *C. glareolus*, *A. sapidus*, *A. amphibius*, *A. sylvaticus*, *Micromys minutus*, *G. glis* and *E. quercinus*).

### United Kingdom

Simon Parfitt and Matthew Law

**Sedrup Farm**

51°48′ N, 0°50′ W

Pleistocene deposits at Sedrup Farm, Aylesbury, Buckinghamshire, were investigated in 2019 and 2022, in advance of construction works for the High Speed Two railway link connecting London and the West Midlands. The site is situated approximately 70 km northwest of London, on low-lying ground with small streams that feed into the Thame River, a tributary of the Thames. The superficial sediments include a discrete, well-sorted sand deposit with its surface 0.65m beneath the present ground level. This deposit contained numerous terrestrial snail shells, as well as bones and teeth of small mammals and the remains of other small vertebrates. The assemblage from the 2019 investigation included northern vole (*A. oeconomus*) and narrow-skulled vole (*S.* *anglicus*), as well as abundant anuran remains, including natterjack toad (*Epidalea calamita*). At present, no direct dates have been obtained on the remains. The presence of a Postglacial component of woodland/shaded mollusc species suggests a potential intrusive contribution to the assemblages.

# Supplementary references

Alexandrowicz, W.P. (2022). Late Glacial and Early Holocene molluscan succession from Krucza Skała Rockshelter. In: Cyrek K., Sudoł-Procyk M., Czyżewski Ł. (eds). Late Magdalenian Campsite at Krucza Skała Rockshelter, Nicolaus Copernicus University, Toruń, 117 – 137.

Alfaro-Ibáñez, M.P., Cuenca-Bescos, G., Bover. P., González Morales. M., Straus, L.G. (2023). Implications of population changes among the Arvicolinae (Rodentia, Mammalia) in El Mirón Cave (Cantabria, Spain) for the climate of the last c. 50,000 years. *Quaternary Science Reviews*, **315**, 108234.

Apellaniz, J.M., Domingo, D. (1987). Estudios sobre Atapuerca (Burgos): II. Los materiales de superficie del Santuario de la Galería del Sílex. Cuadernos de Arqueología de la Universidad de Deusto 10, Bilbao.

Arnaud, J., Benazzi, S., Romandini, M., Livraghi, A., Panetta, D., Salvadori, A.P., Volpe, L., Peresani, M. (2017). A Neanderthal deciduous human molar with
incipient carious infection from the Middle Palaeolithic De Nadale cave, Italy. *American Journal of Physical Anthropology*, **162,** 370-376.

Baca, M., Popović, D., Panagiotopoulou, H., Marciszak, A., Krajcarz, M., Krajcarz, M.T., Makowiecki, D., Węgleński, P., Nadachowski, A. (2018). Human-mediated dispersal of cats in the Neolithic Central Europe. *Heredity*, **121**, 557 – 563.

Baca M, Popović D, Lemanik A, Baca K, Horáček I, Nadachowski A. (2019) Highly divergent lineage of narrow-headed vole from the Late Pleistocene Europe. Sci. Rep., 9(1), 17799.

Baca M, Popović D, Baca K, Lemanik A, Doan K, Horáček I, López-Garcia JM, Bañuls-Cardona S, Pazonyi P, Desclaux E et al. (2020). Diverse responses of common vole (*Microtus arvalis*) populations to Late Glacial and Early Holocene climate changes – Evidence from ancient DNA. Quat. Sci. Rev., 233: 106239.

Baca, M., Popović, D., Lemanik, A., Bañuls-Cardona, S., Conard, N.J., Cuenca-Bescós, G., Desclaux, E., Fewlass, H., Garcia, J.T., Hadravova, T.,Heckel, G., Horáček, H., Knul, M.V., Lebreton, M., López-García, J.M., Luzi, E., Marković, Z., Mauch Lenardić, J., Murelaga, X., Noiret, P., Petculescu, A., Popov, V., Rhodes, S.E., Ridush, B., Royer, A., Stewart, J.R., Stojak, J., Talamo, S., Wang, X., Wójcik, J.M., Nadachowski, A. (2023). Ancient DNA reveals interstadials as a driver of common vole population dynamics during the last glacial period. *Journal of Biogeography*, **50**, 183 - 196.

Bachura, O.P., Strukova, T.V. (2002). Mammal Remains from the Cheremukhovo-1 Site (Excavation 4),” in Fauna in the Urals during the Pleistocene and Holocene (Universitet, Yekaterinburg), pp. 37–55 [in Russian].

Bard, E., Tuna, T., Fagault, Y., Bonvalot, L., Wacker, L., Fahrni, S., & Synal, H. A. (2015). AixMICADAS, the accelerator mass spectrometer dedicated to 14C recently installed in Aix-en-Provence, France. *Nuclear Instruments and Methods in Physics Research, Section B: Beam Interactions with Materials and Atoms*, *361*, 80–86.

Bartolomei, G. (1966). Diagramma microfaunistico con Sicista della Grotta della Ferrovia nella “Gola della Rossa” del fiume Esino presso Iesi (Ancona). *Annali dell’Università di Ferrara, nuova serie, sezione IX, scienze geologiche e mineralogiche*, **4**, 69–75.

Bartolomei, G., Cattani, L. (2005). La fine dell’ultimo ciclo glaciale nella Valle dell’Esino,. Jesi, Ancona: considerazioni paleoecologiche. Atti della XXXXVIII Riunione scientifica: preistoria e protoistoria delle Marche: Portonovo, Abbadia di Fiastra, 1-5 ottobre 2003: vol. I-II.

Baele, G., Lemey, P., & Suchard, M. A. (2016). Genealogical Working Distributions for Bayesian Model Testing with Phylogenetic Uncertainty. *Systematic Biology*, *65*(2), 250–264. https://doi.org/10.1093/sysbio/syv083

Berto, C., Rubinato, G. (2013). The upper Pleistocene mammal record from Caverna degli Orsi (San Dorligo della Valle – Dolina, Trieste, Italy): A faunal complex between eastern and western Europe. *Quaternary International*, **284**, 1–8.

Bocheński, Z., Tomek, T. (2004). Bird remains from a rock-shelter in Krucza Skała (Central Poland). *Acta Zoologica Cracoviensia*, **47**,1-2: 27 – 47.

Borodin, A.V., Strukova, T.V., Ulitko ,A.I. (2000) Cheremukhovo-1–a New Historic–Ecological and Archeological Site in the Northern Urals (Locality and Stratigraphy). *Pleistocene and Holocene Faunas of the Urals*, 36-58.

Boschian, G., De Santis, A. (2011). Bears and Sediments at Caverna degli Orsi – Medvedja Jama (Trieste, Italy). In: Toškan, B. (eds.), Fragments of Ice Age Environments, Proceedings in Honous of Ivan Turk’s Jubilee. Opera Instituti Archaeologici Sloveniae, 21, pp. 181-207.

Boschian, G., Abbazzi, L., Gentili, S., Sala, B. (1998). The “Caverna degli Orsi”: a cave bear site with lithic industry in the Trieste Karst (NE Italy). In: UISPP, Proceedings of the XIII Congress, Forlì, 8-14 September 1996, Abaco Edizioni, Forlì, pp. 209–214.

Brock F, Bronk Ramsey C, Higham T. (2007) Quality assurance of ultrafiltered bone dating. *Radiocarbon,* 49, 187–92.

Broglio, A., Lollini, D. (1981). I ritrovamenti marchigiani del Paleolitico Superiore e del Mesolítico, in: Atti Del I Convegno Beni Culturali e Ambientali Delle Marche. Ancona, pp. 27–61.

Bronk Ramsey C. (2009) Bayesian analysis of radiocarbon dates. *Radiocarbon,* 51: 337–360.

Calattini, M., Galiberti, A., Tessaro, C. (2016). Massa Marittima (GR). Grotta del Sambuco: indagini 2015, Notiziario della Soprintendenza per i Beni Archeologici della Toscana 11. Firenze.

Calattini, M., Galiberti, A., Tessaro, C. (2019). La Grotta del Sambuco (Massa Marittima, GR): Risultati delle ultime ricerche. Bollettino di Archeologia Online X, 27–36.

Ceregatti, L., Berto, C., Fewlass, H., Baca, M., Luzi, E., Brancaleoni, G., Pereswiet-Soltan, A., Peresani, M. (2023). Integration of direct radiocarbon dating, genetic studies and taxonomy of small mammals to investigate the chronology of past climatic oscillations: The Last Glacial Maximum sequence of Grotta della Ferrovia (Fabriano, Italy). *Quaternary Science Reviews*, **309**, 108095.

Chmielewski, W. (1975). Paleolit środkowy i górny. In: Hensel, W. (ed), Prahistoria Ziem polskich 1. Paleolit i mezolit, Wrocław–Warszawa–Kraków–Gdańsk, 9-158.

Clark, G (ed). (1979). The North Burgos Archaelogical Survey. Bronze and Iron Age archaeology on the Meseta del Norte (Province of Burgos, North-Central Spain) 19, 18 - 156. Arizona State University. Dept. of Antropology, Arizona.

Conard, N.J., Moreau, L. (2004). Current Research on the Gravettian of the Swabian Jura. *Mitteilungen der Gesellschaft für Urgeschichte*, **13**, 29-59.

Cuenca-Bescos, G., Marín-Arroyo, A.B., Martínez, I., Gonzalez-Morales, M., Straus, L.G. (2012). Relationship between Magdalenian subsistence and environmental change. The mammalian evidence from El Miron (Spain). *Quaternary International*, **272–273**, 125–137.

Cyrek, K. (1994). Der jungpaläolitische Höhlefundplatz Krucza Skała in Mittelpolen. *Archäologisches Korrespondenzblatt*, **25**, 367 – 374.

Cyrek, K., Nadachowski, A., Madeyska, T., Bocheński, Z., Tomek, T., Wojtal, P., Miękina, B., Lipecki, G., Garapich, A., Rzebik-Kowalska, B., Stworzewicz, E., Wolsan, M., Godawa, J., Kościów, R., Fostowicz-Frelik, L., Szyndlar, Z. (2000). Excavation in the Deszczowa Cave (Kroczyckie Rocks, Częstochowa Upland, Central Poland). *Folia Quaternaria,* **71**, 5-84.

Cyrek, K., Sudoł-Procyk, M., Czyżewski, Ł. (eds) (2022). Late Magdalenian Campsite at Krucza Skała Rockshelter. Nicolaus Copernicus University, Toruń, 179 pp.

Czarnowski, S. J. (1926). Jaskinie wąwozu Stodoliska na prawym brzegu Prądnika pod Ojcowem. *Przegląd Archeol*., **3**, 7, 1: 18-33.

de Lombera-Hermida, A., Rodríguez-Álvarez, X.-P., Ameijenda-Iglesias, A., Díaz-Rodríguez, M., Rey-Rodríguez, I., Valverde-Tejedor, I., Pérez-Alberti, A., Cunha, P.P., Bal-García, H., Aldea-Moreira, X., Lorenzo-Salgueiro, C., Mosquera-Castro, T., & Fábregas-Valcarce, R. (2021). Between two worlds: Cova Eirós and the Middle-Upper Palaeolithic transition in NW Iberia. *Comptes Rendus Palevol*, **42**, 10, 859 – 886.

Dabney, J., Knapp, M., Glocke, I., Gansauge, M.-T., Weihmann, A., Nickel, B., Valdiosera, C., García, N., Pääbo, S., Arsuaga, J.-L., & Meyer, M. (2013). Complete mitochondrial genome sequence of a Middle Pleistocene cave bear reconstructed from ultrashort DNA fragments. *Proceedings of the National Academy of Sciences of the United States of America*, *110*(39), 15758–15763. https://doi.org/10.1073/pnas.1314445110

Delpiano D., Zupancich A., Bertola S., Martellotta E.F., Livraghi A., Cristiani E., Peresani M., 2022, *Flexibility within Quina lithic production systems and tool-use in Northern Italy: implications on Neanderthal behavior and ecology during early MIS 4*. **Archaeological and Anthropological Sciences**, 14, 219. doi.org/10.1007/s12520-022-01684-2

DeNiro, M.J. (1985) Postmortem preservation and alteration of in vivo bone collagen isotope ratios in relation to palaeodietary reconstruction. *Nature,* 317(6040), 806–9.

Duchene, S., Lemey, P., Stadler, T., Ho, S. Y. W., Duchene, D. A., Dhanasekaran, V., & Baele, G. (2020). Bayesian evaluation of temporal signal in measurably evolving populations. *Molecular Biology and Evolution*, *37*(11), 3363–3379. https://doi.org/10.1093/molbev/msaa163

Fadeeva, T.V., Smirnov, N.G., Kosintsev, P.A., Kourova, T.P., Kuzmina, E.A. (2000). Small mammals of the location of bone remains in the Rasik Grotto (Perm, the Kama River Basin. In: Goldberg et al. (eds) Biosphere and Humanity: materials of the conference of Young Scientists in memory of N.V. Timofeev-Resovsky. Ekaterinburg Press, Ekaterinburg, pp. 289-294 [in Russian].

Fadeeva, T.V., Kosintsev, P., Lapteva, E., Chaikovskiy, I., Chirkova, E. (2022). Environmental changes in the Middle Urals during Briansk interstadial: Makhnevskaya-2 cave (MIS 3, Russia). *Quaternary International*, **633**, 154-169.

Ferreira, M. A., & Suchard, M. A. (2008). Bayesian analysis of elapsed times in continuous-time Markov chains. *Canadian Journal of Statistics*, *36*(3), 355–368.

Fewlass, H., Talamo, S., Tuna, T., Fagault, Y., Kromer, B., Hoffmann, H., Pangrazzi, C., Hublin, J. J., & Bard, E. (2017). Size matters: Radiocarbon dates of <200 μg ancient collagen samples with AixMICADAS and Its Gas Ion Source. *Radiocarbon*, *60*(2), 425–439.

Fewlass H, Tuna T, Fagault Y, Hublin JJ, Kromer B, Bard E, Talamo S. (2019). Pretreatment and gaseous radiocarbon dating of 40–100 mg archaeological bone. *Scientific Reports,* 9, 1–11.

Gansauge, M.T., Aximu-Petr,i A., Nagel, S., Meyer, M. (2020). Manual and automated preparation of single-stranded DNA libraries for the sequencing of DNA from ancient biological remains and other sources of highly degraded DNA. Nat. Protoc., 15(8), 2279–2300.

Gretzinger, J., Molak, M., Reiter, E., Pfrengle, S., Urban, C., Neukamm, J., Blant, M., Conard, N., Cupillard, C., Dimitrijević, V., Drucker, D., Hofman-Kamińska, E., Kowalczyk, R., Krajcarz, M.T., Krajcarz, M., Münzel, S.C., Peresani, M., Romandini, M., Rufí, I., Soler, J., Terlato, G., Krause, J., Bocherens, H. (2019). Large-scale mitogenomic analysis of the phylogeography of the Late Pleistocene cave bear. *Scientific Reports*, **9**, 10700.

Gryczewska, N., Kot, M., Berto, C., Brancaleoni, G., Krajcarz, M.T., Cyrek, K., Sudoł-Procyk, M., Wojenka, M., Wilczyński, J., Chmielewska, M., Sulwiński, M., Suska-Malawska, M. (2023). Tracing ephemeral human occupation through archaeological, palaeoenvironmental and molecular proxies at Łabajowa Cave. *Antiquity*, **97**, 396, 1–6.

Guiry, E. J., & Szpak, P. (2021). Improved quality control criteria for stable carbon and nitrogen isotope measurements of ancient bone collagen. *Journal of Archaeological Science*, *132*.

Hopkins, R., Straus, L.G., Gonzalez-Morales, M. (2021). Assessing the chronostratigraphy of El Miron cave, Cantabrian Spain. *Radiocarbon*, **63**(3), 821–852.

Horáček, I. (2005). Small vertebrates in the Weichselian series in Dzeravá skala cave: list of the samples and a brief summary. Pleistocene Environments and Archaelogy of the Dzerava skala Cave, Lesser Carpathians, Slovakia, 157-167.

Horáček, I., Ložek, V., Knitlová, M., Juřičková, L. (2015). Darkness under candlestick: glacial refugia on mountain glaciers. Forgotten Times and Spaces: New Perspectives in Paleoanthropological, Paleoethnological and Archeological Studies. Brno: *Masaryk University*, 363–377.

Horáček, I., Sázelová, S. (2017). Vývoj fauny obratlovců v severočeských pískovcových územích během holocénu. In: Jiří Svoboda ed., Mezolit severních Čech. Brno: Archeologický ústav AVČR, Brno, v.v.i., 39–48.

Horn, S. (2012). Case study: Enrichment of ancient mitochondrial DNA by hybridization capture. *Methods in Molecular Biology*, *840*, 189–195. https://doi.org/10.1007/978-1-61779-516-9_22

Iriarte-Chiapusso, MJ., Arrizabalaga, A., Cuenca-Bescos, G., (2015). The vegetational and climatic contexts of the Lower Magdalenian human burial in El Miron Cave (Cantabria, Spain): implications related to human behaviour. *Journal of Archaeological Science*, **60**, 66–74.

Jánossy, D. (1961). Vorläufige Ergebnisse der Ausgrabungen in der Felsnische Rejtek I. (Bükkgebirge, Gem. Répáshuta). *Karszt- és Barlangkutatás*, **3**, 49–58.

Jánossy, D., Kordos, L. (1976). Pleistocene-Holocene Mollusc and Vertebrate Fauna of two caves in Hungary. *Annales Historico-Naturales Musei Nationalis* *Hungarici*, **68**, 5–29.

Jéquier, C., Peresani, M., Romandini, M., Delpiano, D., Joannes-Boyau, R., Lembo, G., Livraghi, A., Lopez-García, J.M., Obradovíc, M., Nicosia, C. (2015). The de Nada- lecave, a single layered Quina Mousterian site in the north of Italy. *Quartär*, 62, 7-21.

Kaminská, L., Kozłowski, J. K., Svoboda, J. (2005). Pleistocene environments and archaeology of the Dzerava skala Cave, Lesser Carpathians, Slovakia. Polish Academy of Arts and Sciences, Kraków.

Katoh, K., & Standley, D. M. (2013). MAFFT multiple sequence alignment software version 7: Improvements in performance and usability. *Molecular Biology and Evolution*, *30*(4), 772–780. https://doi.org/10.1093/molbev/mst010

Klimowicz, M., Nadachowski, A., Lemanik, A., Socha, P. (2016). Is enamel differentiation quotient (SDQ) of the narrow-headed vole (*Microtus gregalis*) useful for the Pleistocene biostratigraphy? *Quaternary International,* **420**, 348-356.

Kowalski, S. (1967). Wstępne wyniki badań archeologicznych w Jaskini Mamutowej prowadzonych w latach 1957-1964. *Materiały Archeologiczne*, **8**, 47-54.

Kowalski, S. (2006). Uwagi o osadnictwie paleolitycznym w Jaskiniach Ciemnej i Mamutowej w świetle badań lat 1957-1974. In: Lech, J., Partyka, J., (eds.) Jura Ojcowska w pradziejach i początkach państwa polskiego, Ojców, 335-354.

Kozłowski, L. (1922). Starsza epoka kamienia w Polsce, Poznań.

Kozłowski, J.K., Kozłowski, S.K. (1996). Le paléolithique en Pologne, serie „Préhistoire d’Europe” nr 2, Grenoble.

Krajcarz, M., Madeyska, T. (2010). Application of the weathering parameters of bones to stratigraphical interpretation of the sediments from two caves (Deszczowa Cave and Nietoperzowa Cave, Kraków-Częstochowa Upland, Poland). *Studia Quaternaria,* **27**, 43-54.

Krajcarz, M.T., Madeyska, T. (2022). Stratigraphy of sediments and reconstruction of sedimentary processes at Krucza Skała Rockshelter. In: Cyrek K., Sudoł-Procyk M., Czyżewski Ł. (eds.). Late Magdalenian Campsite at Krucza Skała Rockshelter, Nicolaus Copernicus University, Toruń, 15 – 32.

Krajcarz, M., Pacher, M., Krajcarz, M.T., Laughlan, L., Rabeder, G., Sabol, M., Wojtal, P., Bocherens, H. (2016a). Isotopic variability of cave bears (δ15N, δ13C) across Europe during MIS 3. *Quaternary Science Reviews*, **131**, 51-72.

Krajcarz, M., Makowiecki, D., Krajcarz, M.T., Masłowska, A., Baca, M., Panagiotopoulou, H., Romańska, A., Bednarczyk, J., Gręzak, A., Sudoł, M. (2016b). On the trail of the oldest domestic cat in Poland. An Insight from morphometry, ancient DNA and radiocarbon dating. *International Journal of Osteoarchaeology*, **26**(5), 912–919.

Krajcarz, M., Krajcarz, M.T., Baca, M., Baumann, C., Van Neer, W., Popović, D., Sudoł-Procyk, M., Wach, B., Wilczyński, J., Wojenka, M., Bocherens, H. (2020a). Ancestors of domestic cats in Neolithic Central Europe: Isotopic evidence of a synanthropic diet. *Proceedings of the National Academy of Sciences*, **117**(30), 17710–17719.

Krajcarz, M.T., Szymanek, M., Krajcarz, M., Pereswiet-Soltan, A., Alexandrowicz, W.P., Sudoł-Procyk, M. (2020b). Shelter in Smoleń III–A unique example of stratified Holocene clastic cave sediments in Central Europe, a lithostratigraphic stratotype and a record of regional paleoecology. *PloS one*, **15**(2), e022854.

Krajcarz, M.T., Baca, M., Baumann, C., Bocherens, H., Goslar, T., Popović, D., Sudoł-Procyk, M., Krajcarz, M. (2023). New insights into Late Pleistocene cave hyena chronology and population history—the case of Perspektywiczna Cave, Poland. *Radiocarbon*, **65**(5), 1038–1056.

Lagerholm, V.K., Sandoval-Castellanos, E., Ehrich, D., Abramson, N.I., Nadachowski, A., Kalthoff, D.C., Germonpré, M., Angerbjörn, A., Stewart, J.R., Dalén, L. (2014). On the origin of the Norwegian lemming. *Molecular Ecology*, **23**, 2063–2071.

Lagerholm, V.K., Sandoval-Castellanos, E., Vaniscotte, A., Potapova, O.R., Tomek, T., Bocheński, Z.M., Shepherd, P., Barton, N., van Dyck, M.-C., Miller, R., Höglund, J., Yoccoz, N.G., Dalén, L., Stewart, J.R. (2017). Range shift or extinction? Ancient DNA and distribution modelling reveal past and future responses to climate warming in cold-adapted birds. *Global Change Biology*, **23**, 1425–1435.

Lanfear, R., Frandsen, P. B., Wright, A. M., Senfeld, T., & Calcott, B. (2016). PartitionFinder 2: New methods for selecting partitioned models of evolution for molecular and morphological phylogenetic analyses. *Molecular Biology and Evolution*, *34*(3), msw260.

Lemanik, A., Baca, M., Wertz, K., Socha, P., Popović, D., Tomek, T., Lipecki, G., Kraszewska, A., Miękina, B., Żeromska, A., Pereswiet-Soltan, A., Szyndlar, Z., Cieśla, M., Valde-Nowak, P., Mackiewicz, P., Nadachowski, A. (2020). The impact of major warming at 14.7 ka on environmental changes and activity of Final Palaeolithic hunters at a local scale (Orawa-Nowy Targ Basin, Western Carpathians, Poland. *Archaeological and Anthropological Sciences*, **12**, 3, 66.

Lemanik, A., Nadachowski, A., Socha, P. (2022). Biostratigraphic significance of the root vole (*Alexandromys oeconomus*) for dating late Middle and early Late Pleistocene (MIS8‑MIS 3) Neanderthal sites in southern Poland. *Archaeological and Anthropological Sciences*, **14**, 112.

Livraghi, A., Fanfarillo, G., Dal Colle, M., Romandini, M., Peresani, M. (2021). Neanderthal ecology and the exploitation of cervids and bovids at the onset of MIS4: A study on De Nadale cave, Italy. *Quaternary International*, **586**, 24–41.

Lorenc, M. (2013). Radiocarbon ages of bones from Vistulian (Weichselian) cave deposits in Poland and their stratigraphy*. Acta Geologica Polonica,* **63**,(3), 399-424.

López-García, J.M., Blain, H.-A., Cuenca-Bescós, G., Ruiz-Zapata, M.B., Dorado-Valiño, M., Gil-García, M.J., Valdeolmillos, A., Ortega, A.I., Carretero, J.M., Arsuaga, J.L., Bermúdez de Castro, J.M., Carbonell, E. (2010). Palaeoenvironmental and palaeoclimatic reconstruction of the Latest Pleistocene of El Portalón Site, Sierra de Atapuerca, northwestern Spain. *Palaeogeography, Palaeoclimatology, Palaeoecology*, **292**, 453–464.

López-García, J.M., Blain, H.-A., Cuenca-Bescós, G., Alonso, C., Alonso, S., Vaquero, M., (2011). Small vertebrates (Amphibia, Squamata, Mammalia) from the late Pleistocene-Holocene of the Valdavara-1 cave (Galicia, northwestern Spain). *Geobios*, **44**, 253–269.

López-García, J.M., Livraghi, A., Romandini, M., Peresani, M. (2018). The de Nadale cave (Zovencedo, Berici hills, northeastern Italy): a small-mammal fauna from near the onset of marine isotope stage 4 and its palaeoclimatic implications. *Palaeogeography, Palaeoclimatology, Palaeoecology*, **506**, 196-201.

López-García, J.M., Berto C., Peresani, M. (2019). Environmental and climatic context of the hominin occurrence in northeastern Italy from the late Middle to Late Pleistocene inferred from small-mammal assemblages. *Quaternary Science Reviews*, **216**, 18–33.

Luzi, E. (2018). Morphological and morphometric variations in Middle and Late Pleistocene *Microtus* *arvalis* and *Microtus* *agrestis* populations: chronological insight, evolutionary trends and palaeoclimatic and palaeoenvironmental inferences. PhD Thesis, Universitat Rovira i Virgili.

Luzi, E., Berto, C., Calattini, M., Tessaro, C., Galiberti, A. (2022). Non-analogue communities in the Italian Peninsula during Late Pleistocene: The case of Grotta del Sambuco. *Quaternary International*, **632**, 132–138.

Madeyska, T. (1996). Osady skalnych schronisk w Kruczej Skale, Skałki Kroczyckie. *Kras i Speleologia*, **8**, 57–65.

Magyari, E.K., Gasparik, M., Major, I., Lengyel, G., Pál, I., Virág, A., Korponai, J., Haliuc, A., Szabó, Z., Pazonyi, P. (2022). Mammal extinction facilitated biome shift and human population change during the last glacial termination in East-Central Europe. *Scientific Reports*, **12**, 6796.

Maricic T, Whitten M, Pääbo S. (2010) Multiplexed DNA sequence capture of mitochondrial genomes using PCR products. PLoS ONE, 5, 9–13. (<https://doi.org/10.1371/journal.pone.0014004>)

Meyer M, Kircher M. 2010 Illumina sequencing library preparation for highly multiplexed target capture and sequencing. Cold Spring Harbor Protocols, 5(6), t5448. (doi: 10.1101/pdb.prot5448)

Mínguez, M. (2005) Estudios sobre Atapuerca (Burgos): III. Los materiales del Bronce Final de “El Portalón” de Cueva Mayor. Cuadernos de Arqueología de Deusto 20.

Nadachowski, A. (1976). Fauna kopalna w osadach Jaskini Mamutowej w Wierzchowiu koło Krakowa. *Folia Quaternaria*, **48**: 17–36.

Nadachowski, A. (1982). Late Quaternary rodents of Poland with special reference to morphotype dentition analysis of voles. Państwowe Wydawnictwo Naukowe, Warszawa - Kraków, 109 pp.

Nadachowski, A., Valde-Nowak, P. (2015) New Late Pleistocene faunal assemblages from Podhale Basin,Western Carpathians, Poland: preliminary results. *Acta Zoologica Cracoviensia*, **58**, 181–194.

Nadachowski, A., Harrison, D.L., Szyndlar, Z., Tomek, T., Wolsan, M. (1993). Late Pleistocene vertebrate fauna from Obłazowa 2 (Carpathians, Poland): paleoecological reconstruction. *Acta Zoologica Cracoviensia,* **36,** 2, 281–290.

Nadachowski, A., Żarski, M., Urbanowski, M., Wojtal, P., Miękina, B., Lipecki, G., Ochman, K., Krawczyk, M., Jakubowski, G., Tomek, T. (2009). Late Pleistocene environment of the Częstochowa Upland (Poland) reconstructed on the basis of faunistic evidence from archaeological cave sites. Institute of Systematics and Evolution of Animals, Polish Academy of Sciences, Kraków, 112 pp.

Nadachowski, A., Krajcarz, M., Lemanik, A., Lipecki, G., Marciszak, A., Miękina, B., Stefaniak, K., Tomek, T. (2022). Vertebrate remains from Krucza Skała Rockshelter. In: Cyrek K., Sudoł-Procyk M., Czyżewski Ł. (eds). Late Magdalenian Campsite at Krucza Skała Rockshelter. Nicolaus Copernicus University, Toruń, 138 – 160.

Orłowska, J., Osipowicz, G. (2022). *Baguette demi-ronde* (half-round rod) from Krucza Skała Rockshelter in the light of traceological analyses. In: Cyrek K., Sudoł-Procyk M., Czyżewski Ł. (eds). Late Magdalenian Campsite at Krucza Skała Rockshelter, Nicolaus Copernicus University, Toruń, 82–88.

Ortega, A.I., Juez, L., Carretero, J.M., Ortega, M.C., Arsuaga, J.L., Pérez-González, A. (2008a). El Neolítico en la nueva secuencia estratigráfica del yacimiento del Portalón de Cueva Mayor (Sierra de Atapuerca, Burgos). In: Hernández, M.S., Soler, J.A., López, J. A. (eds), IV Congreso de Arqueología Peninsular. MARQ, Museo Arqueológico de Alicante. Diputación de Alicante, Alicante, pp. 221–229.

Ortega, A.I., Juez, L., Carretero, J.M., Arsuaga, J.L., Pérez-González, A., Ortega, M.C., Pérez, A., Rodríguez, A.D., García, R., Gómez, A., Rodríguez, L., Santos, E., Pérez, R., Martínez, I. (2008b). A new Holocene archeological sequence from Portalón of Cueva Mayor (Sierra de Atapuerca, Burgos, Spain). BAR International Series, 1857: UISPP Proceedings of the XV World Congress, 18, pp. 3–10. Early Neolithic in the Iberian Peninsula.

Paronuzzi, P., Berto, C., Ghezzo, E., Thun Hohenstein, U., Massarenti, A., Reggiani, P., 2018. Nota preliminare sulla sequenza UMG di ex Cava a Filo (Croara, BO): gli aspetti stratigrafico-sedimentari, paleontologici e antropici alla luce delle ultime indagini (2006-2016). Memorie dell’Istituto Italiano di Speleologia II, 131–144.

Reimer, P. J., Austin, W. E. N., Bard, E., Bayliss, A., Blackwell, P. G., Bronk Ramsey, C., Butzin, M., Cheng, H., Edwards, R. L., Friedrich, M., Grootes, P. M., Guilderson, T. P., Hajdas, I., Heaton, T. J., Hogg, A. G., Hughen, K. A., Kromer, B., Manning, S. W., Muscheler, R., … Talamo, S. (2020). The IntCal20 northern hemisphere radiocarbon age calibration curve (0–55 cal kBP). *Radiocarbon*, *62*(4), 725–757.

Rohland, N., Glocke, I., Aximu-Petri, A., & Meyer, M. (2018). Extraction of highly degraded DNA from ancient bones, teeth and sediments for high-throughput sequencing. *Nature Protocols*, *13*(11), 2447–2461. https://doi.org/10.1038/s41596-018-0050-5

Rupysheva, T.A., Strukova, T.V. (2010). Small mammal faunas from eastern slope of the Middle Urals in early and middle Holocene. The dynamics of ecosystem in Holocene. Proceedings, Second All-Russian Scientific conference, Yekaterinburg, pp 165-200 [in Russian].

Rey-Rodríguez, I., López-García, J.-M., Bennàsar, M., Bañuls-Cardona, S., Blain, H.-A., Blanco-Lapaz, Á., Rodríguez-Álvarez, X.-P., de Lombera-Hermida, A., Díaz-Rodríguez, M., Ameijenda-Iglesias, A., Agustí, J., Fábregas-Valcarce, R. (2016). Last Neanderthals and first Anatomically Modern Humans in the NW Iberian Peninsula: Climatic and environmental conditions inferred from the Cova Eirós small-vertebrate assemblage during MIS 3. *Quaternary Science Reviews*, **151**, 185 – 197.

Rodríguez-Álvarez, X.P., De Lombera Hermida, A., Fábregas Valcarce, R., Lazuén Fernández, T. (2011). The Upper Pleistocene Site of Cova Eirós. In A. De Lombera Hermida & R. Fábregas Valcarce (eds), *To the West of Spanish Cantabria: the Palaeolithic Settlement of Galicia* (British Ar, Issue Figure 1, pp. 123–132).

Smith, S., Sandoval-Castellanos, E., Lagerholm, V.K., Napierala, H., Sablin, M., von Seth, J., Fladerer, F.A., Germonpré, M., Wojtal, P., Miller, R., Stewart, J.R., Dalén, L. (2017). Nonreceding hare lines: genetic continuity since the Late Pleistocene in European mountain hares (*Lepus timidus*). *Biological Journal of the Linnean Society*, **XX**, 1-18.

Stieber, J., (1969). Esami antracotomici sulla storia della vegetazione tardiglaciale in Ungheria (A hazai későglaciális vegetációtörténet anthrakotómiai vizsgálatok alapján). *Földtani Közlöny*, **99**, 188–193.

Strukova, T.V. (2000). Typology of Late Pleistocene and Holocene small mammal faunas of the Middle Trans-Urals. Biosphere and Mankind. Proceedings, Young Scientists’ Conference, Devoted to the Memory of N.V. Timofeev-Resovsky. Ekaterinburg Publishing, Ekaterinbur, pp 251-260 [in Russian].

Strukova, T.V., Bachura, O.P., Borodin., A.V., Stefanovskii, V.V. (2006). Mammal fauna first found in alluvial-speleogenic formations of the late Neopleistocene and Holocene, northern Urals, locality Cheremukhovo-1. *Stratigraphy and Geological Correlation*, **14**, 91-101.

Stuart, A.J., Lister, A.M. (2012). Extinction chronology of the woolly rhinoceros Coelodonta antiquitatis in the context of late Quaternary megafaunal extinctions in northern Eurasia. *Quaternary Science Reviews*, **51**, 1–17.

Suárez-Bilbao, A., García-Ibaibarriaga, N., Castaños, J., Castaños, P., Iriarte, M.J., Arrizabalaga, A., Torres, T., Ortiz, J.E., Murelaga, X. (2016). A new Late Pleistocene non-anthropogenic vertebrate assemblage from the northern Iberian Peninsula: Artazu VII (Arrasate, Basque Country). *C. R. Palevol,* **15**, 950-957.

Suárez-Bilbao, A., Garcia-Ibaibarriaga, N., Arrizabalaga, A., IriarteChiapusso, M. J., Murelaga, X. (2017). Paleoenvironmental and Paleoclimatic approach to the late Pleistocene site of Artazu VII (Arrasate, northern Iberian Peninsula) using small mammals. *Ameghiniana*, **54**(6), 641–654.

Suárez-Bilbao, A., Elorza, M., Castaños, J., Arrizabalaga, A., Iriarte-Chiapusso, M.J., Murelaga, X. (2018). The Late Pleistocene avifauna from Artazu VII (Basque Country, northern Iberian Peninsula). *Historical Biology*, **32**(3), 307–320.

Suchard, M. A., Lemey, P., Baele, G., Ayres, D. L., Drummond, A. J., & Rambaut, A. (2018). Bayesian phylogenetic and phylodynamic data integration using BEAST 1.10. *Virus Evolution*, *4*(1), 1–5. https://doi.org/10.1093/ve/vey016

Sudoł, M., Krajcarz, M. (2014). Wyniki badań sondażowych w Schronisku w Górze Smoleń II oraz Schronisku w Smoleniu III, województwo śląskie. In: Glanc-Zagaja, G., (ed) Badania Archeologiczne na Górnym Śląsku i ziemiach pogranicznych w latach 2011–2012. Katowice: Śląskie Centrum Dziedzictwa Kulturowego w Katowicach, pp. 13–21.

Sudoł, M., Bokiniec, E., Krajcarz, M., Krajcarz, M.T., Trojan, A., Grafka, O. (2015). Human activity traces from Shelter in Smoleń III (central part of Kraków-Częstochowa Upland) from the last centuries of antiquity. *Przegląd Archeologiczny*, **63**, 177–193.

Sudoł, M., Cyrek, K., Krajcarz, M., Krajcarz, M.T. (2016). Around the Biśnik Cave – the area of human penetration during Palaeolithic. *Anthropologie*, **LIV/1**, 49–6.

Sümegi, P., Náfrádi, K. (2015). A radiocarbon-dated cave sequence and the Pleistocene /Holocene transition in Hungary. *Open Geosciences*, **1**, 783–798.

Sümegi, P., Rudner, E., Töröcsik, T. (2012). Environmental and chronological reconstruction problems during the Pleistocene/Holocene transition in Hungary. In: Kolozsi, B. (ed.): Őskoros kutatók IV. összejövetelének konferenciakötete, Déri Múzeum Régészeti Tár, Debrecen, pp. 279–298. (in Hungarian with English abstract).

Synal, H. A., Stocker, M., & Suter, M. (2007). MICADAS: A new compact radiocarbon AMS system. *Nuclear Instruments and Methods in Physics Research, Section B: Beam Interactions with Materials and Atoms*, *259*(1), 7–13.

Terlato, G., Livraghi, A., Romandini, M., Peresani, M., (2019). Large bovids on Neanderthal menu: exploitation of *Bison priscus* and *Bos primigenius* in northeastern Italy. *Journal of Archaeological Science: Reports*, 25, 129-143.

Trinkaus, E., Haduch, E., Valde-Nowak, P., Wojtal, P. (2014). The Obłazowa 1 pollical distal phalanx and Late Pleistocene distal thumb proportions. *Journal HOMO of Comparative Human Biology*, **65**(1), 1–12.

Wacker L, Němec M, Bourquin J, (2010a) A revolutionary graphitisation system: Fully automated, compact and simple, Nuclear Instruments and Methods in Physics Research, Section B: Beam Interactions with Materials and Atoms, 268, 931–934.

Wacker, L., Christl, M., & Synal, H. A. (2010b). Bats: A new tool for AMS data reduction. *Nuclear Instruments and Methods in Physics Research, Section B: Beam Interactions with Materials and Atoms*, *268*(7–8), 976–979.

Valde-Nowak, P., Nadachowski, A. (2014). Micoquian assemblage and environmental conditions for the Neanderthals in Obłazowa Cave, Western Carpathians, Poland. *Quaternary International*, **326-327**, 146–156.

Valde-Nowak, P., Nadachowski, A.,Wolsan, M. (1987). Upper Palaeolithic boomerang made of a mammoth tusk in South Poland. *Nature*, **329**, 436–438.

Valde-Nowak, P., Nadachowski, A., Madeyska, T. (eds). (2003). Obłazowa Cave: human activity, stratigraphy and palaeoenvironment. Institute of Archaeology and Ethnology Polish Academy of Sciences, Kraków.

Valde-Nowak, P., Kraszewska, A., Cieśla, M., Nadachowski, A. (2018). Late Magdalenian campsite in a rock shelter at the Obłazowa Rock. In: Valde-Nowak, P., Sobczyk, K., Nowak, M., Żrałka, J. (eds) Multas per Gentes et Multa per Saecula. Anici magistro et college suo ioanni Christopho Kozłowski dedicant. Institute of Archeology, Jagiellonian University, Kraków, pp 175–183.

van Klinken GJ, 1999 Bone collagen quality indicators for palaeodietary and radiocarbon measurements. *Journal of Archaeological Science,* 26(6), 687–695.

Vaquero, M., Alonso, S., Alonso, C., Ameijenda, A., Blain, H.A., Fábregas Valcarce, R., Gómez, G., de Lombera, A., López-García, J.M., Lorenzo, C., Lozano, M., Rodríguez, C., Rosell, J., Serna, M.R. (2009). Nuevas fechas radiométricas para la Prehistoria del noroeste de la Península Ibérica: la cueva de Valdavara (Becerreá, Lugo). *Trabajos de Prehistoria*, **66**, 99–113.

Vera, J.A., Ed. (2004). Geología de España. Instituto Geológico y Minero de España/Sociedad Geológica de España, Madrid.

Vértes, L. 1956. Ausgrabungen in der Petényi- und Peskő-Höhle (Bükk-Gebirge). *Folia Archeologica*, **8**, 3–22.

Vértes, L. (1965). Paleolithic and Mesolithic remains in Hungary (Az őskőkor és az átmeneti kőkor emlékei Magyarországon). *Akadémiai Kiadó*.

Vidal-Matutano P., Livraghi A., Peresani M., 2022. *New charcoal evidence at the onset of MIS 4 : First insights into fuel management and the local landscape at De Nadale cave (northeastern Italy).* **Review of** **Palaeobotany and Palynology**, 298, 104594. doi.org/10.1016/j.revpalbo.2021.104594

Wilczyński, J. (2016). A new beginning: modern humans in Poland In: Kabaciński, J. (ed), The Past Societes. Polish lands from the first evidence of human presence to the Early Middle Ages, Warszawa, pp. 111-128.

Wilczyński, J., Krajcarz, M.T., Moskal-del Hoyo, M., Alexandrowicz, W.P., Miękina, B., Pereswiet-Soltan, A., Wertz, K., Lipecki, G., Marciszak, A., Lõugas, L., Gradziński, M., Szczepanek, A., Zastawny, A., Wojenka, M. (2020). Late Glacial and Holocene paleoecology and paleoenvironmental changes in the northern Carpathians: Żarska Cave (southern Poland) case study. *The Holocene*, **30**(6), 905-922.

Wojenka, M., Wilczyński, J., Sobieraj, D. (2011). Archaeological excavations in Żarska Cave (Żary, com. Krzeszowice, Krakow district) in 2011. *Recherches Archaeologiques,* 143-156.

Wojenka, M., Wilczyński, J., Zastawny, A. (2016). Archaeological excavations in Żarska Cave in Żary, Kraków district, 2012–2015: an interim report. *Recherches Archéologiques NS*, **8**, 185-204.

Wojtal, P. (2007). Zooarchaeological studies of the Late Pleistocene sites in Poland, Kraków.

Zawisza, J. (1884). Jaskinia Mamutowa w dolinie Wierzchowskiej. *Wiadomości Archeologiczne,* **2**, 1-23.
